# Supplementary material for: The Influence of Branch Order on Optimal Leaf Vein Geometries: Murray’s Law and Area Preserving Branching
Source: PubMed Central journal article supplement (PMC3877374; doi:10.1371/journal.pone.0085420), 2013-12-31

## Supporting Information

### Methods: Cleared Leaves Analyses

Previous work using this same collection of leaf images has shown that their measured vein densities (vein length/leaf area) overlap, but are slightly lower than those reported previously using magnified images, and thus some leaves may under-represent the minor most veins. To validate that our results are not dependent on the use of these images, we cleared and scanned at high resolution, vein networks from an additional 10 leaves from the following species:

*Scaevola crassifolia* Labill., *Banksia arborea* (C.A.Gardner) A.R.Mast & K.R.Thiele,

*Banksia quercifolia* R.Br., *Dampiera teres* Lindl., *Azalea* sp., *Eremophila denticulata*

F.Muell., *Diplolaena grandiflora* Desf., *Grevillea pimeleoides* W.Fitzg. All leaves were

collected locally in the Perth region, Western Australia, and in all leaves the minor most

veins are clearly visible. As the leaf network images for these leaves were obtained using

different methods than the Smithsonian collection, and serve only a confirmatory role in our

analysis, we have analysed and presented these results here.

The 10 leaves constitute an additional 191,769 individual vein measurements. As seen in Fig. S340, the distribution of area ratios is striking similar to that found in Fig. 1 in the main manuscript with a mean of 1.25 and a median of 1.26. Moreover, boxplots of the area ratios as a function of vein order (Figs. S341-S351) reveal patterns fully consistent those found in the 339 leaves from the Smithsonian collection. Namely, the frequency distribution for orders 1-4 tend to overlap more strongly with the expectation from Murray's law, while the higher order veins shift toward area-preserving branching.

**Figures S1-S339:** Area ratio as a function of vein order for each of the 339 leaves from the Smithsonian leaf collection analysed in this study.

**Figure S340:** Frequency distribution of the area ratio for 191,769 individual vein junctions across the additional 10 leaves that analysed as described in the “10 Leaves Results” above. The mean and median are nearly equal to the expectation for Murray’s law when daughter branches are symmetric.

**Figures S341-S351:** Area ratio as a function of vein order for each of the 10 additional leaves as described in the Supplemental Material. The box and whisker plots for these 10 leaves are entirely consistent with those from the Smithsonian leaf collection (Figs. S1-S339). Lower order veins overlap more strongly with the expectation from Murray’s law and higher order veins overlap more strongly with the expectation for area preserving branching or elastic similarity.

- - - Murrays Law - - - Elastic Similarity

*Salix nivalis* Hook.

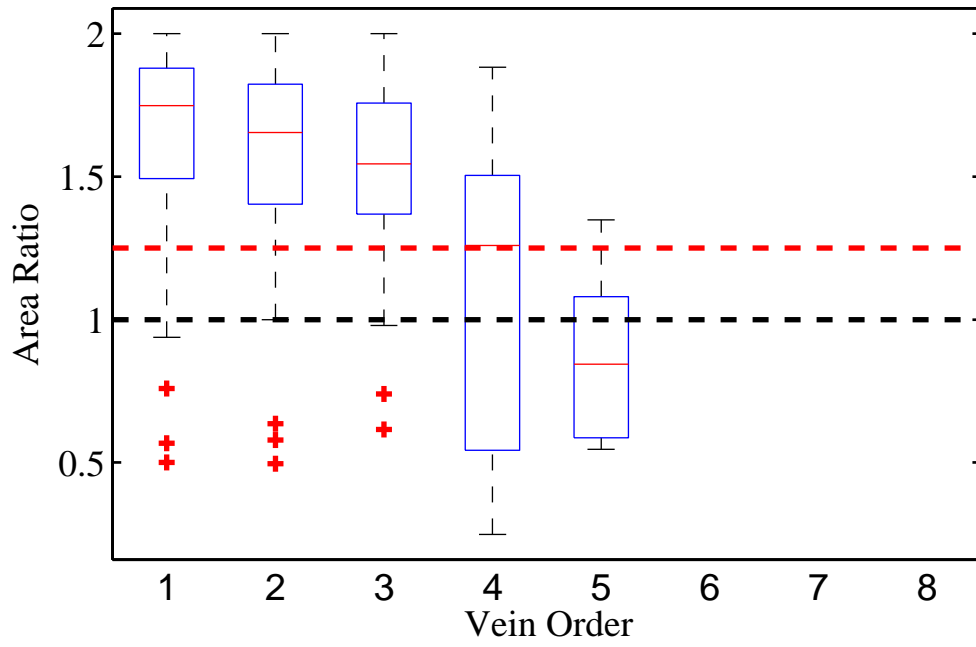

- - - Murrays Law   - - - Elastic Similarity

*Salix saximontana* Rydb.

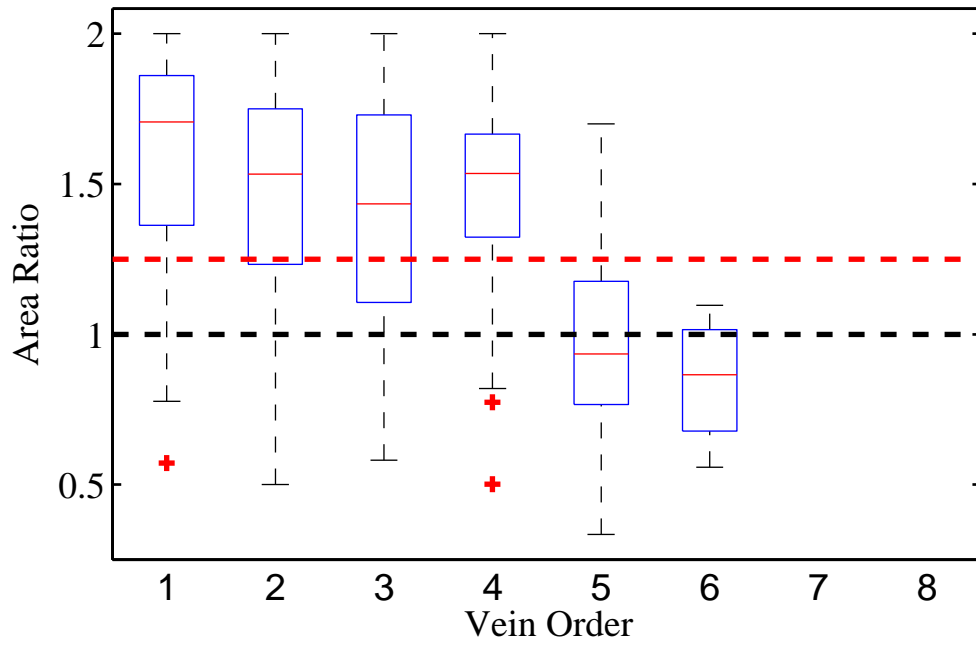

- - - Murrays Law   - - - Elastic Similarity

*Diospyros grisebachii* (Hiern.) Standley

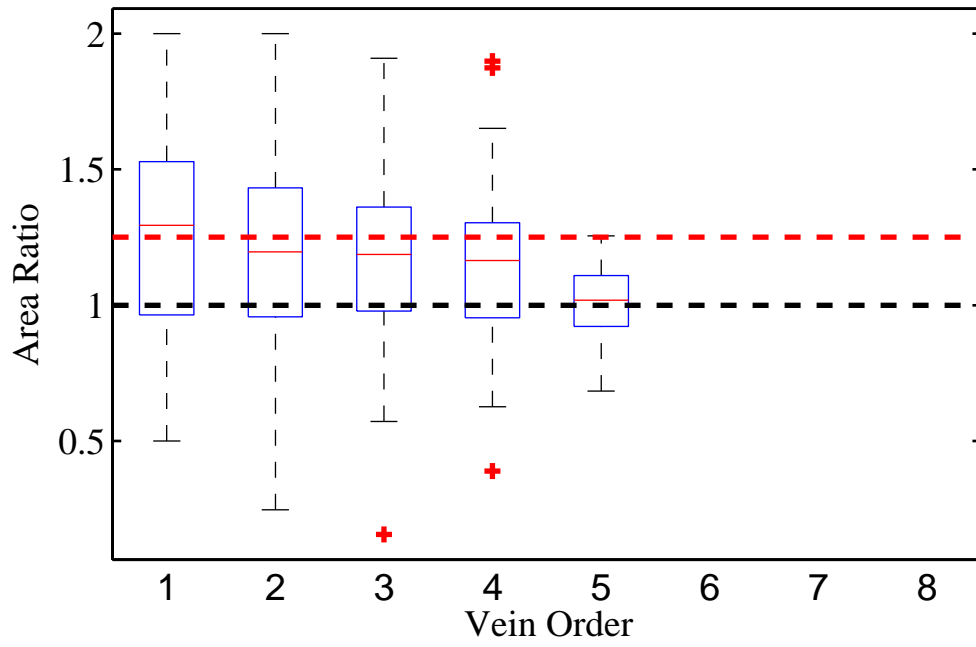

- - - Murrays Law   - - - Elastic Similarity

*Salix petrophila* Rydb.

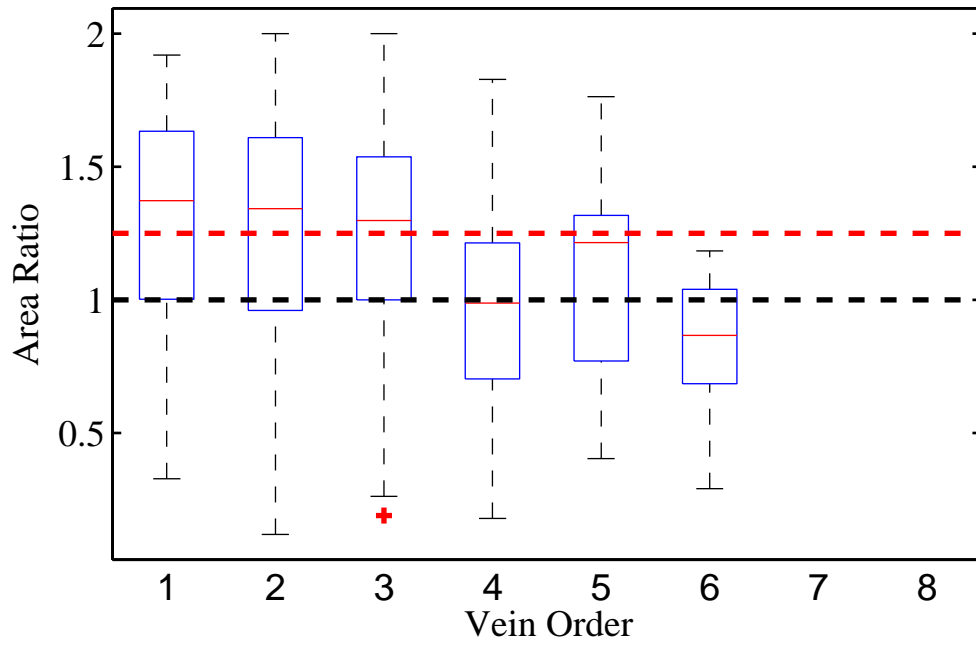

- - - Murrays Law - - - Elastic Similarity

*Phyllanthus emblica* L.

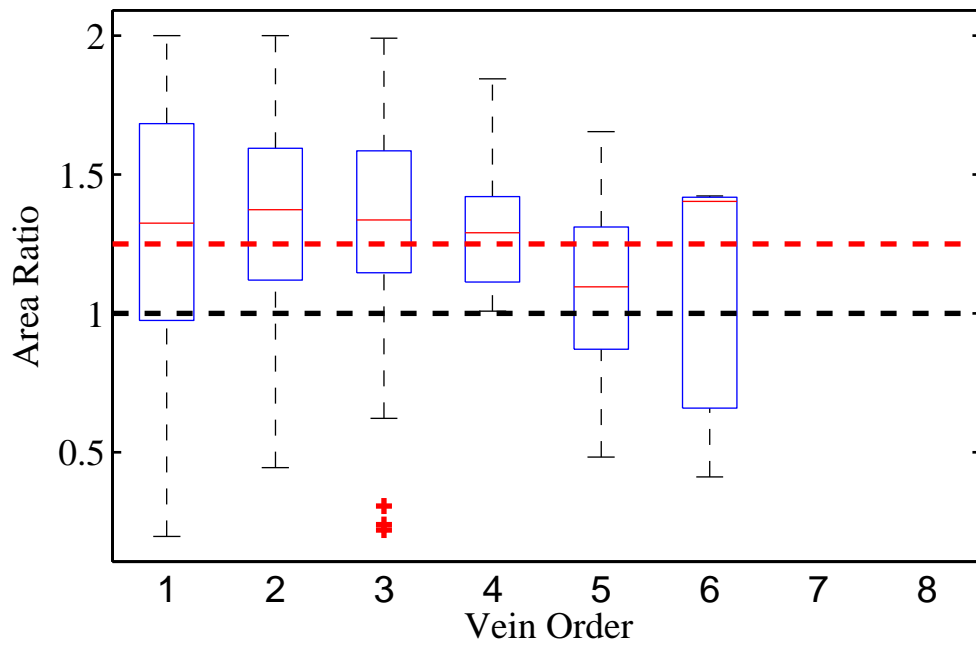

- - - Murrays Law   - - - Elastic Similarity

*Auerodendron cubensis* (Britt & Wils.) Urb.

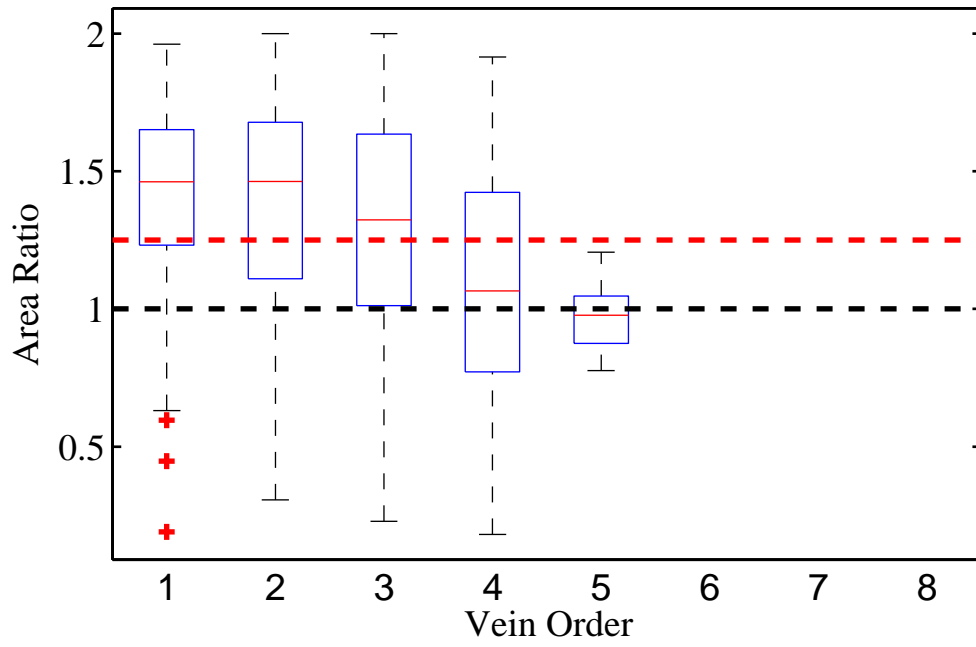



- - - Murrays Law - - - Elastic Similarity

*Bulnesia arborea* (Jacq.) Engler

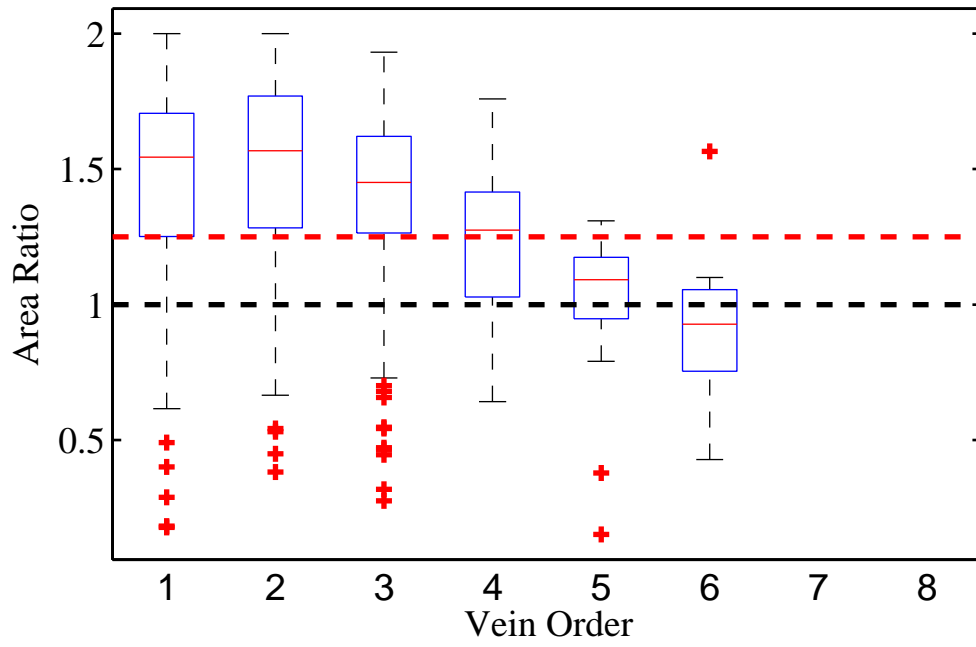

- - - Murrays Law   - - - Elastic Similarity

*Spiraea densiflora* Nutt

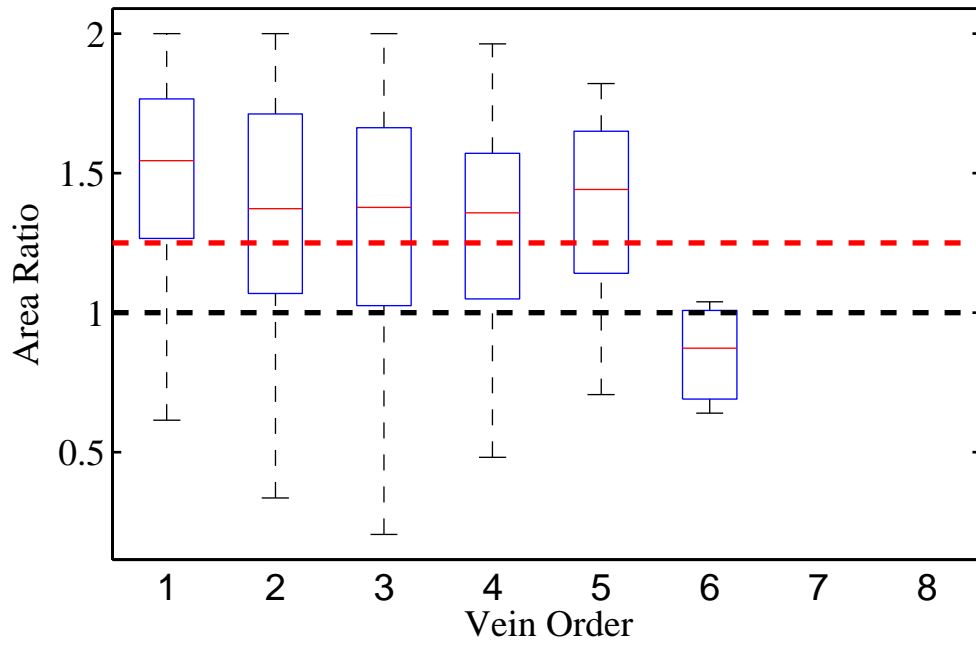

- - - Murrays Law - - - Elastic Similarity

*Vaccinium myrtillus* L.

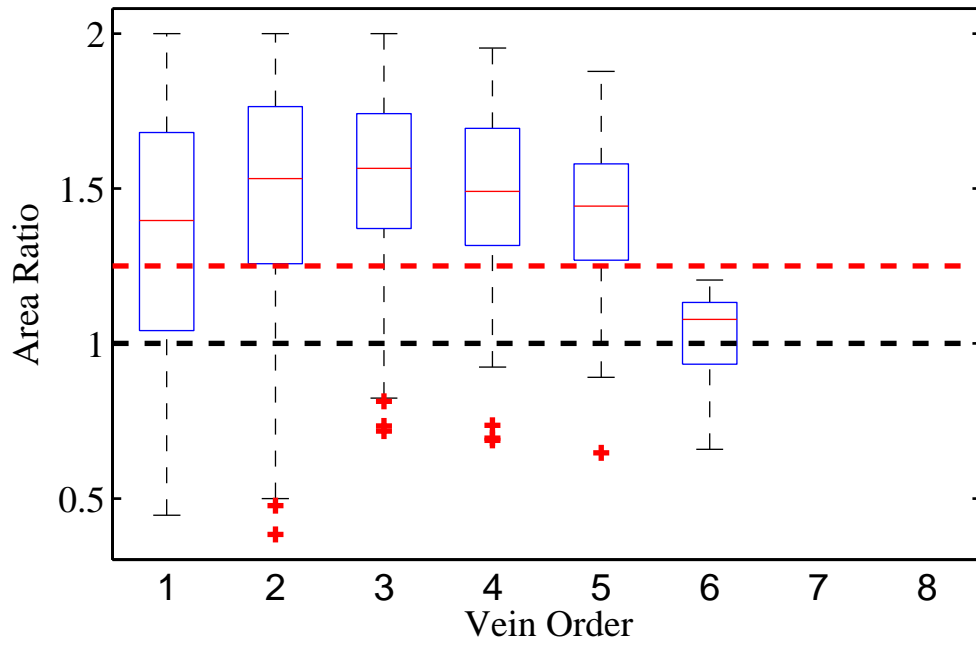

- - - Murrays Law - - - Elastic Similarity

Dendromecon rigida

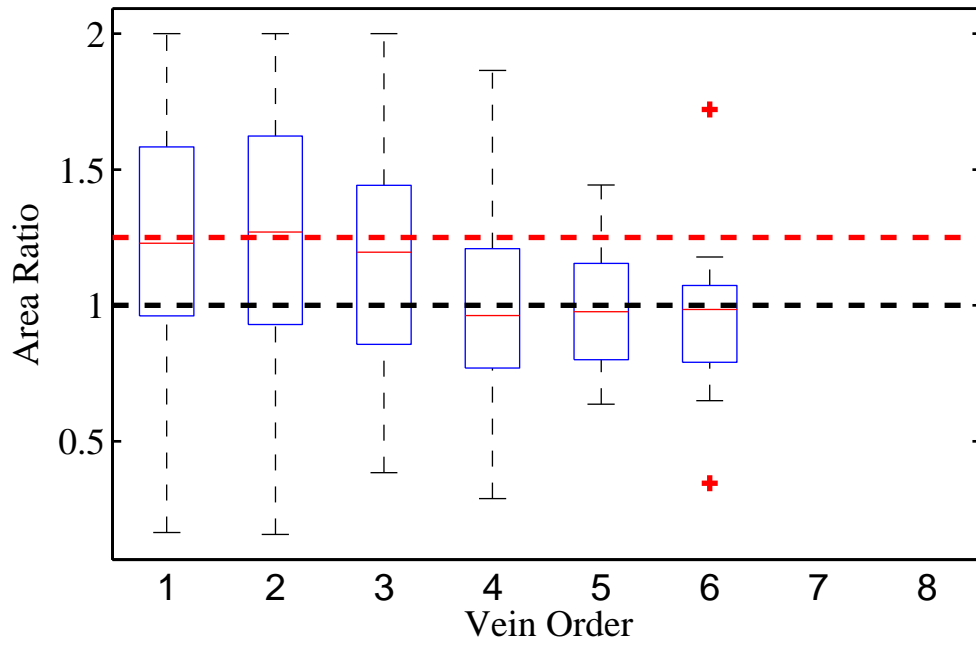

- - - Murrays Law - - - Elastic Similarity

*Betula nana* L. *exilis* (Sukatch.) Hu H.

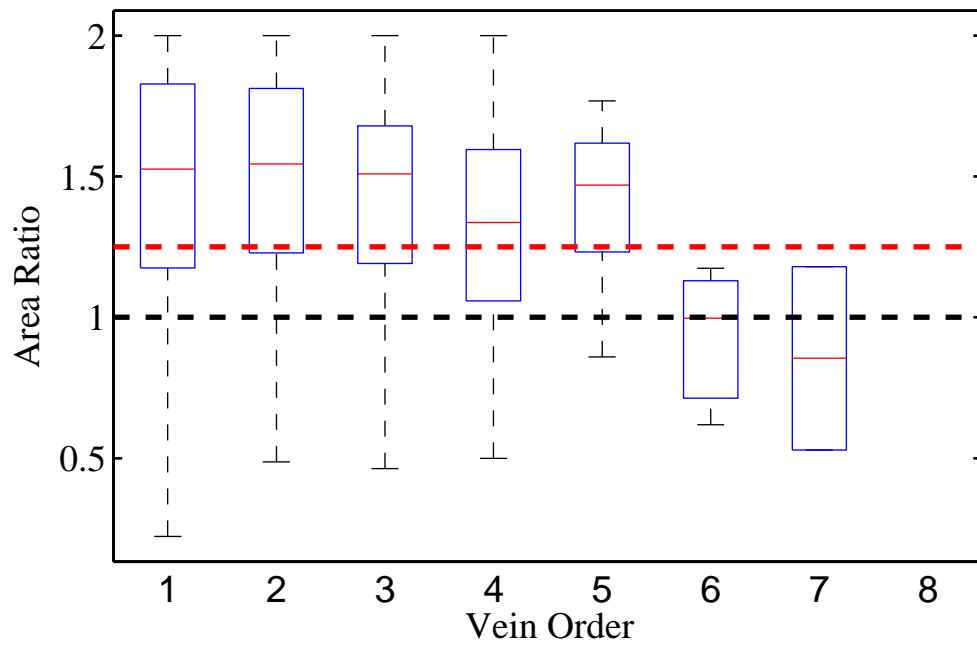

- - - Murrays Law - - - Elastic Similarity

*Rosa bracteata* Wendl.

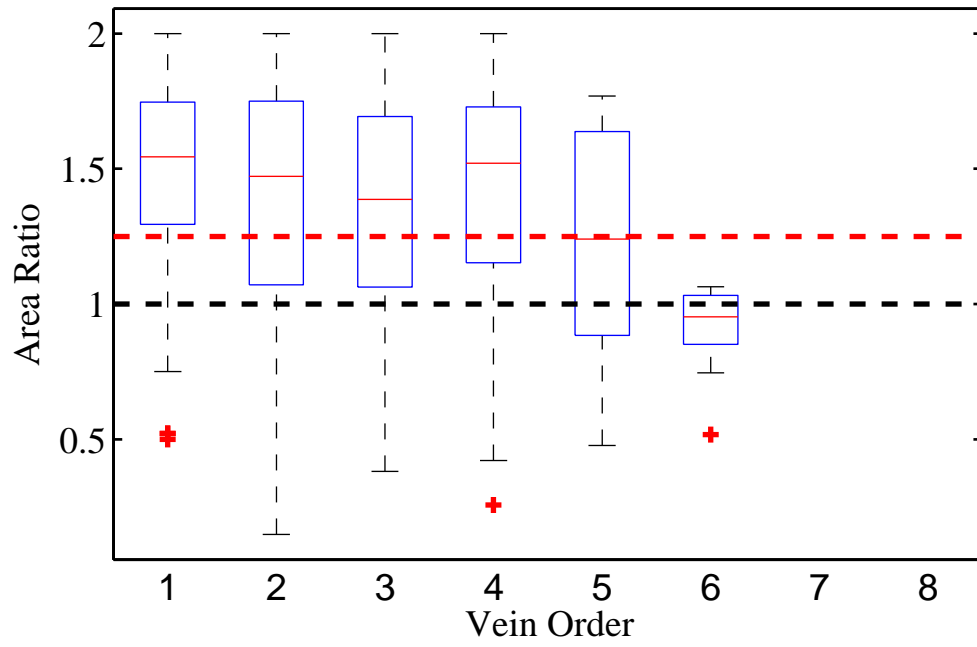

- - - Murrays Law - - - Elastic Similarity

Dendromecon rigida Benth.

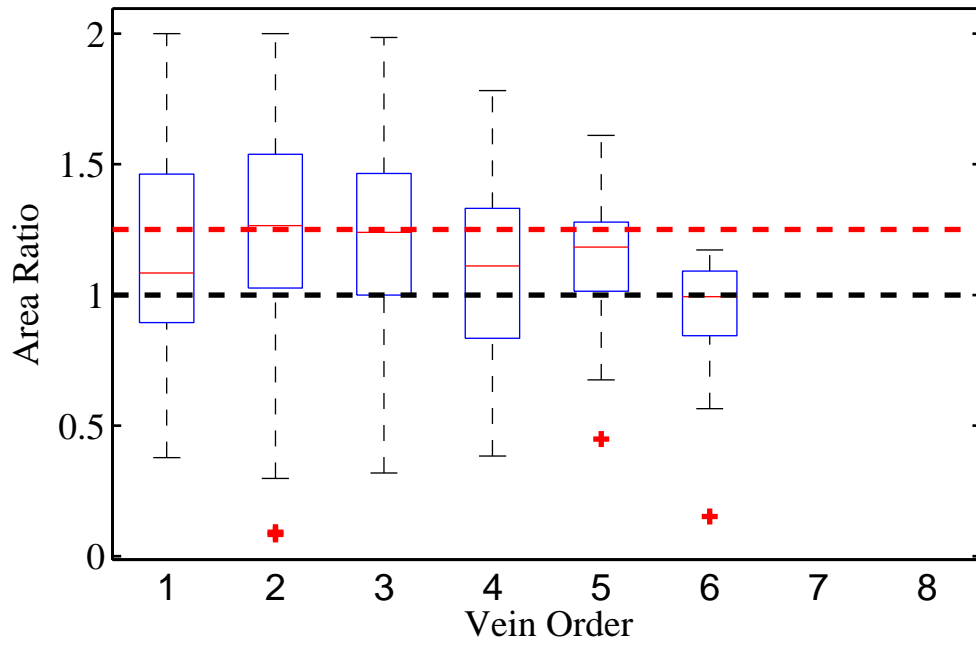

- - - Murrays Law - - - Elastic Similarity

*Salix pedicellaris* Pursh

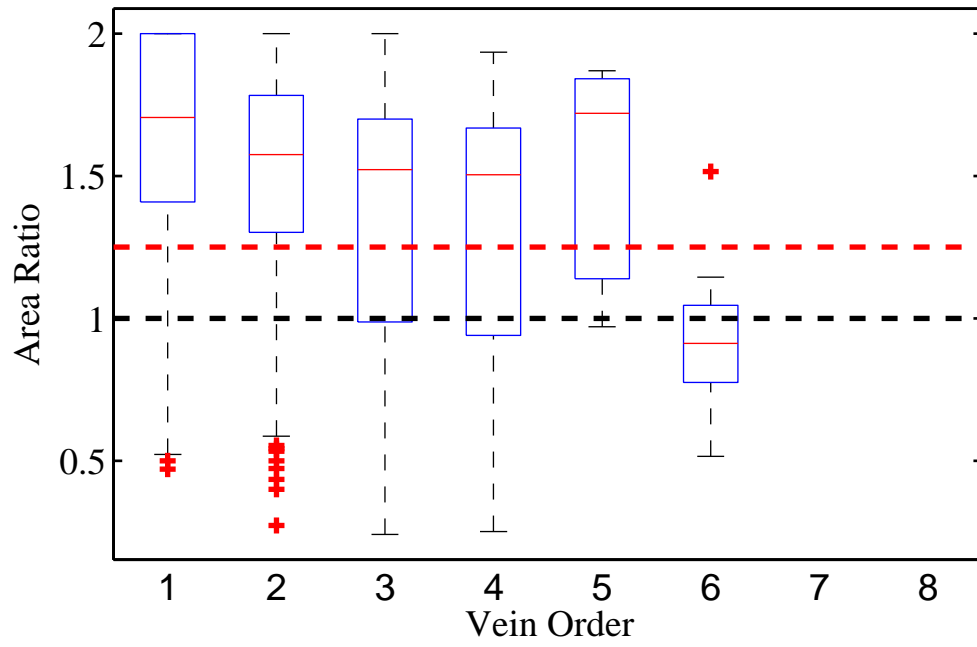



- - - Murrays Law   - - - Elastic Similarity

*Salix myrtilloides* L.

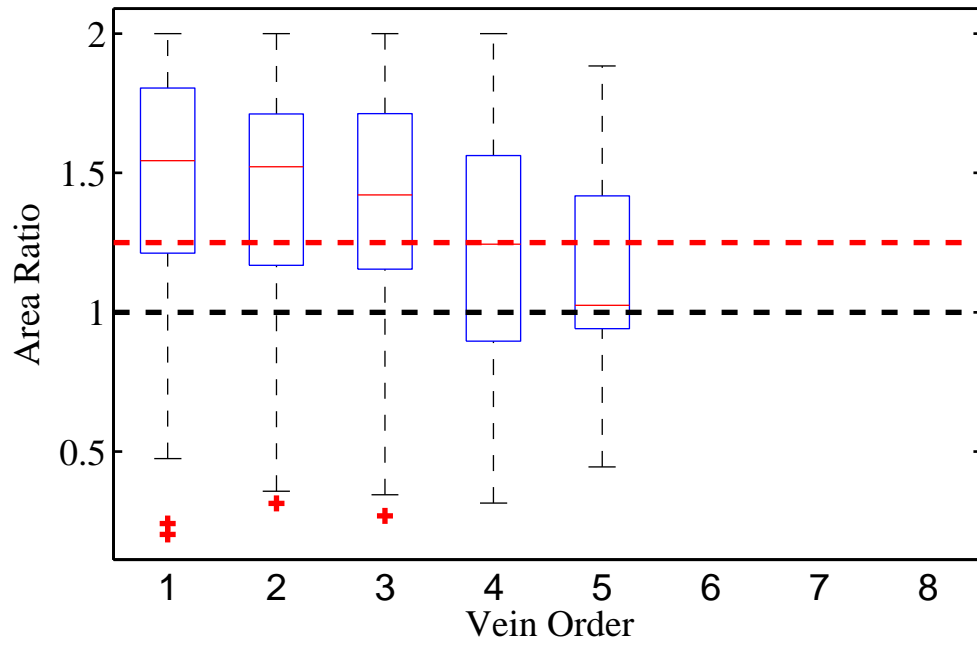

- - - Murrays Law   - - - Elastic Similarity

Salix breweri Bebb.

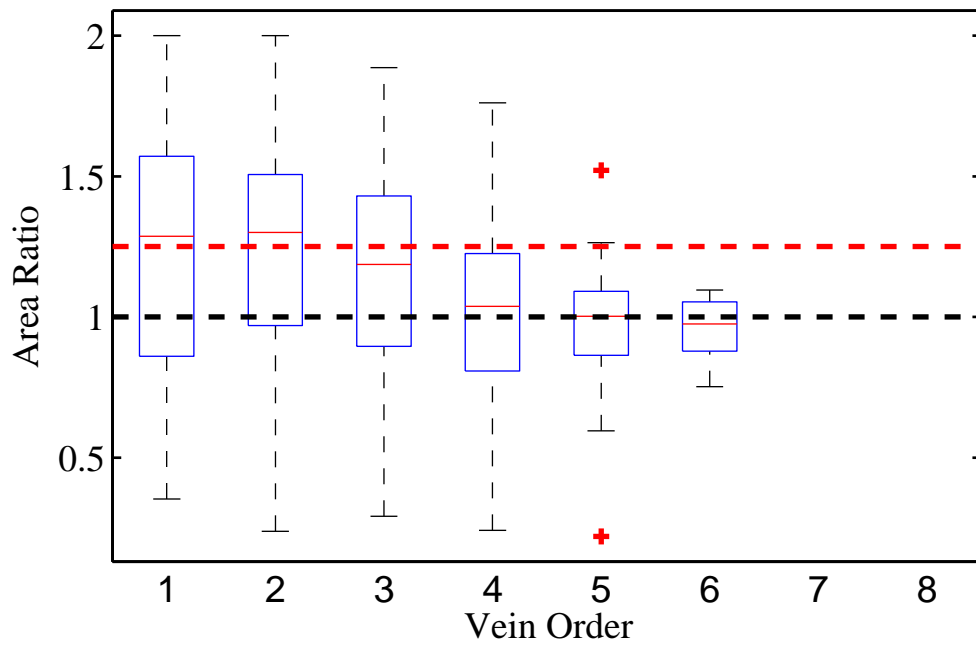

- - - Murrays Law - - - Elastic Similarity

*Vaccinium mathewsii* Sleumer

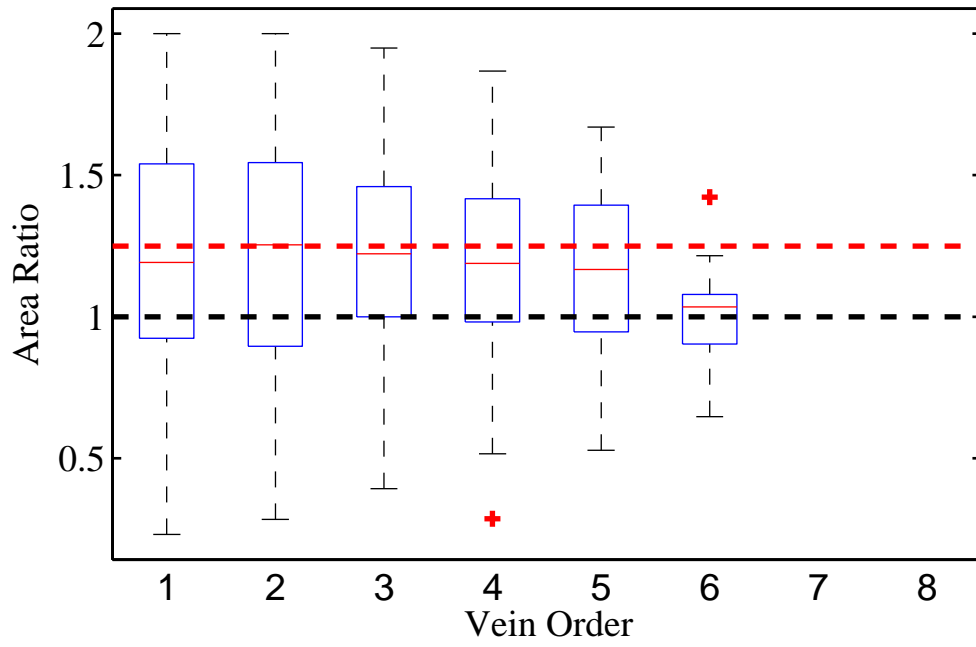

- - - Murrays Law - - - Elastic Similarity

*Flacourtia indica* (Burm.) Merr.

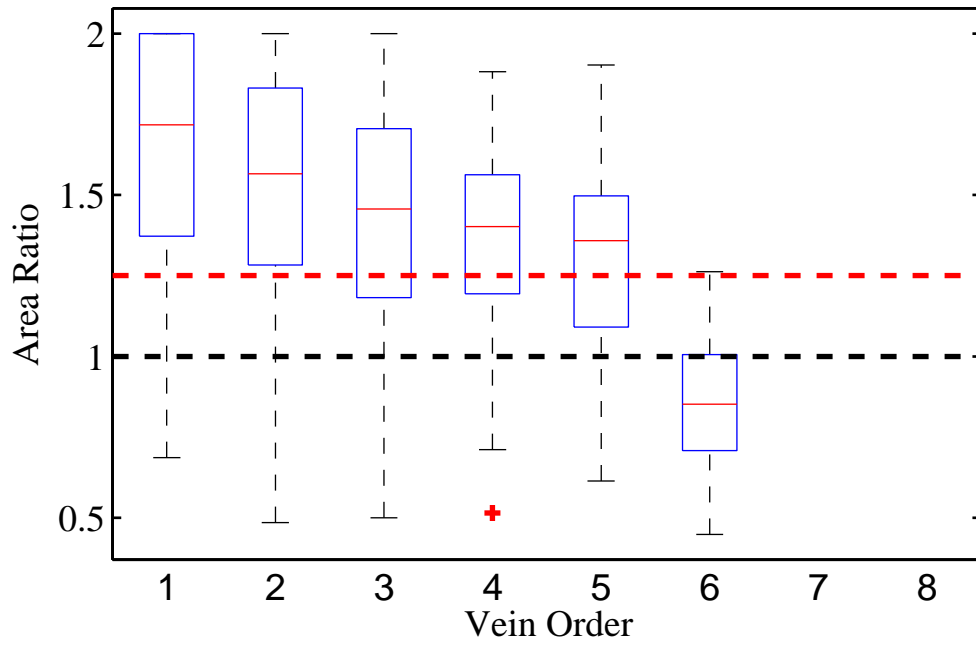

- - - Murrays Law - - - Elastic Similarity

*Akebia quinata*

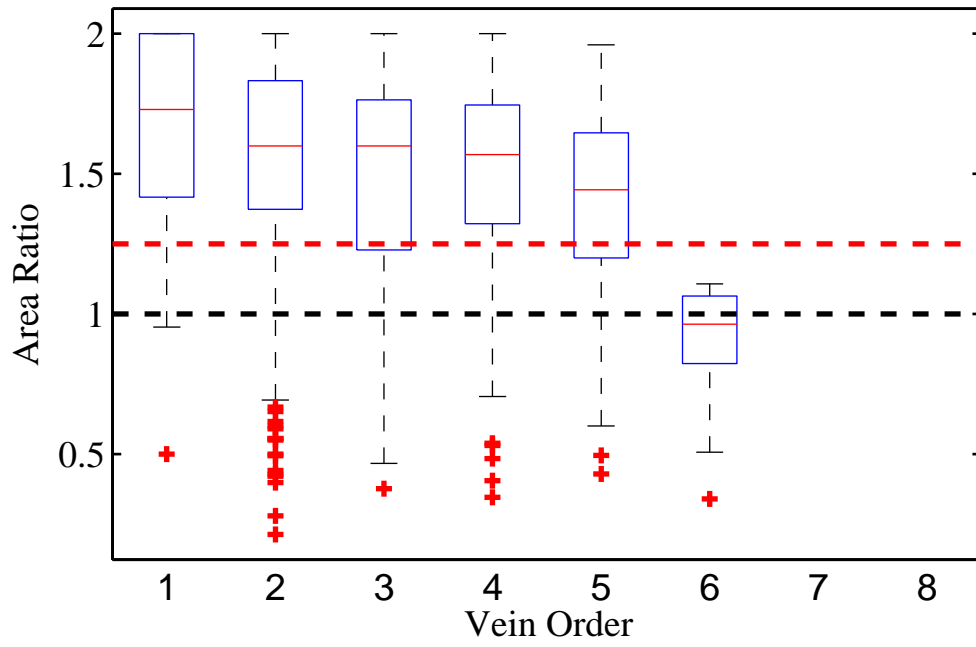

- - - Murrays Law - - - Elastic Similarity

*Demosthenesia graebneriana* (Hoer.) A.C. Sm.

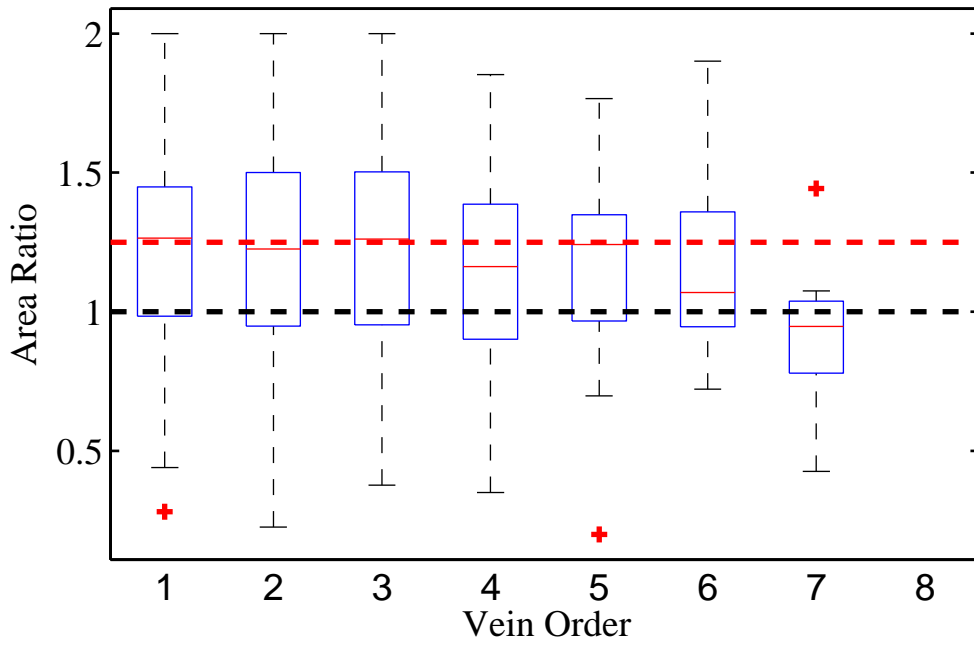

- - - Murrays Law - - - Elastic Similarity

Bubbia schlechteri Guill.

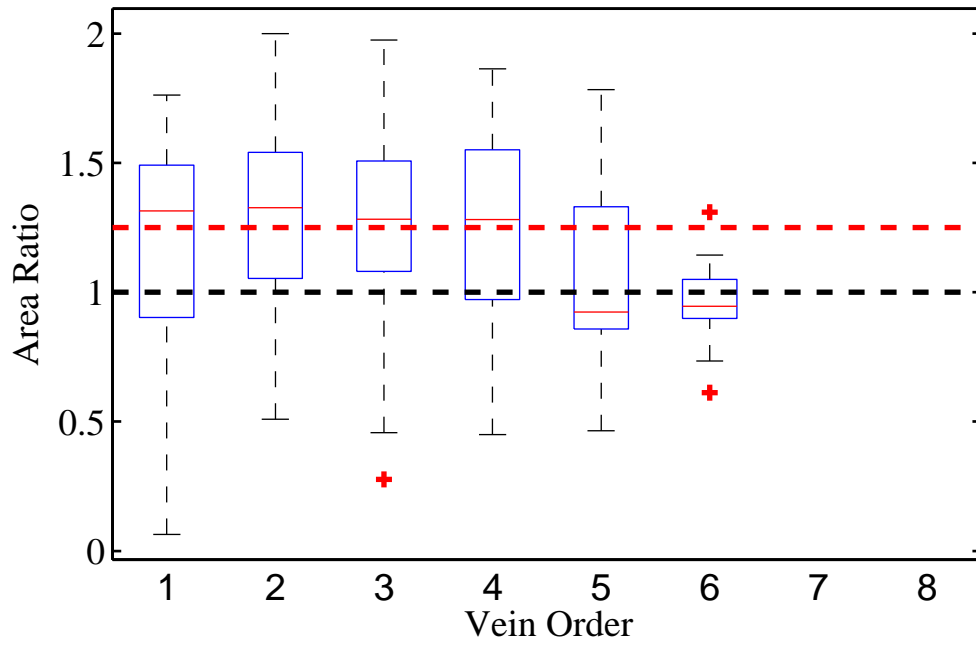

- - - Murrays Law - - - Elastic Similarity

*Salix arctolitoralis* Hult.

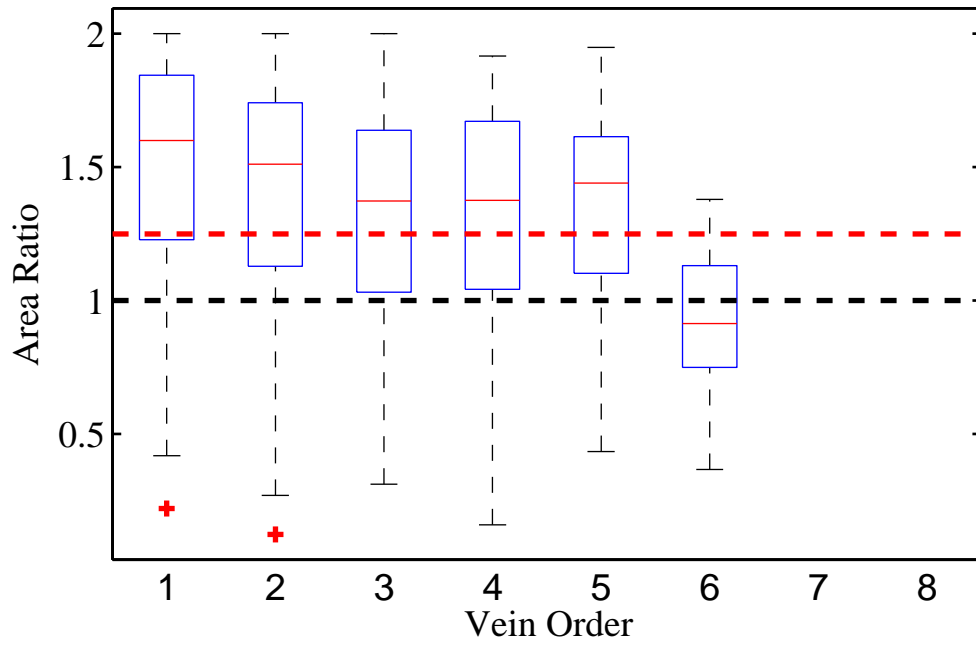



- - - Murrays Law   - - - Elastic Similarity

*Salix commutata* Bebb.

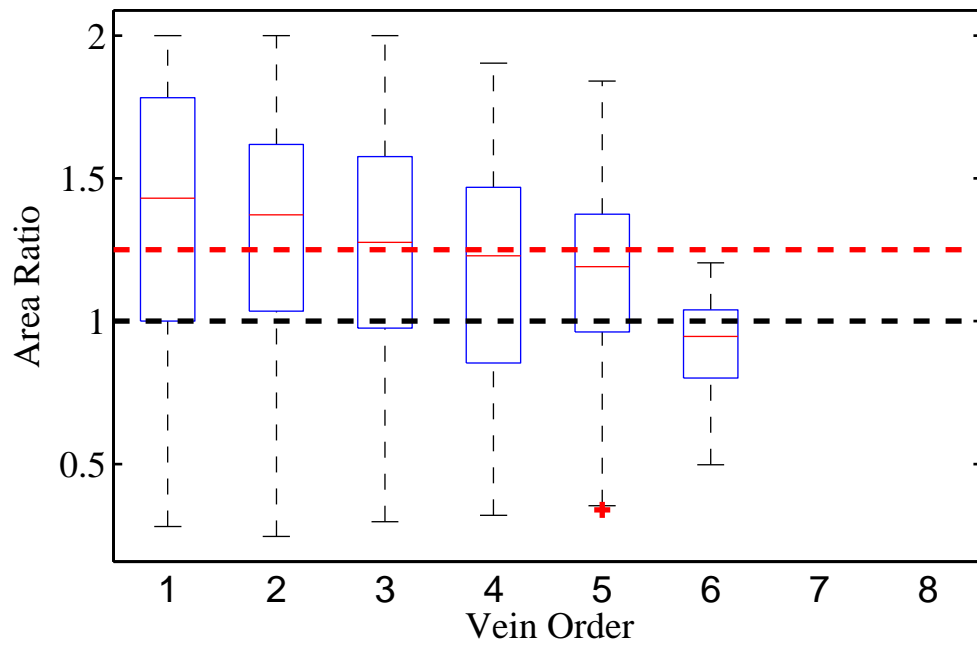

- - - Murrays Law - - - Elastic Similarity

*Salix hebecarpa* Fern.

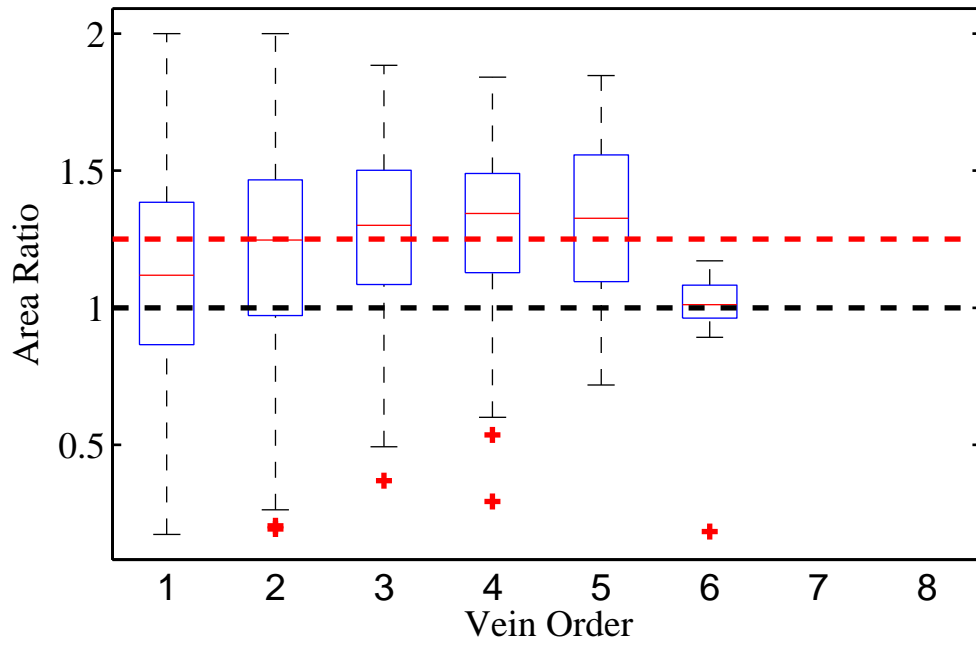

- - - Murrays Law - - - Elastic Similarity

*Schefflera venulosa*

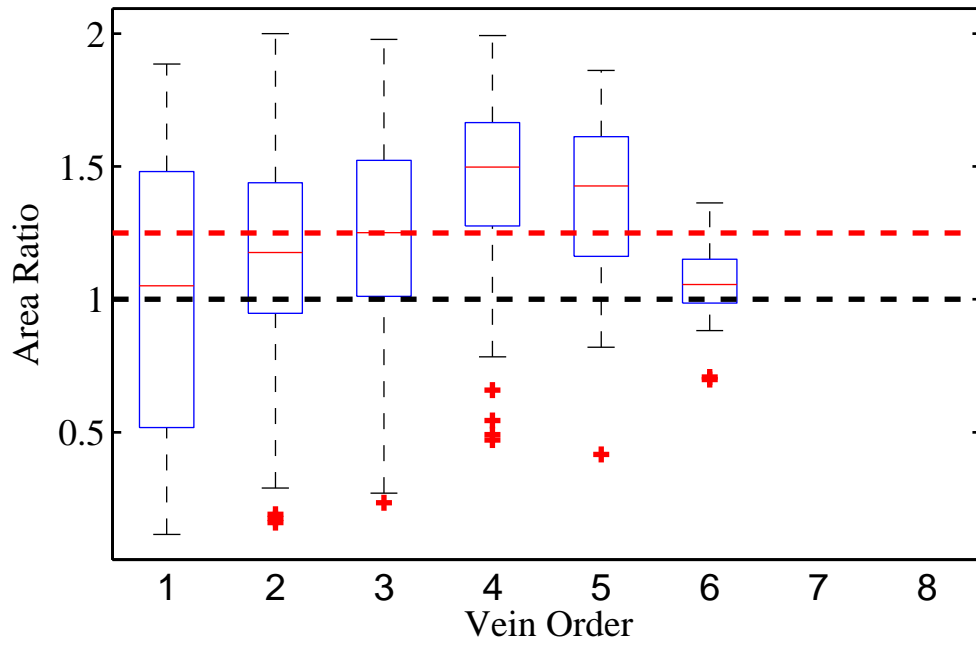

- - - Murrays Law - - - Elastic Similarity

*Gaultheria reticulata* H.B.K.

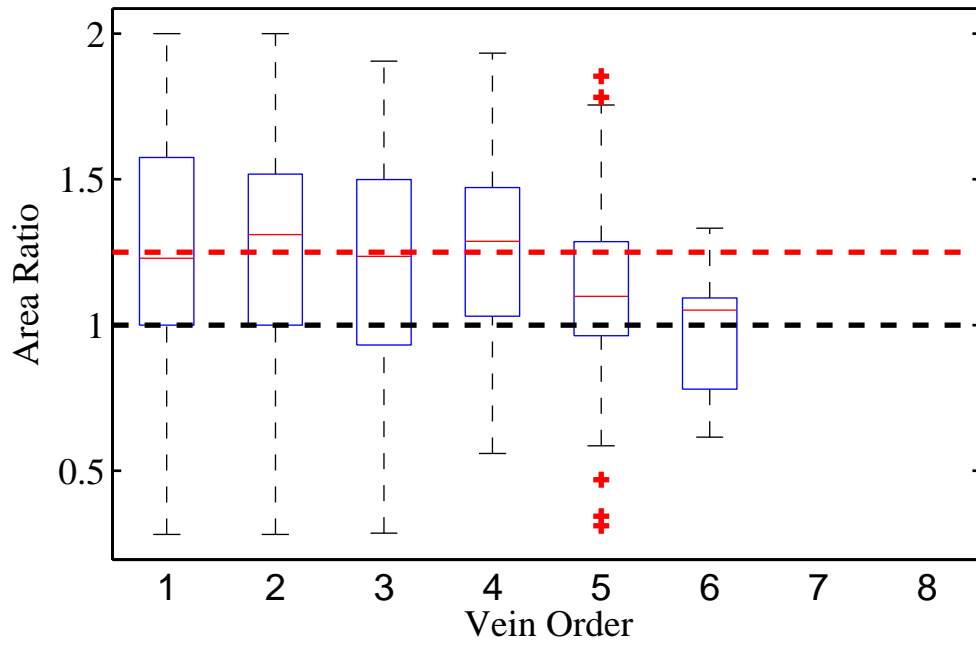

- - - Murrays Law - - - Elastic Similarity

*Gaultheria itatiaiae* Wawra

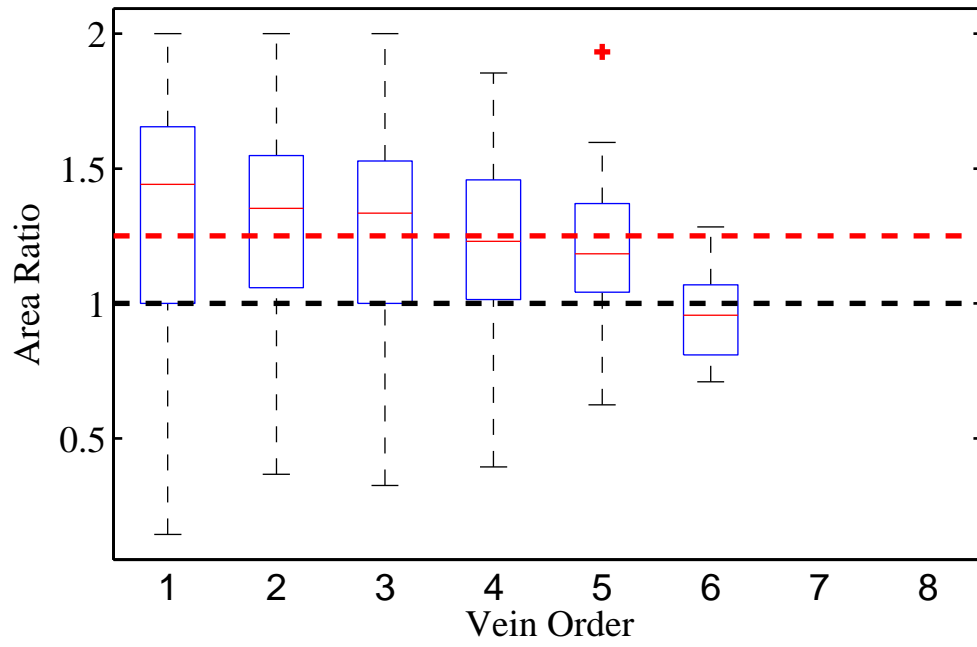

- - - Murrays Law - - - Elastic Similarity

Quercus baronii Skan

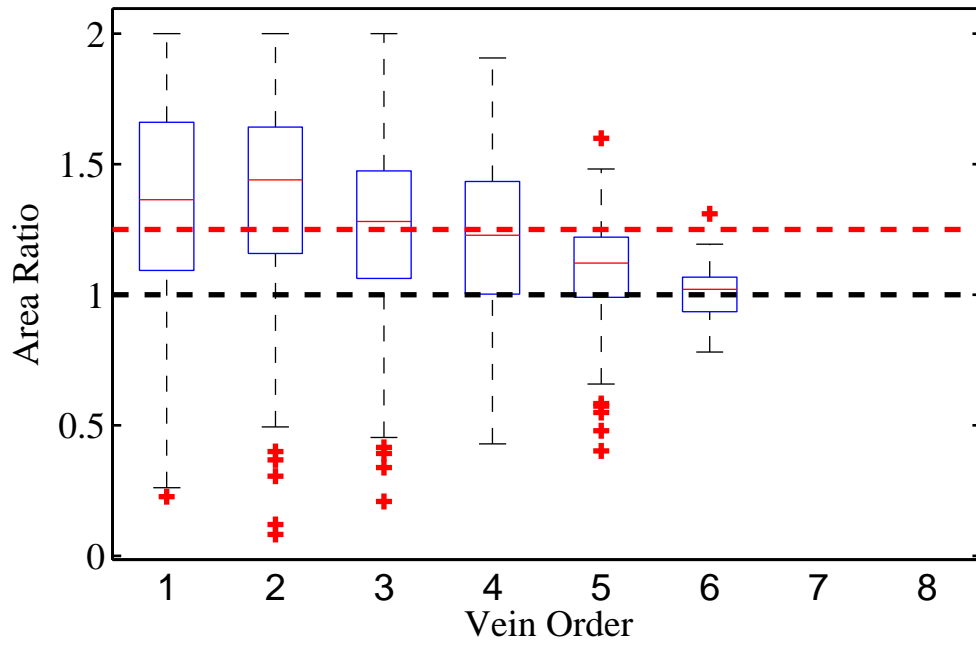

- - - Murrays Law - - - Elastic Similarity

*Elaeocarpus alaternoides* Brong & Gris.

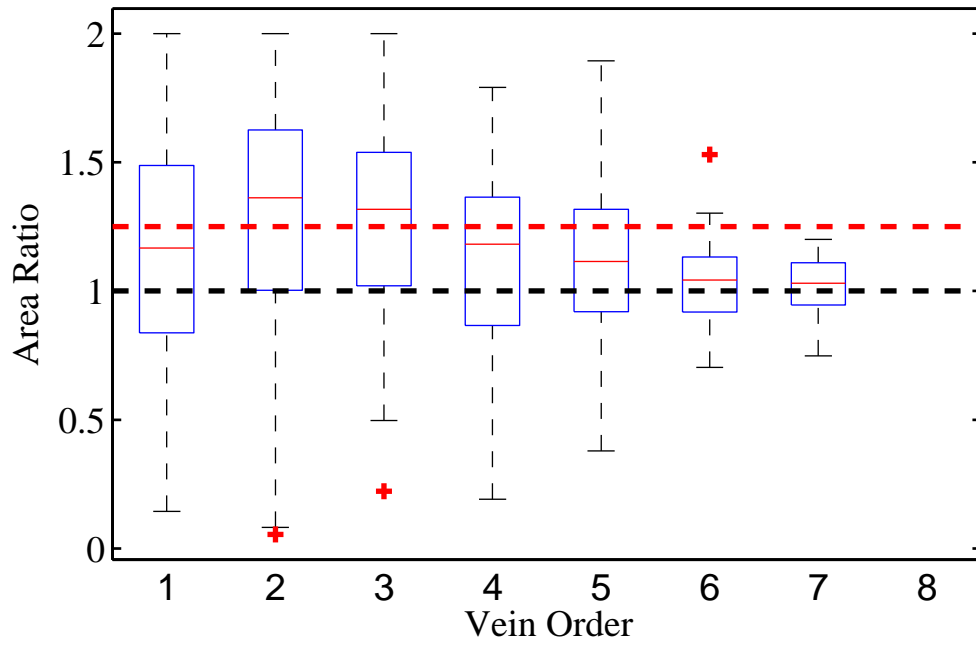

- - - Murrays Law - - - Elastic Similarity

*Galactophora pumila* Monach.

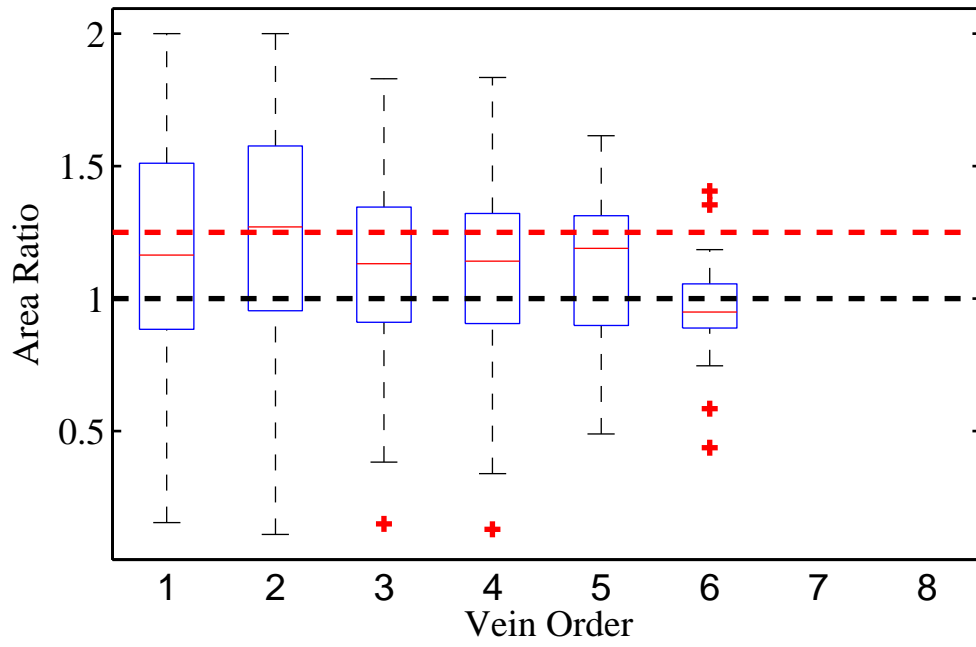



- - - Murrays Law   - - - Elastic Similarity

*Terebinthus longipes* Rose

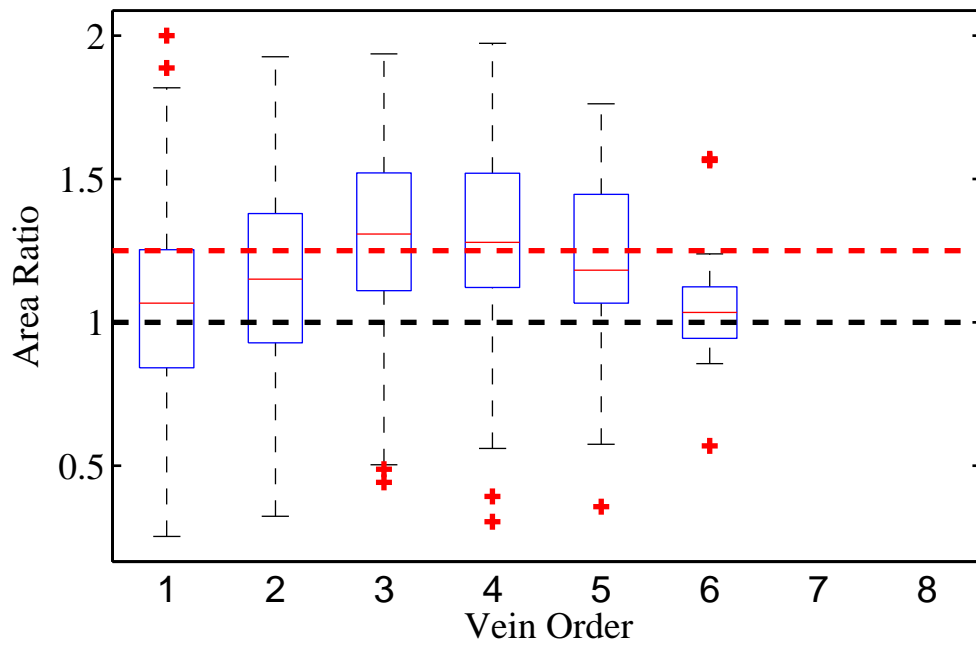

- - - Murrays Law - - - Elastic Similarity

*Garrya salicifolia* Eastw.

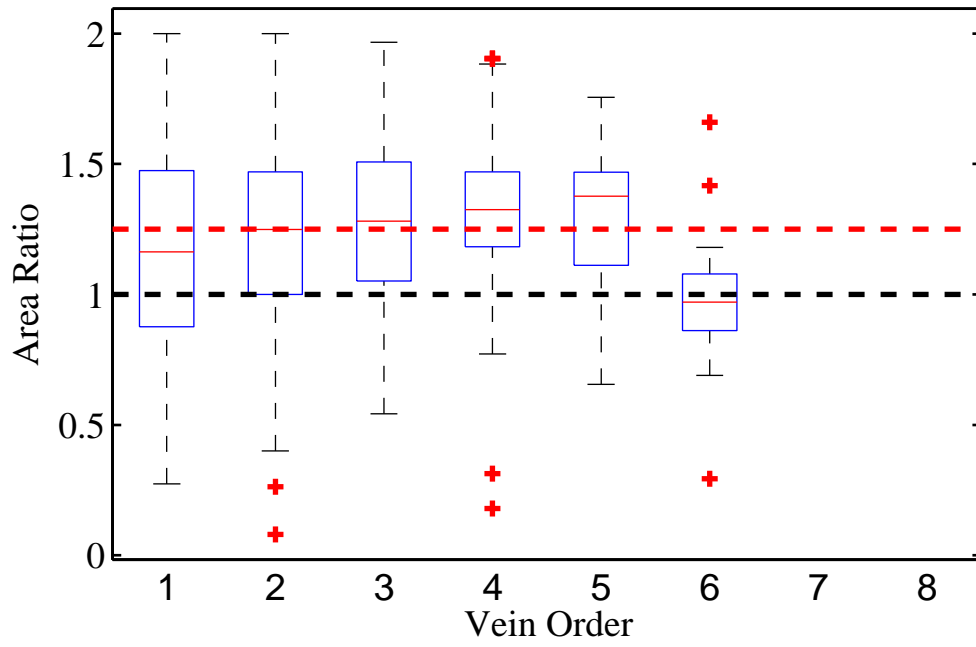

- - - Murrays Law   - - - Elastic Similarity

*Terminalia fatraea* (Poir.) Dc.

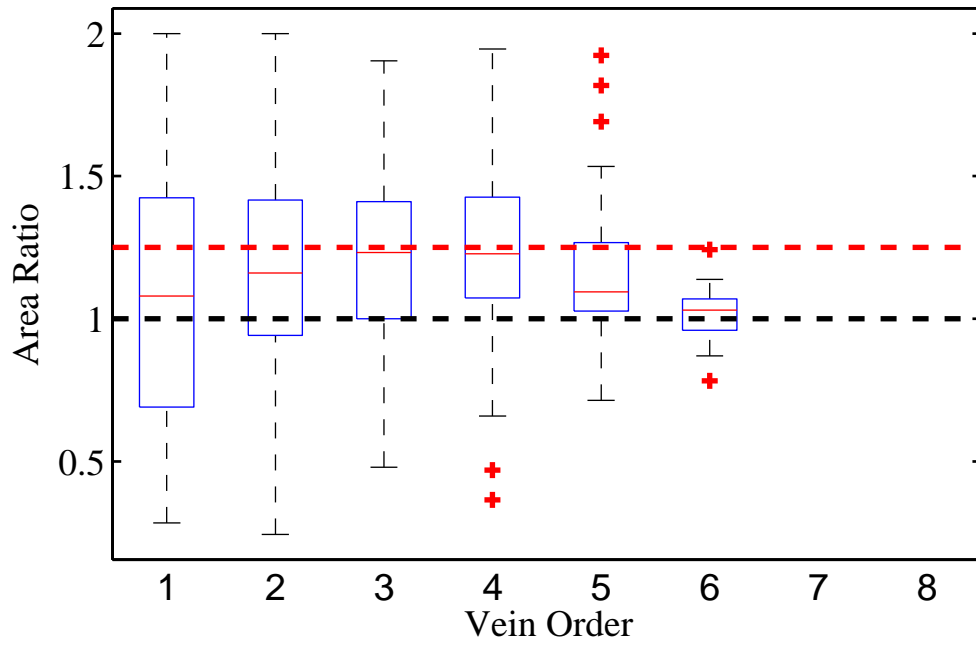

- - - Murrays Law - - - Elastic Similarity

*Cavendishia capitulata* Donn Sm.

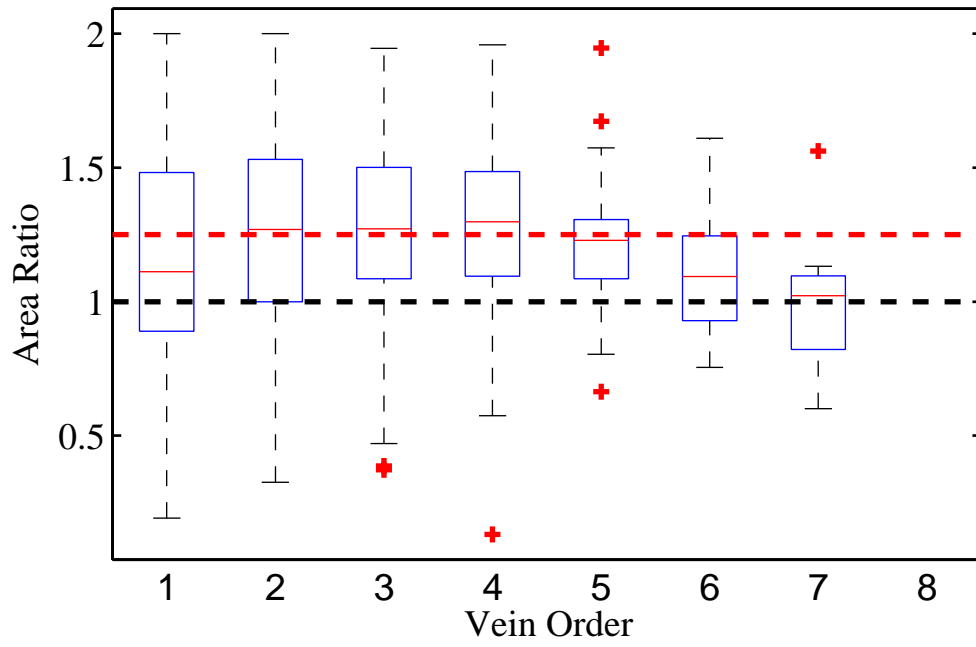

- - - Murrays Law - - - Elastic Similarity

*Salix reticulata* L.

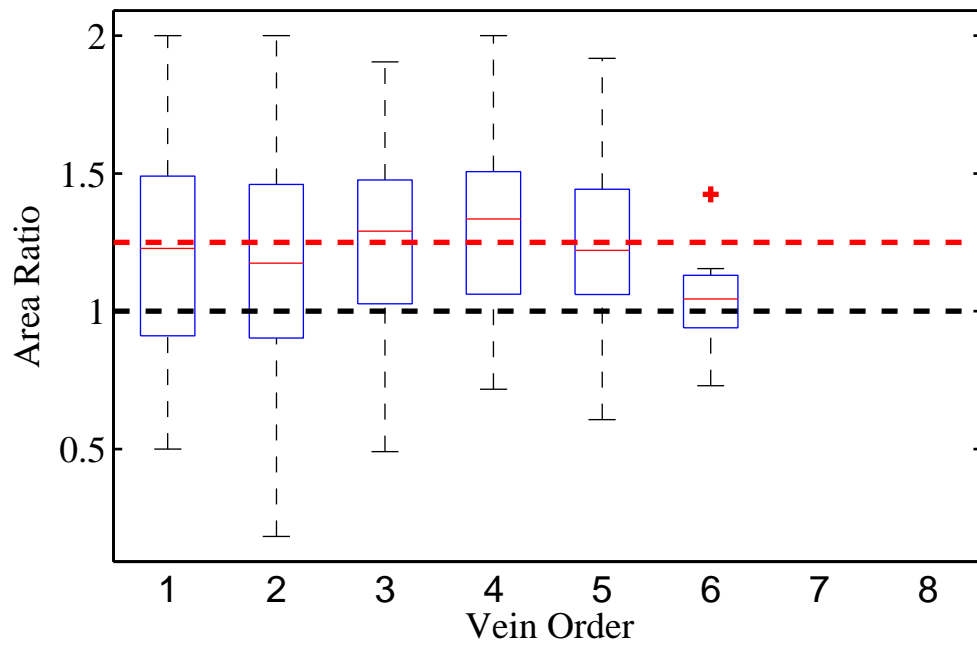

- - - Murrays Law - - - Elastic Similarity

Cavendishia melastomoides (Kloetsch) Hemsl.

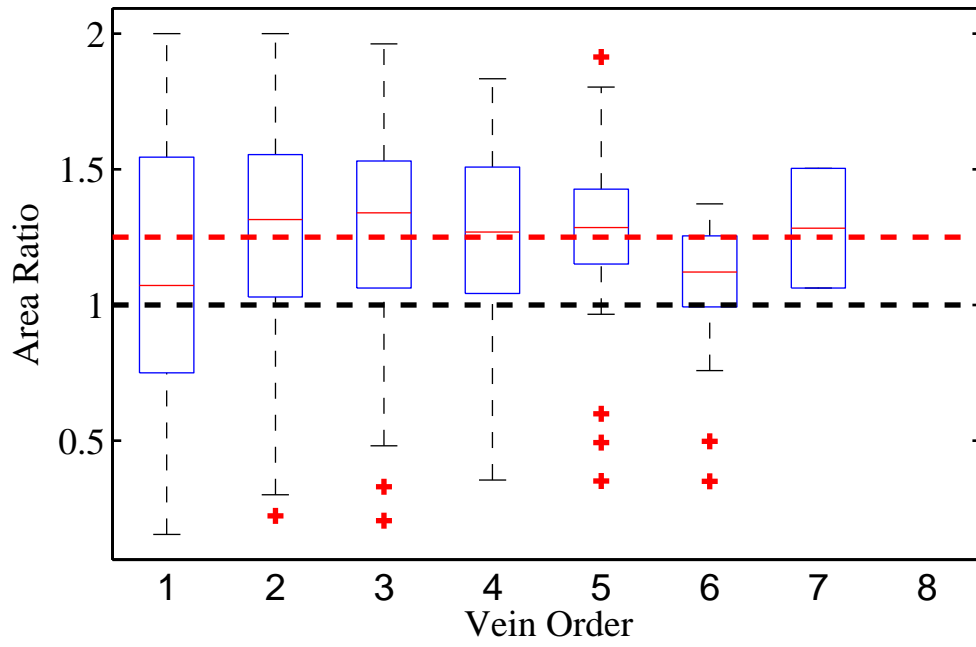

- - - Murrays Law   - - - Elastic Similarity

*Bursera tomentosa* (Jacq.) Tr. & Pl.

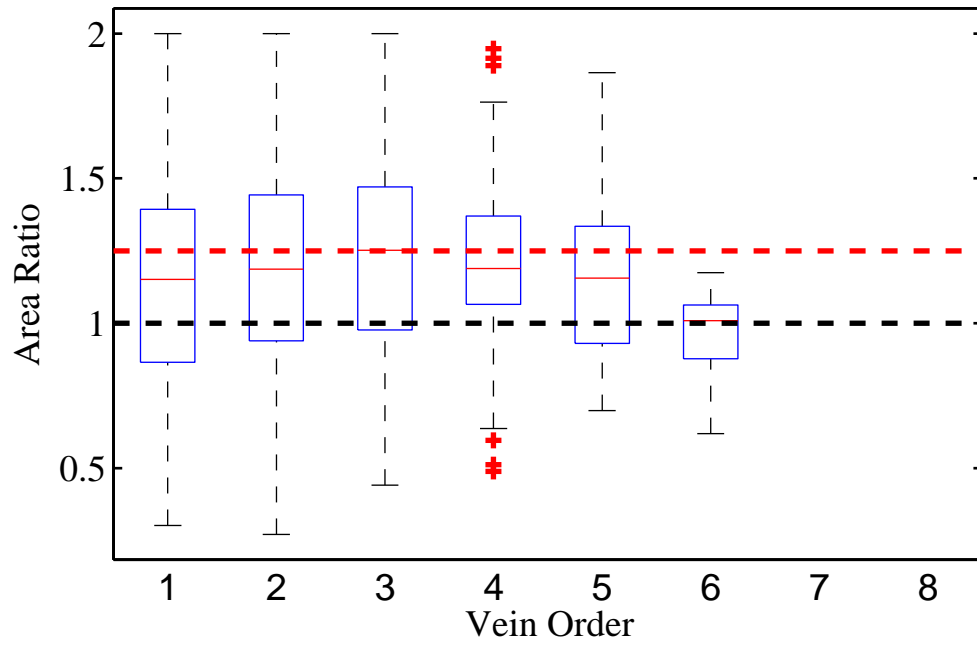

- - - Murrays Law - - - Elastic Similarity

*Goodallia guianensis*

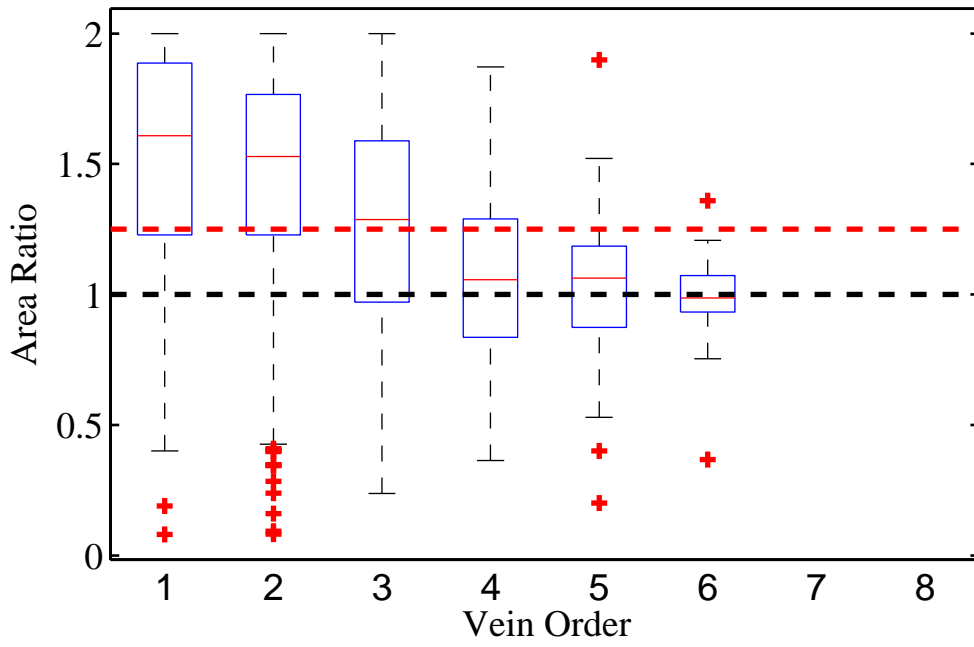



- - - Murrays Law - - - Elastic Similarity

Talauma candollei Bl.

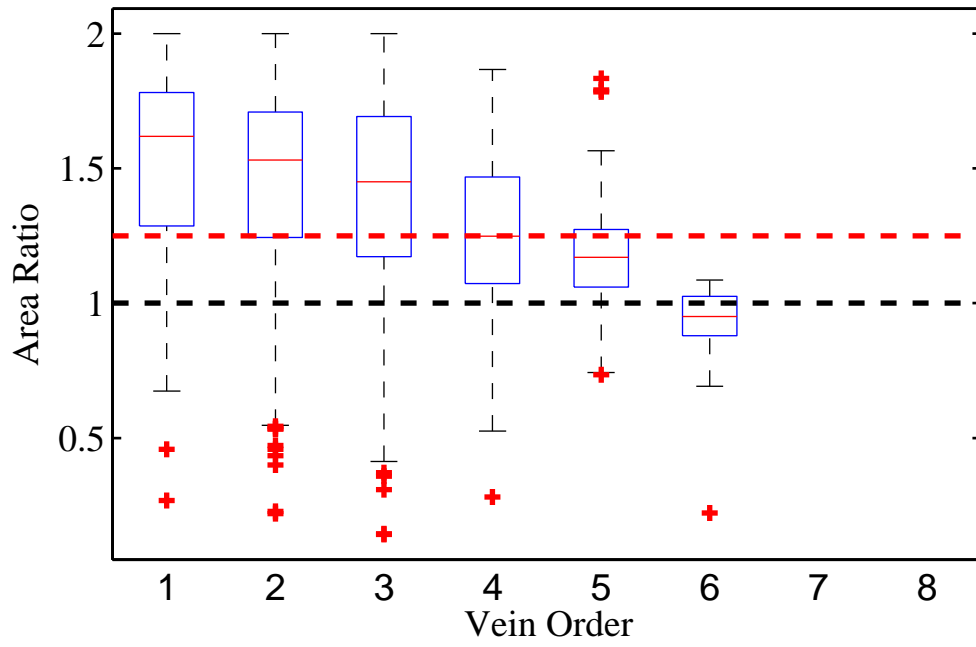

- - - Murrays Law - - - Elastic Similarity

*Asimina longifolia* Kral var. *spatulata* Kral

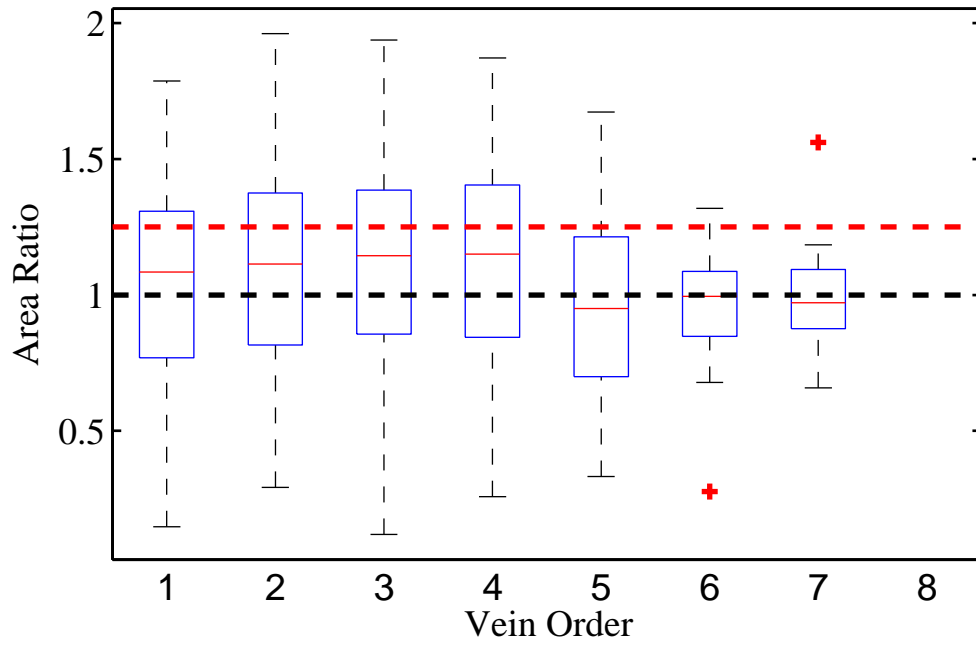

- - - Murrays Law - - - Elastic Similarity

Luehea tessmannii Burrett

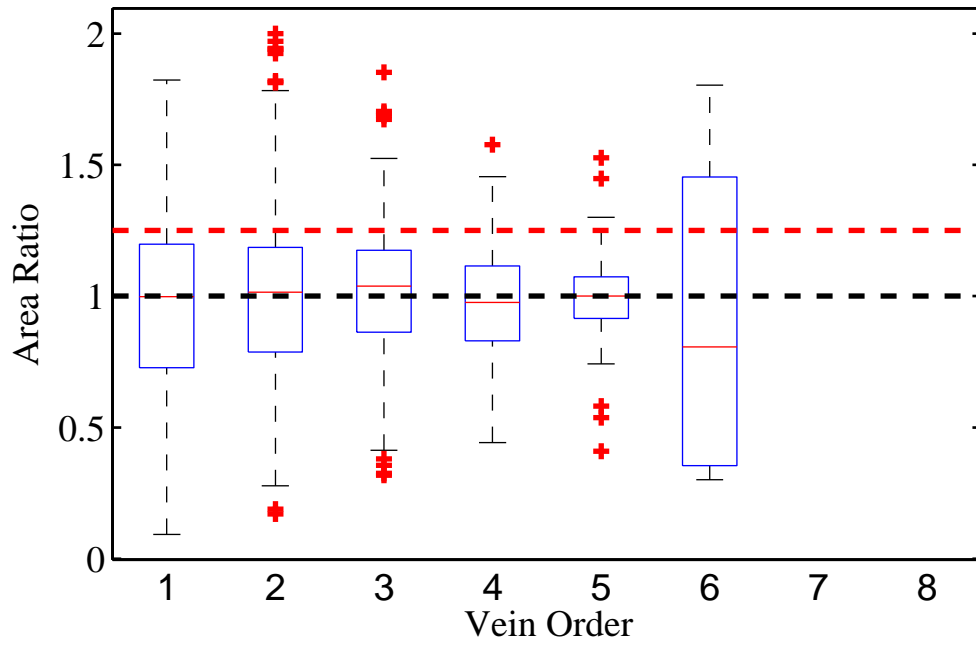

- - - Murrays Law - - - Elastic Similarity

*Rosa microcarpa* Lindl.

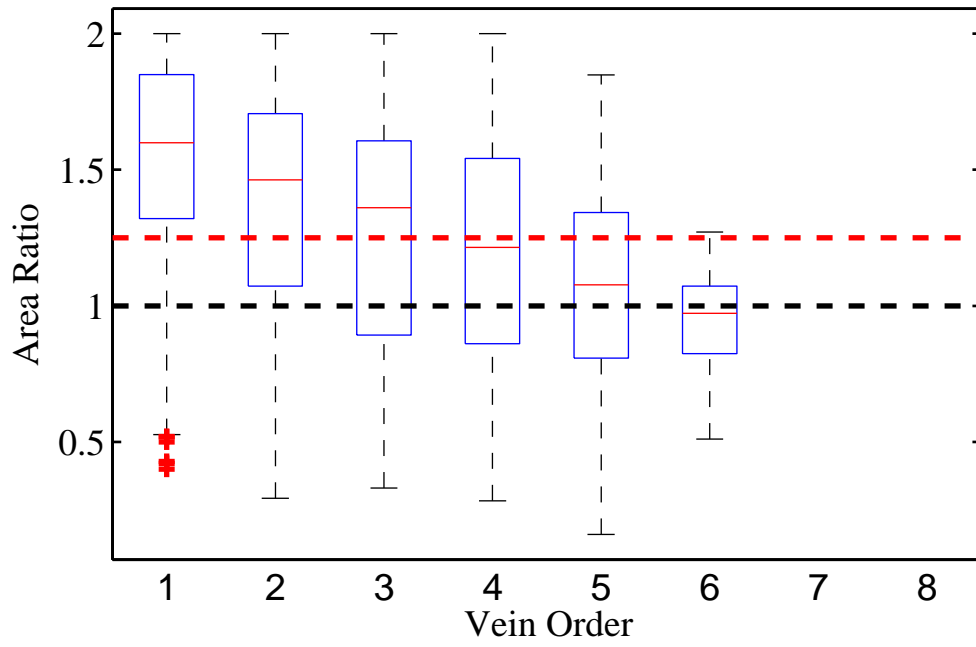

- - - Murrays Law - - - Elastic Similarity

*Salix phylicifolia* L. X *repens* L.

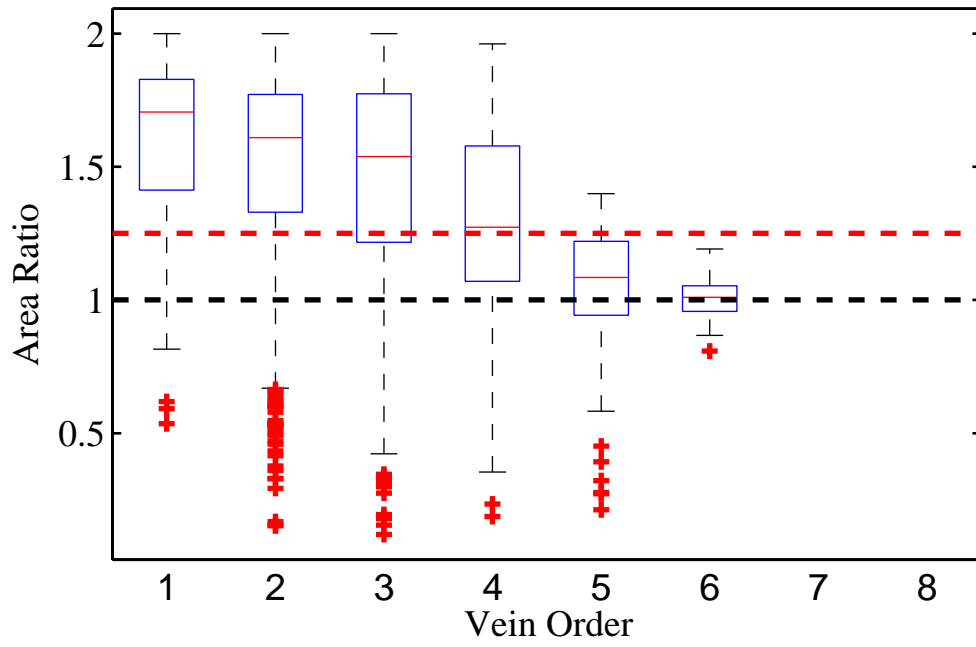

- - - Murrays Law - - - Elastic Similarity

*Rhodosphaera rhodanthera* Engl.

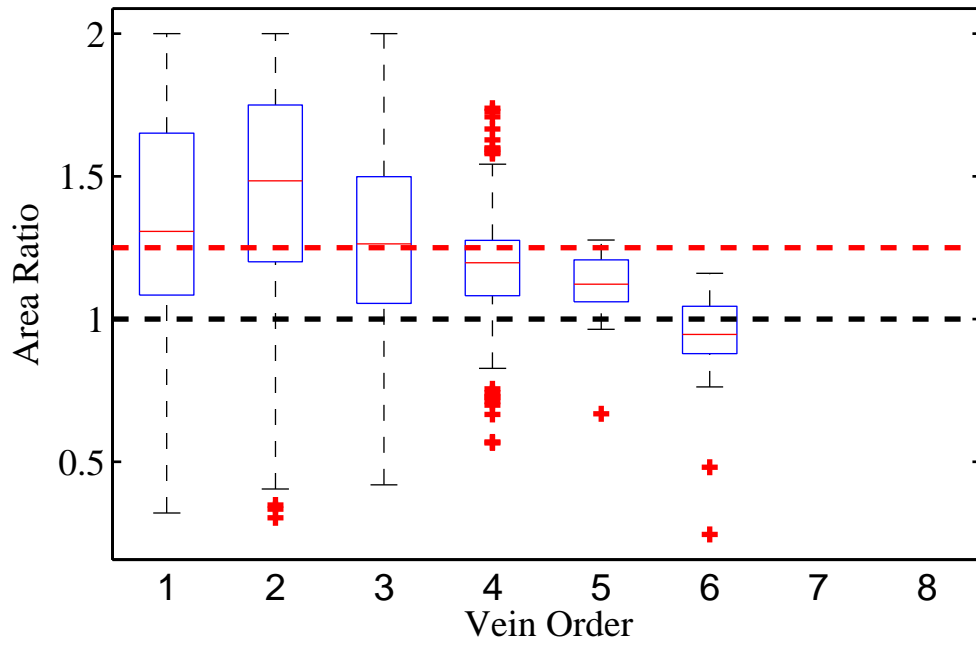

- - - Murrays Law   - - - Elastic Similarity

*Casearia arborea* (L. Rich) Urb.

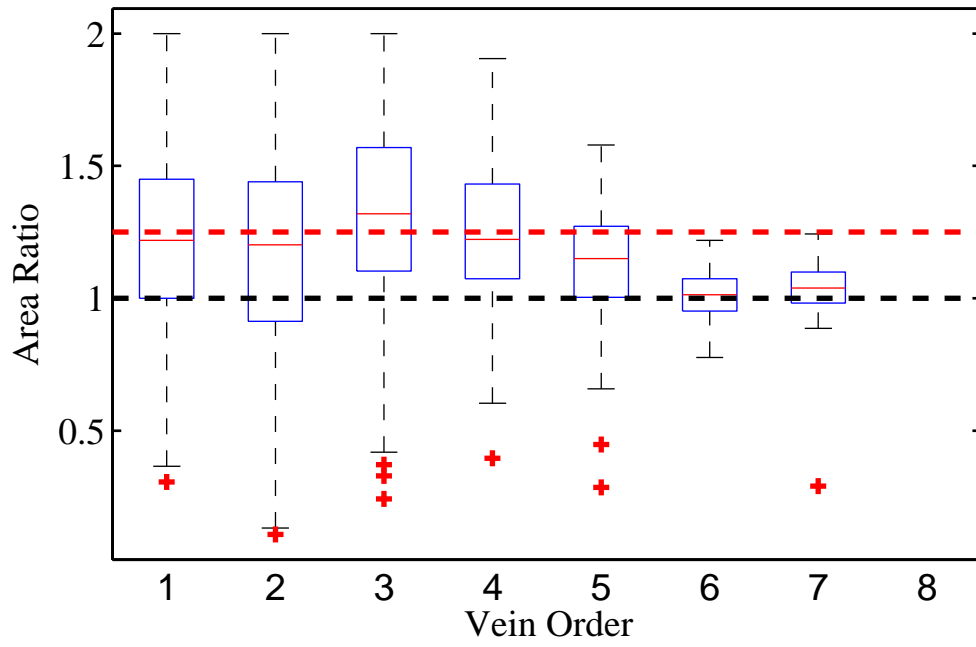

- - - Murrays Law - - - Elastic Similarity

*Craibiodendron? sclerantha* P. Dop

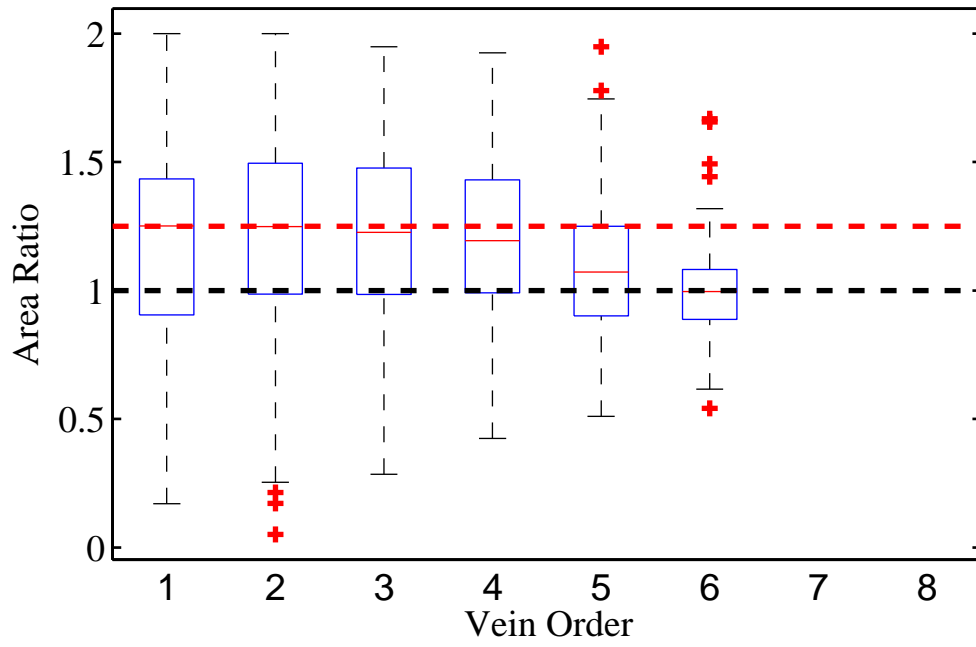



- - - Murrays Law - - - Elastic Similarity

Weinmannia elliptica H.B.K.

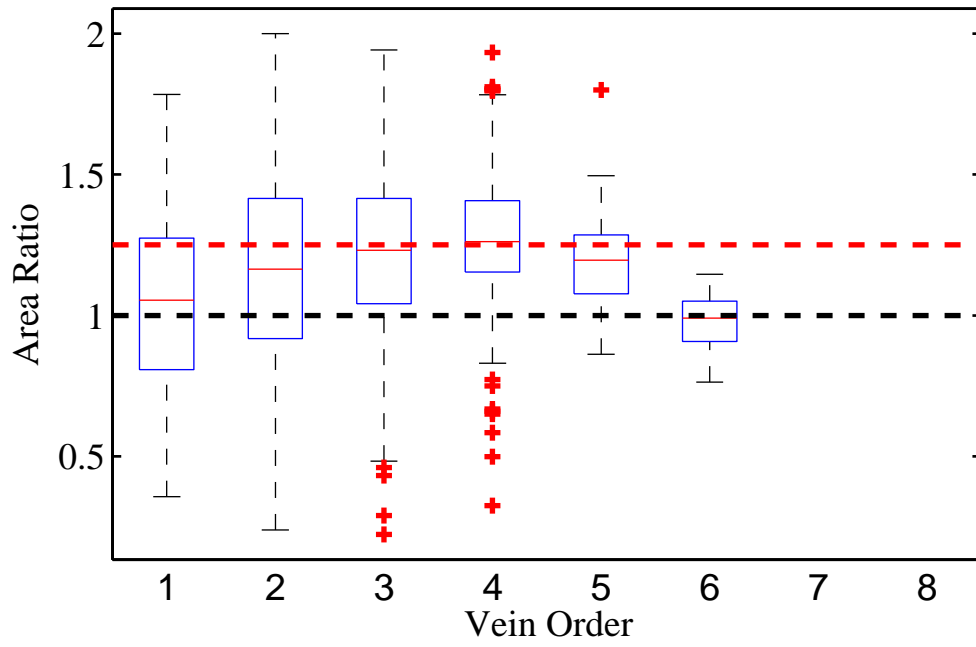

- - - Murrays Law - - - Elastic Similarity

*Brackenridgea zanguebarica* Oliv.

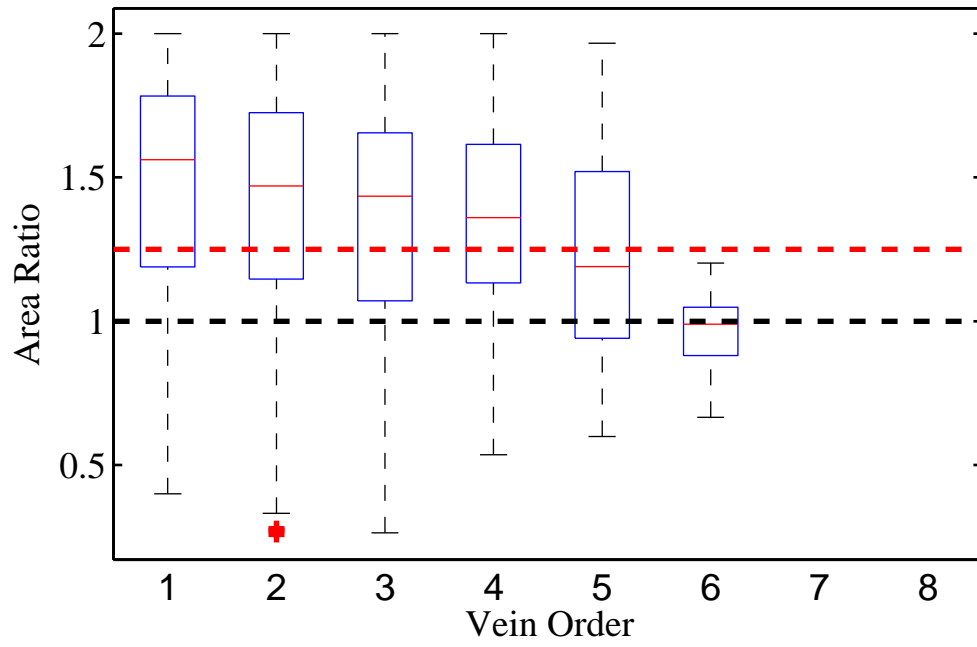

- - - Murrays Law   - - - Elastic Similarity

*Clematis pitcheri* (T. & G.) Britt.

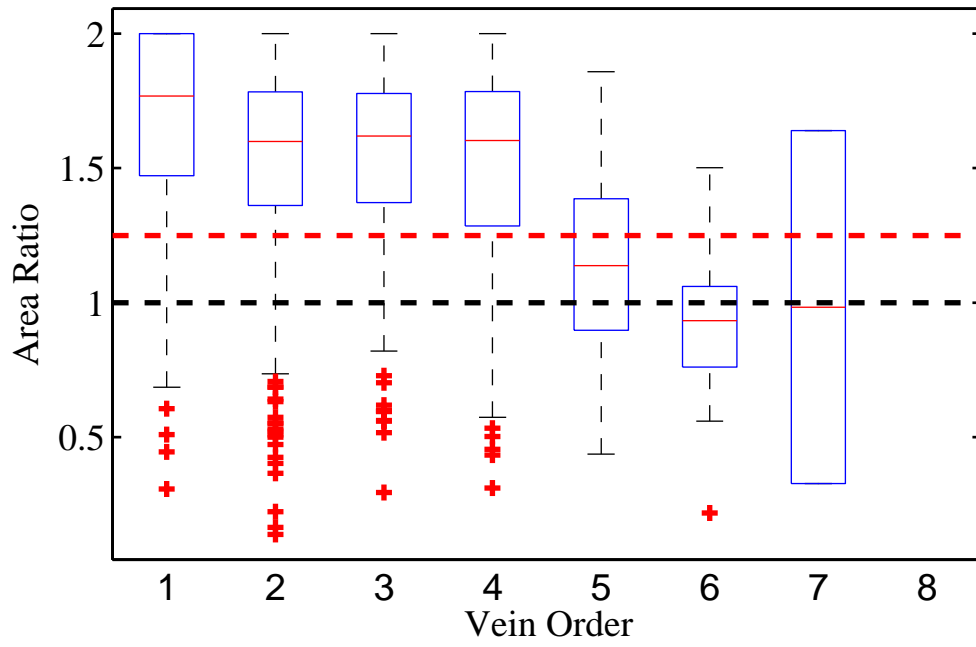

- - - Murrays Law - - - Elastic Similarity

*Tryphostemma sandersoni* Harv.

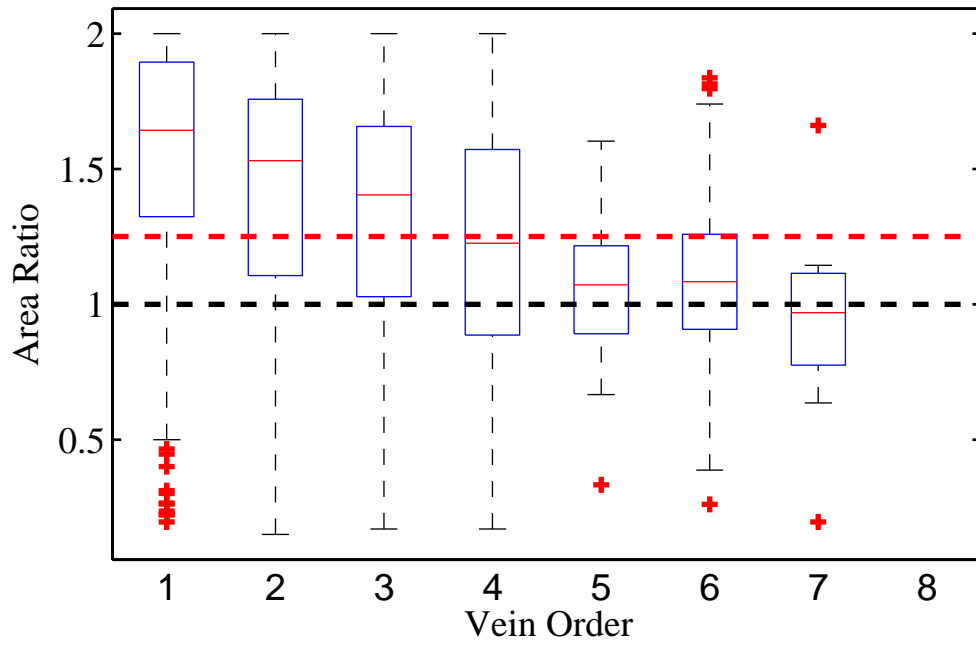

- - - Murrays Law - - - Elastic Similarity

*Celtis bungeana*

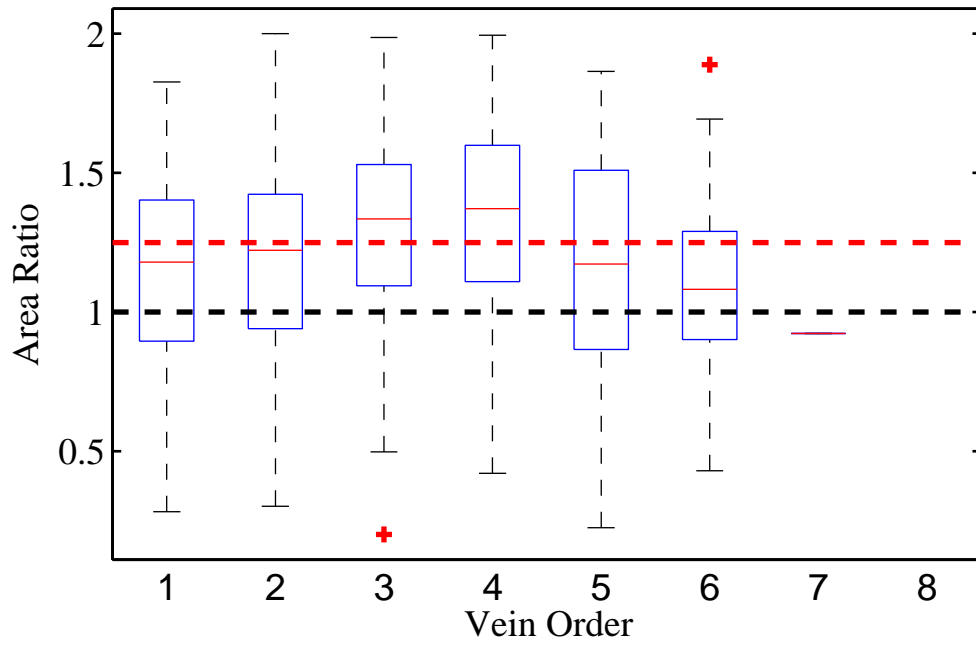

- - - Murrays Law - - - Elastic Similarity

*Celtis berlandieri* Klotzsch.

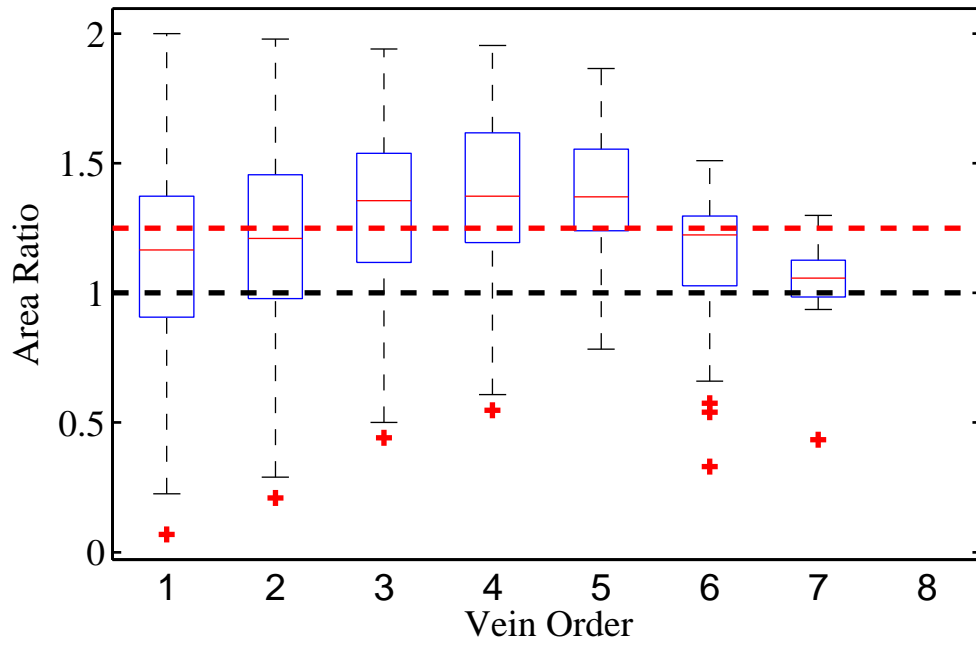

- - - Murrays Law - - - Elastic Similarity

Malea pilosa Lundell

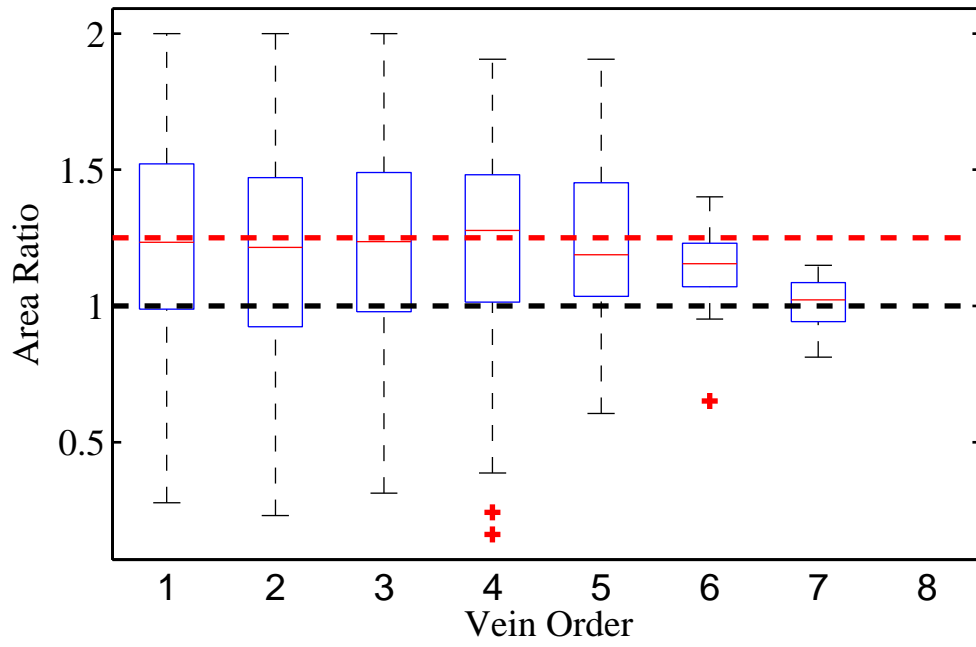

- - - Murrays Law - - - Elastic Similarity

*Findlaya apophysata* Hook. F.

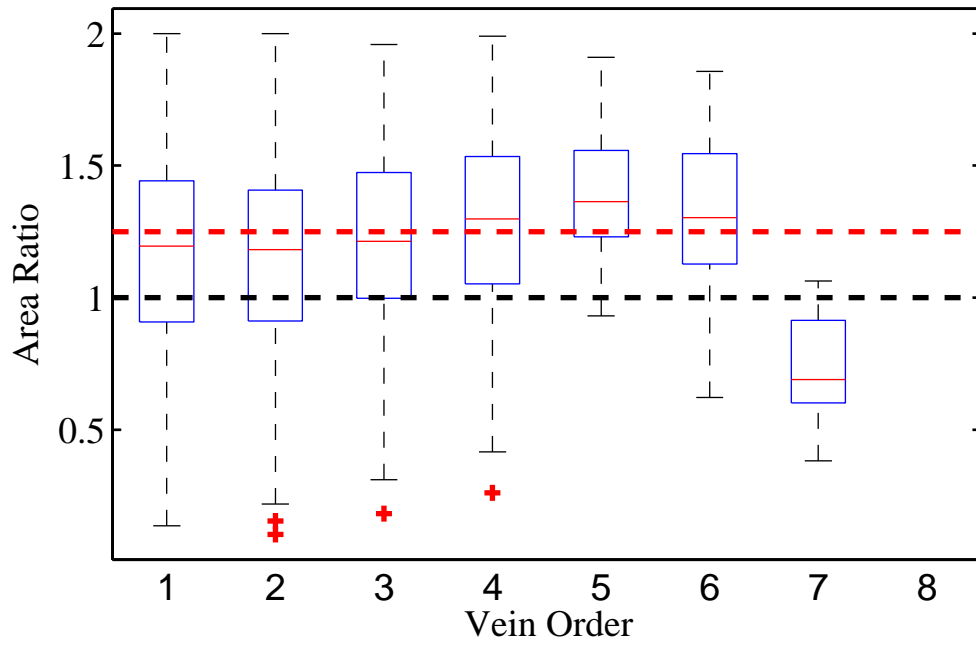



- - - Murrays Law - - - Elastic Similarity

*Quercus castanea* Nee

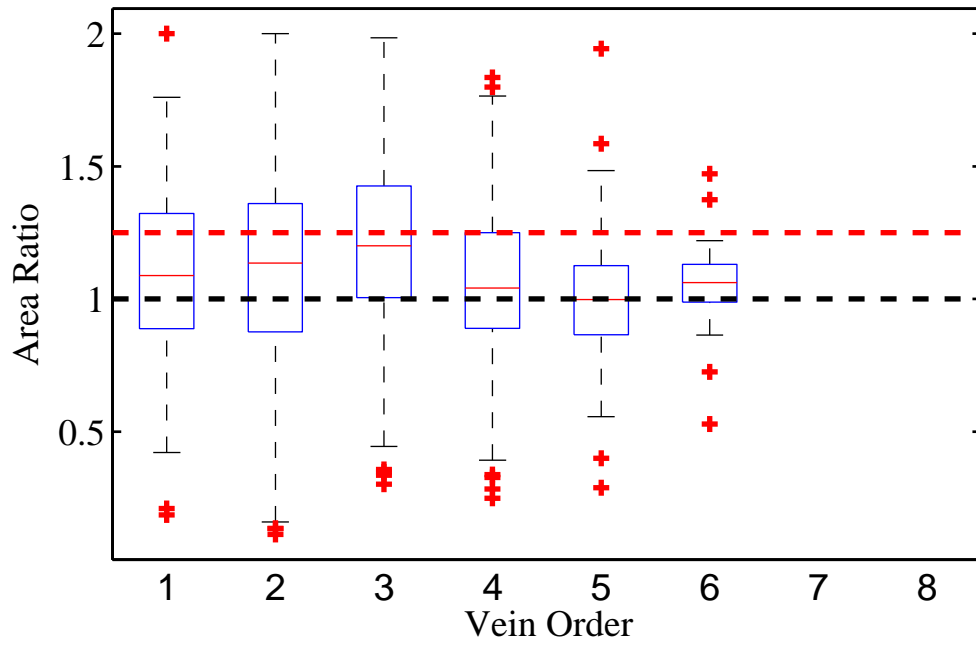

- - - Murrays Law    - - - Elastic Similarity

*Clematis reticulata* Walt.

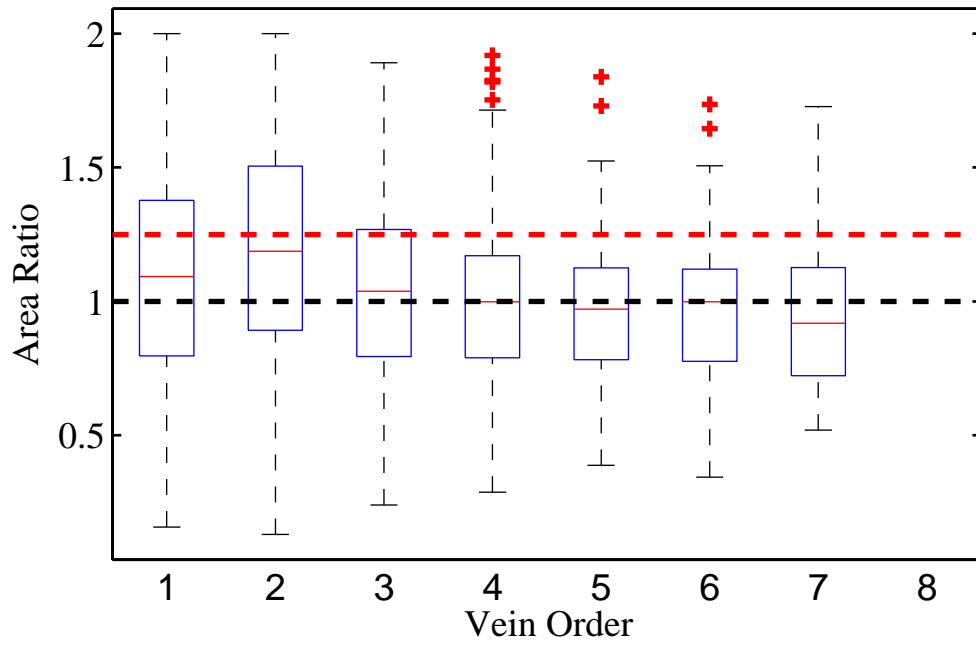

- - - Murrays Law   - - - Elastic Similarity

*Betula rockii* (Rehd.) Jans.

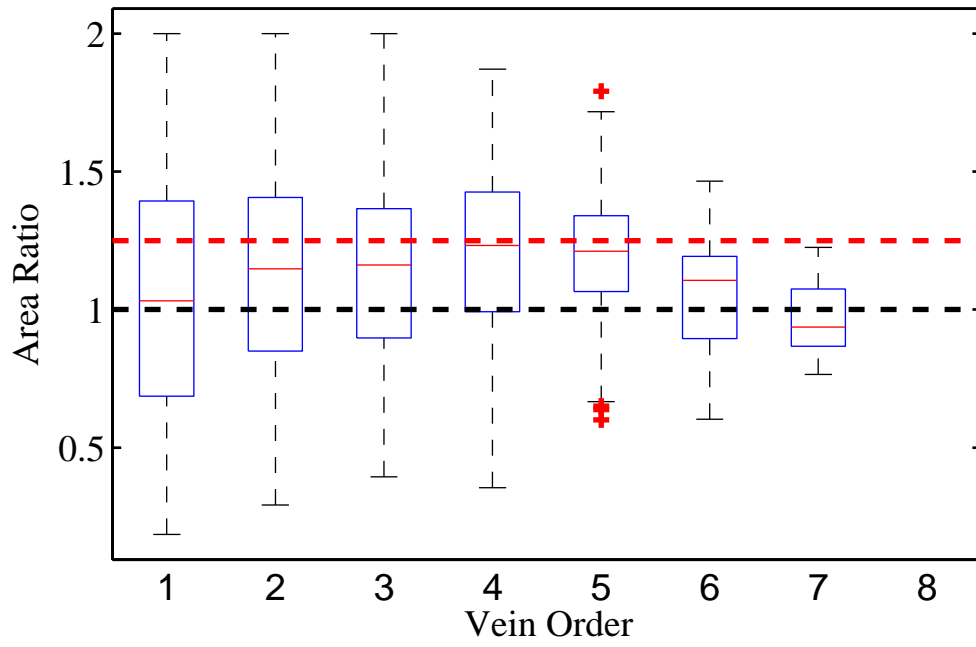

- - - Murrays Law - - - Elastic Similarity

*Salix aurita* L.

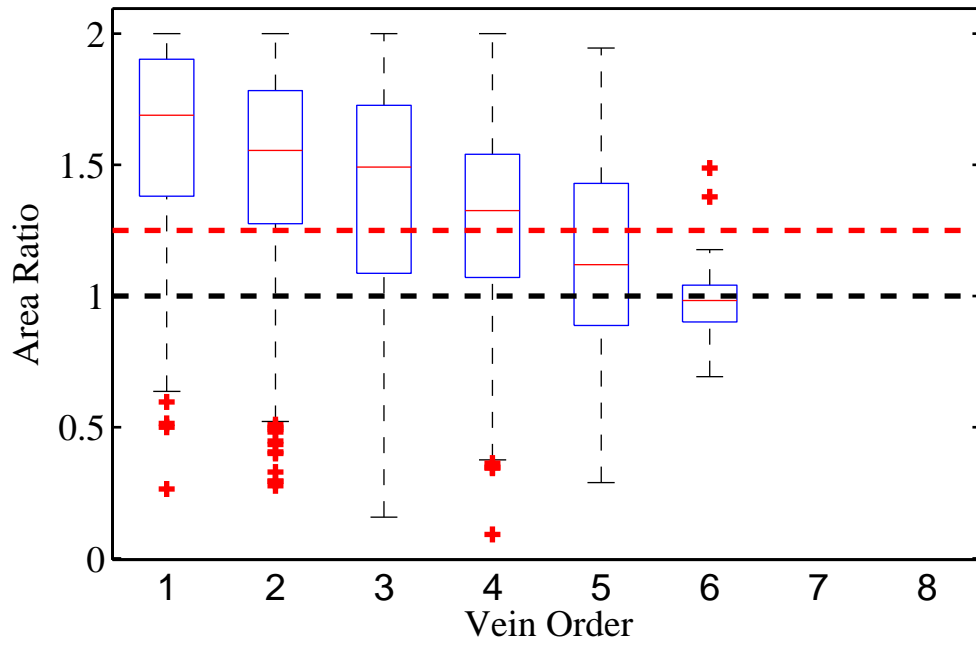

- - - Murrays Law - - - Elastic Similarity

*Vancouveria chrysantha* Greene

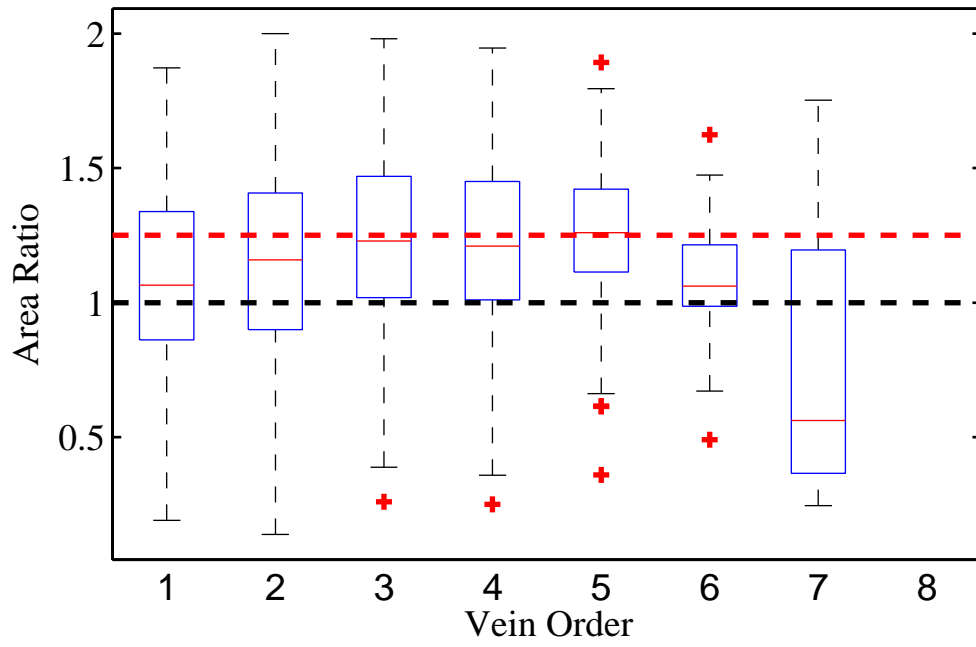

- - - Murrays Law   - - - Elastic Similarity

*Quercus glaucoides* Schottky

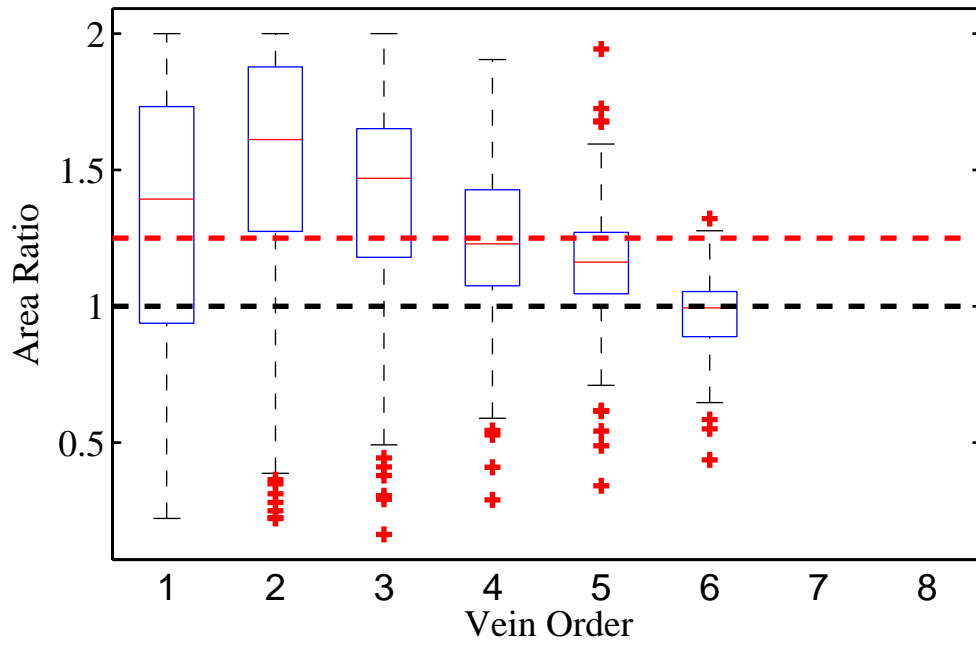

- - - Murrays Law - - - Elastic Similarity

*Quercus grisea* Liebm.

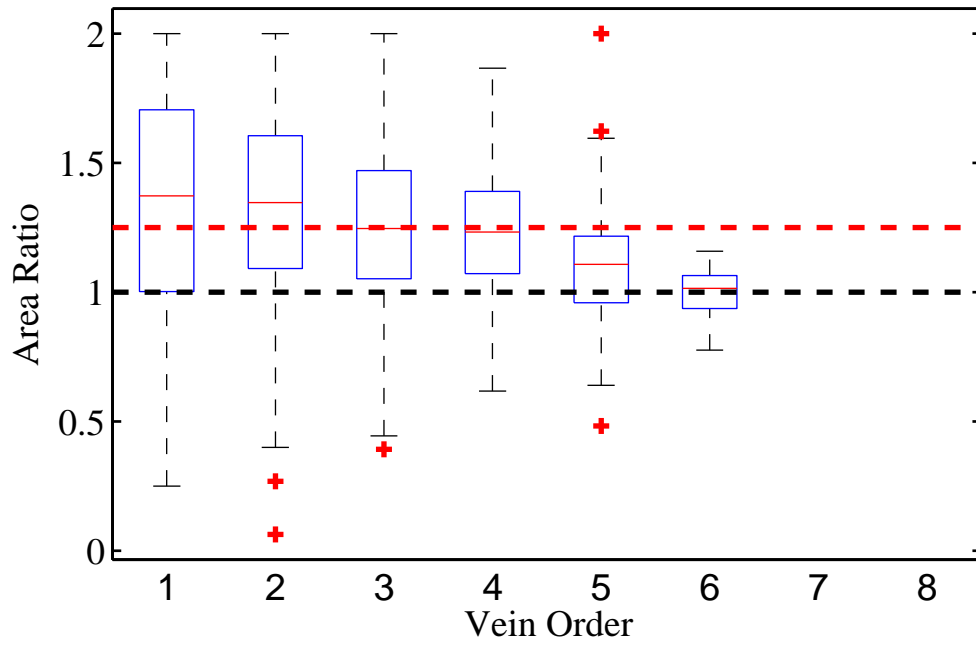

- - - Murrays Law - - - Elastic Similarity

Grangeria borbonica

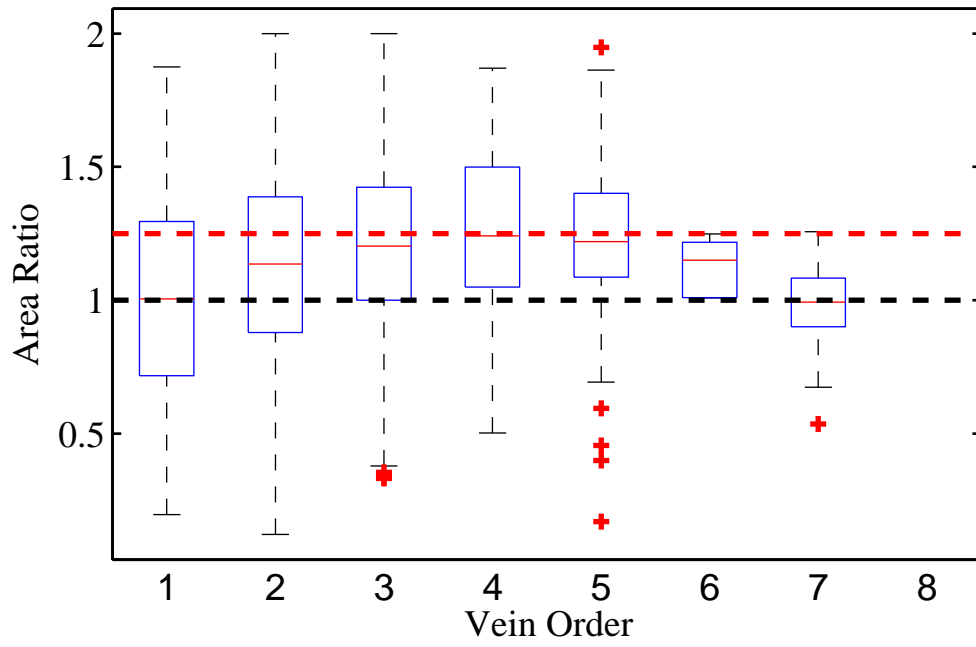



- - - Murrays Law   - - - Elastic Similarity

*Securidaca rivinifolia* St. Hil. var. *parvifolia* A.W. Benn.

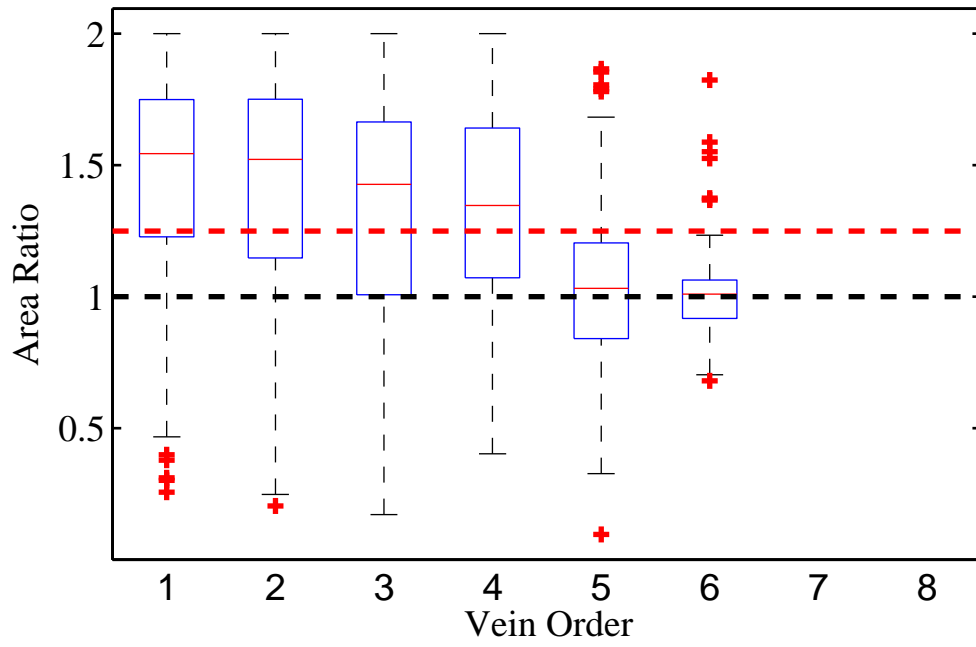

- - - Murrays Law - - - Elastic Similarity

*Brickellia kellermanii* Greenm.

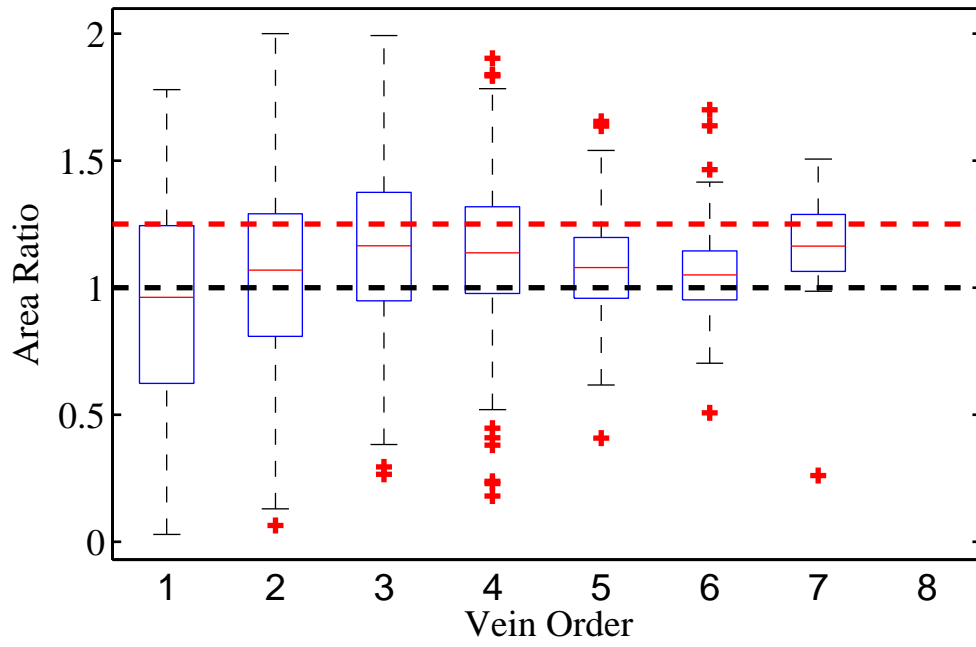

- - - Murrays Law - - - Elastic Similarity

*Sebastiania edwalliana* Pax & Hoff. var. *vestita* Chod & Hassl.

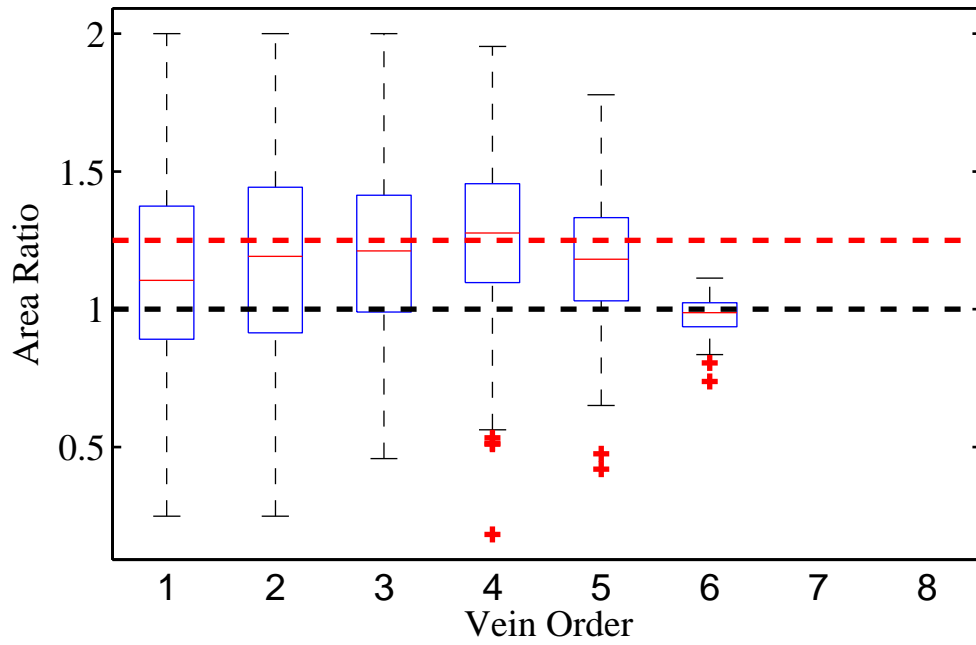

- - - Murrays Law   - - - Elastic Similarity

*Xylosma congestum* (Lour.) Merr.

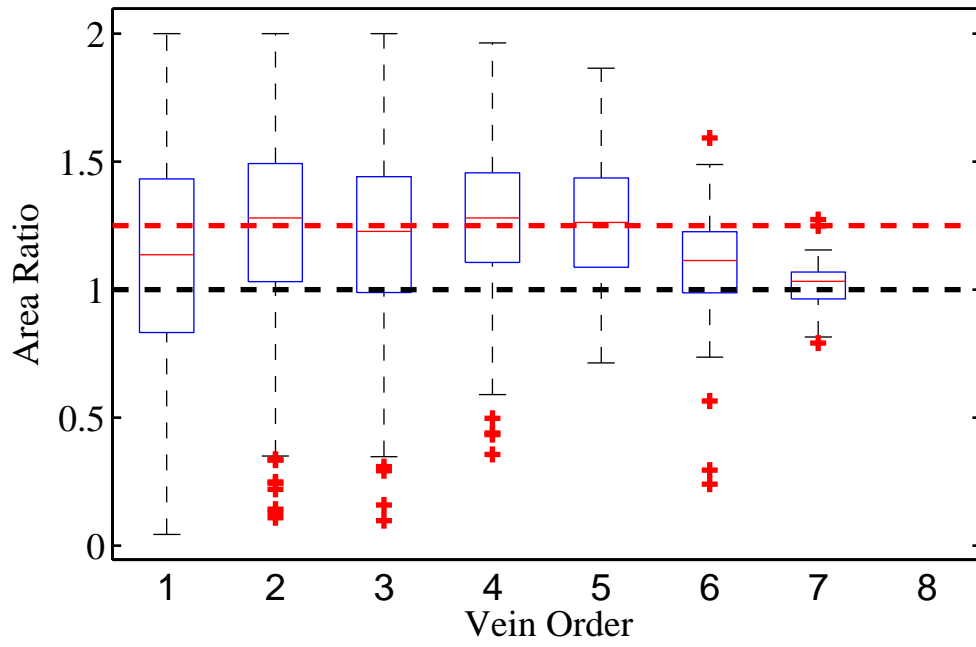

- - - Murrays Law    - - - Elastic Similarity

*Drimys hatamensis* (Becc.) A.C. Sm.

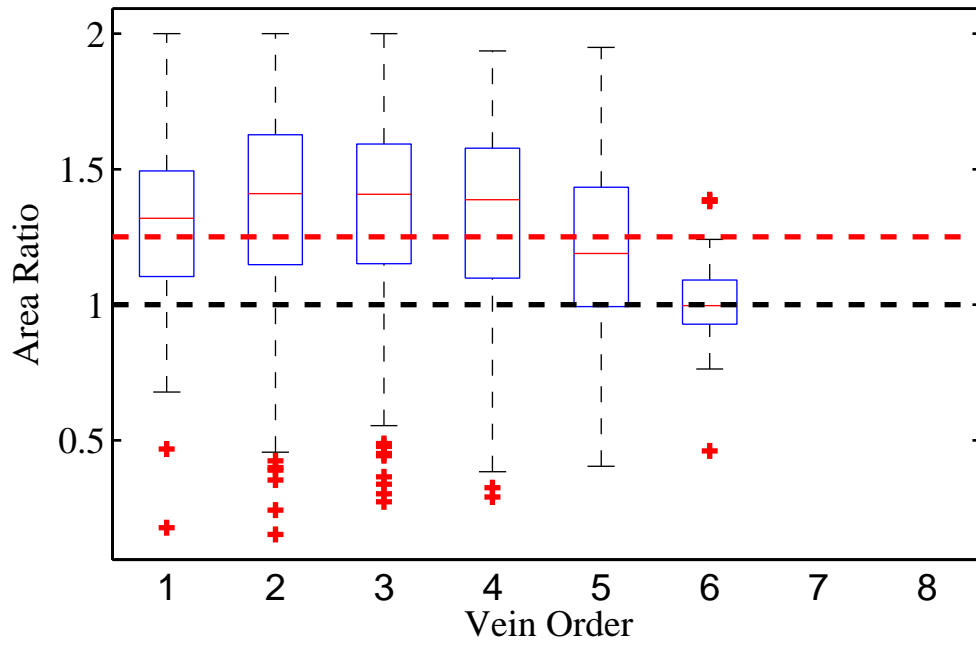

- - - Murrays Law - - - Elastic Similarity

*Trema micrantha* (L.) Blume

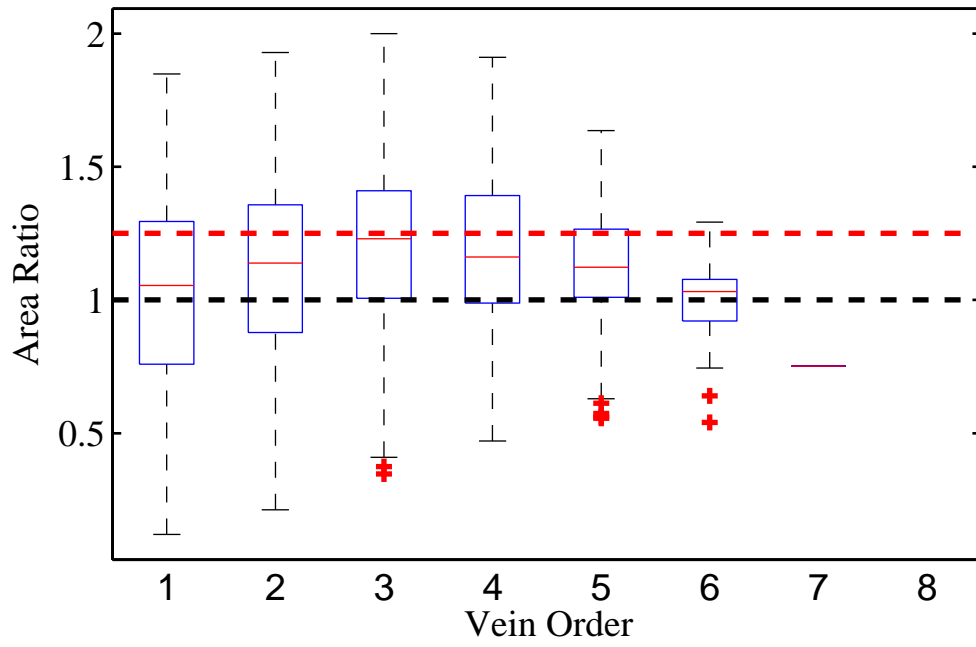

- - - Murrays Law - - - Elastic Similarity

*Psorospermum androsaemifolium* Bak.

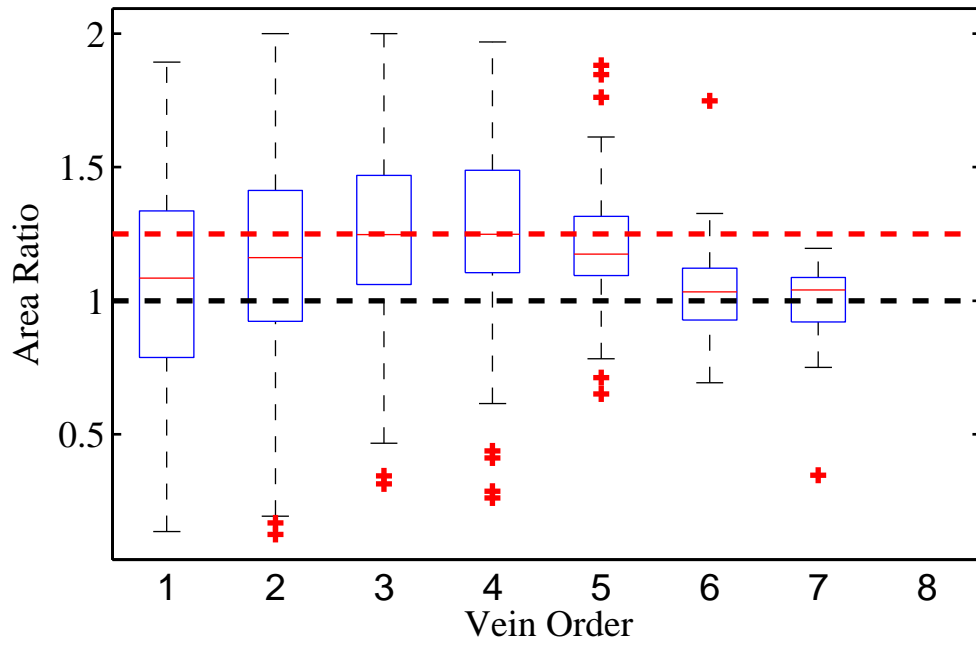

- - - Murrays Law - - - Elastic Similarity

*Betula pumila* L.

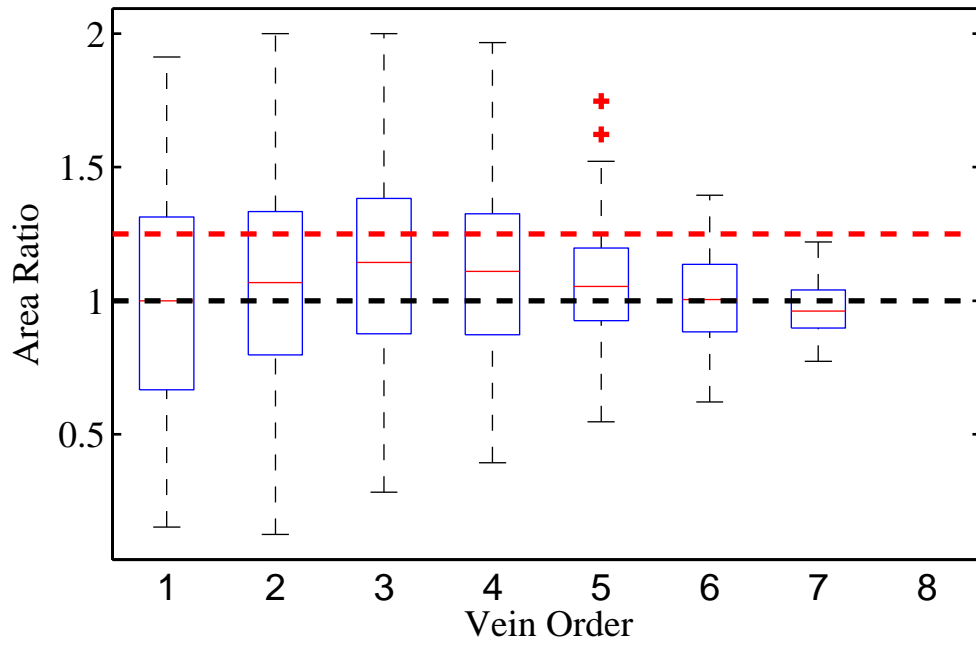



- - - Murrays Law - - - Elastic Similarity

Quercus emoryi Torr

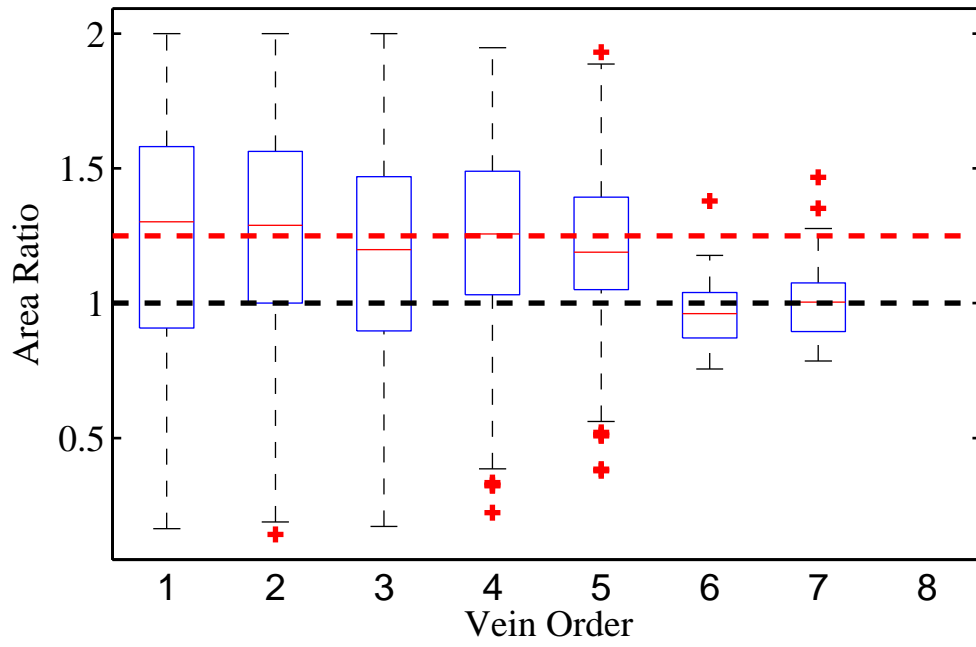

- - - Murrays Law - - - Elastic Similarity

*Rhoicissus rhomboidea* (E. Mey.) Planch

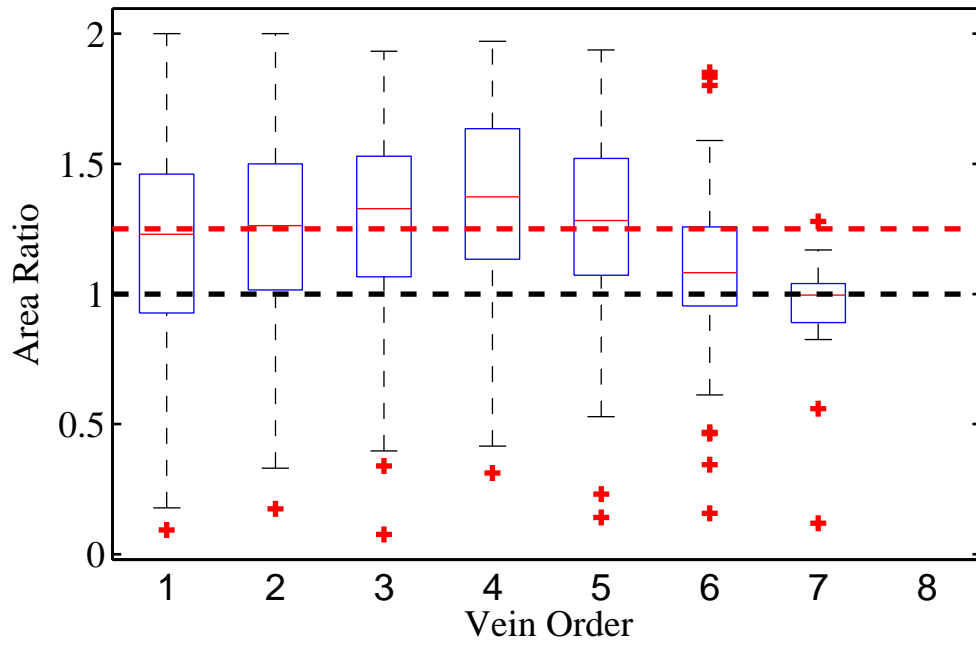

- - - Murrays Law - - - Elastic Similarity

*Celtis labilis* Schneid.

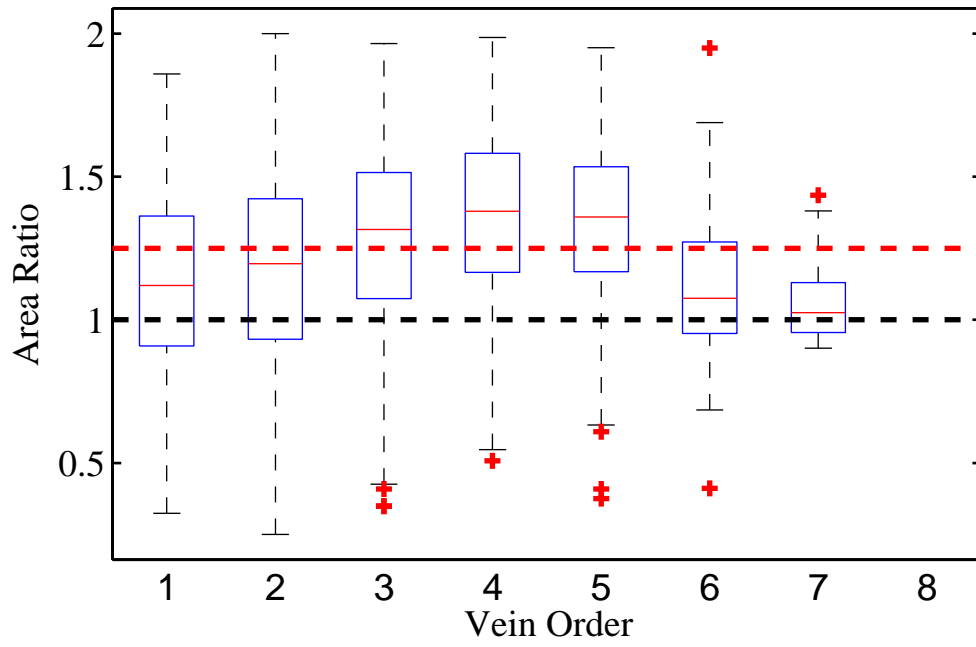

- - - Murrays Law - - - Elastic Similarity

Davilla elliptica St. Hil.

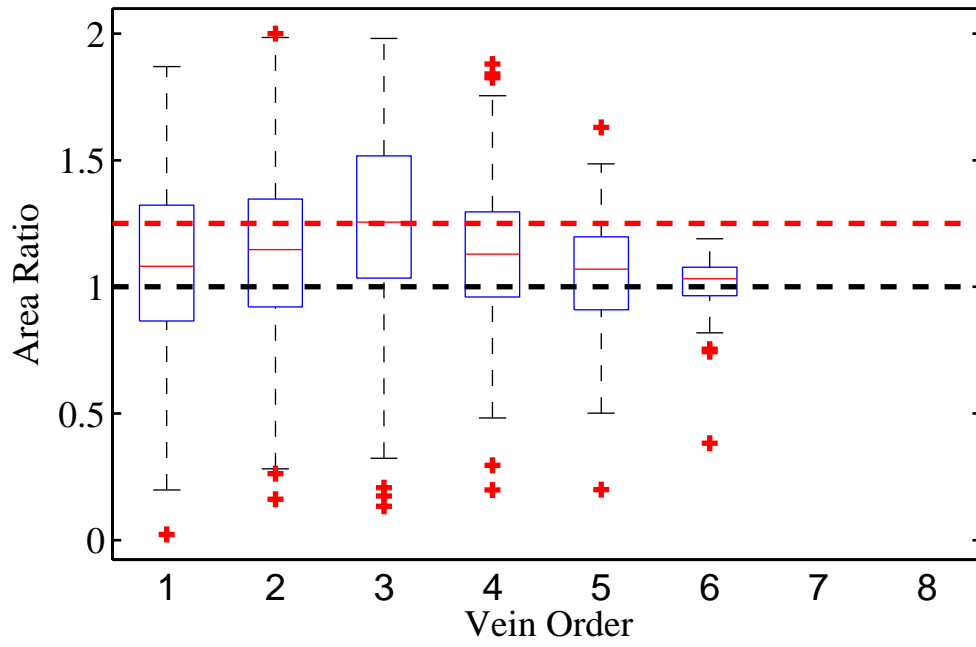

- - - Murrays Law - - - Elastic Similarity

Zelkova schneideriana Hand.-Maz.

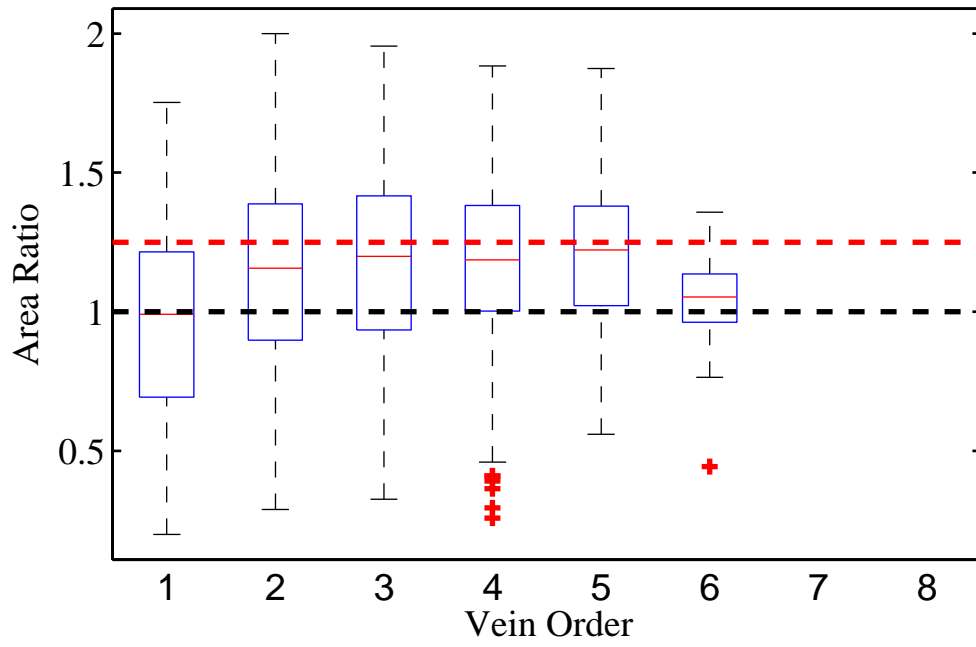

- - - Murrays Law - - - Elastic Similarity

*Xylosma racemosum* Miq.

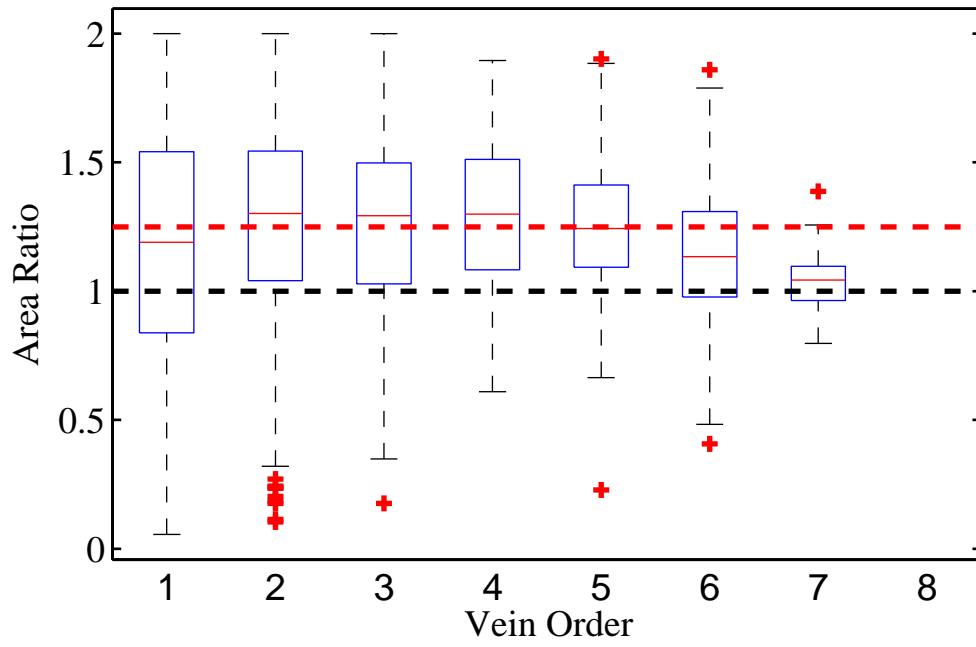

- - - Murrays Law   - - - Elastic Similarity

*Vaccinium parvifolium* Smith

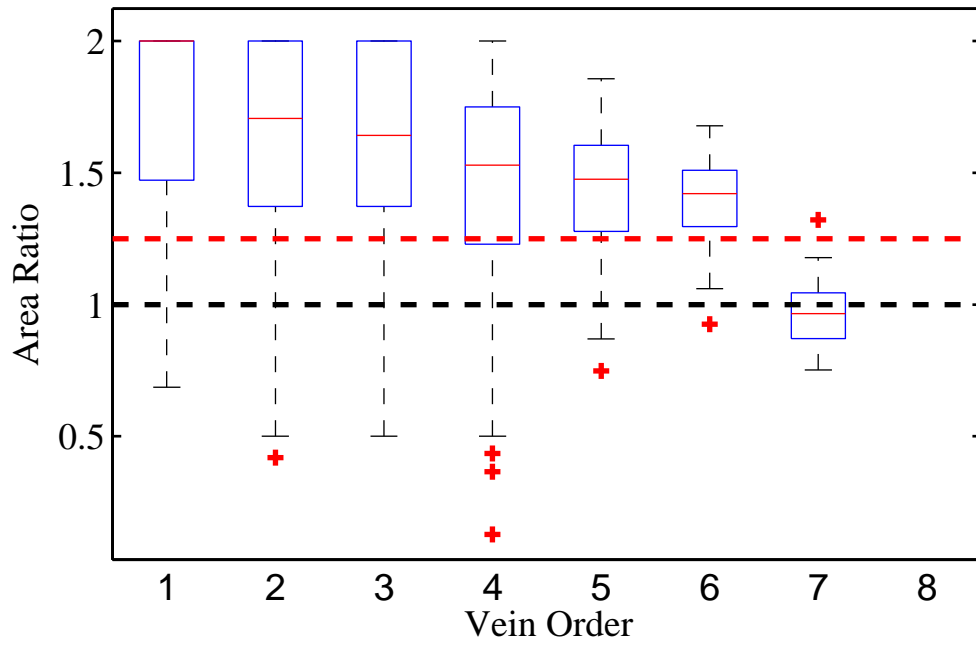

- - - Murrays Law - - - Elastic Similarity

*Parasponia melastomifolia* J.J.Sm.

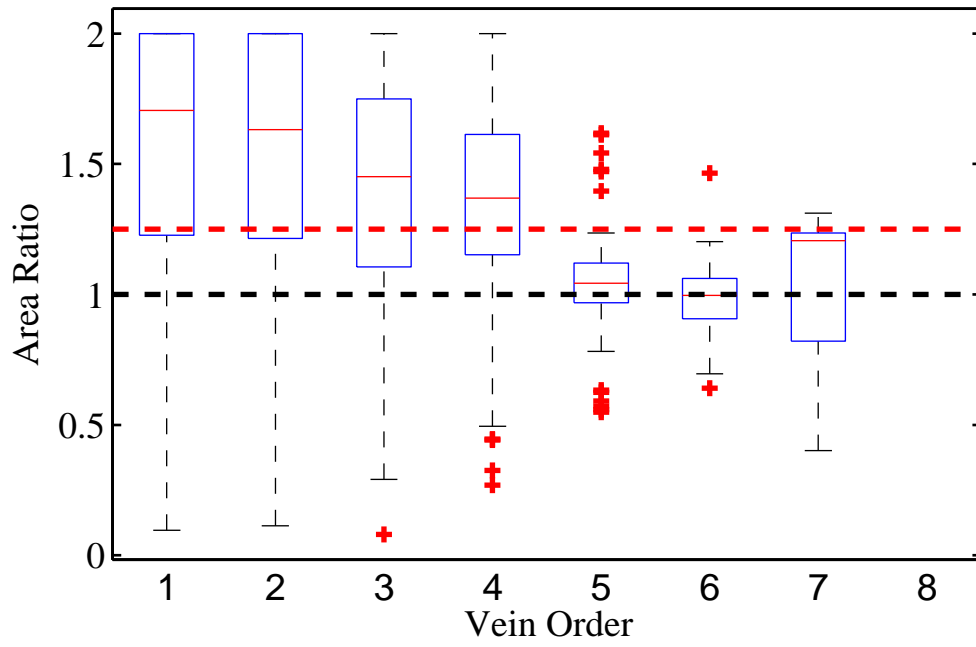



- - - Murrays Law - - - Elastic Similarity

Populus brandegeei Schneider

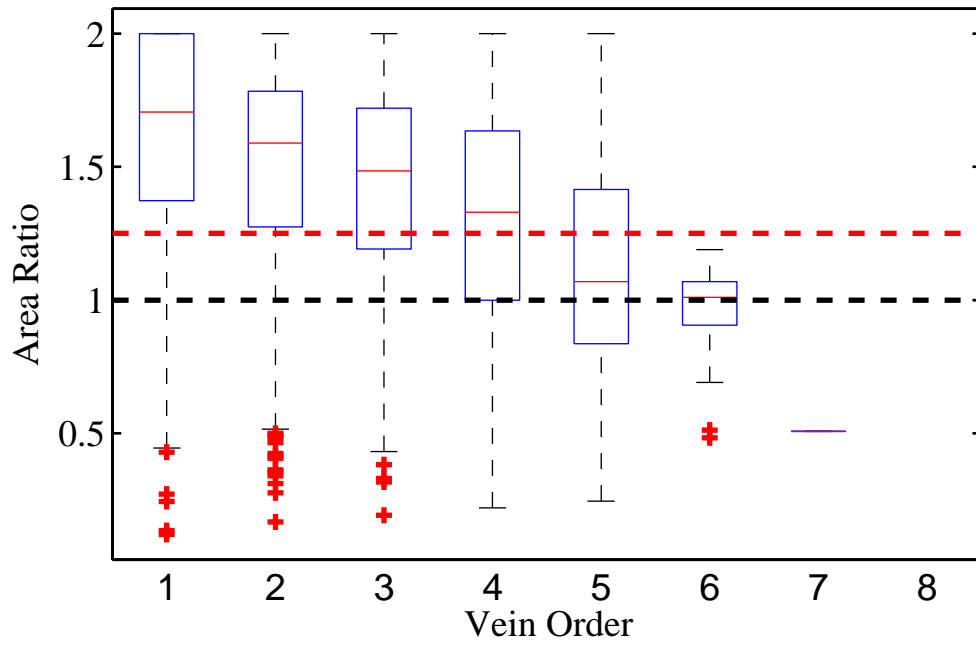

- - - Murrays Law - - - Elastic Similarity

*Persoonia elliptica*

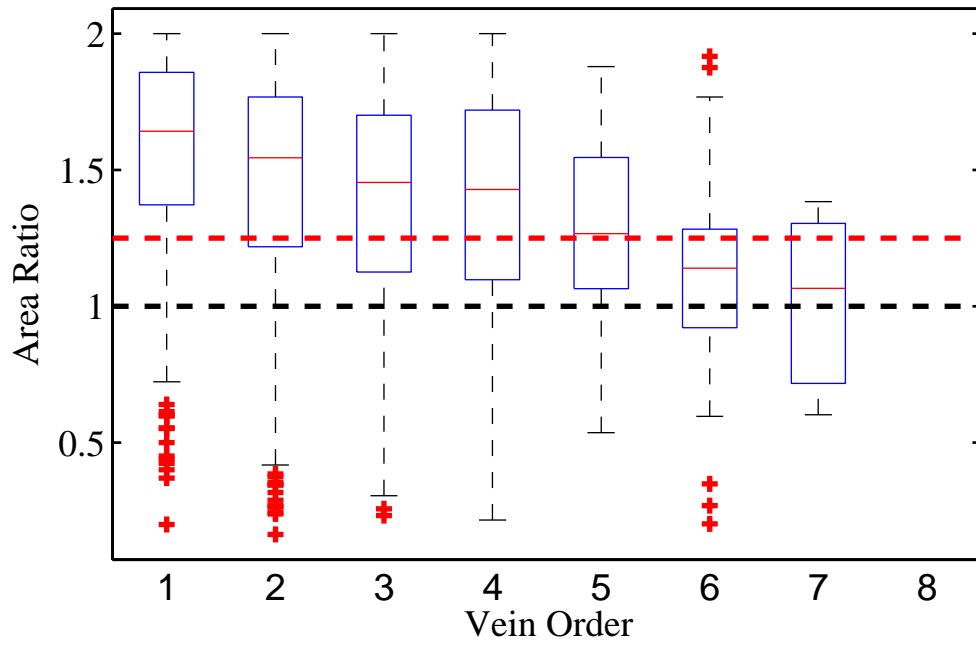

- - - Murrays Law    - - - Elastic Similarity

*Clematis pitcheri* (T. & G.) Britt.

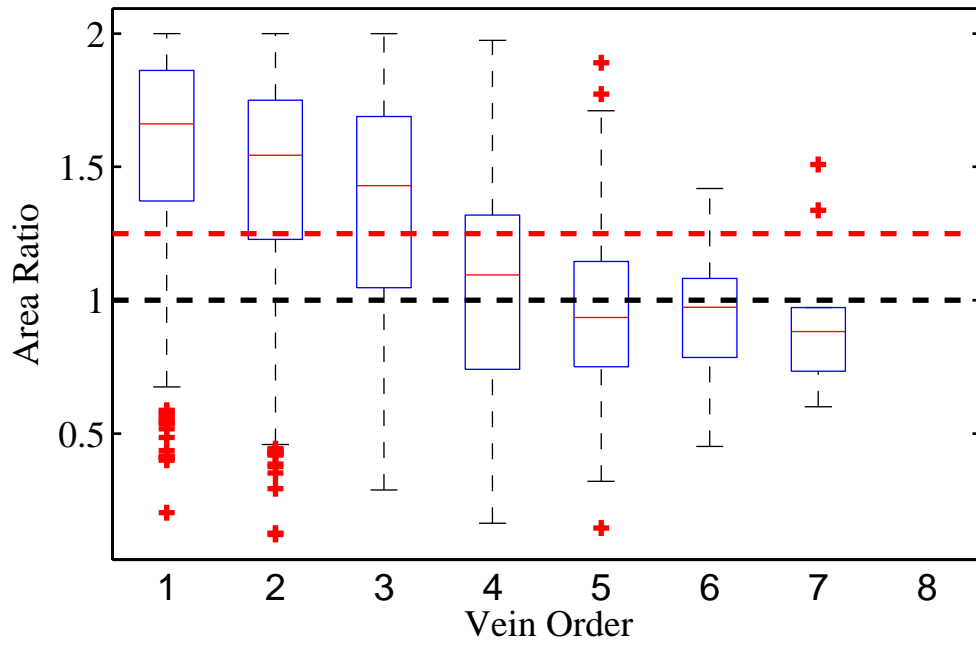

- - - Murrays Law - - - Elastic Similarity

*Clematis pitcheri* (T. & G.) Britt.

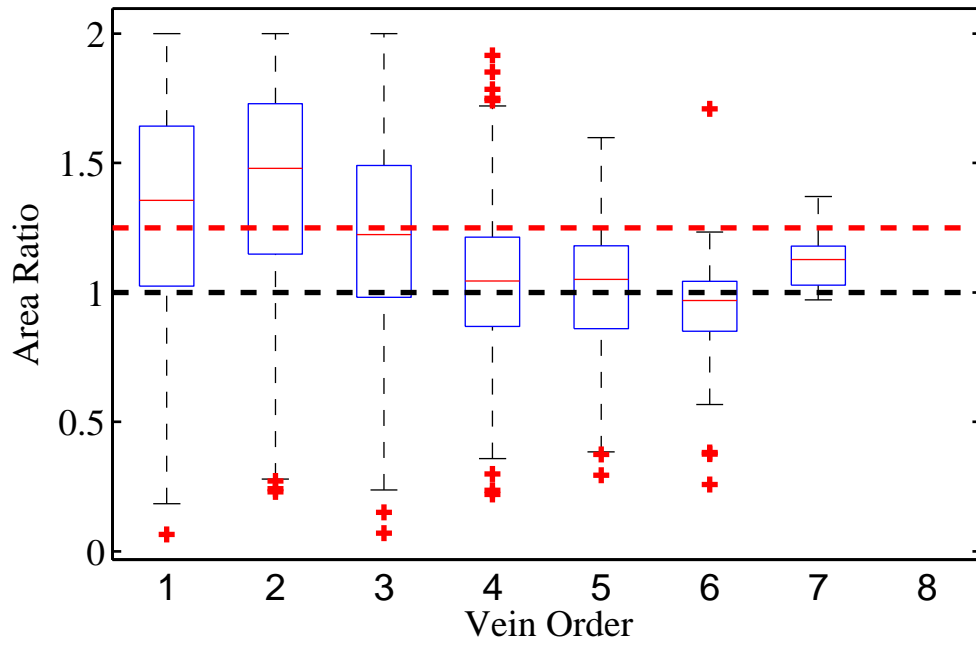

- - - Murrays Law - - - Elastic Similarity

Itea amoena

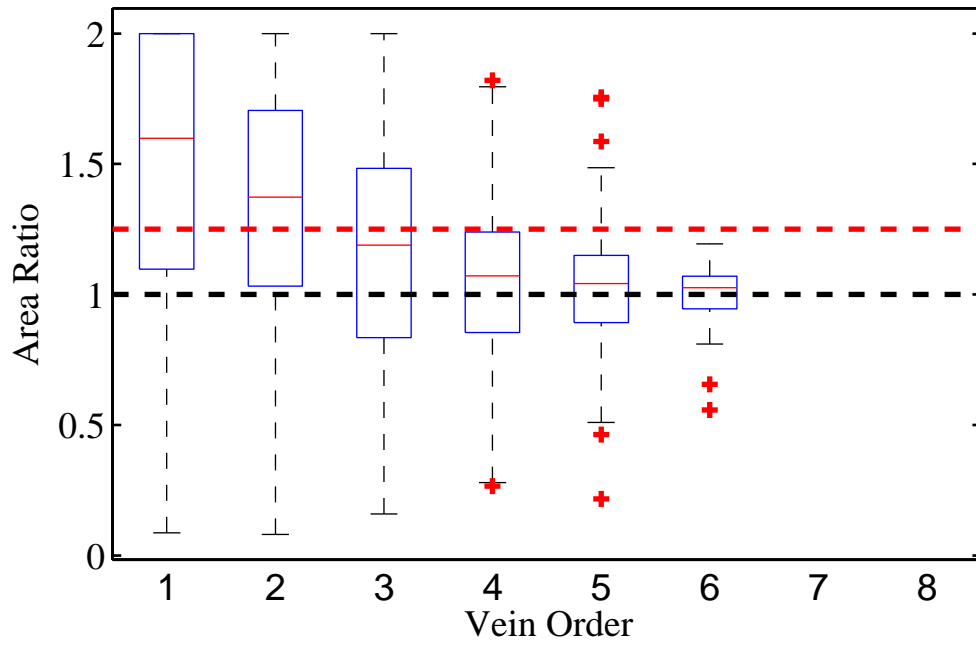

- - - Murrays Law   - - - Elastic Similarity

Combretum apiculatum

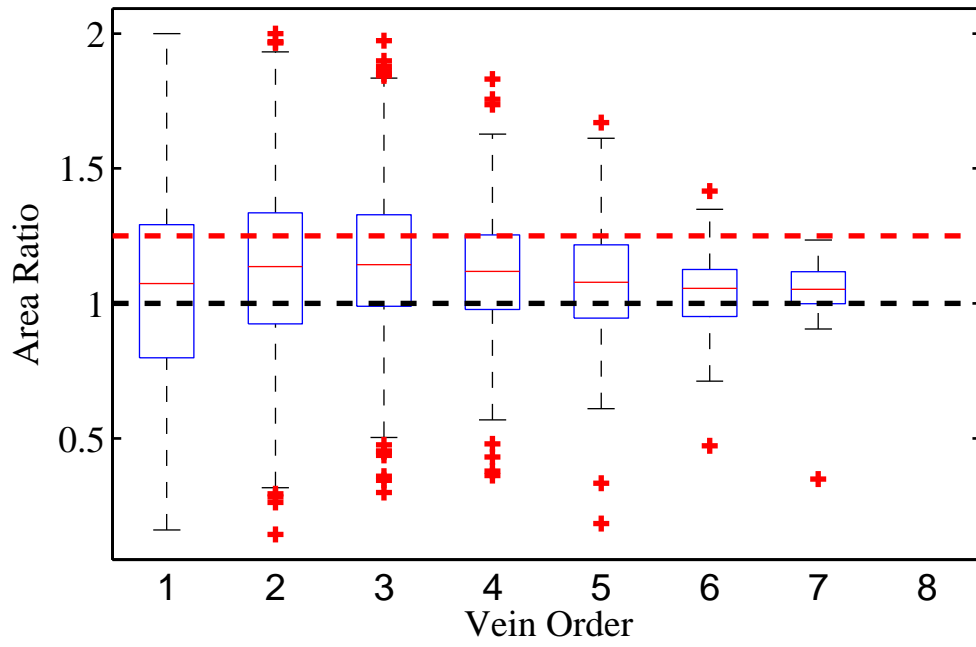

- - - Murrays Law - - - Elastic Similarity

*Elaeocarpus kinabaluensis* Knuth

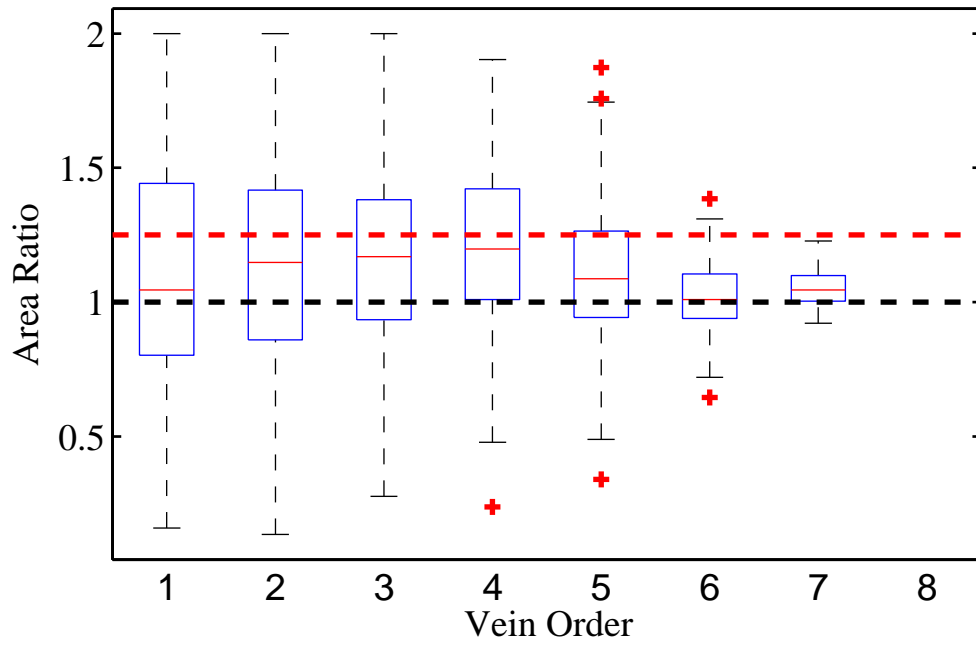

- - - Murrays Law   - - - Elastic Similarity

*Ilex boliviana* Britton

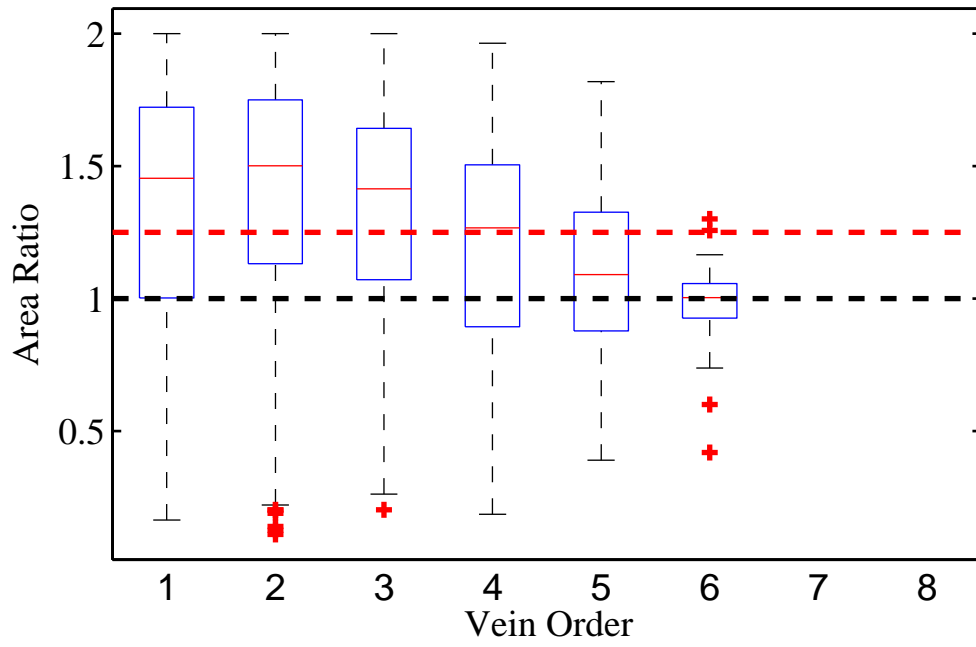



- - - Murrays Law   - - - Elastic Similarity

*Salix cyclophylla* Seem.

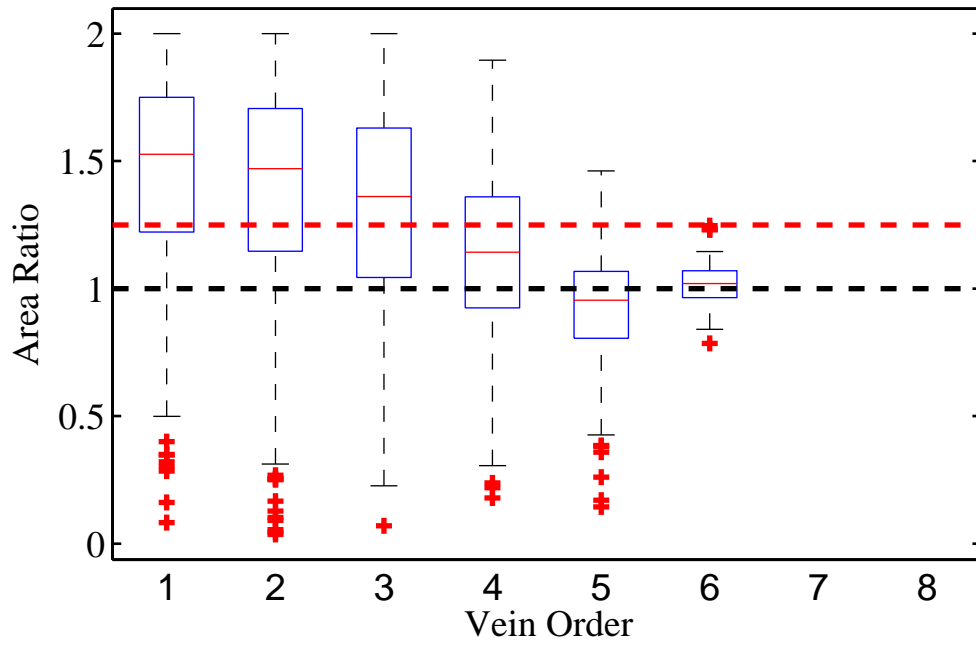

- - - Murrays Law - - - Elastic Similarity

Allantospermum borneense Forman

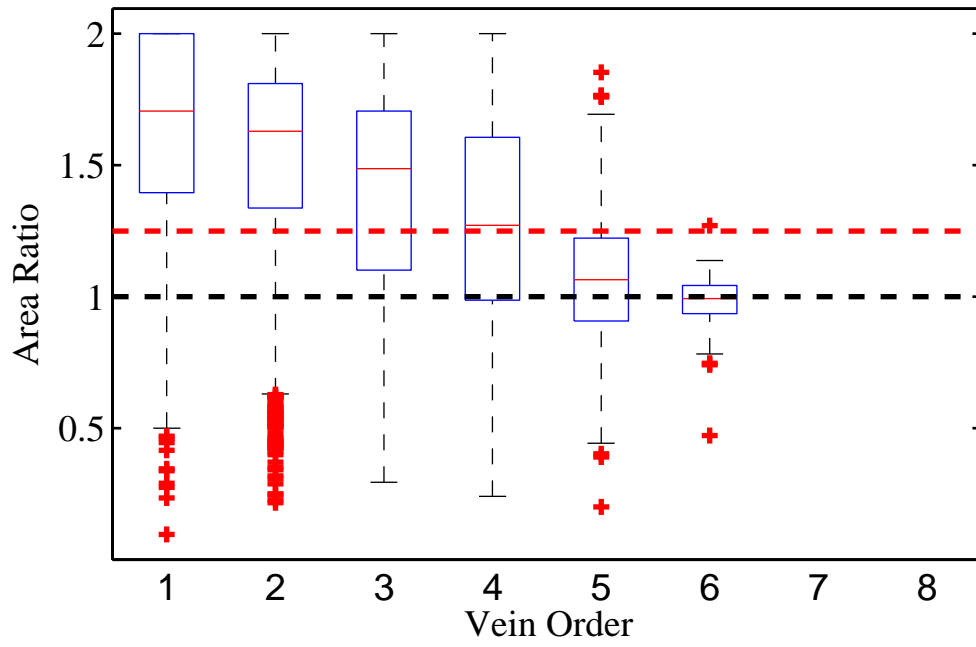

- - - Murrays Law - - - Elastic Similarity

*Eurya glabra* Bl.

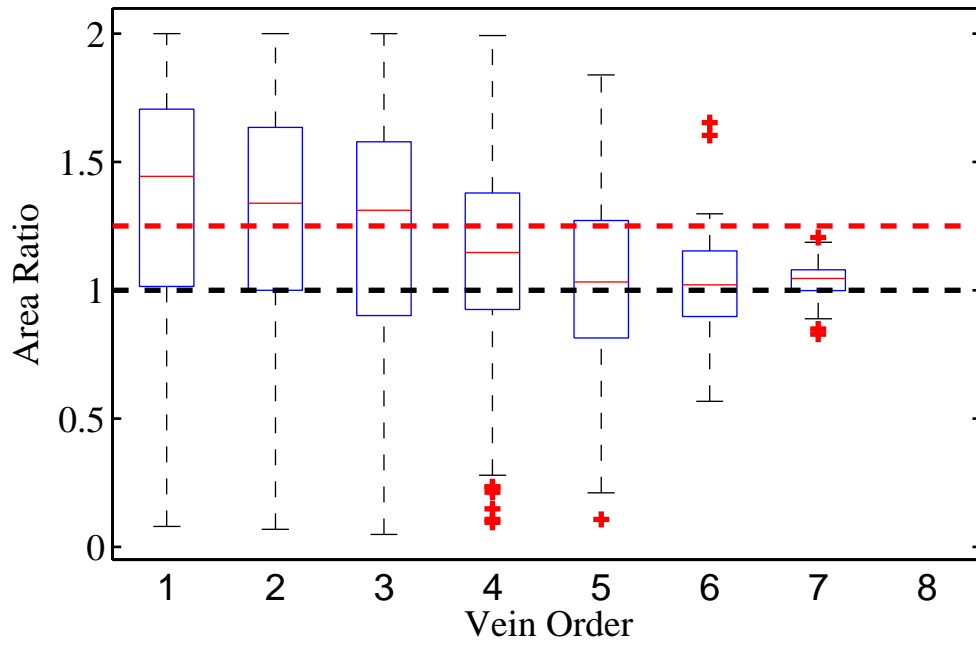

- - - Murrays Law - - - Elastic Similarity

*Clematis reticulata* Walt.

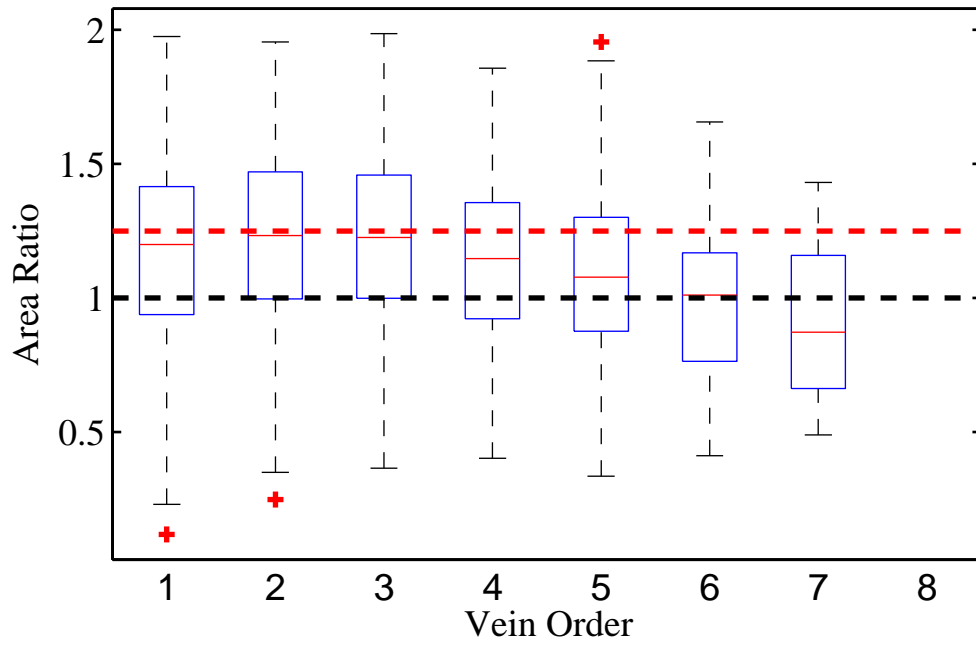

- - - Murrays Law - - - Elastic Similarity

*Brackenridgea nitida* A. Gray

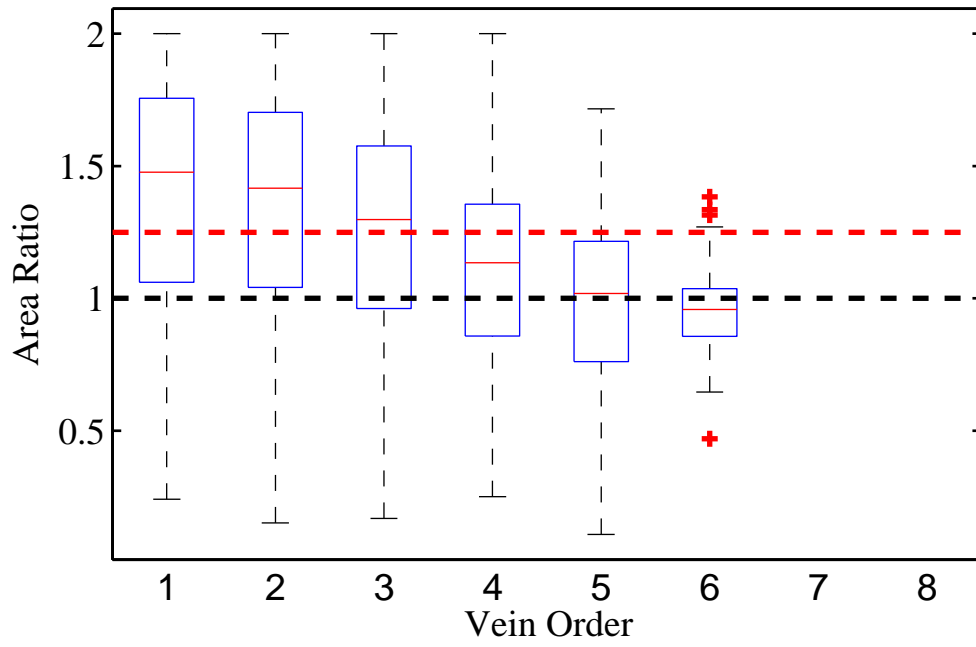

- - - Murrays Law - - - Elastic Similarity

Vasivaea alchornzoides Bail.

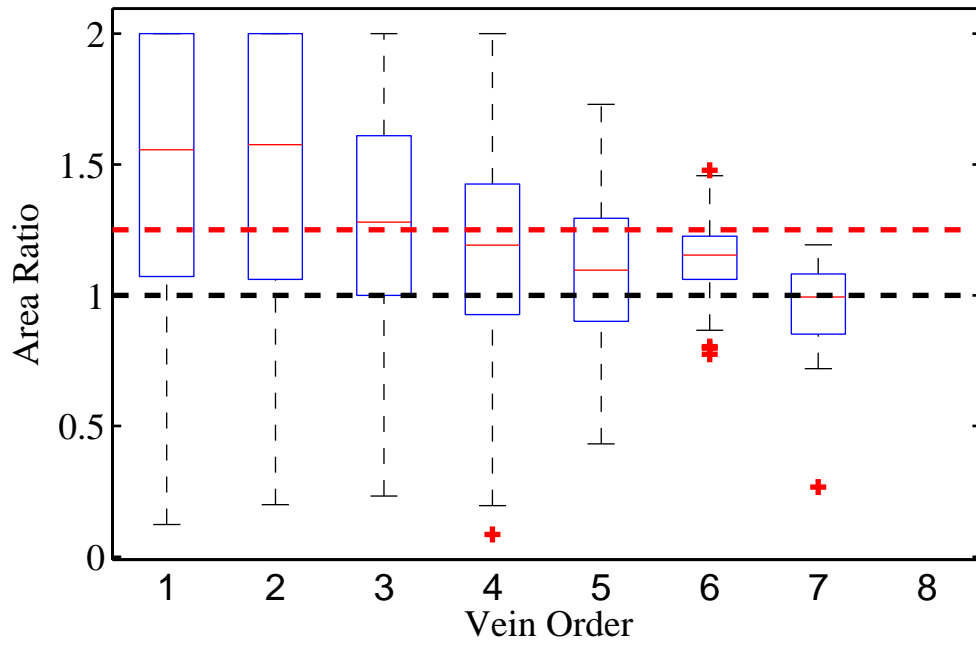

- - - Murrays Law - - - Elastic Similarity

Stephanodaphne cremostachya Baill.

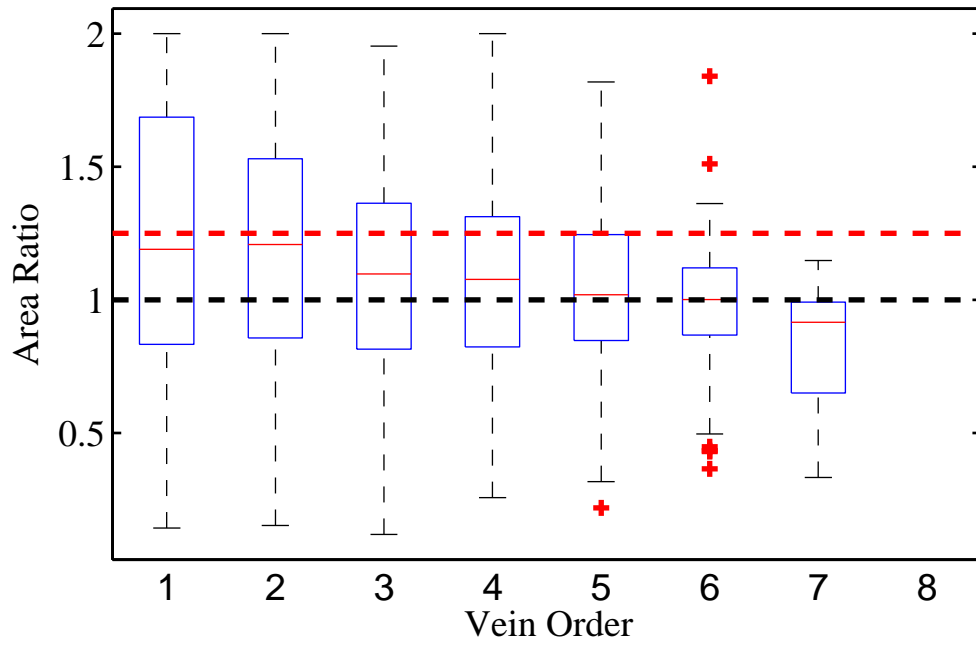

- - - Murrays Law   - - - Elastic Similarity

*Crataegus douglasii* Lindl.

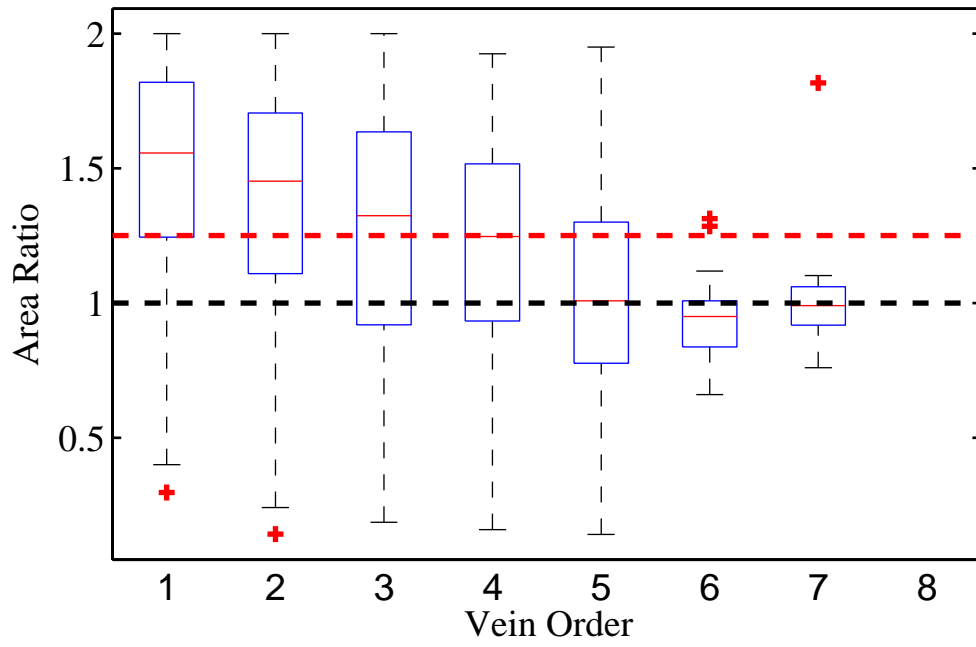



- - - Murrays Law - - - Elastic Similarity

*Berberis jamesiana*

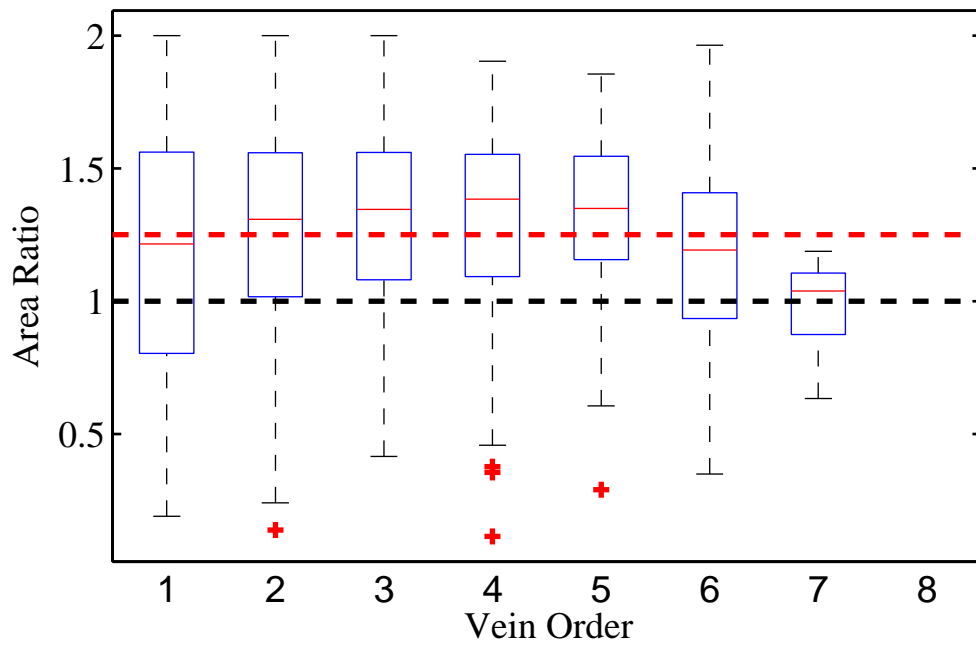

- - - Murrays Law - - - Elastic Similarity

*Casearia brasiliensis* Eichl.

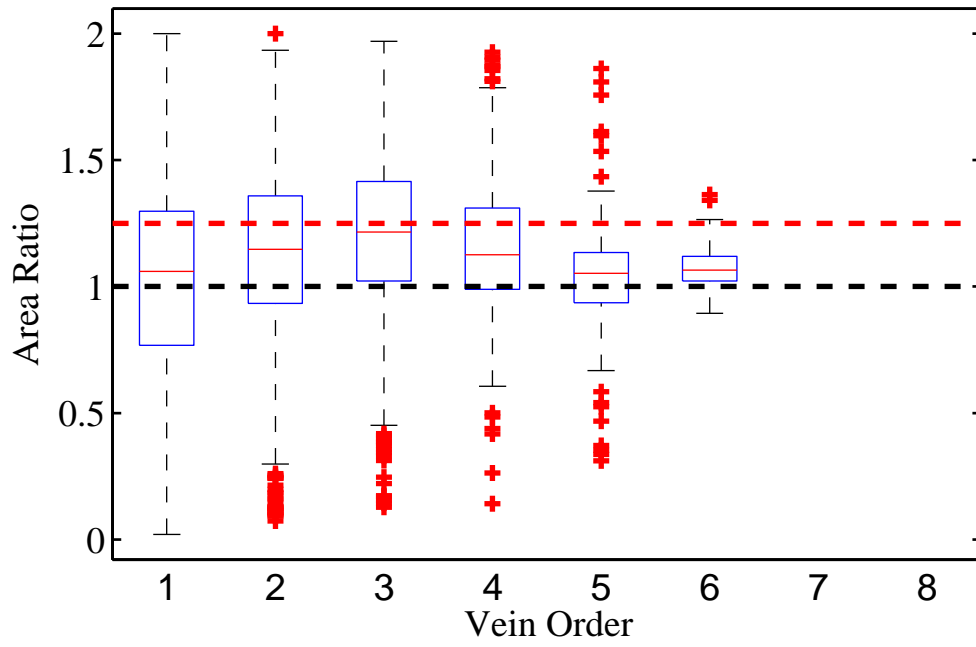

- - - Murrays Law - - - Elastic Similarity

*Ouratea morsonii* (Hutch & Dalz.) Farron

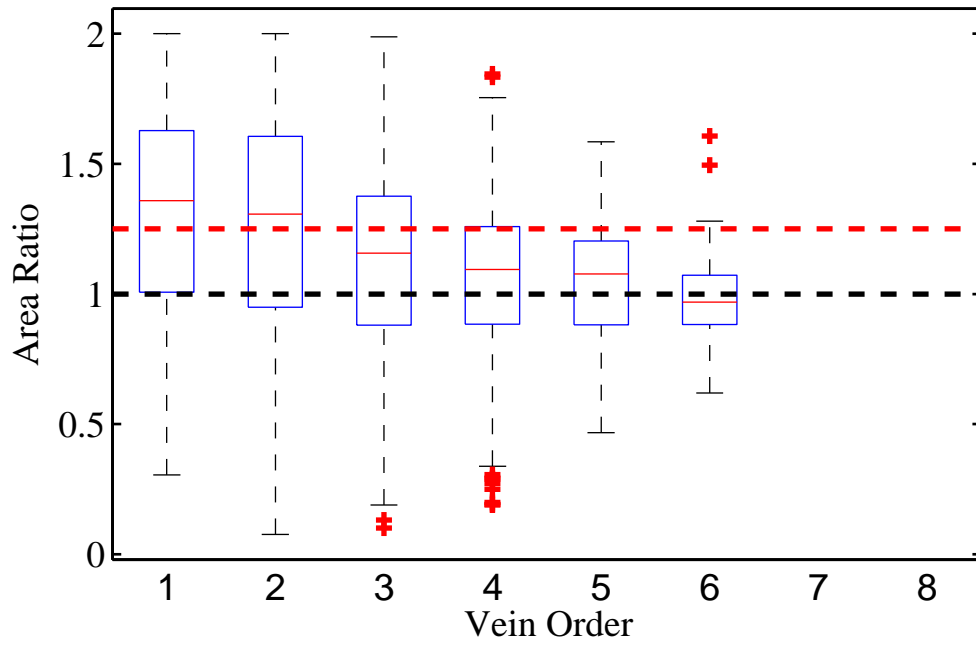

- - - Murrays Law   - - - Elastic Similarity

*Clematis reticulata* Walt.

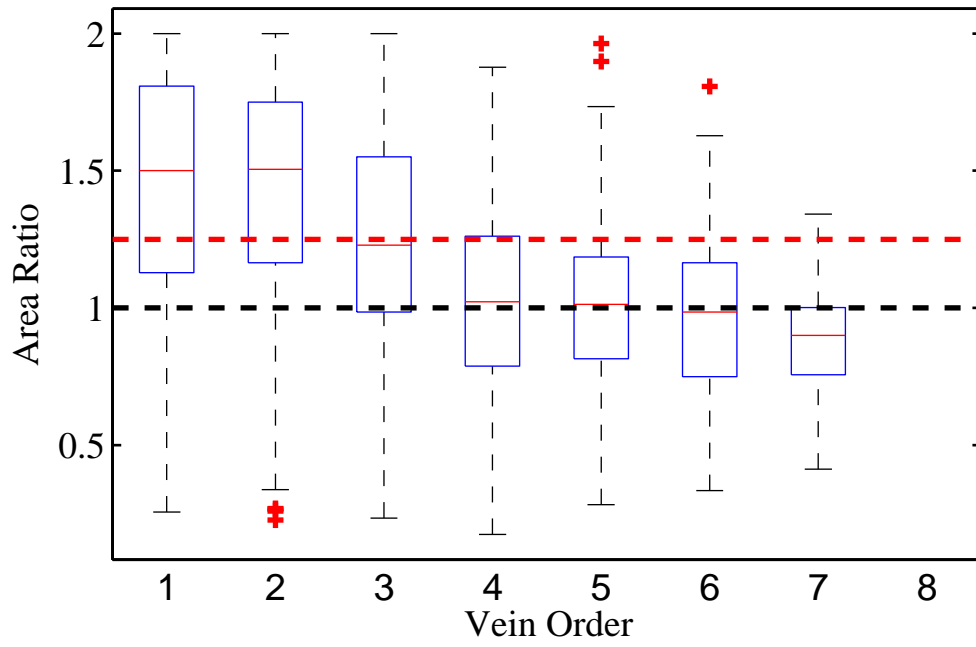

- - - Murrays Law - - - Elastic Similarity

*Photinia variabilis* Hemsl.

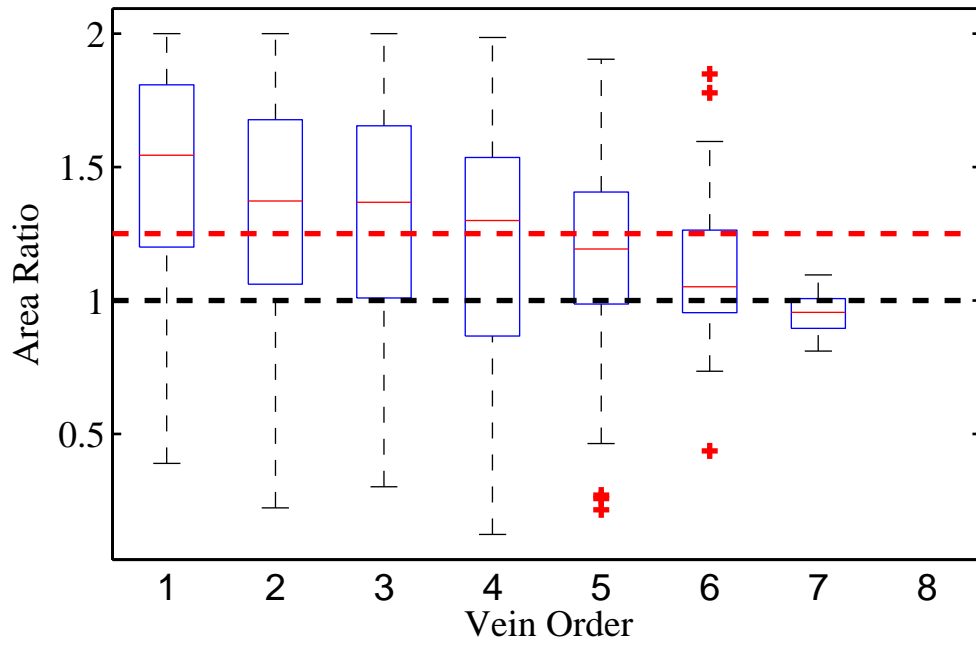

- - - Murrays Law - - - Elastic Similarity

*Sapium petiolare* (Muell.) Huber

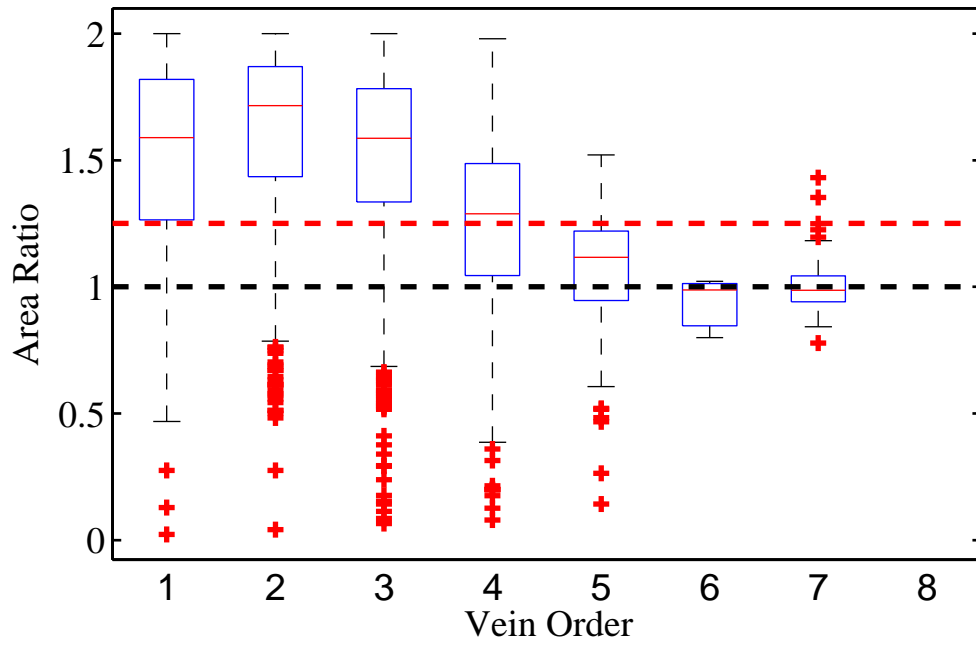

- - - Murrays Law - - - Elastic Similarity

*Schima superba*

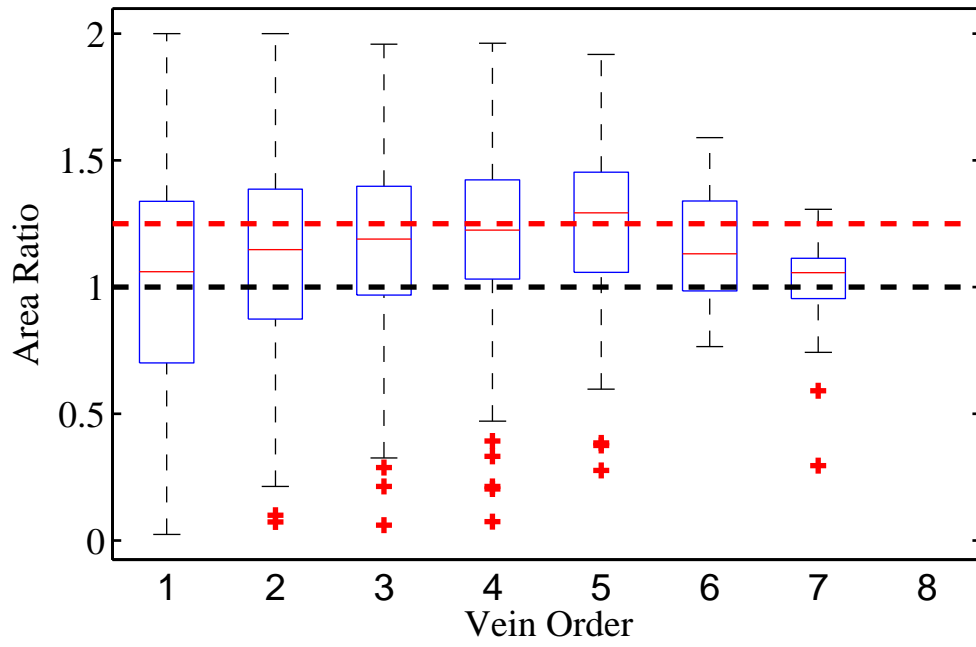

- - - Murrays Law   - - - Elastic Similarity

*Stereospermum seemanii* Rolfe

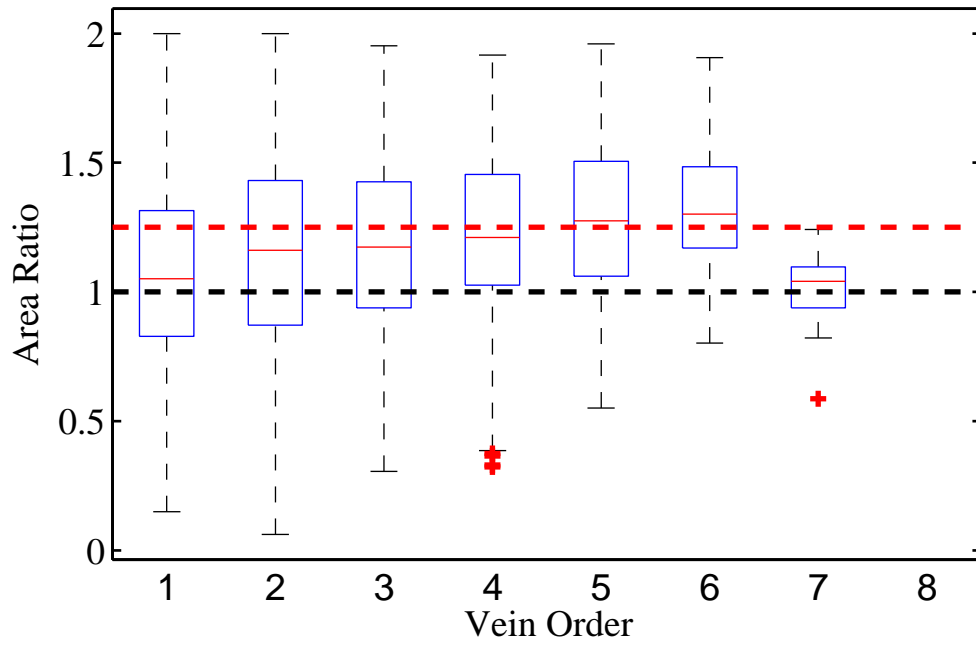



- - - Murrays Law - - - Elastic Similarity

*Isodendrion longifolium* A. Gray

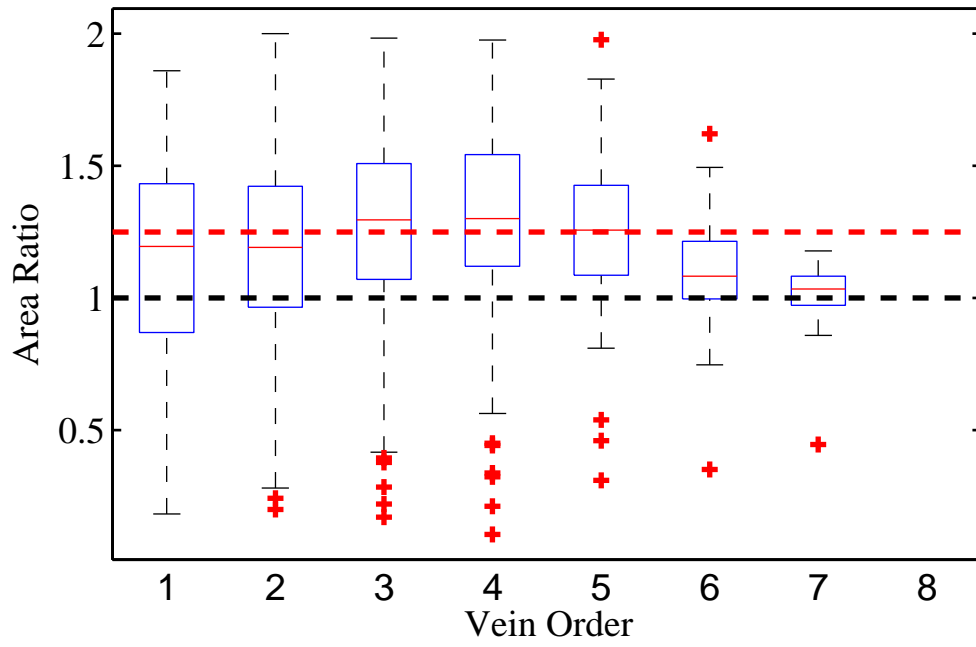

- - - Murrays Law - - - Elastic Similarity

Memora flaviflora (Miq.) Pulle

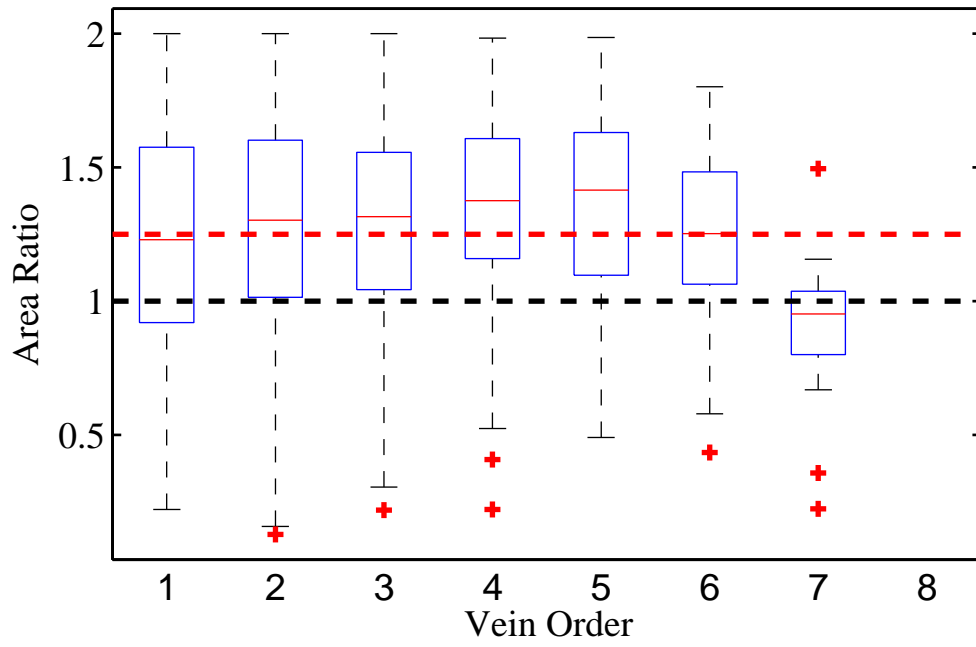

- - - Murrays Law - - - Elastic Similarity

*Planera aquatica* (Walt.) J.F. Gmel.

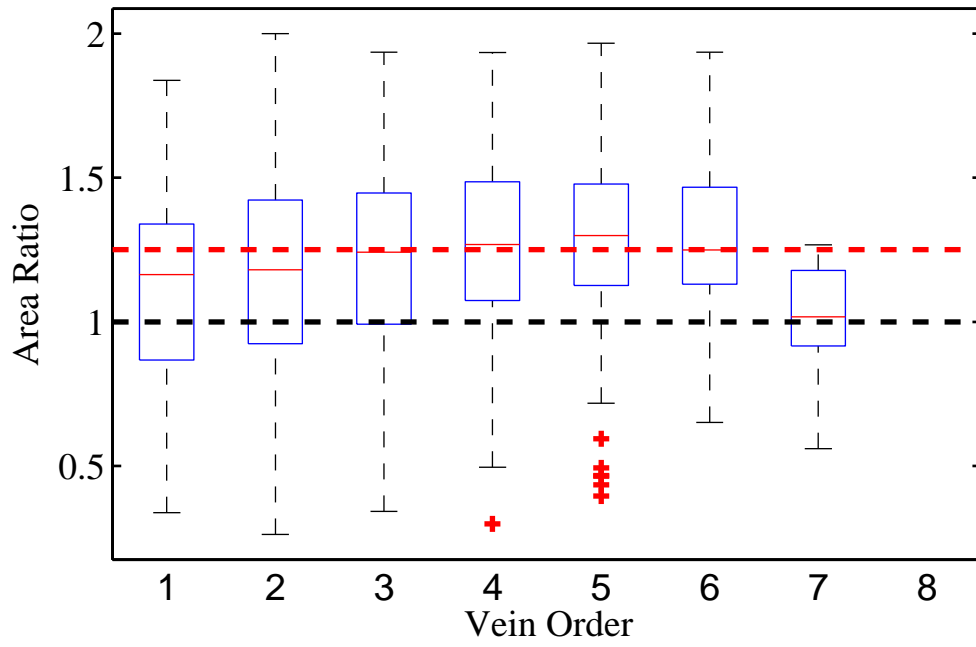

- - - Murrays Law - - - Elastic Similarity

*Gaultheria oppositifolia* Hook.

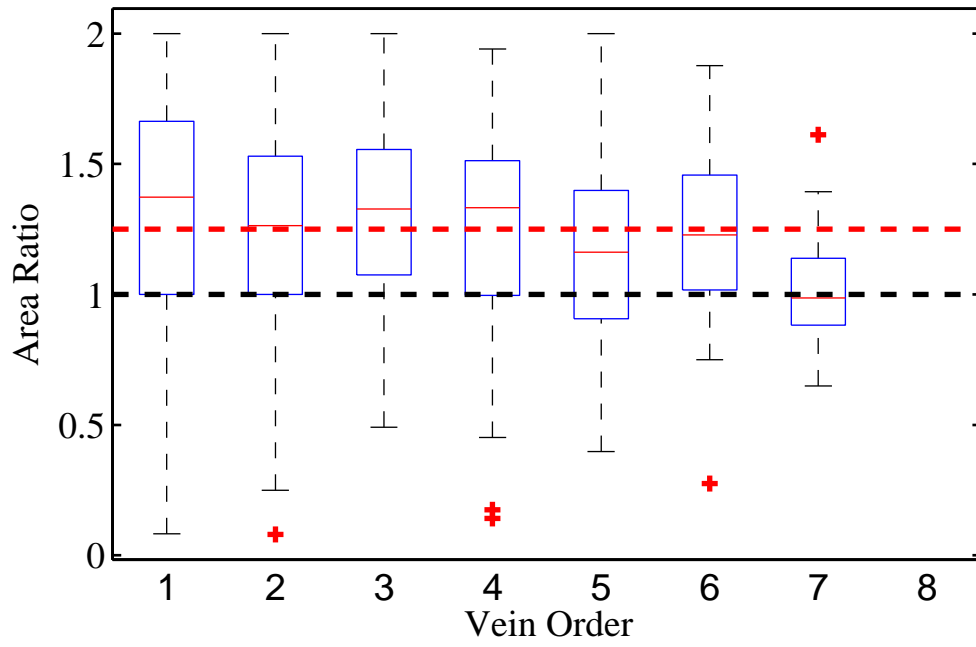

- - - Murrays Law - - - Elastic Similarity

*Fraxinus floribunda* Wall.

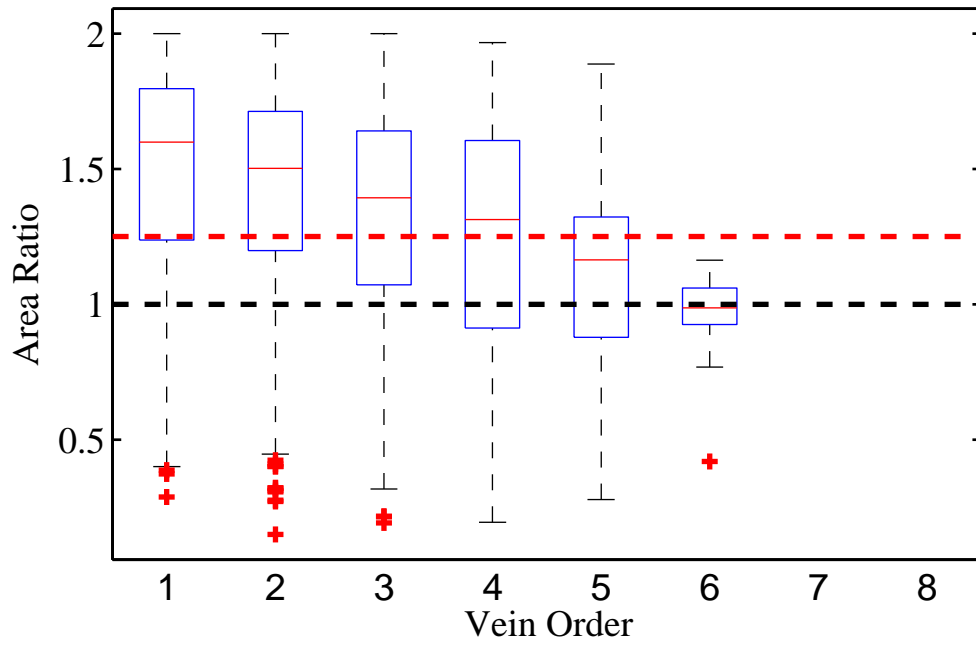

- - - Murrays Law - - - Elastic Similarity

*Distylium myricoides* Hemsl.

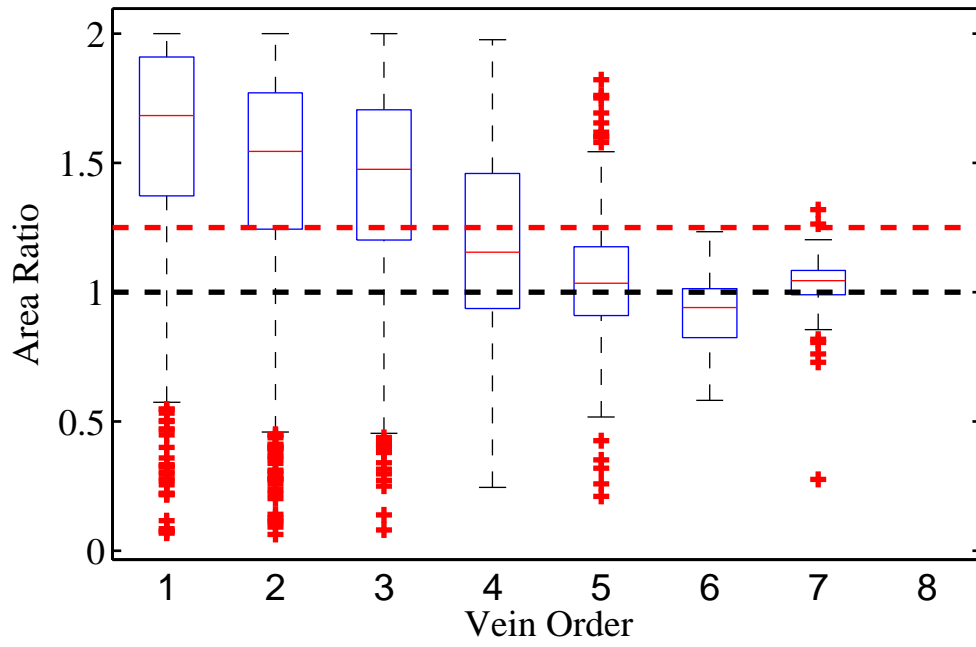

- - - Murrays Law - - - Elastic Similarity

*Elaeocarpus cyaneus* Ait.

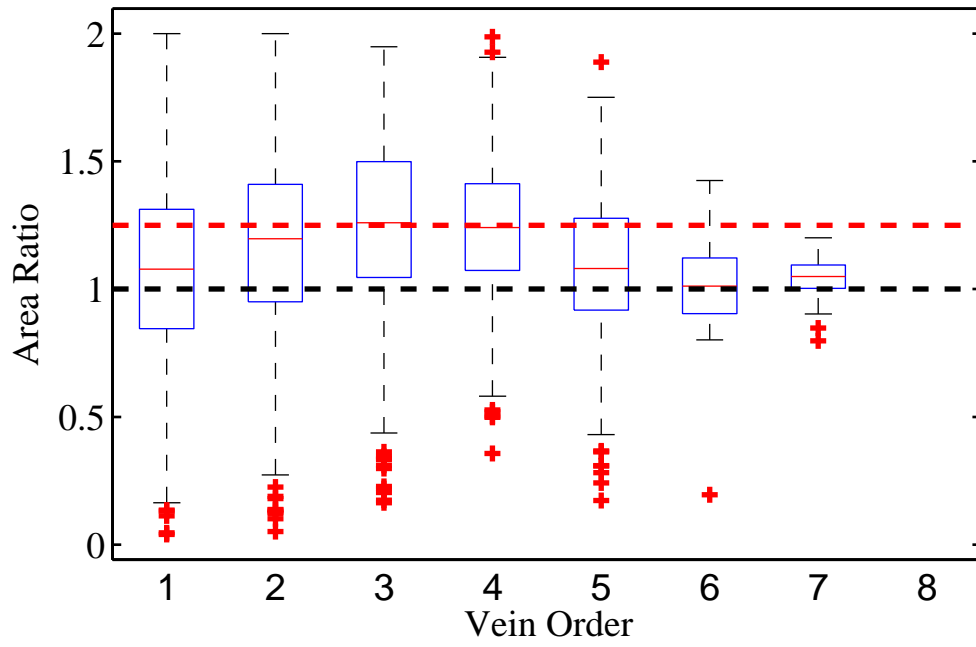

- - - Murrays Law   - - - Elastic Similarity

*Fraxinus sieboldiana* Bl.

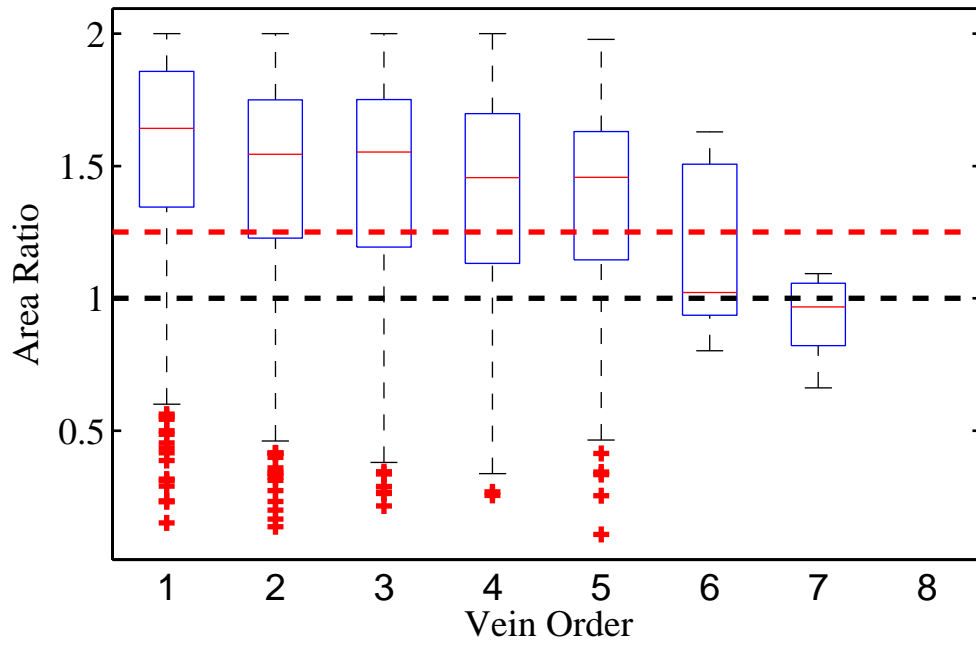



- - - Murrays Law   - - - Elastic Similarity

*Hibiscus ribifolius* A. Gray

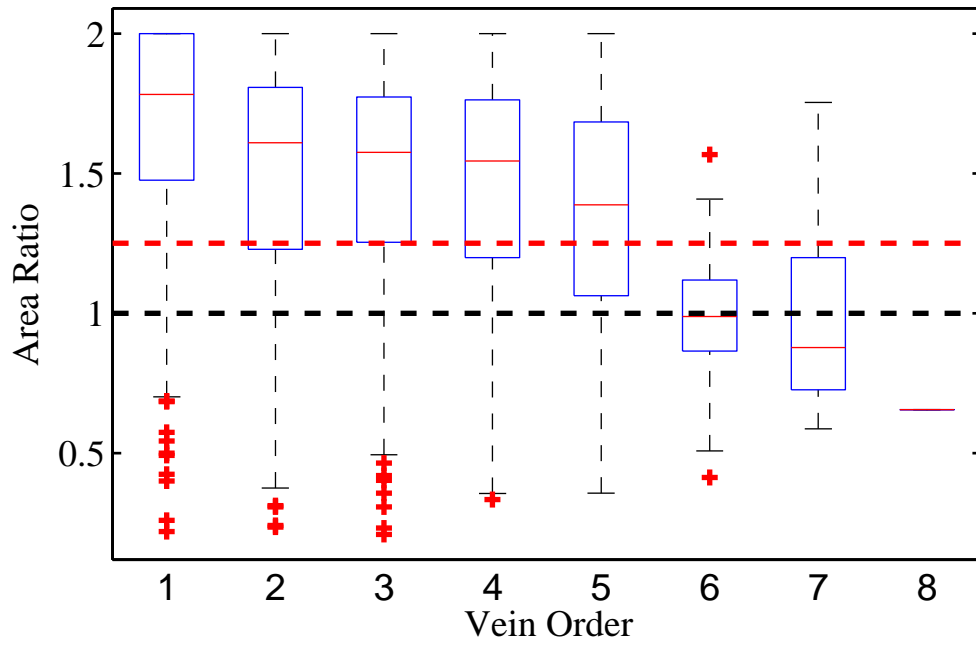

- - - Murrays Law   - - - Elastic Similarity

*Sarcotheca ferruginea* Merr.

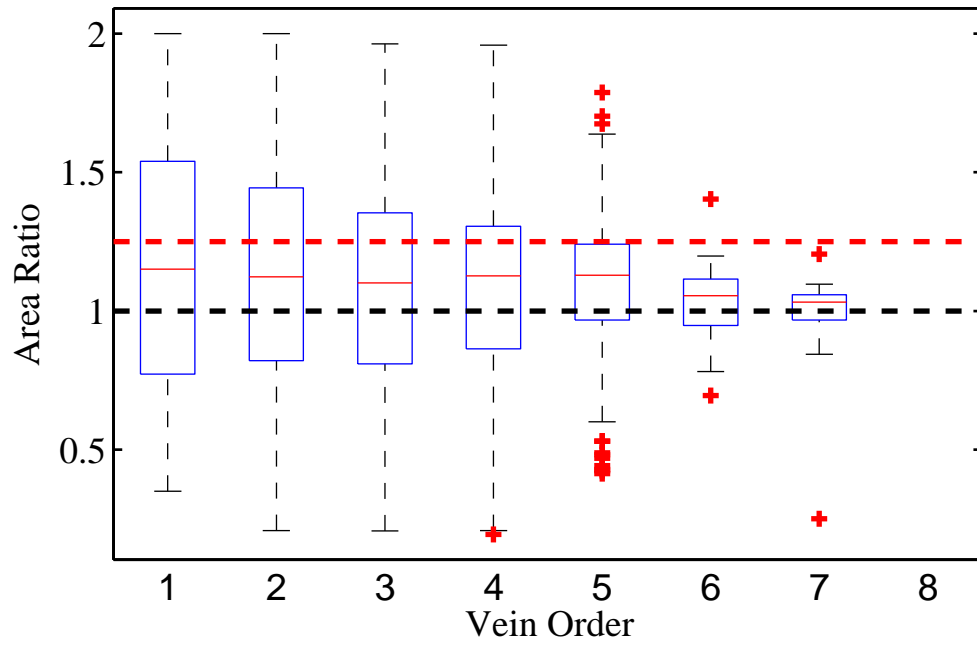

- - - Murrays Law   - - - Elastic Similarity

Weinmannia laurina H.B.K.

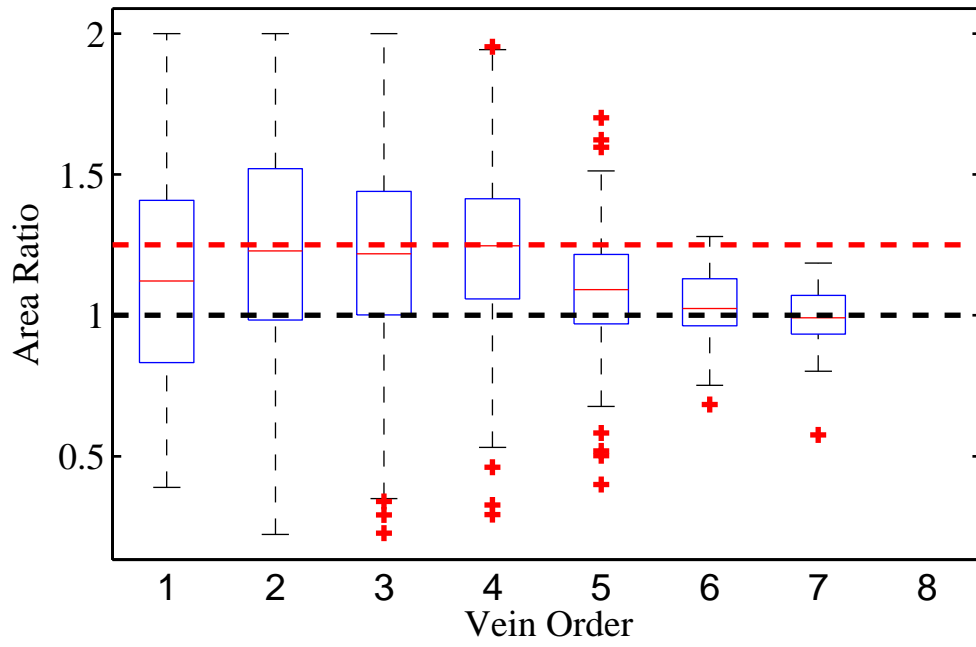

- - - Murrays Law - - - Elastic Similarity

*Acrophyllum venosum* Benth.

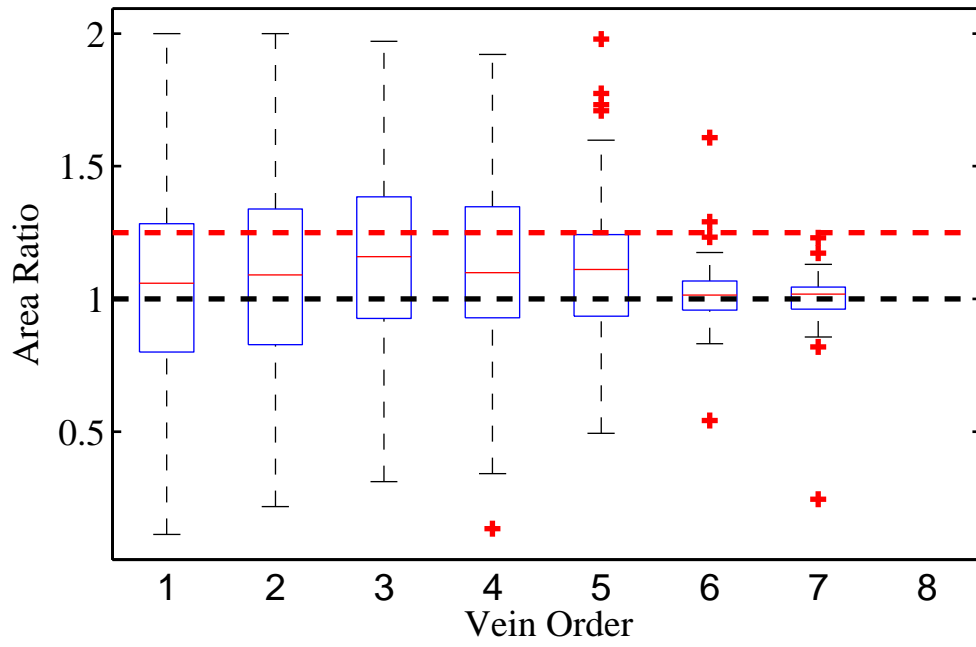

- - - Murrays Law - - - Elastic Similarity

*Alchornea? ilicifolia* J.Sm.

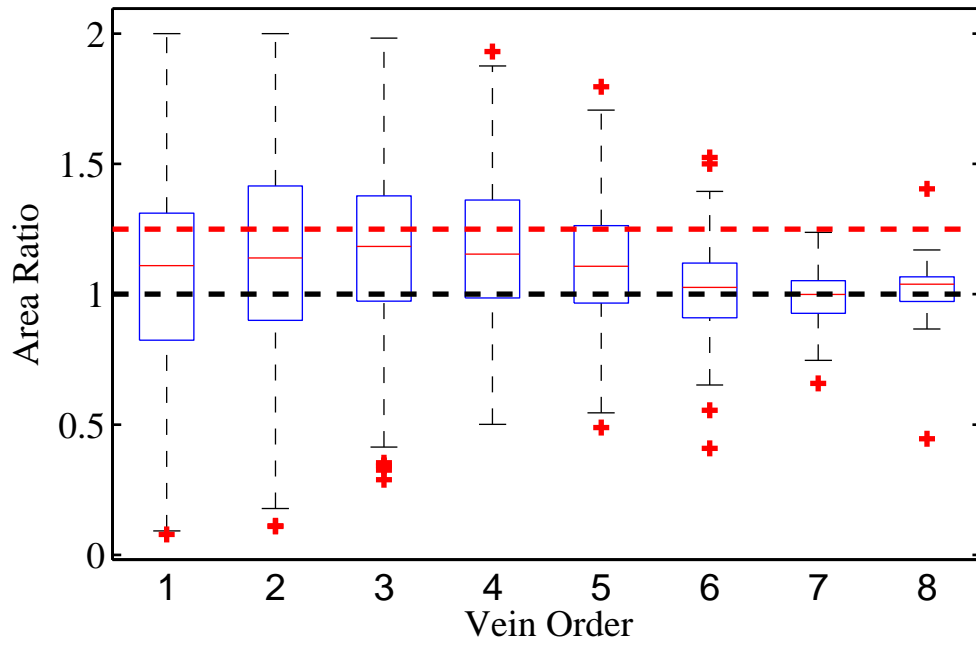

- - - Murrays Law - - - Elastic Similarity

*Quercus dilatata* Lindl.

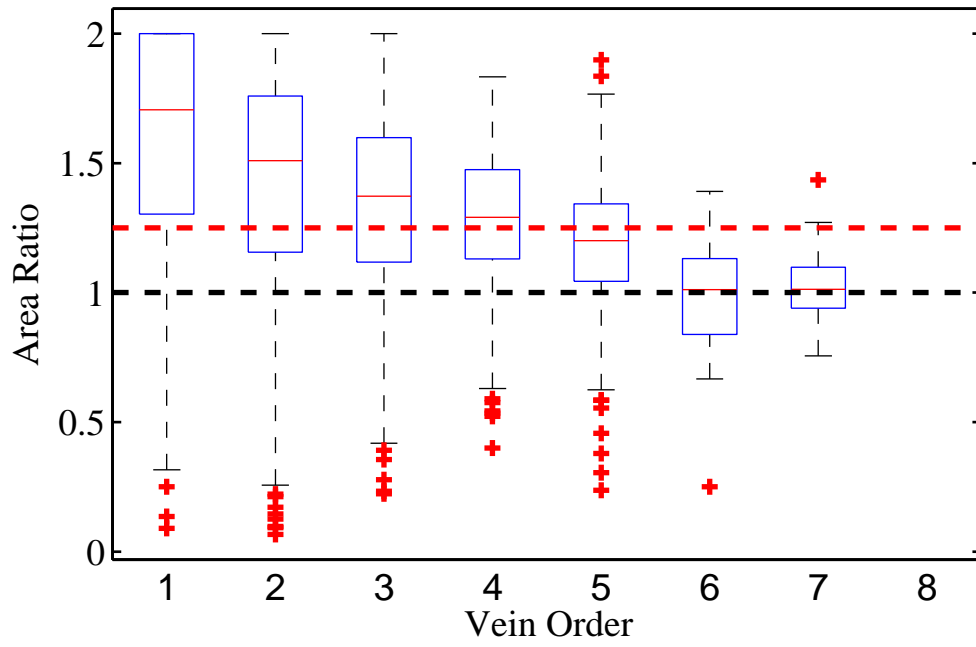

- - - Murrays Law - - - Elastic Similarity

*Rhoicissus rhomboidea* (E. Mey.) Planch

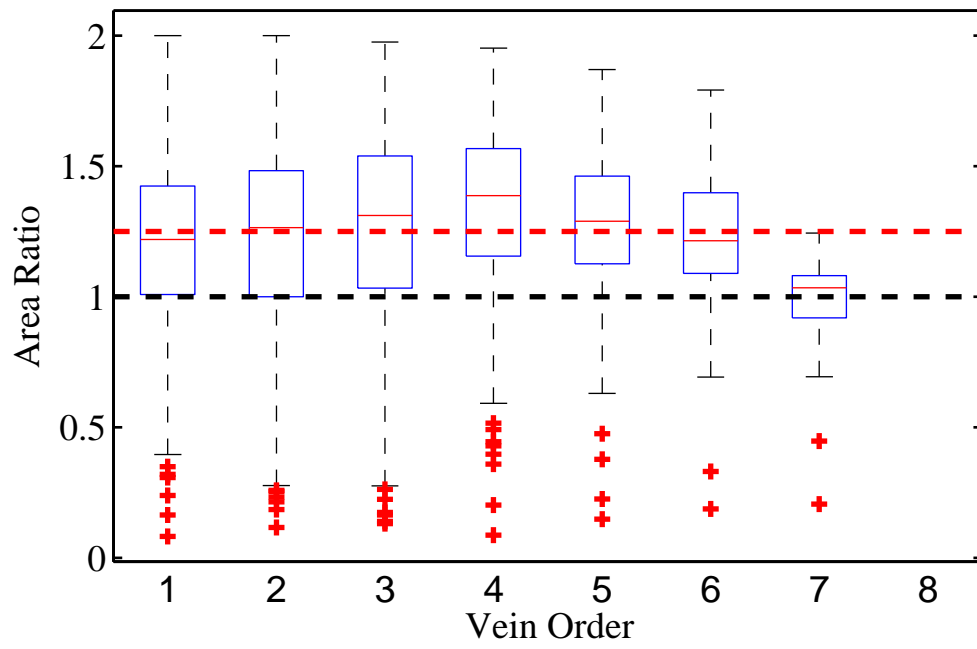

- - - Murrays Law   - - - Elastic Similarity

Populus alba L.

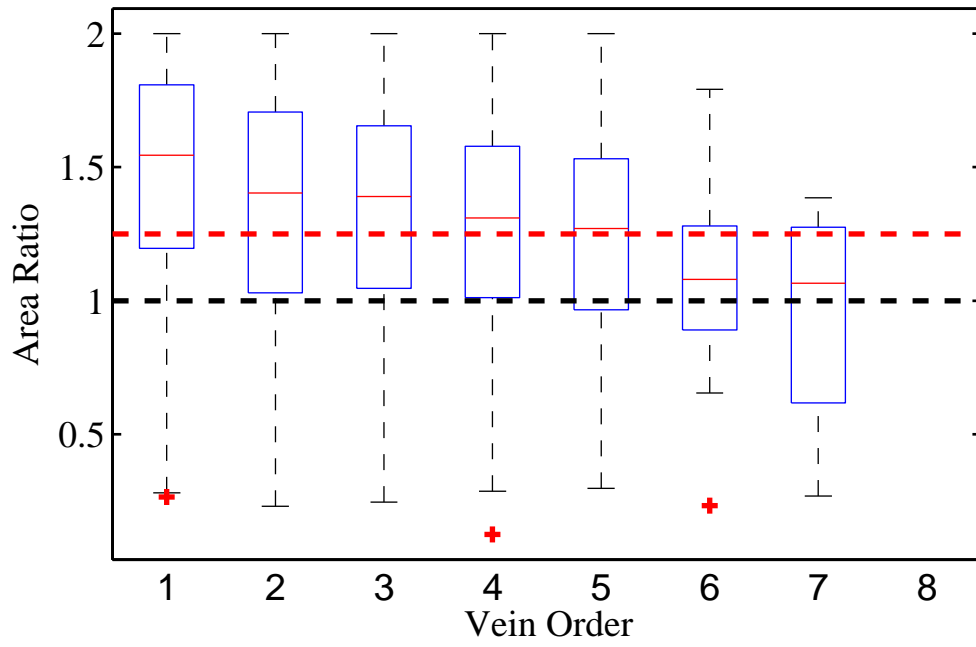



- - - Murrays Law - - - Elastic Similarity

*Celtis formosana* Hay.

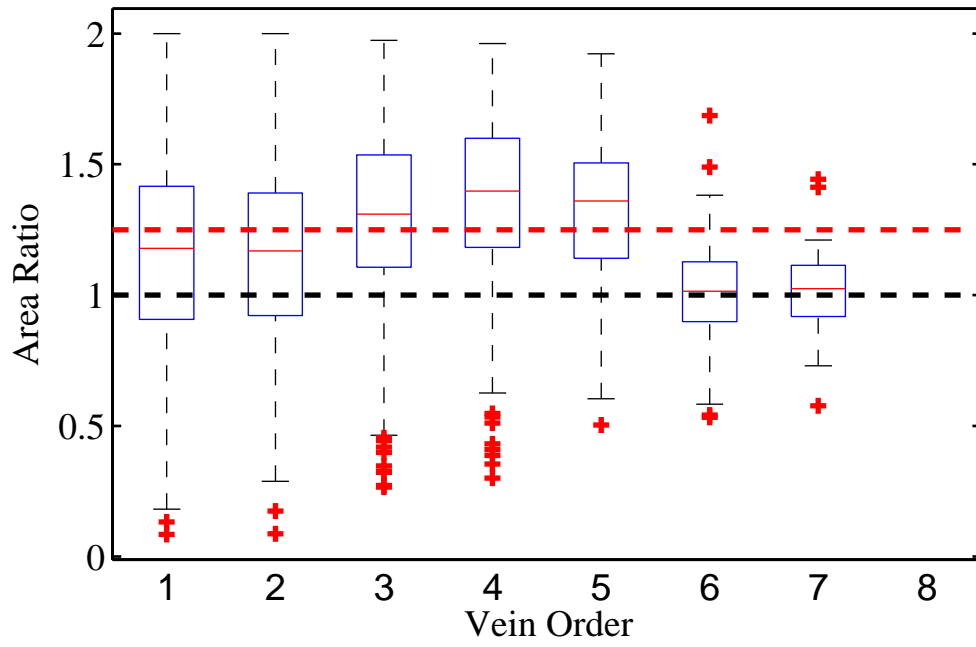

- - - Murrays Law - - - Elastic Similarity

*Betula fontinalis*

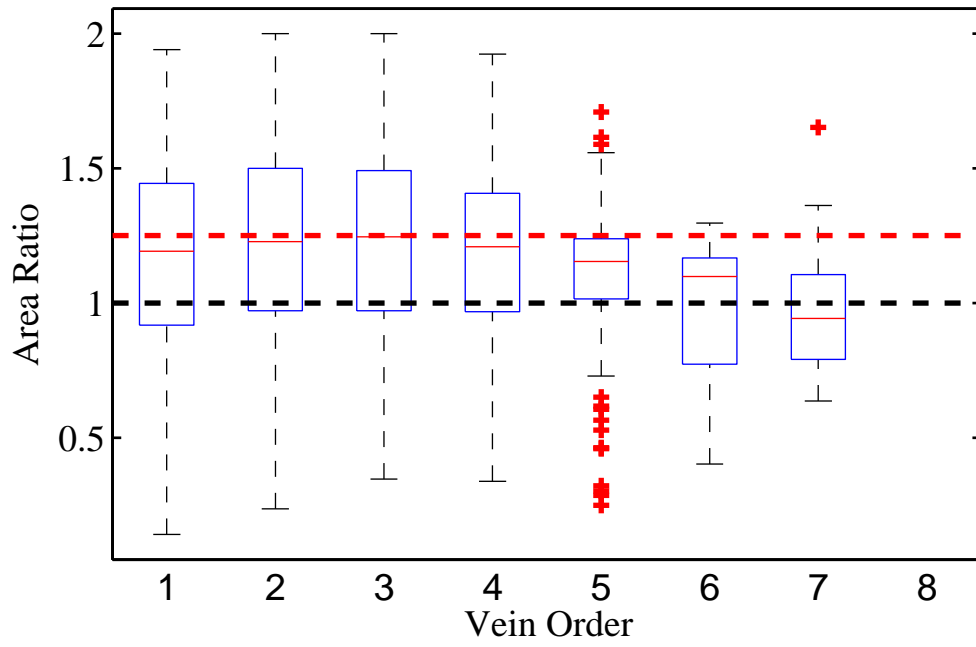

- - - Murrays Law - - - Elastic Similarity

Quercus gentryi Muller

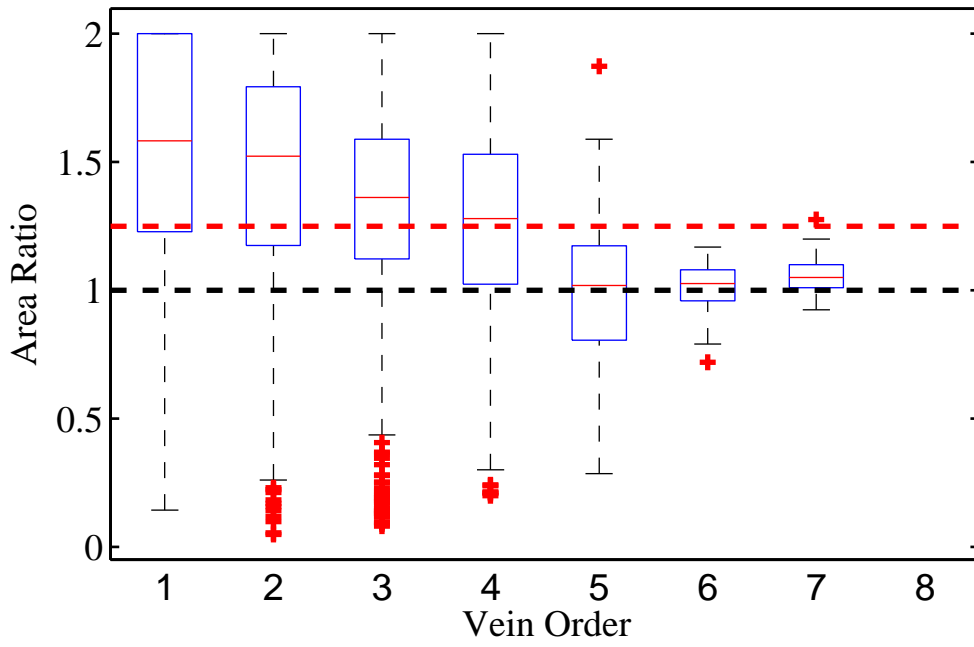

- - - Murrays Law - - - Elastic Similarity

*Rinorea macrophylla* (Deene.) O.K.

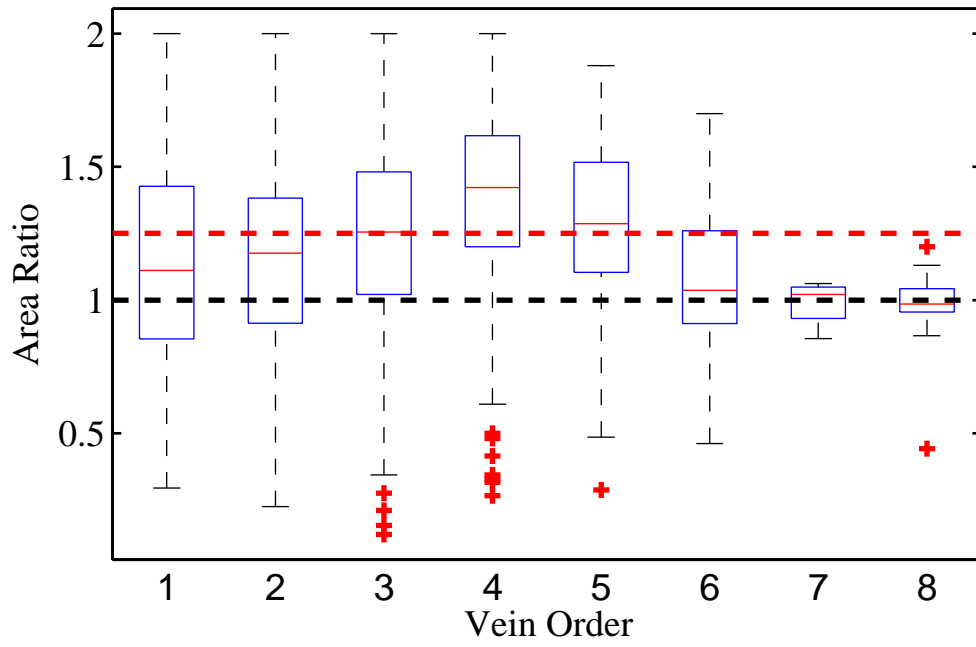

- - - Murrays Law   - - - Elastic Similarity

*Crataegus rivularis* Nutt.

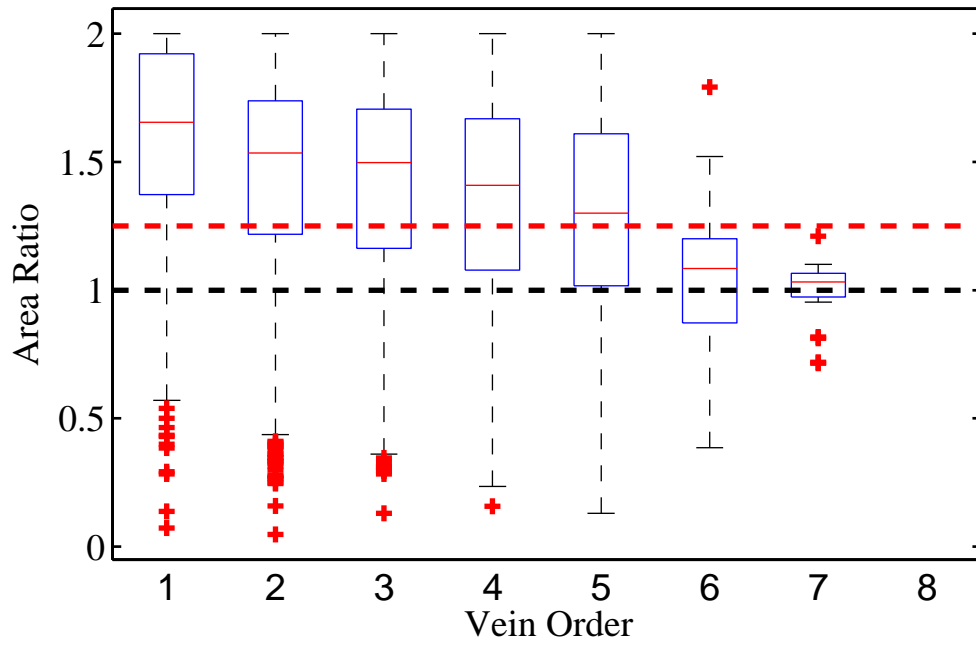

- - - Murrays Law   - - - Elastic Similarity

*Acalypha mapirensis* Fax.

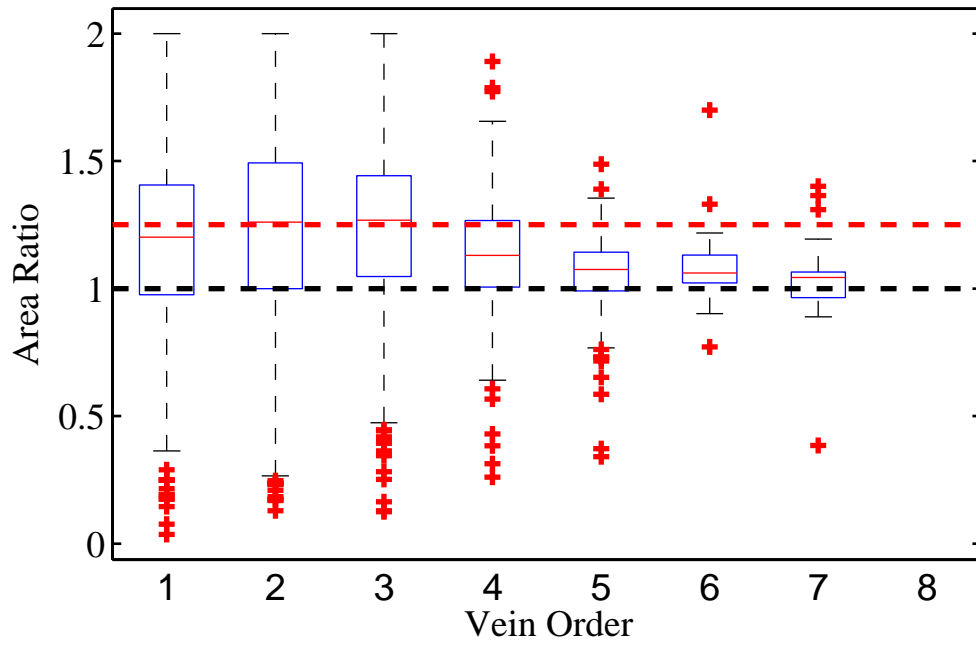

- - - Murrays Law - - - Elastic Similarity

*Rawsonia usambarensis* Engl. & Gilg

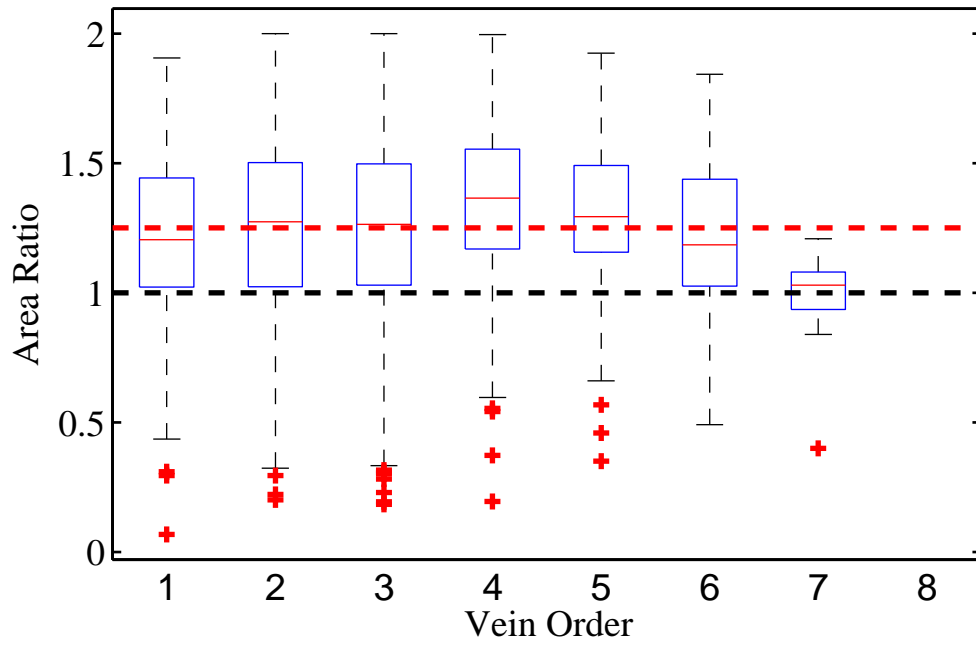

- - - Murrays Law - - - Elastic Similarity

*Arrabidaea lundellii* Standl.

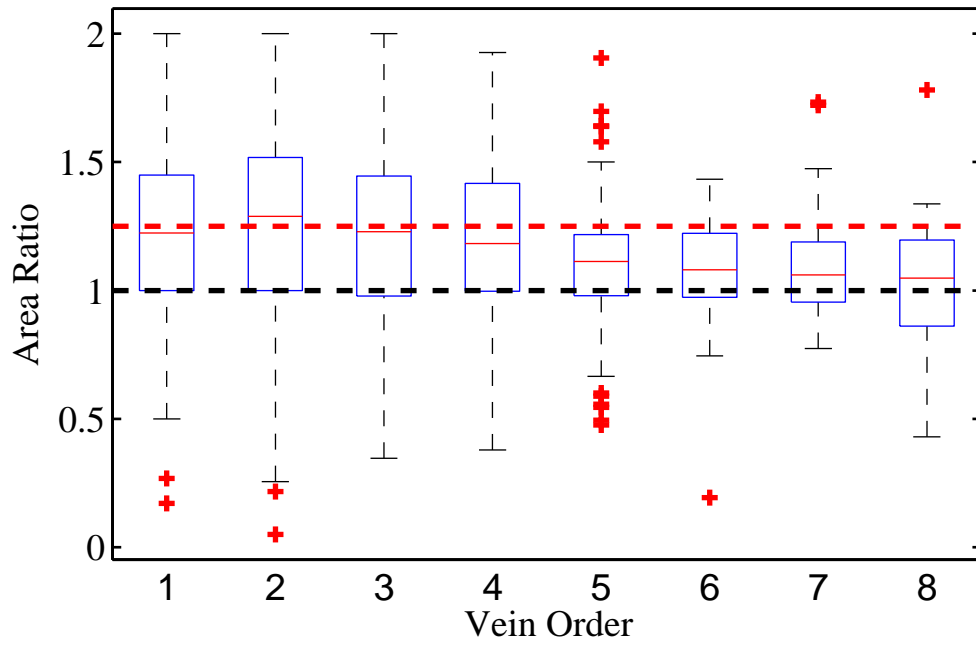



- - - Murrays Law   - - - Elastic Similarity

*Betula davurica* Pallas

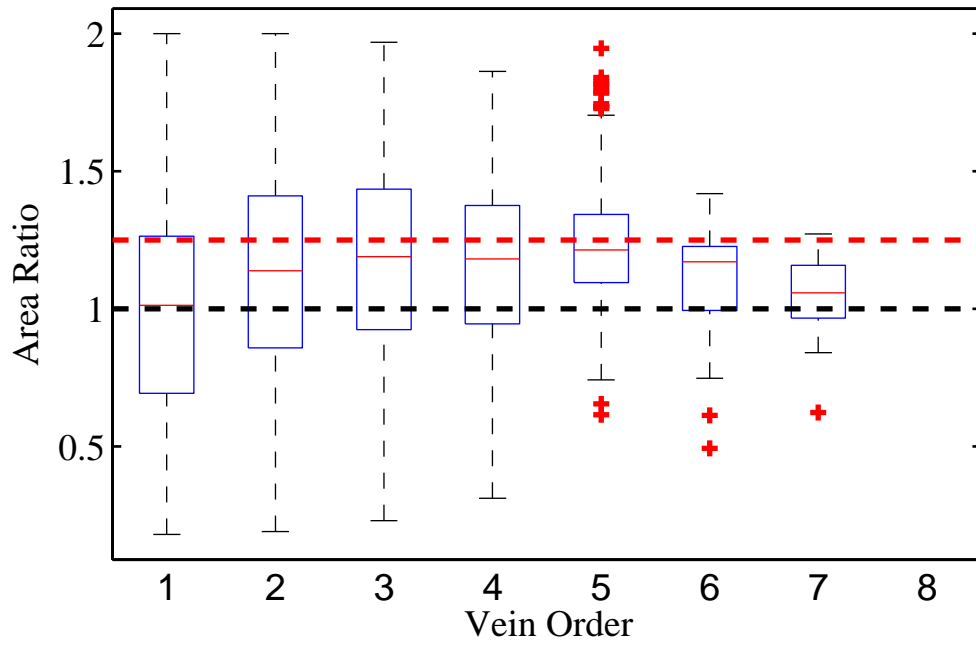

- - - Murrays Law - - - Elastic Similarity

Davilla lacunosa Mart

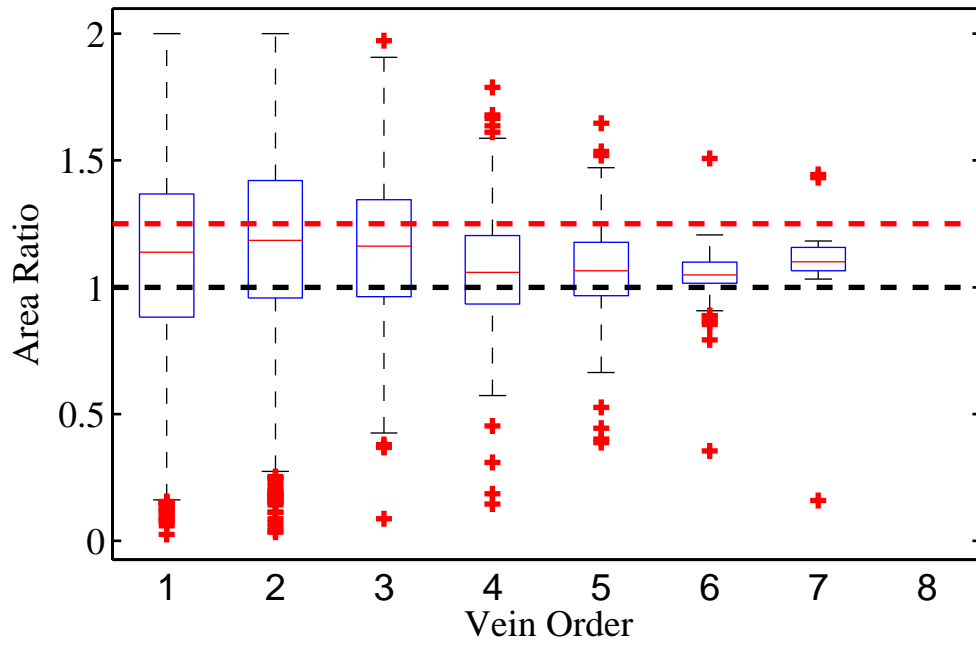

- - - Murrays Law - - - Elastic Similarity

*Parinari capensis*

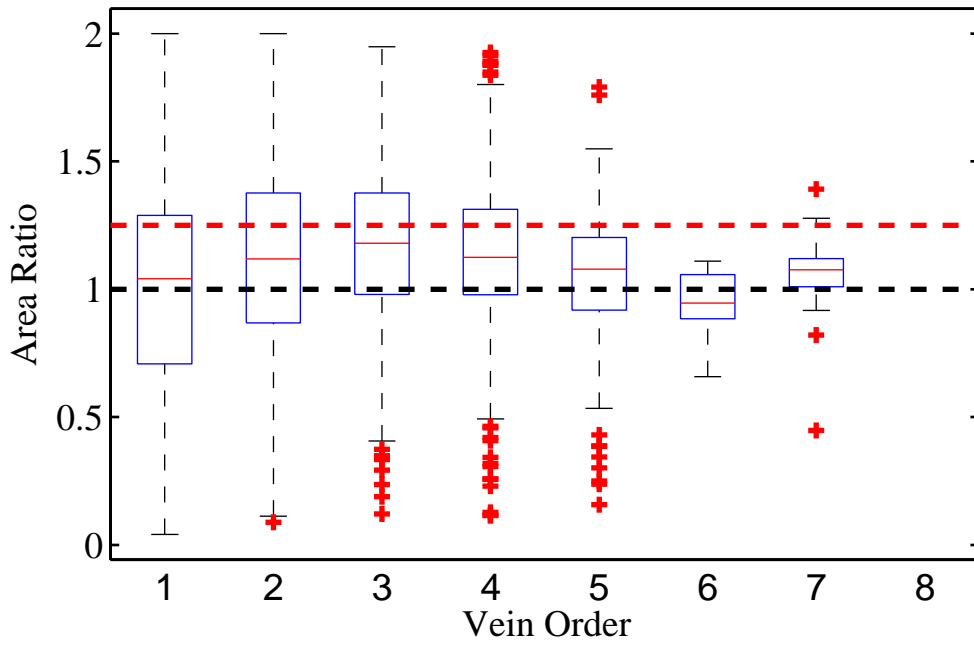

- - - Murrays Law   - - - Elastic Similarity

*Meliosma oldhamii* Mig.

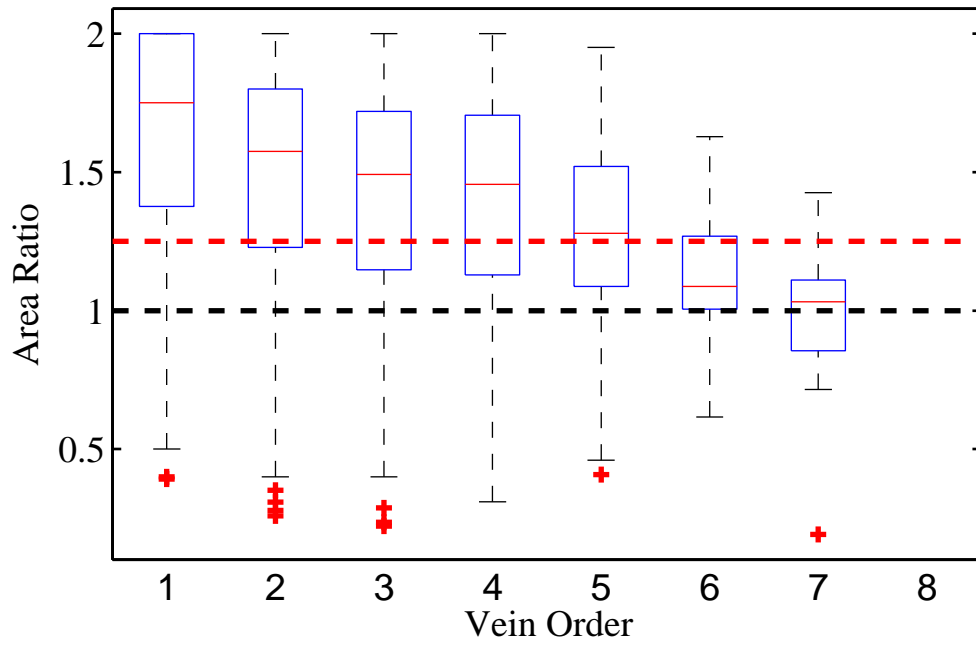

- - - Murrays Law - - - Elastic Similarity

*Daphnopsis occidentalis* (Sw.) Kr. Ex Urb.

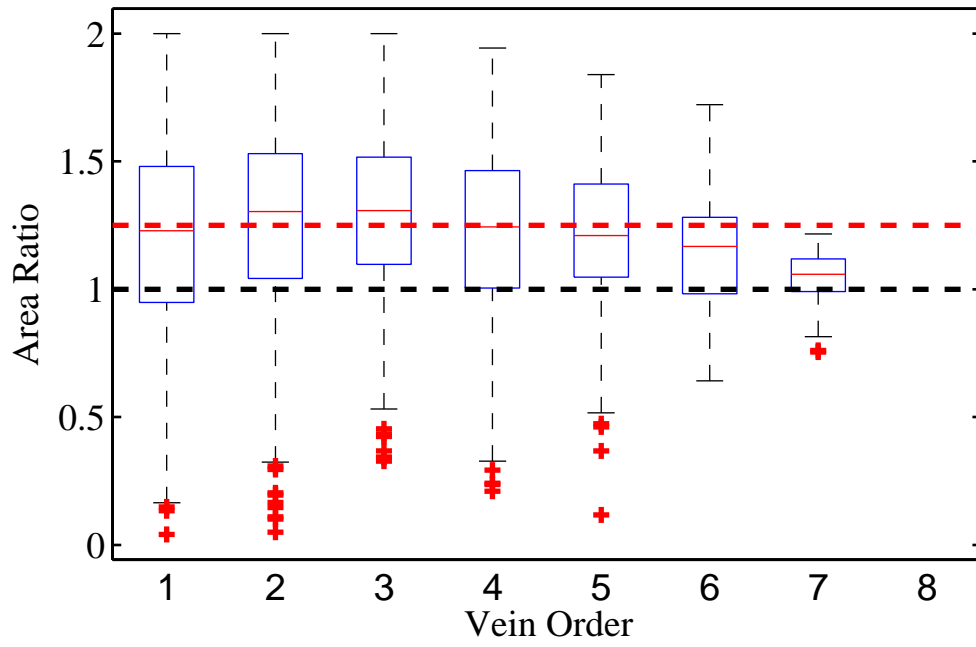

- - - Murrays Law   - - - Elastic Similarity

*Salix pyrolaefolia* Ledeb.

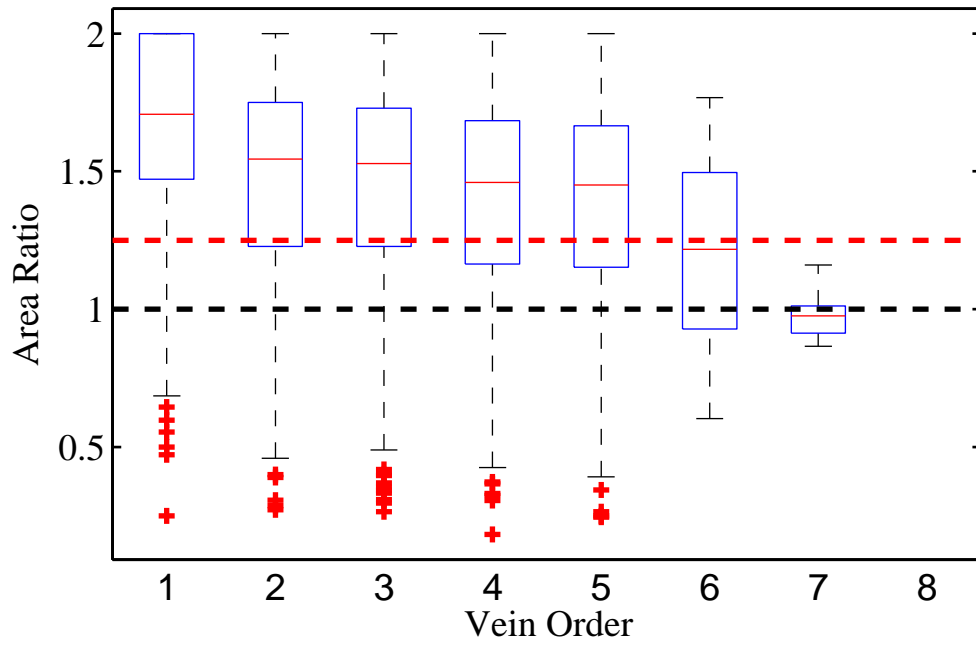

- - - Murrays Law - - - Elastic Similarity

*Quercus cerris* L.

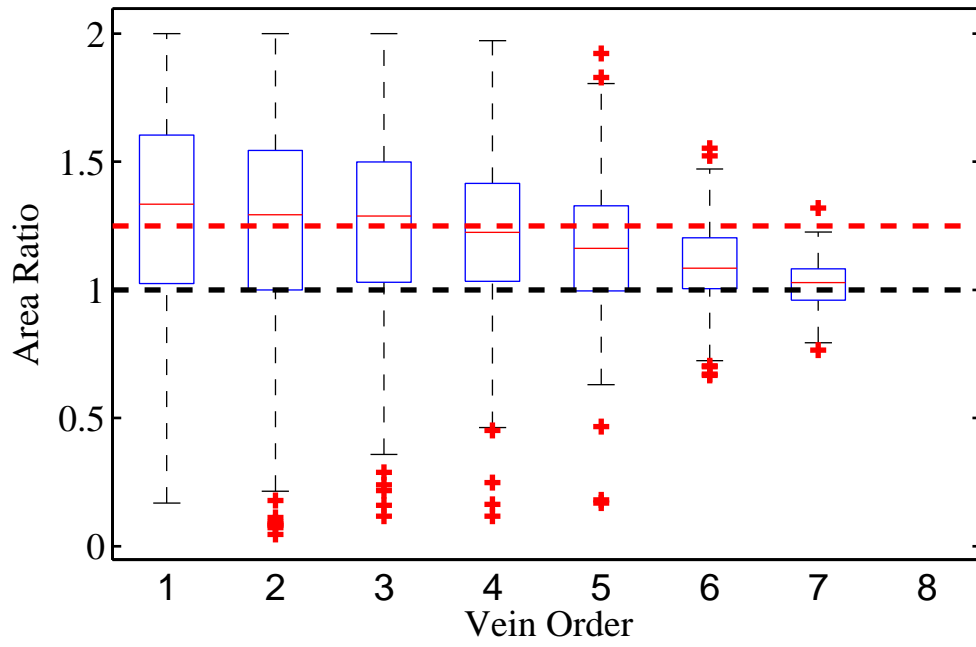

- - - Murrays Law   - - - Elastic Similarity

*Ceratopetalum gummiferum* Sm.

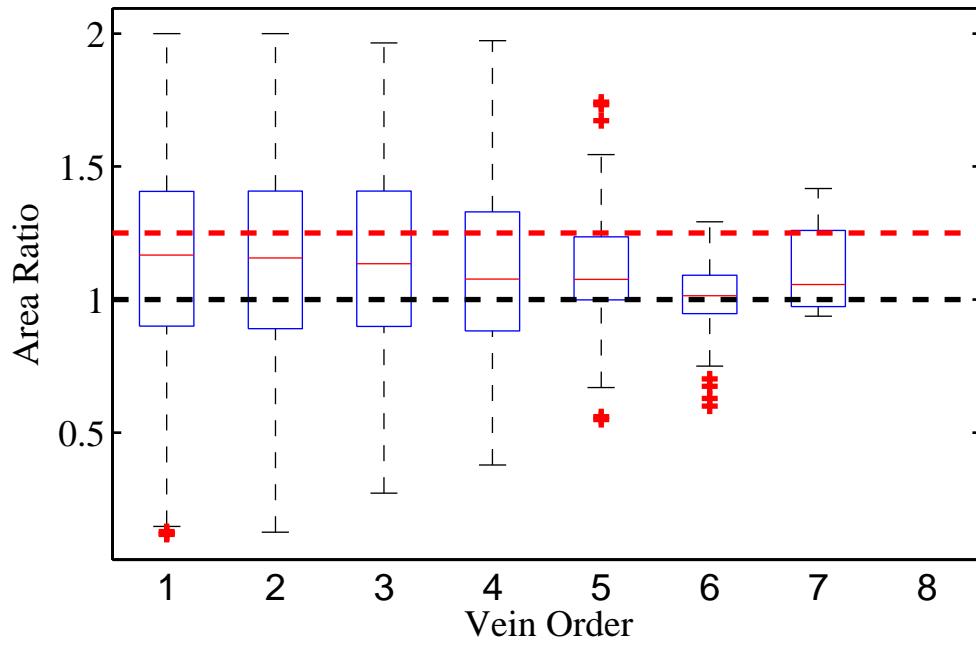



- - - Murrays Law   - - - Elastic Similarity

*Aspidosperma dugandii* Standl.

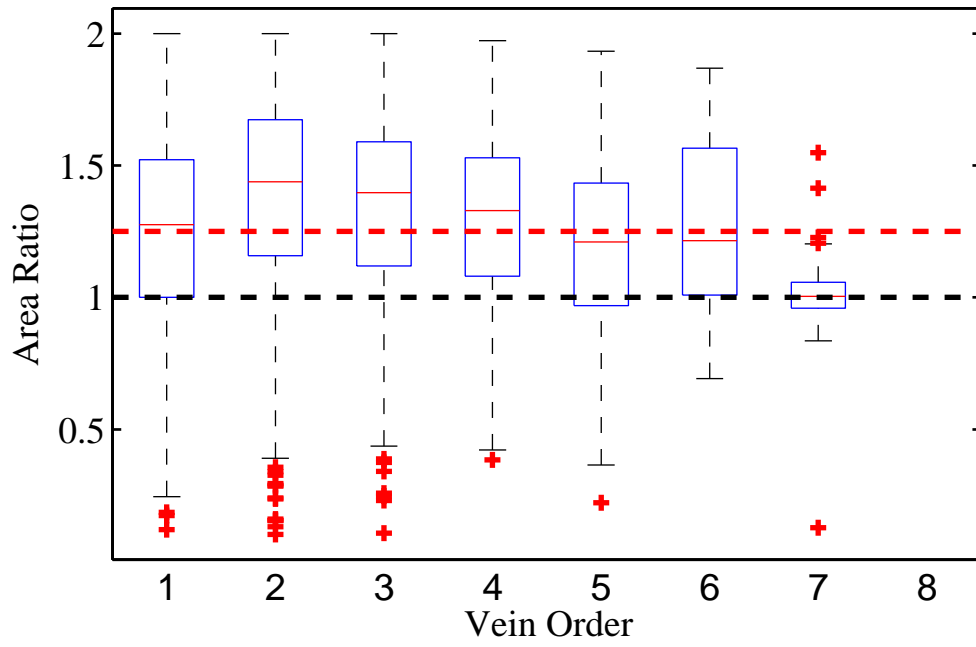

- - - Murrays Law - - - Elastic Similarity

Diospyros pentamera F.M.

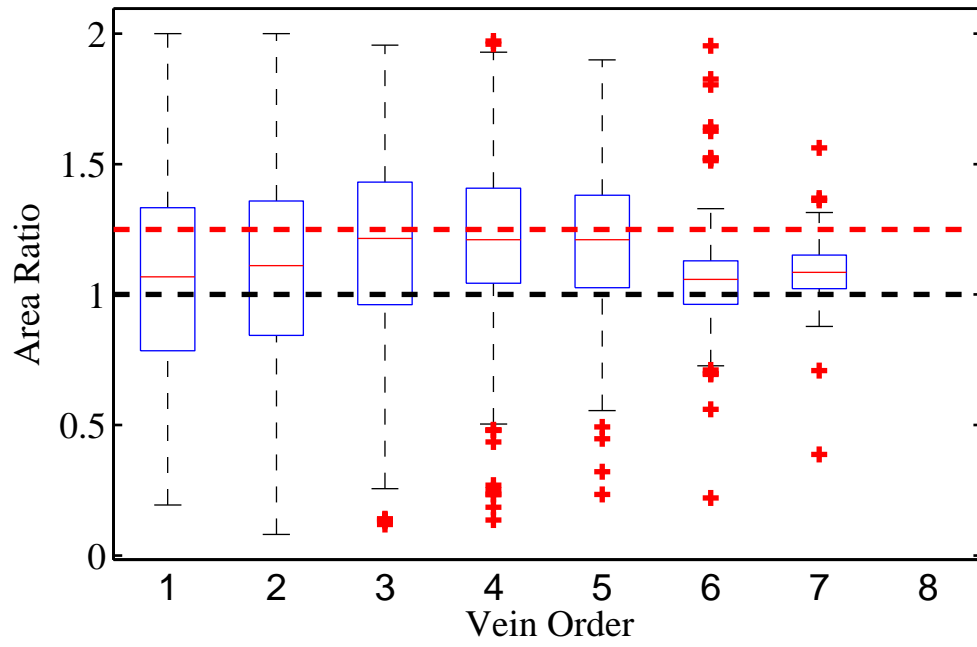

- - - Murrays Law - - - Elastic Similarity

Bursera cf. Dubia Bullock

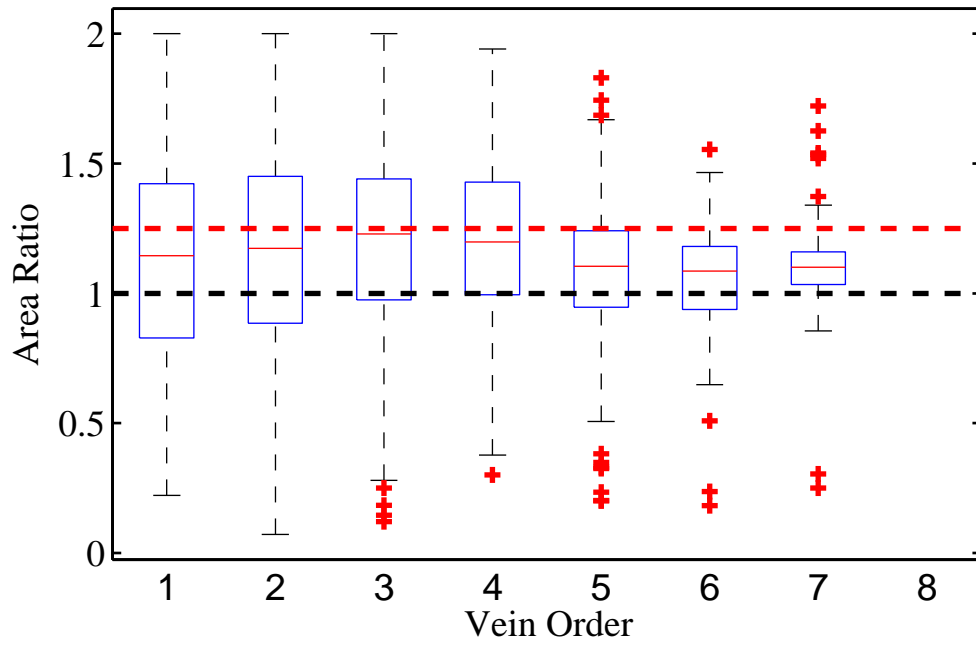

- - - Murrays Law - - - Elastic Similarity

Adenium somalense

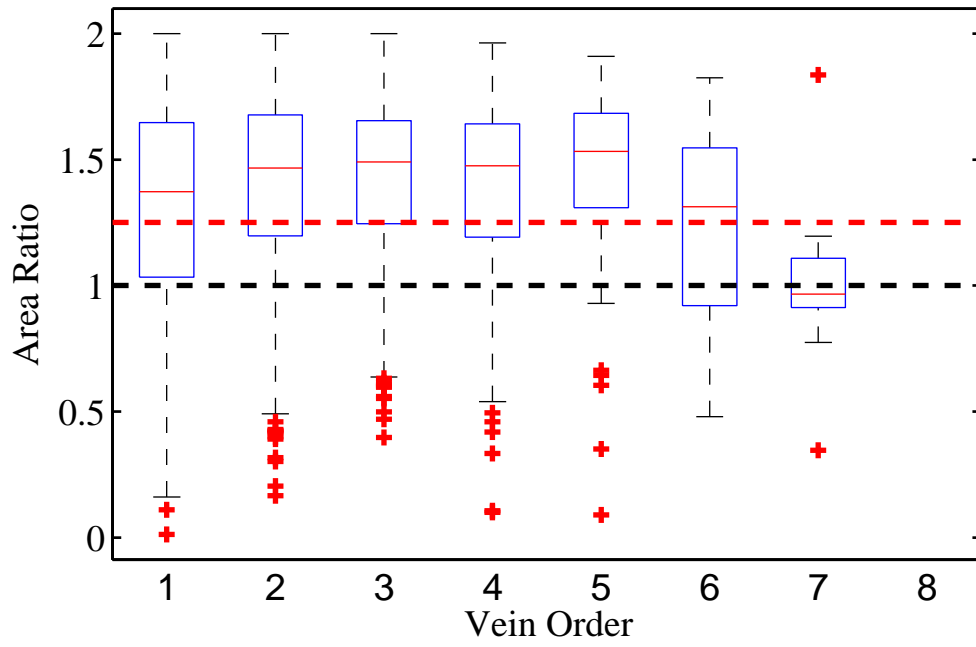

- - - Murrays Law - - - Elastic Similarity

*Acer grosseri*

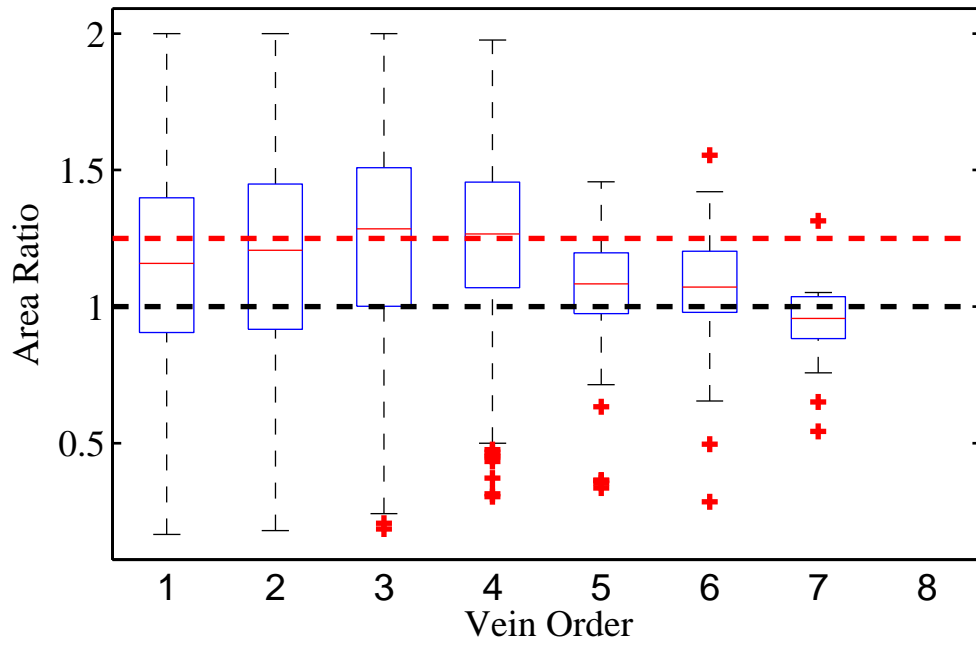

- - - Murrays Law - - - Elastic Similarity

*Crataegus flora Ait.*

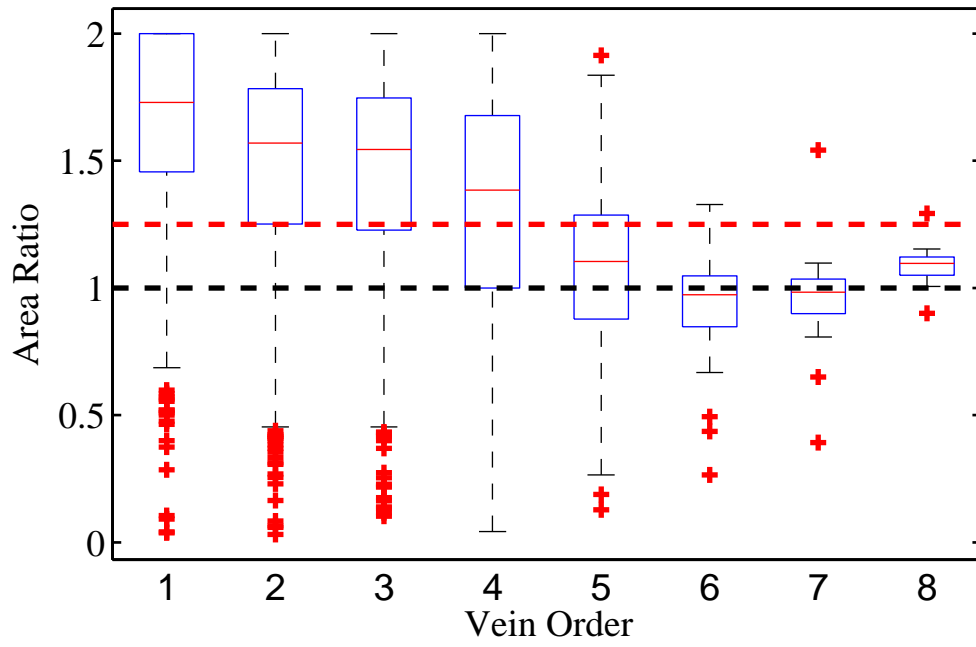

- - - Murrays Law - - - Elastic Similarity

*Cedrelopsis grevei* Baill.

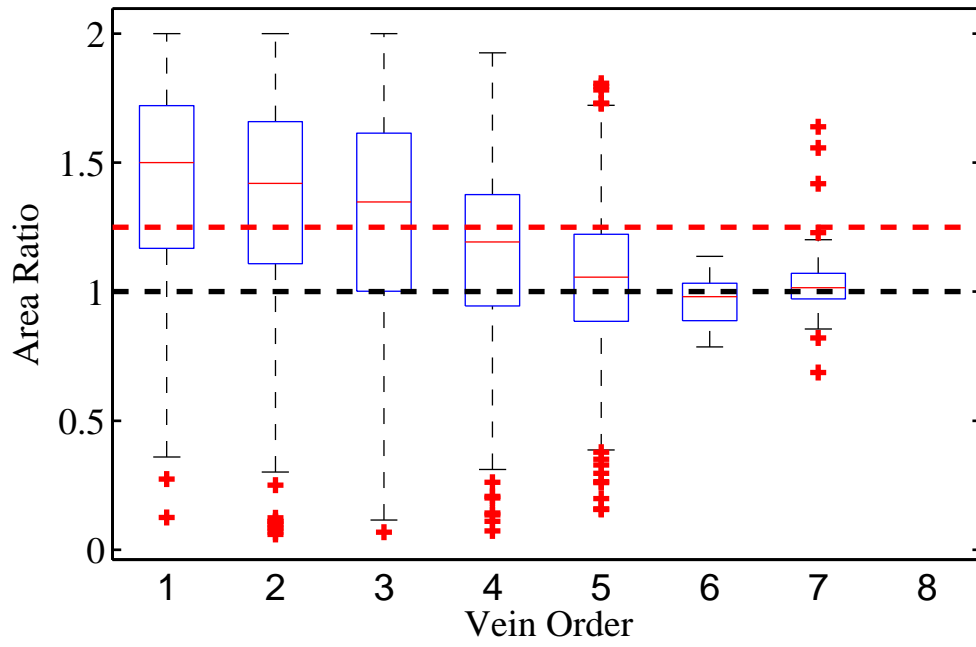

- - - Murrays Law - - - Elastic Similarity

*Acalypha neptunica* Muell. Arg.

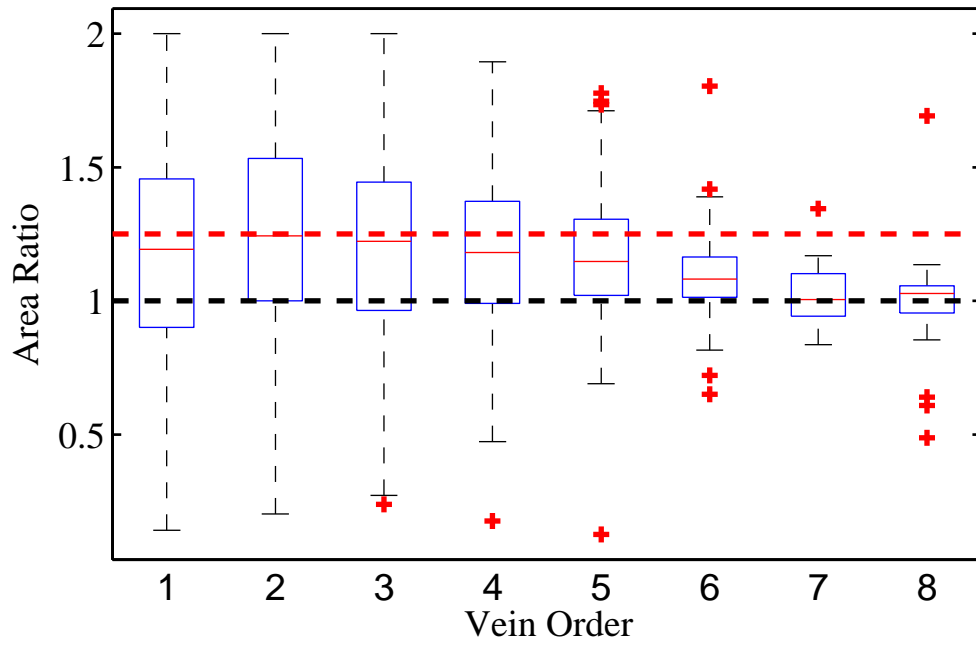



- - - Murrays Law   - - - Elastic Similarity

*Quercus libani* Oliv.

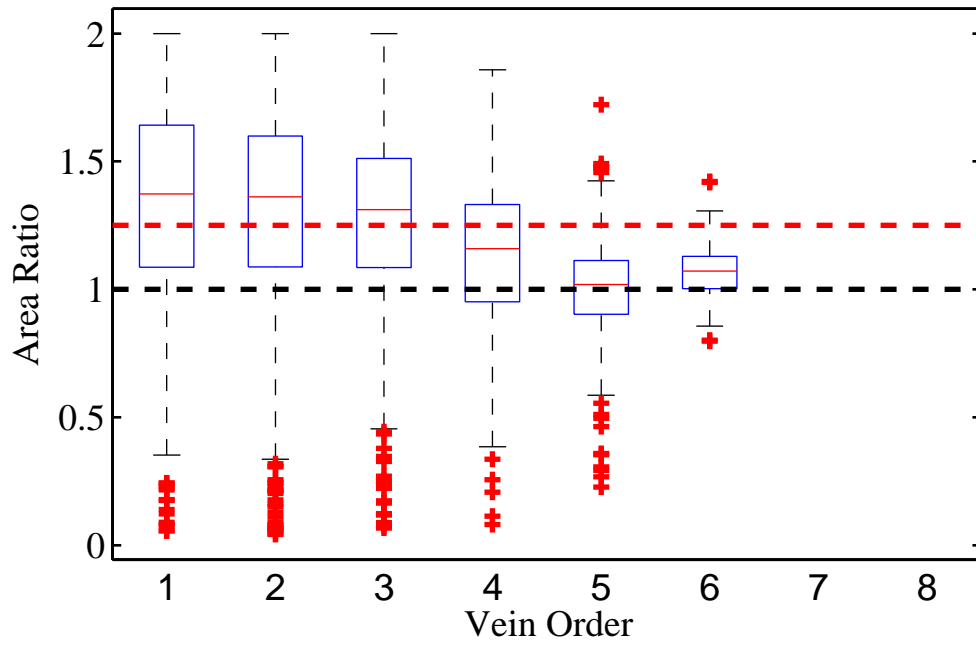

- - - Murrays Law - - - Elastic Similarity

Tina gelonium R. & Sch.

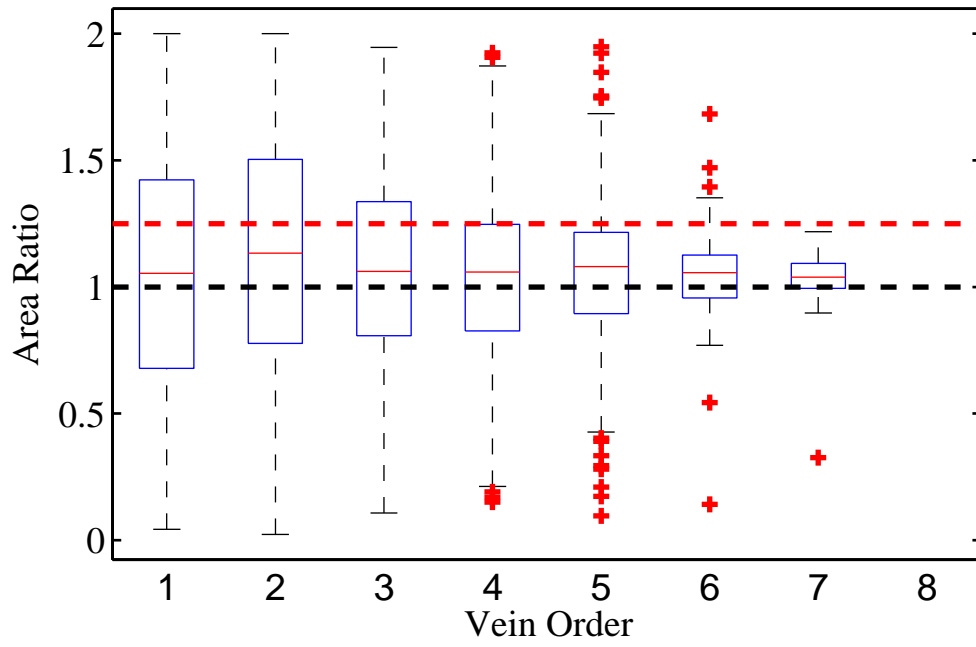

- - - Murrays Law   - - - Elastic Similarity

Vaccinium deliciosum Piper

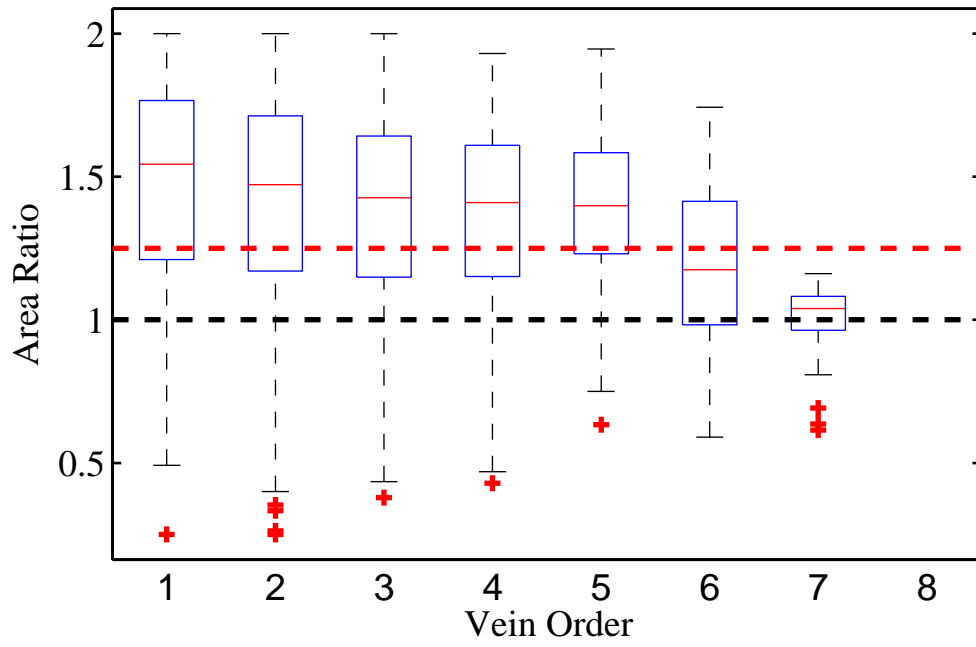

- - - Murrays Law - - - Elastic Similarity

*Aesculus parryi* Gray

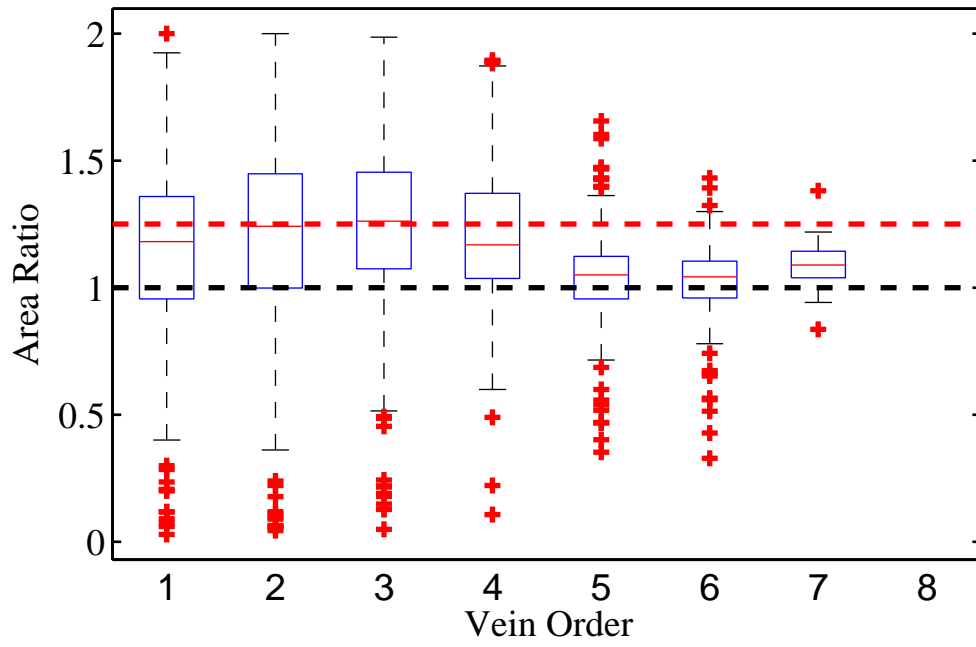

- - - Murrays Law - - - Elastic Similarity

*Fraxinus chinensis* Roxb.

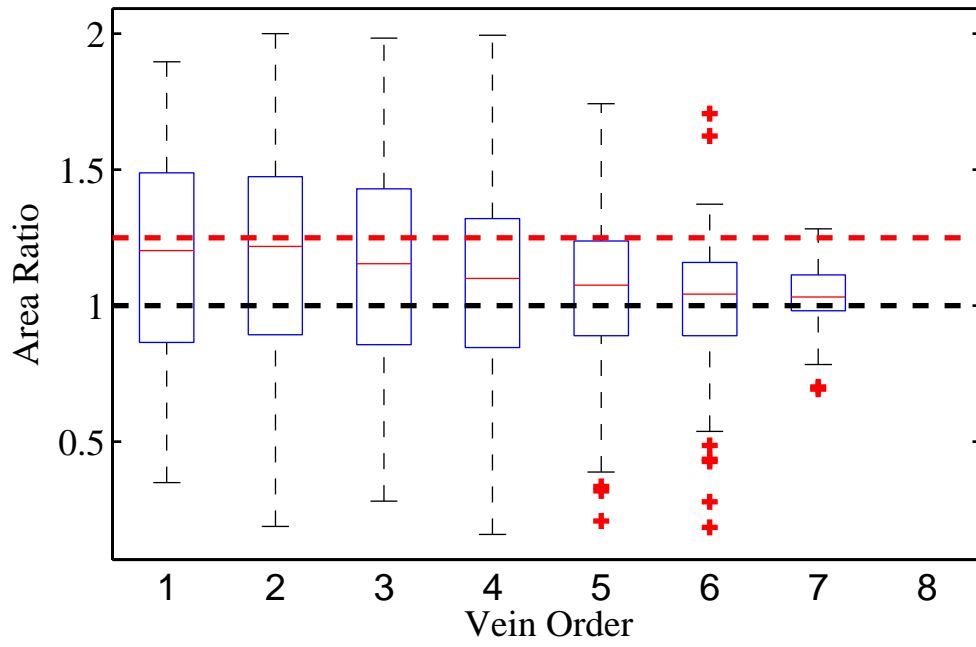

- - - Murrays Law - - - Elastic Similarity

*Rinorea gracilipes* Engl.

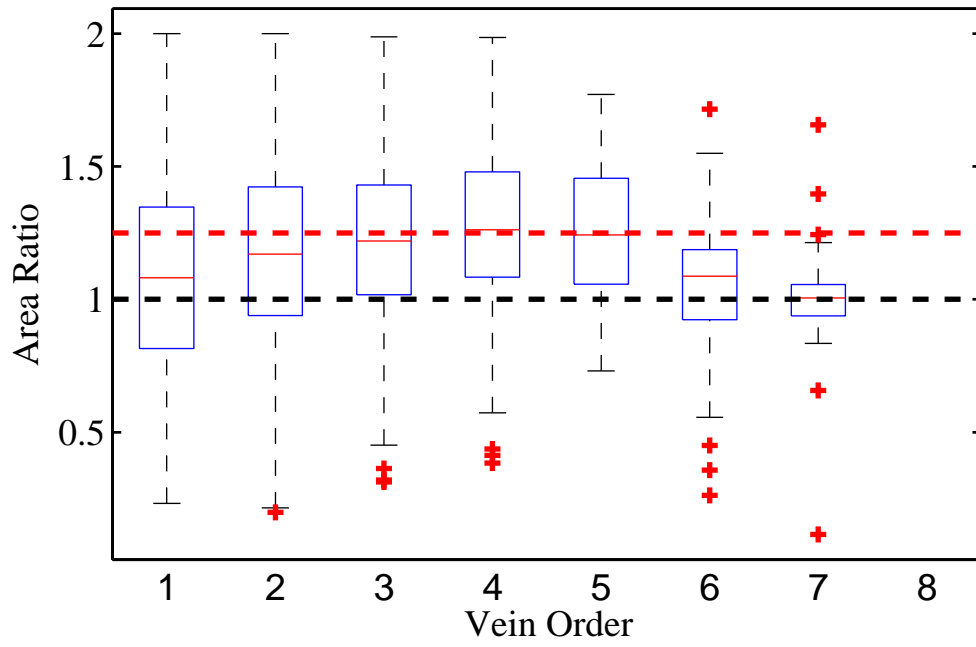

- - - Murrays Law   - - - Elastic Similarity

*Pseudolachnostylis dikindtii* Pax

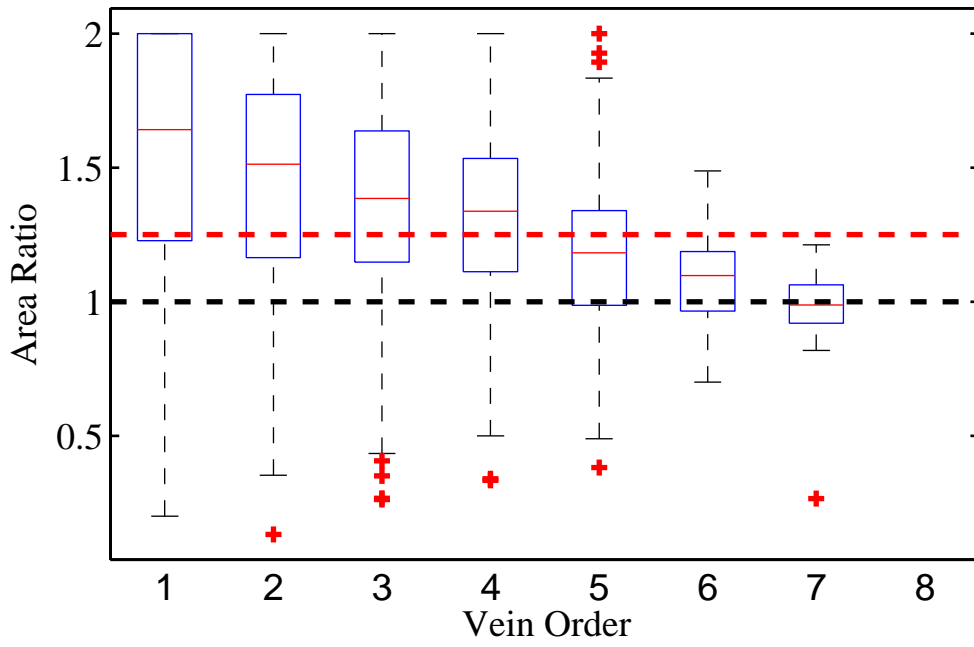

- - - Murrays Law    - - - Elastic Similarity

*Lecythis costaricensis* Pitt.

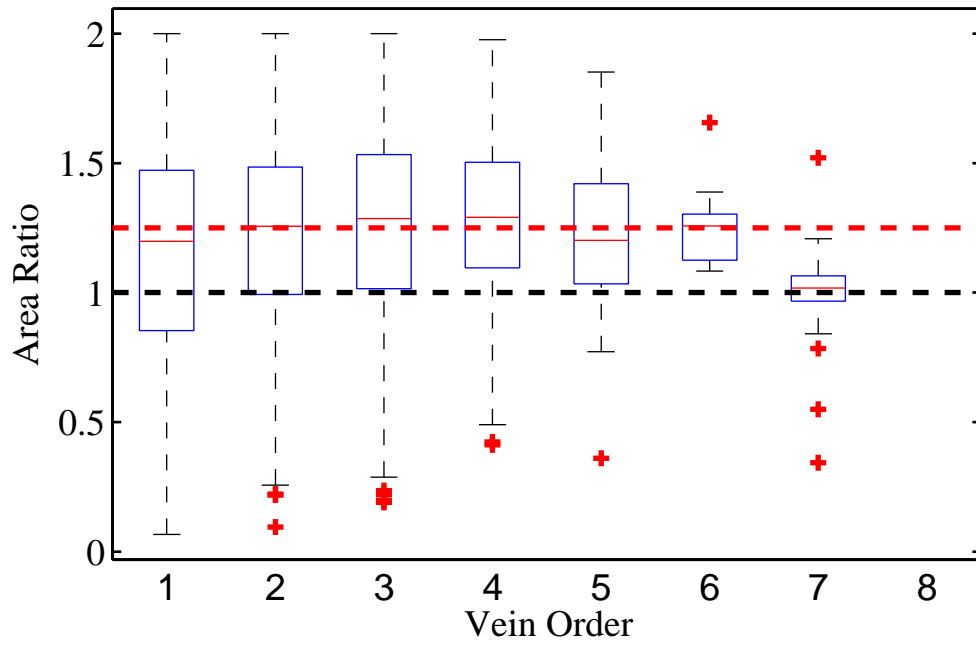



- - - Murrays Law   - - - Elastic Similarity

*Rheedia edulis* (Seem.) Pl. & Tr.

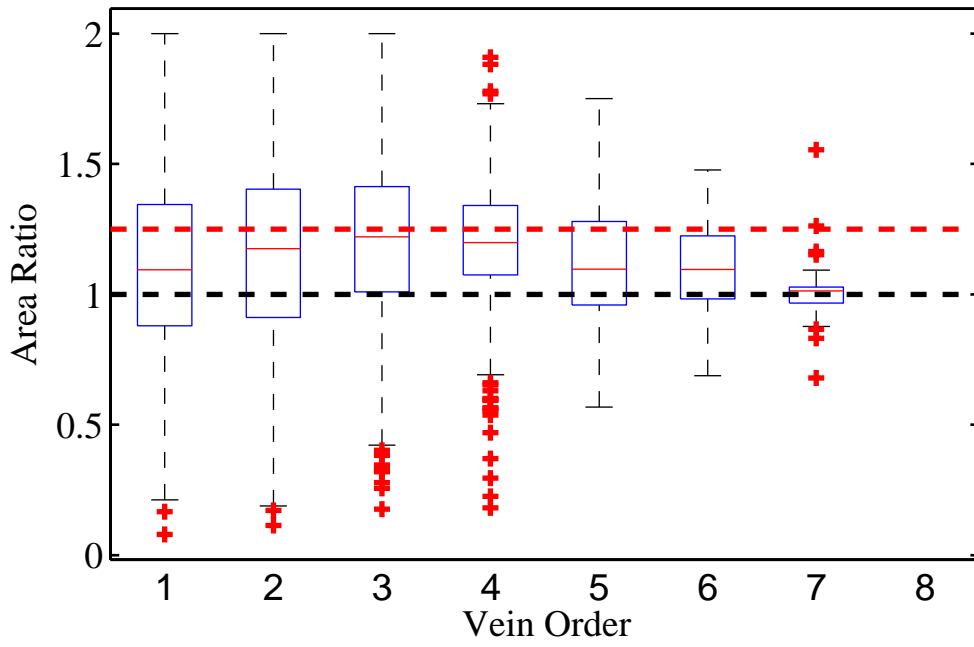

- - - Murrays Law - - - Elastic Similarity

*Chaetoptelea mexicana*

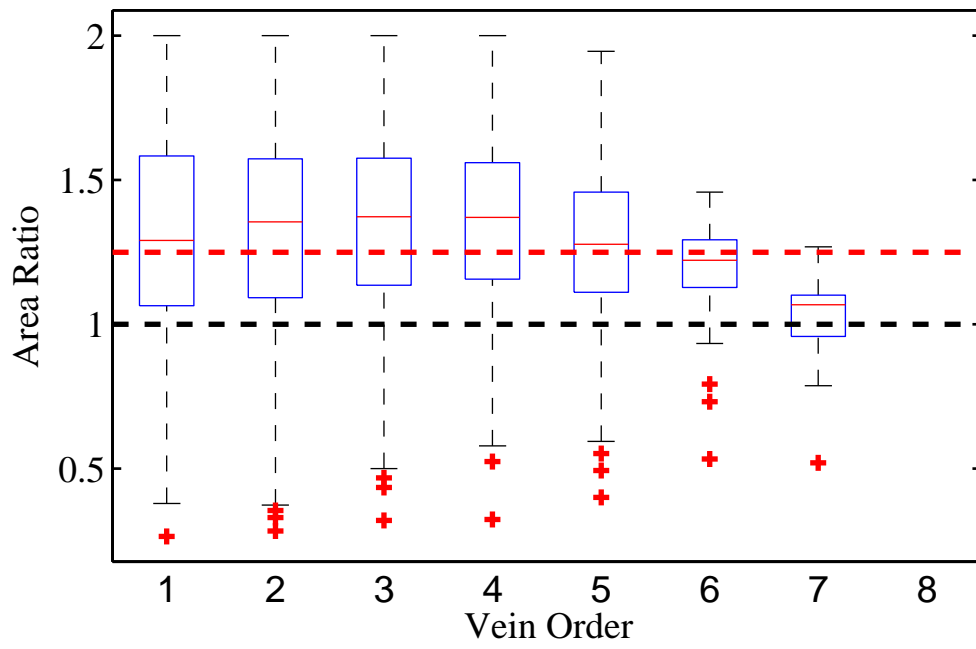

- - - Murrays Law - - - Elastic Similarity

Quercus devia Goldman

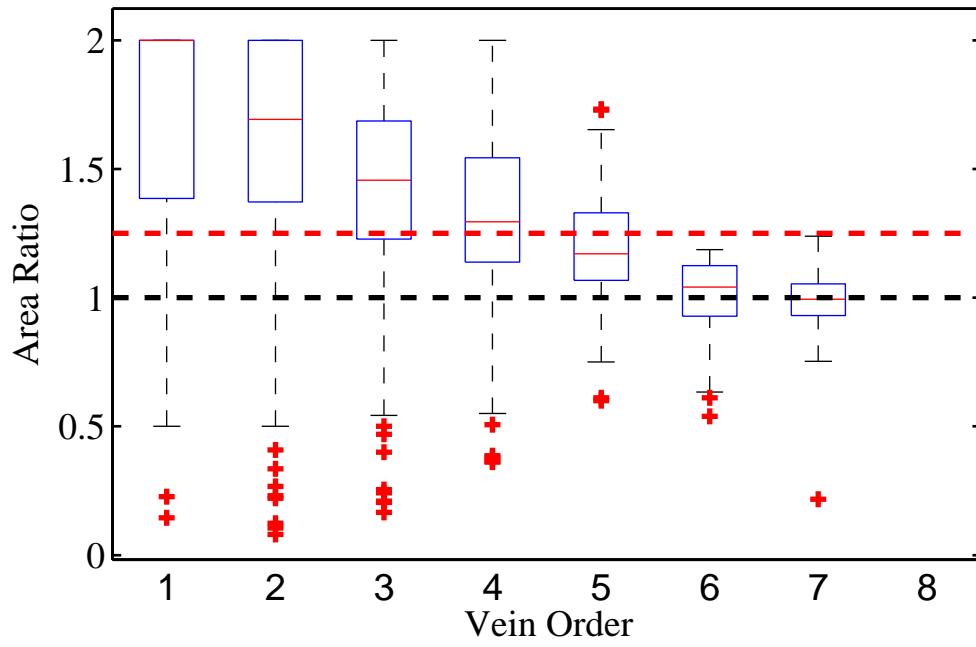

- - - Murrays Law   - - - Elastic Similarity

*Sloanea garckeana* K. Schum.

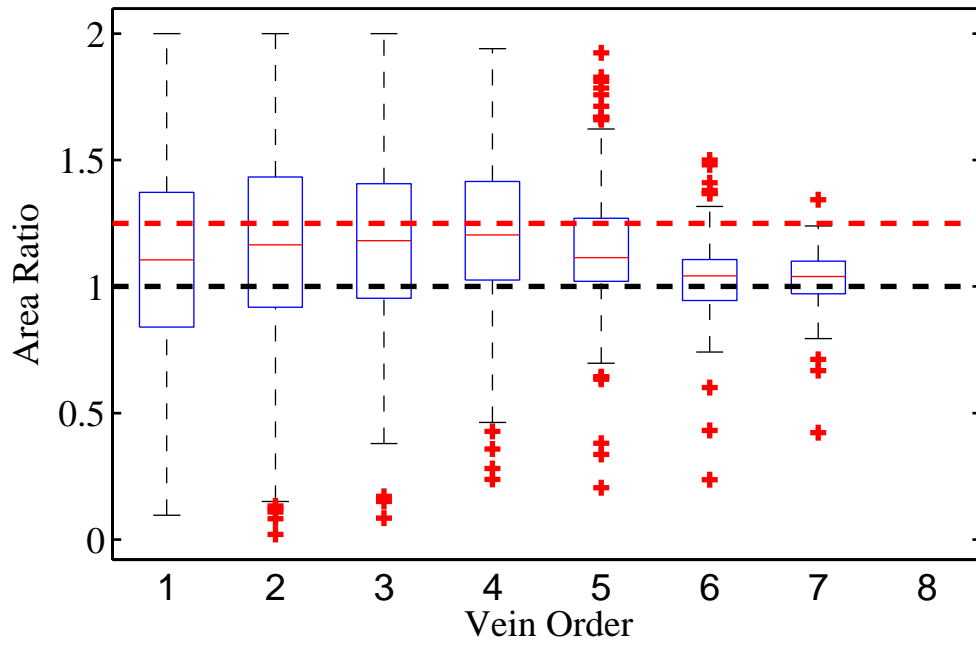

- - - Murrays Law - - - Elastic Similarity

*Synaphea dilatata*

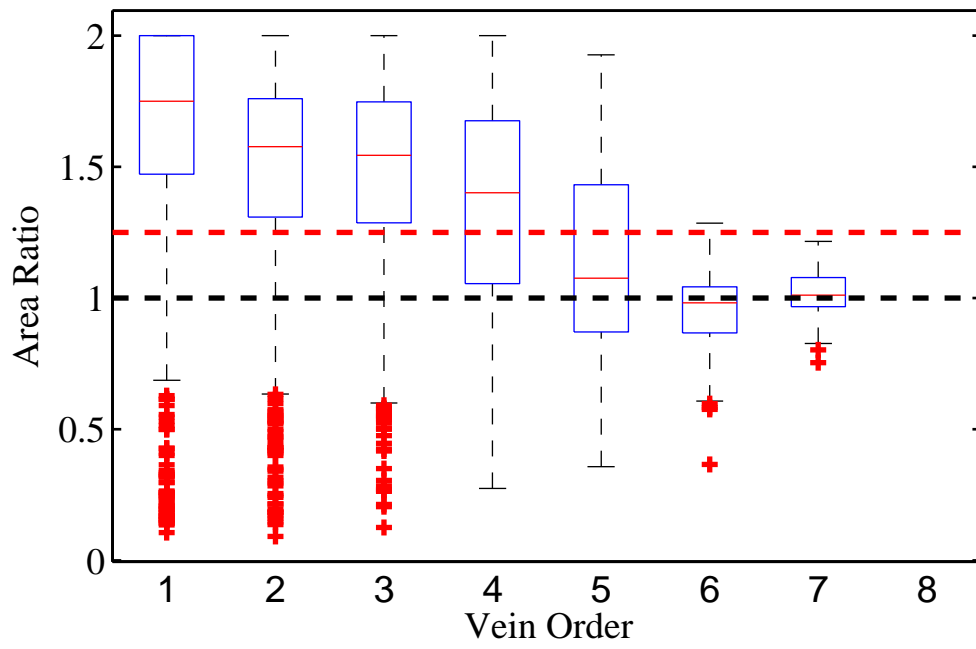

- - - Murrays Law - - - Elastic Similarity

Zenobia pulverulenta (Bartr.) Pollard

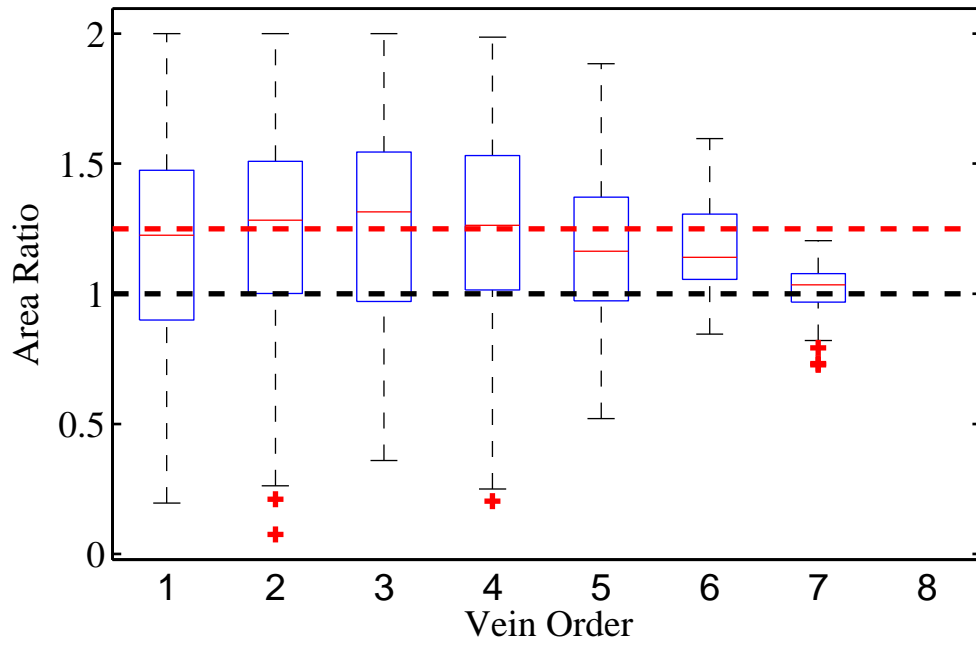

- - - Murrays Law   - - - Elastic Similarity

*Daphnopsis salicifolia* Meissn.

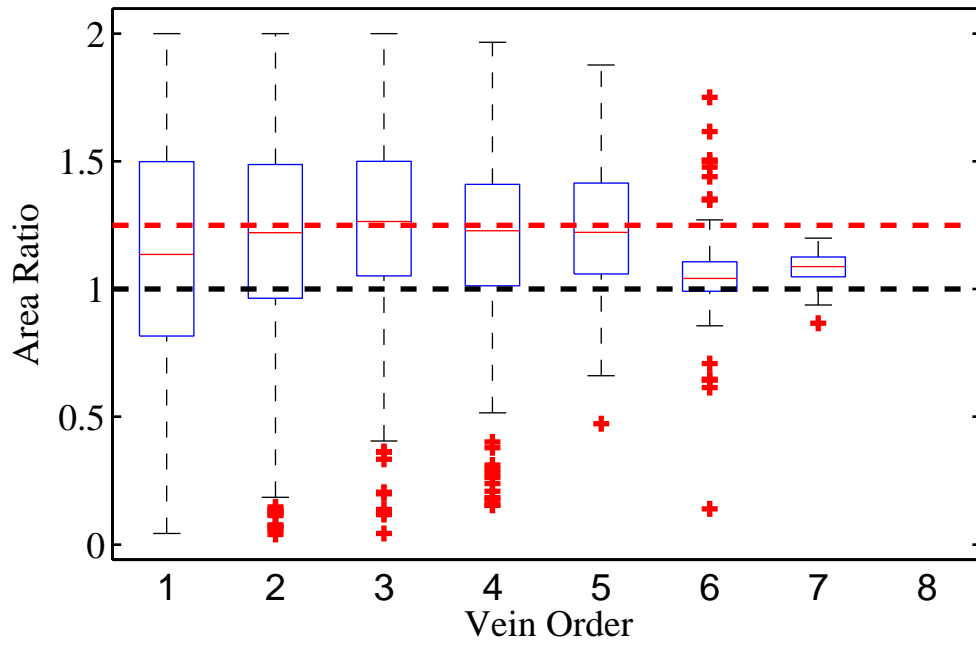

- - - Murrays Law - - - Elastic Similarity

*Elaeocarpus hainanensis* Oliv.

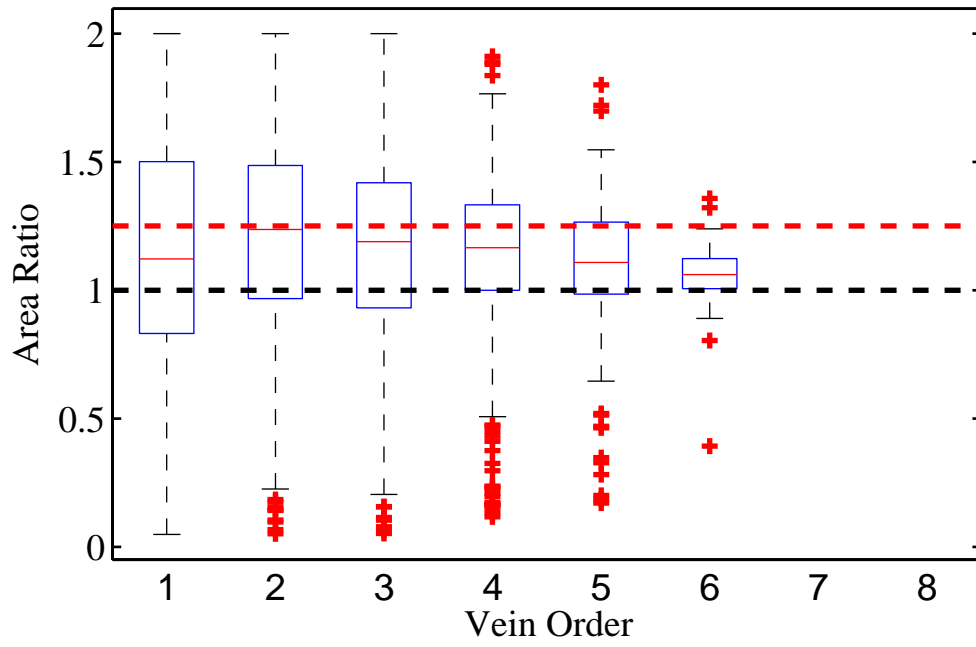



- - - Murrays Law - - - Elastic Similarity

Itea amoena

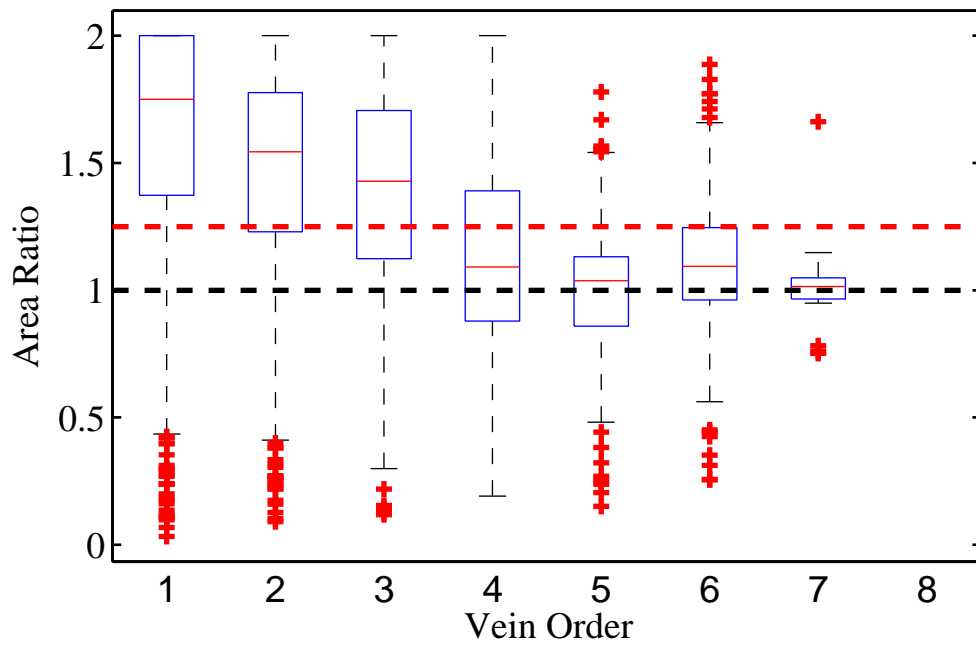

- - - Murrays Law - - - Elastic Similarity

*Turnera arillosa* Urb.

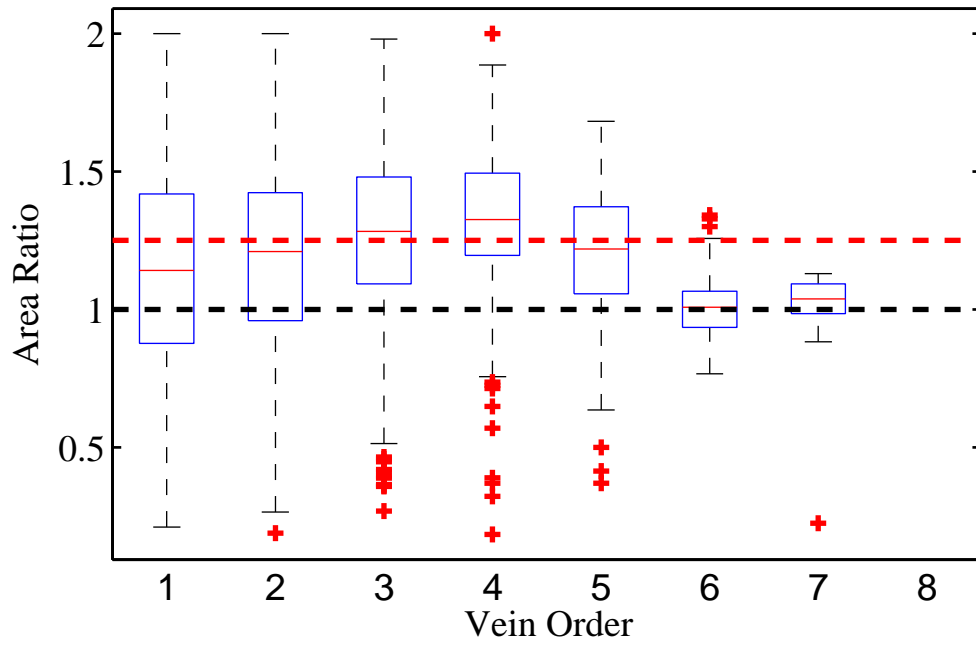

- - - Murrays Law    - - - Elastic Similarity

*Quercus wislizenii* A.Dc

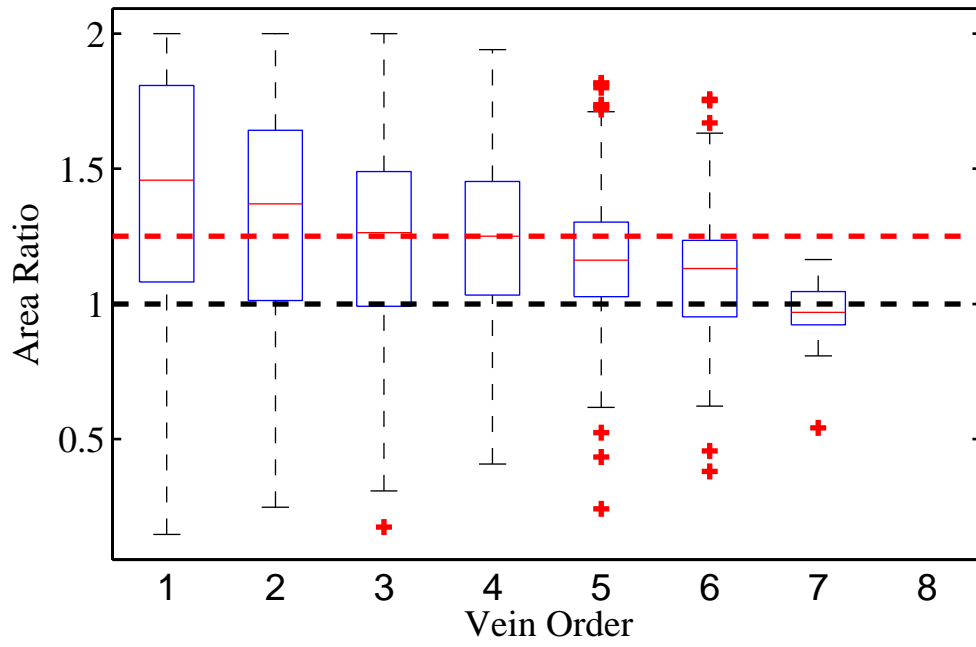

- - - Murrays Law - - - Elastic Similarity

Synaphea flava

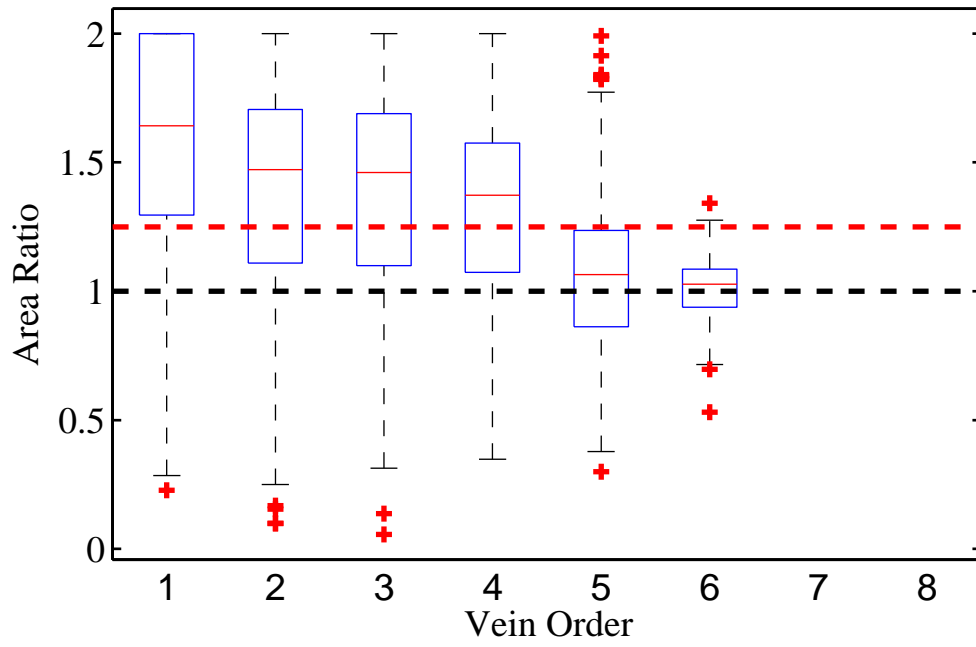

- - - Murrays Law   - - - Elastic Similarity

*Daphnopsis mollis* (C.&S.) Standl.

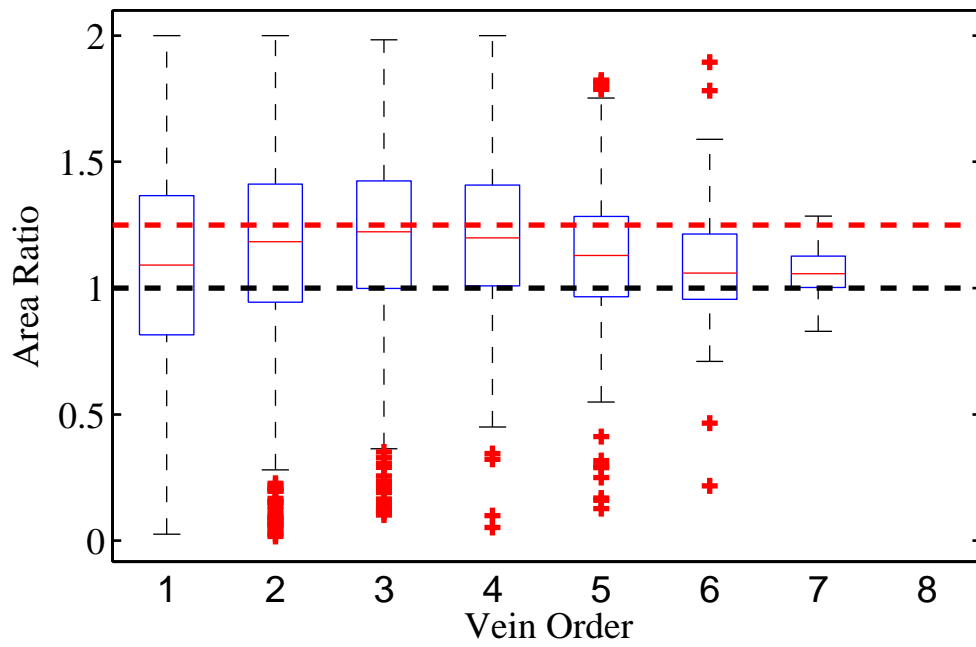

- - - Murrays Law - - - Elastic Similarity

*Annona reticulata* L.

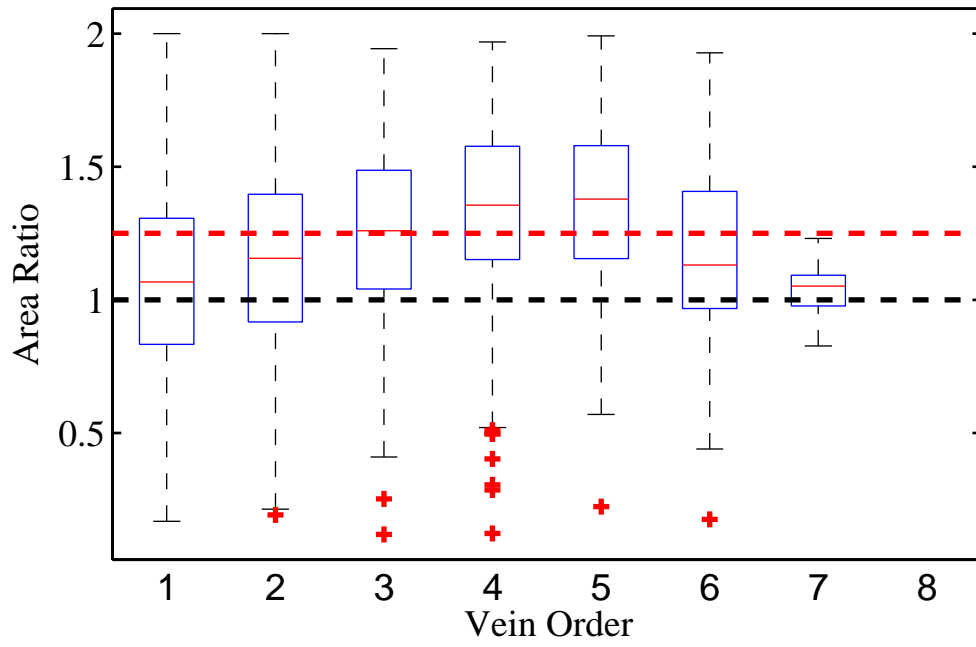

- - - Murrays Law   - - - Elastic Similarity

*Castanopsis sempervirens* (Kell.) Hjelmq.

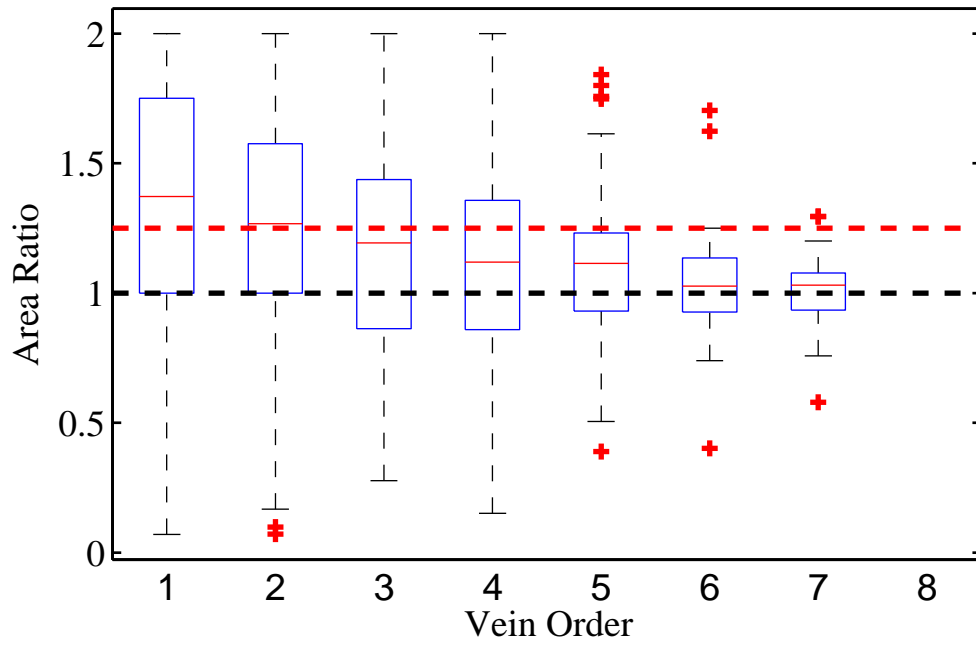

- - - Murrays Law - - - Elastic Similarity

*Quercus saltillensis* Trel.

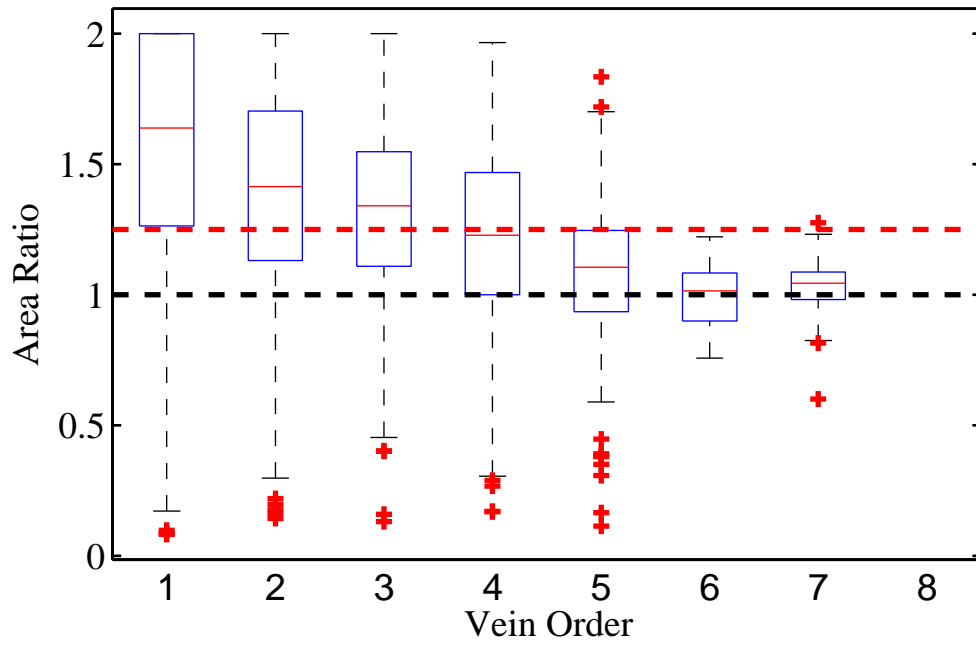



- - - Murrays Law - - - Elastic Similarity

*Clematis pitcheri* (T. & G.) Britt.

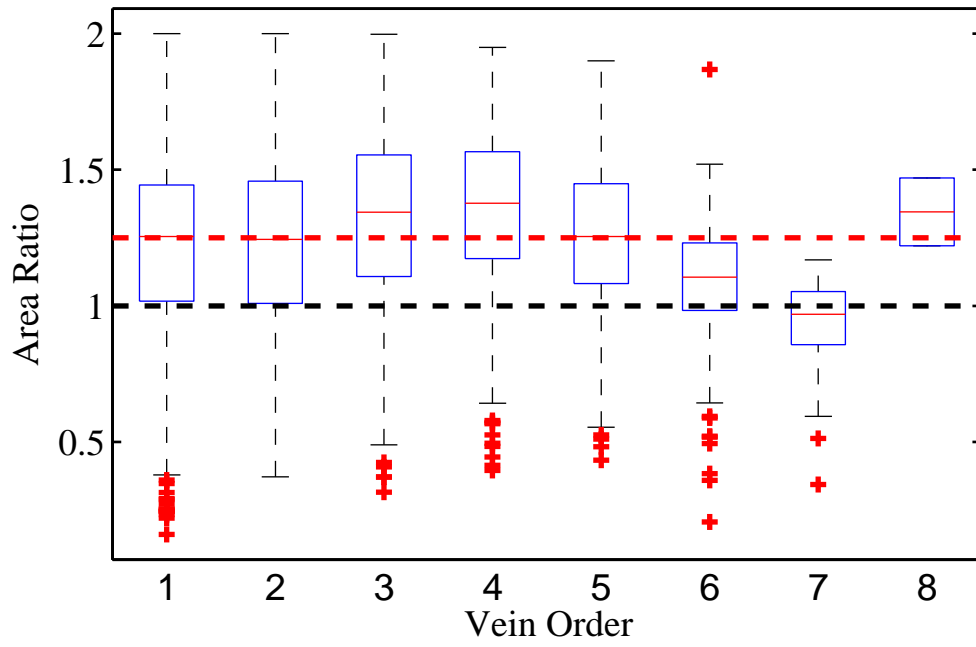

- - - Murrays Law   - - - Elastic Similarity

*Populus fremontii* S. Wats.

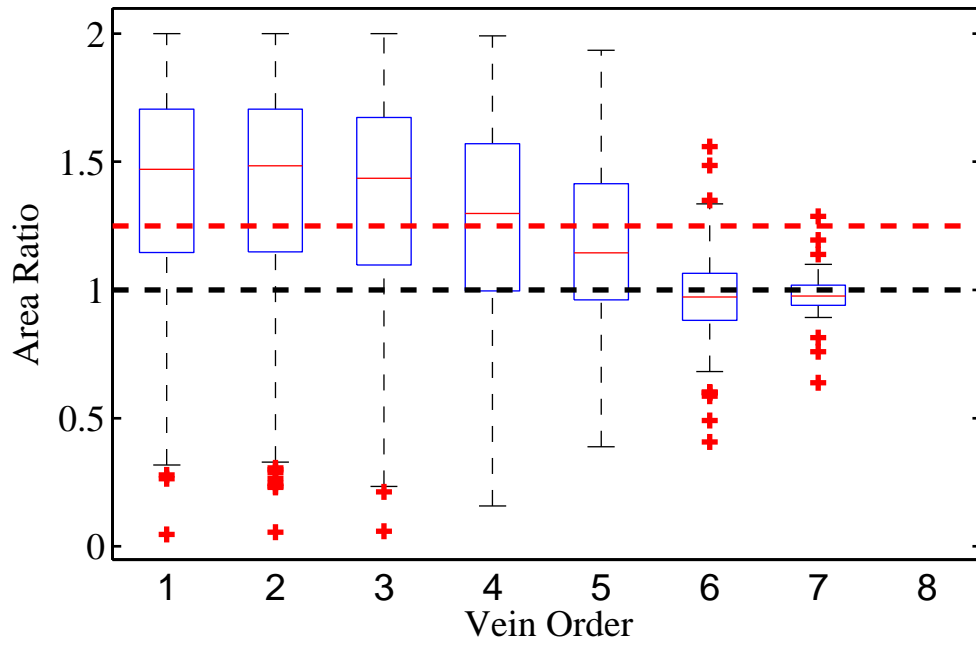

- - - Murrays Law   - - - Elastic Similarity

*Desmostachys longipes* Perr.

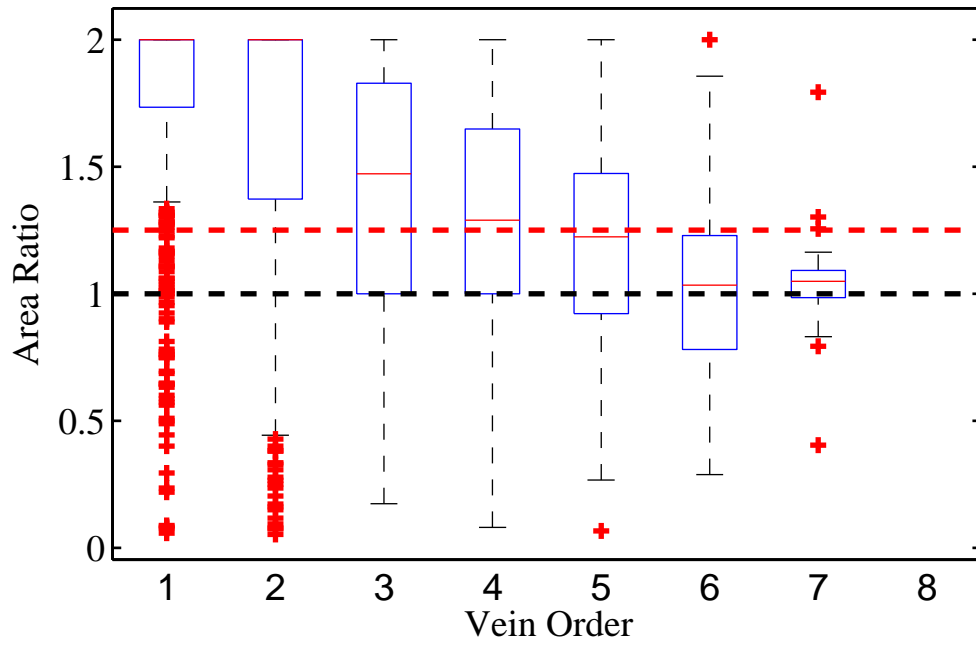

- - - Murrays Law - - - Elastic Similarity

*Diospyros mespiliformis* Hochst. Ex A.Dc.

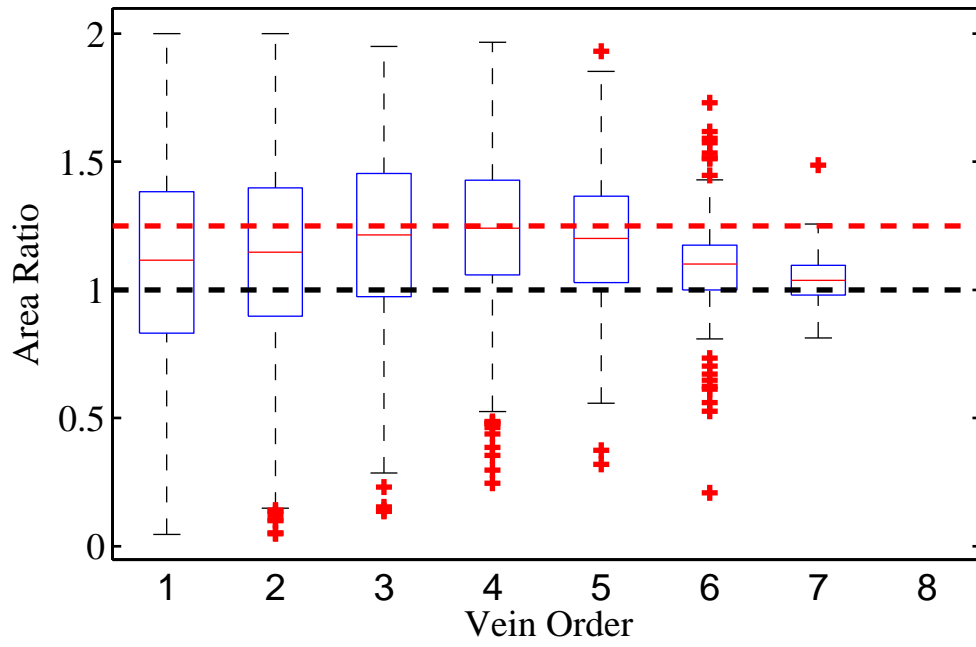

- - - Murrays Law - - - Elastic Similarity

*Drimys piperita* Hook.F.

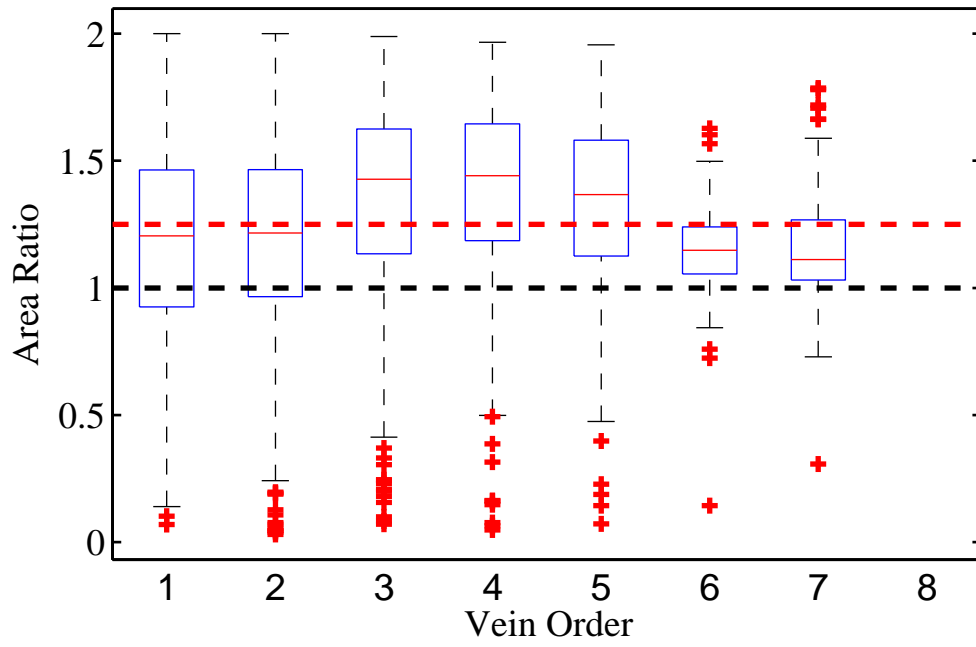

- - - Murrays Law   - - - Elastic Similarity

*Securinega? virosa* (Roxb. Ex Willd.)

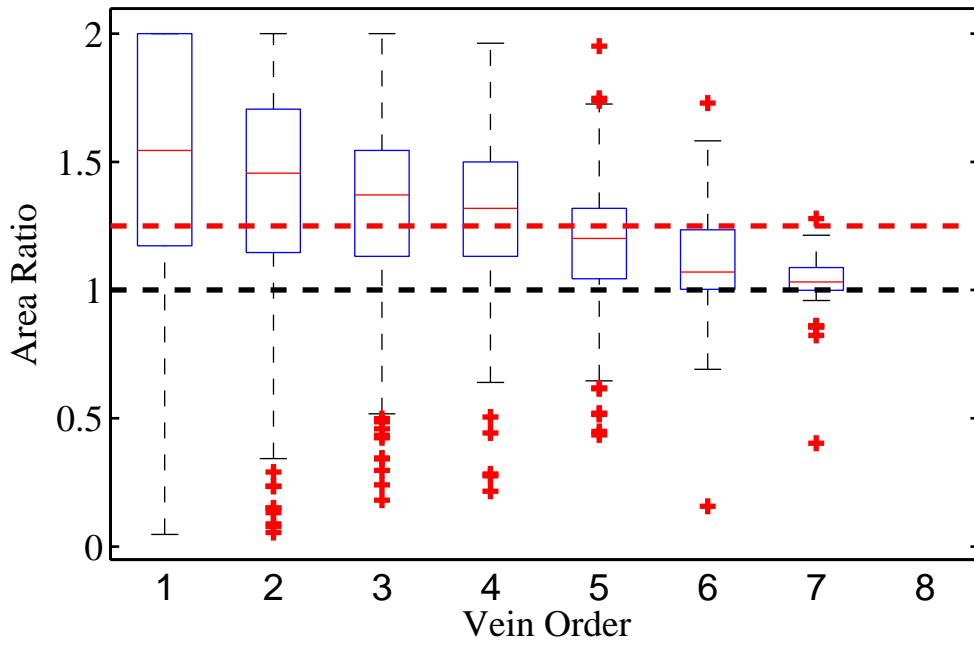

- - - Murrays Law   - - - Elastic Similarity

*Sapium oligoneuron* Schm. & Pitt.

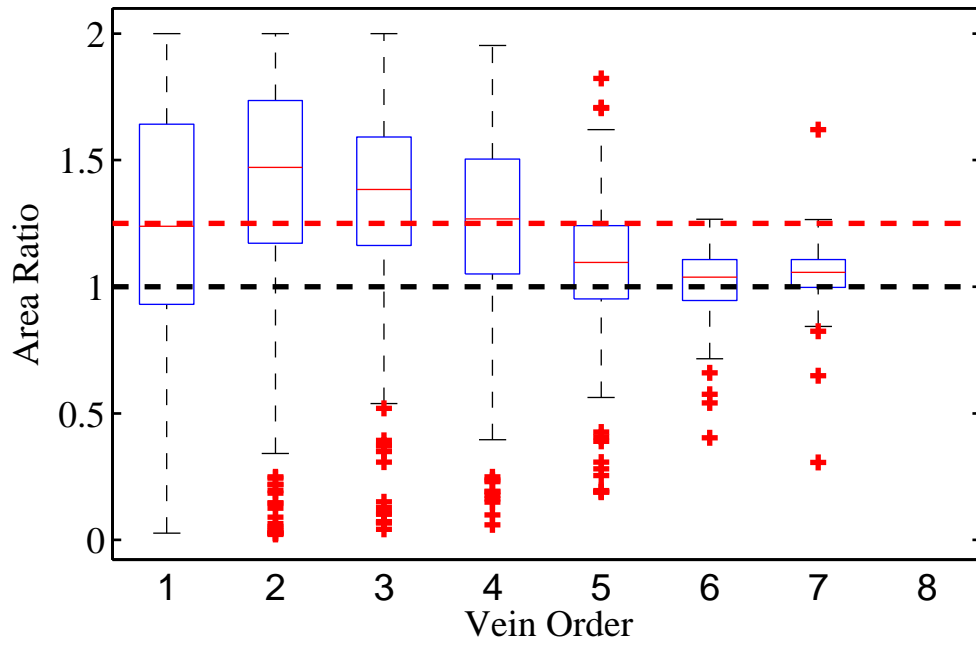

- - - Murrays Law   - - - Elastic Similarity

*Ochna pulchra* Hook. F.

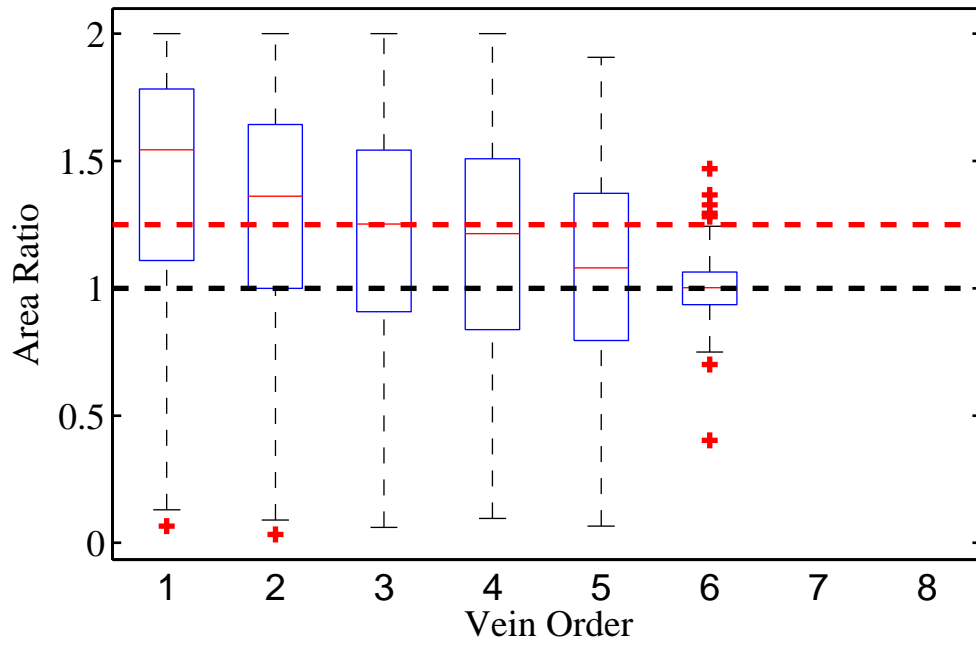



- - - Murrays Law - - - Elastic Similarity

*Populus trichocarpa* T & G

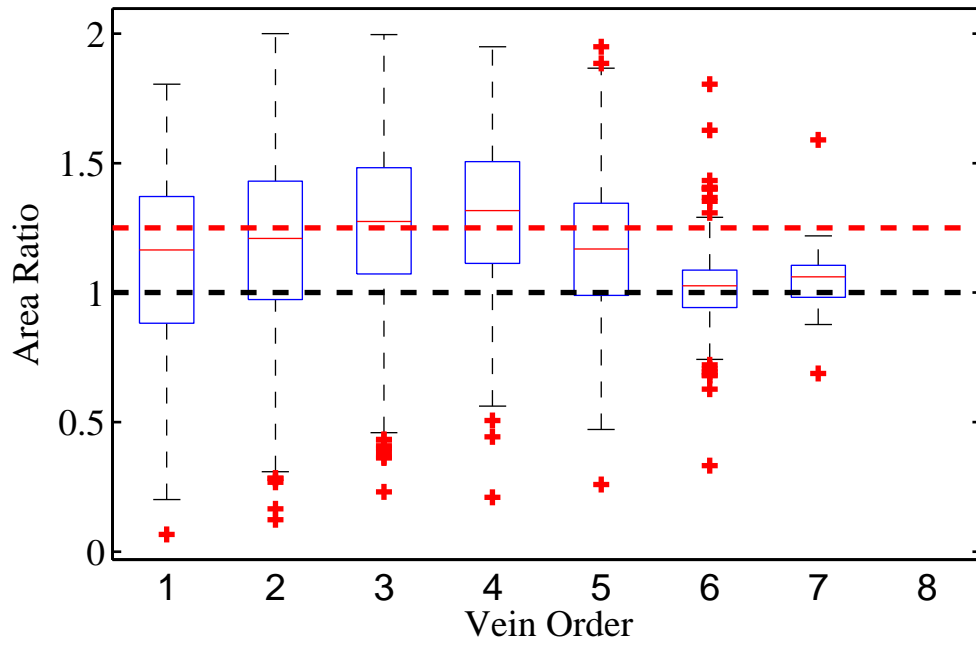

- - - Murrays Law   - - - Elastic Similarity

*Erythroxyllum bequaertii* Standl.

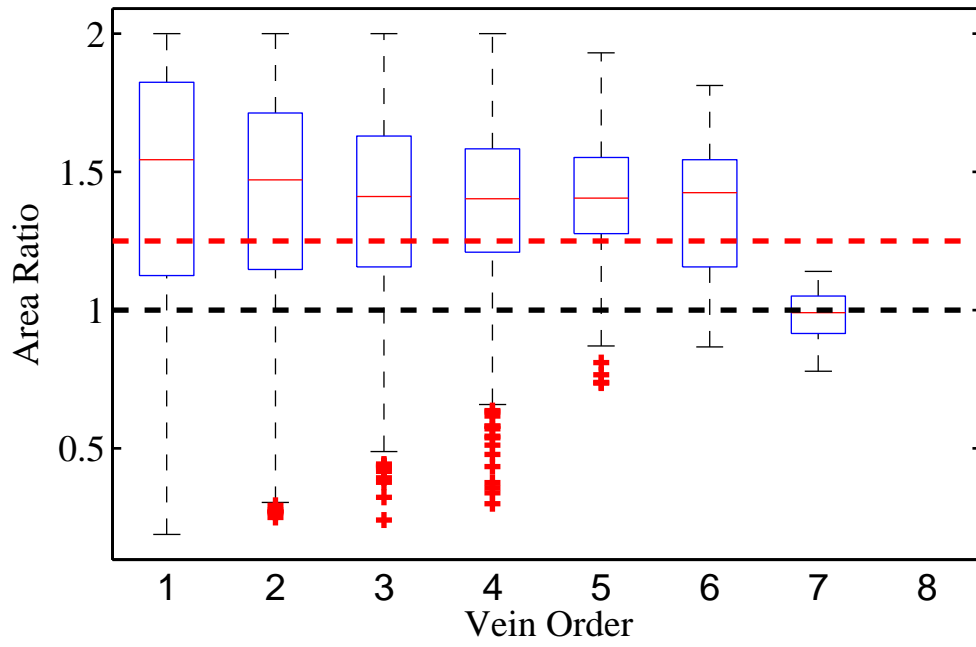

- - - Murrays Law   - - - Elastic Similarity

*Elaeocarpus knuthii* Merr.

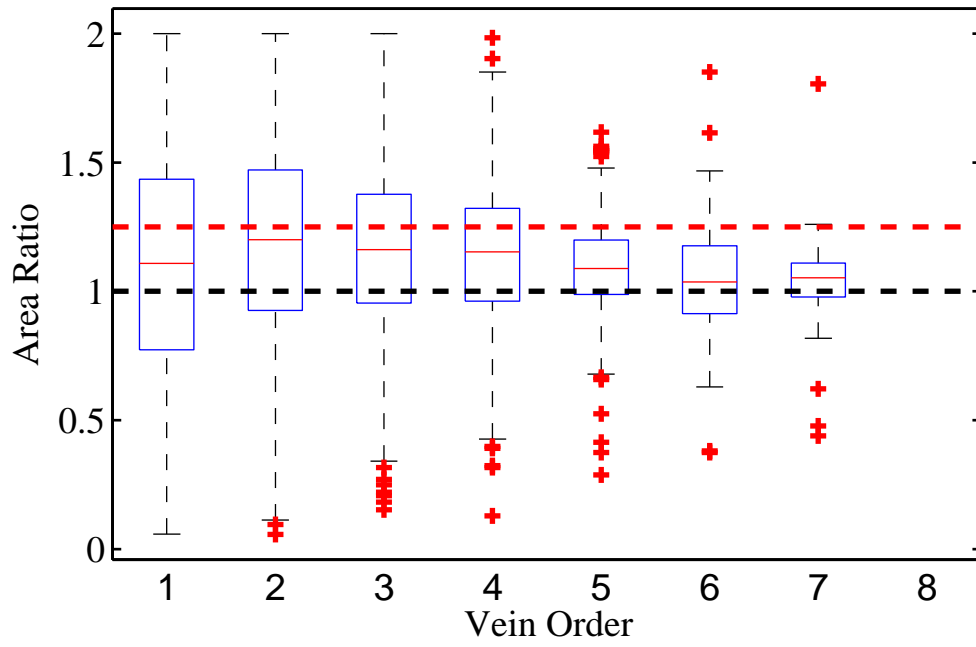

- - - Murrays Law - - - Elastic Similarity

*Acer buergerianum* Miq

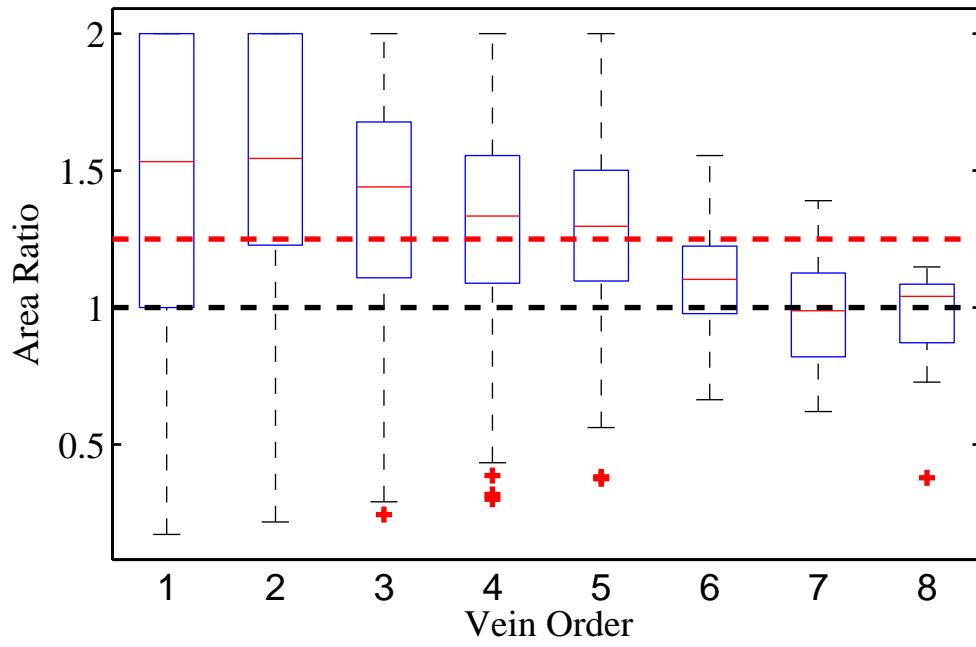

- - - Murrays Law - - - Elastic Similarity

Acer griseum

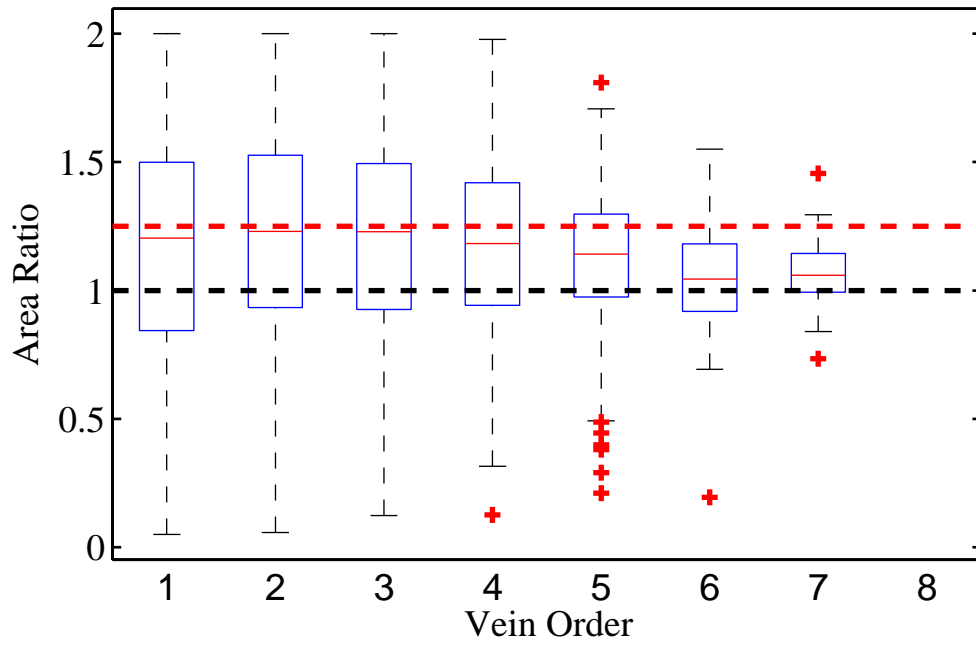

- - - Murrays Law   - - - Elastic Similarity

Combretum mossambicense (Klotzsch) Engl.

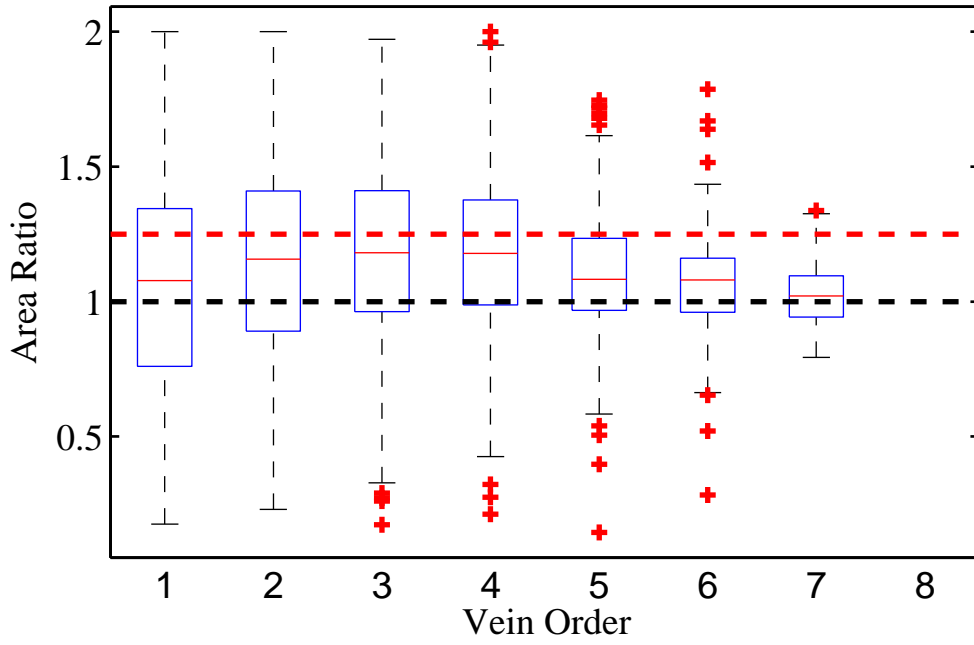

- - - Murrays Law   - - - Elastic Similarity

*Olmediella betschleriana* (Goepp.) Loes

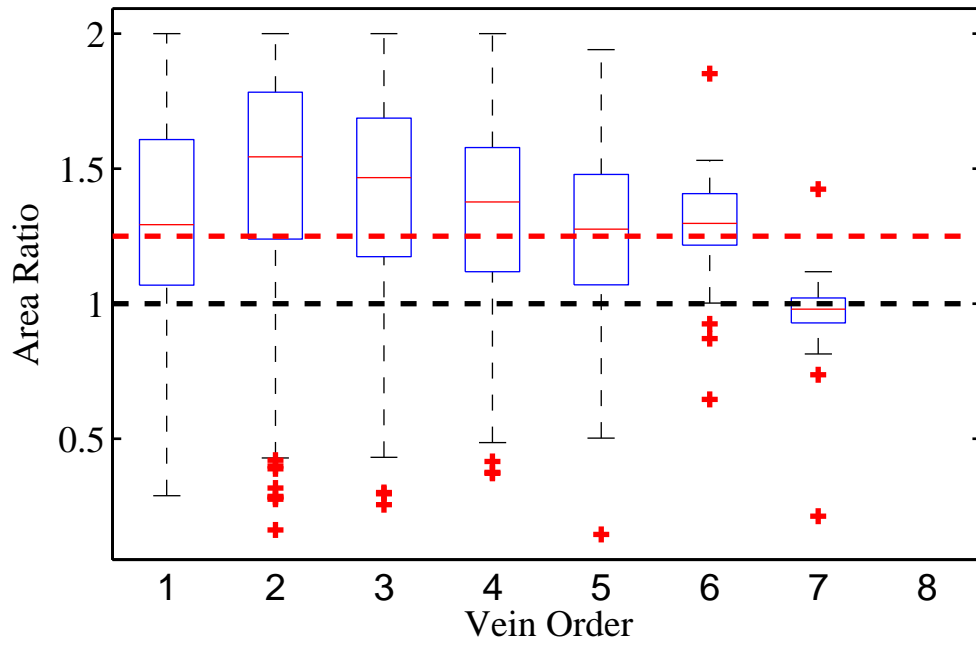

- - - Murrays Law - - - Elastic Similarity

*Triumfetta bartramia* L.

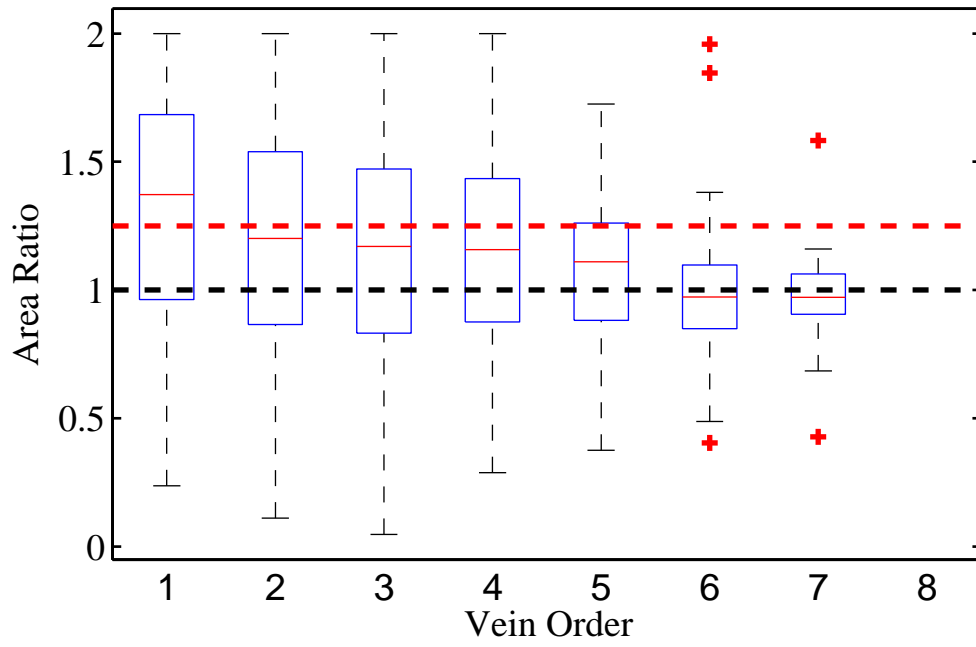



- - - Murrays Law   - - - Elastic Similarity

*Salix humilis* Marsh

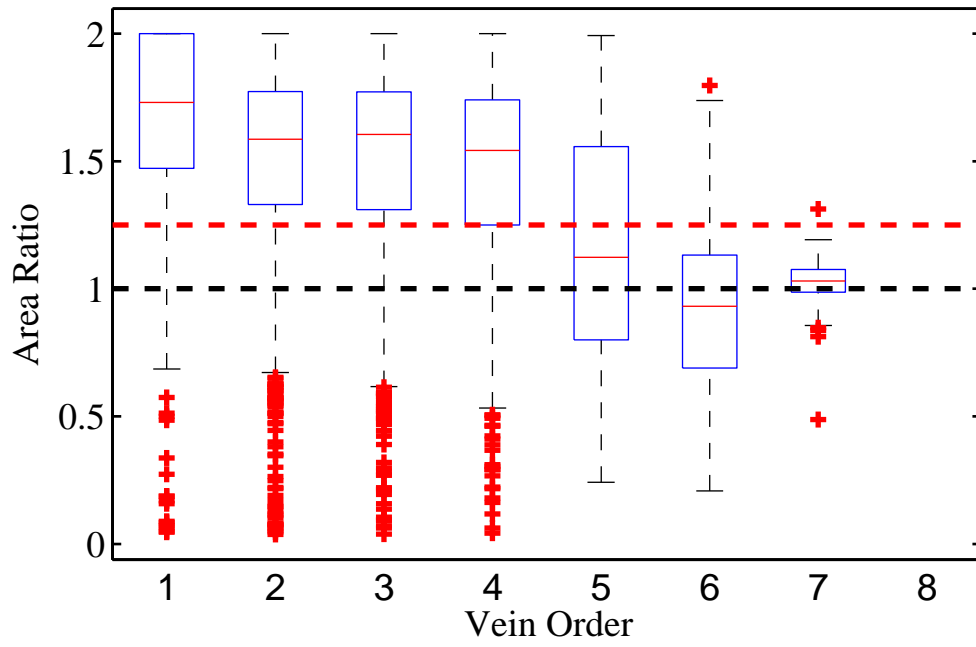

- - - Murrays Law - - - Elastic Similarity

*Quercus gambelii* Nutt.

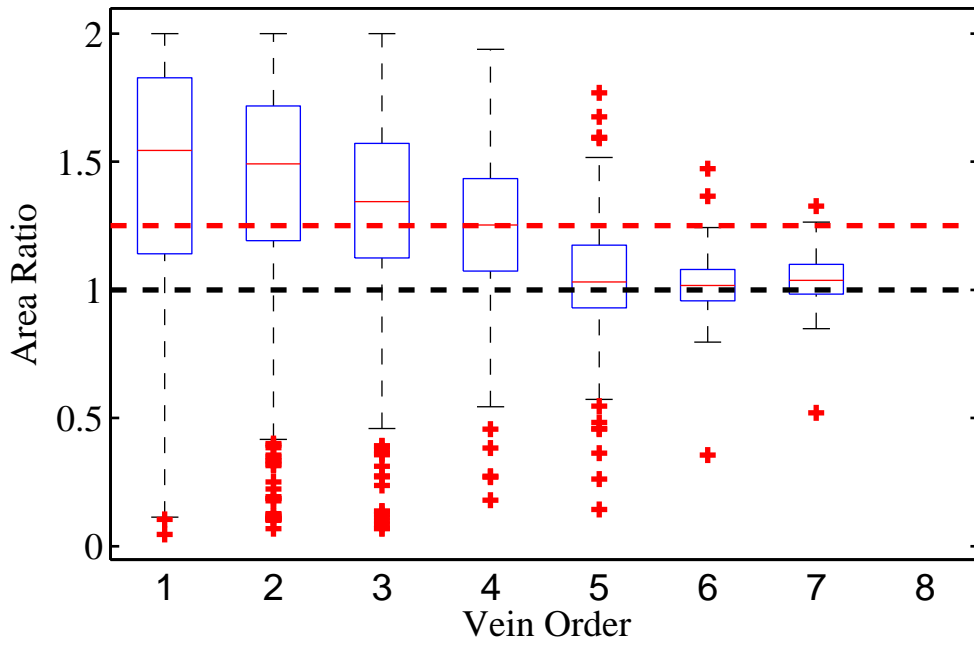

- - - Murrays Law - - - Elastic Similarity

Malpighia urens L.

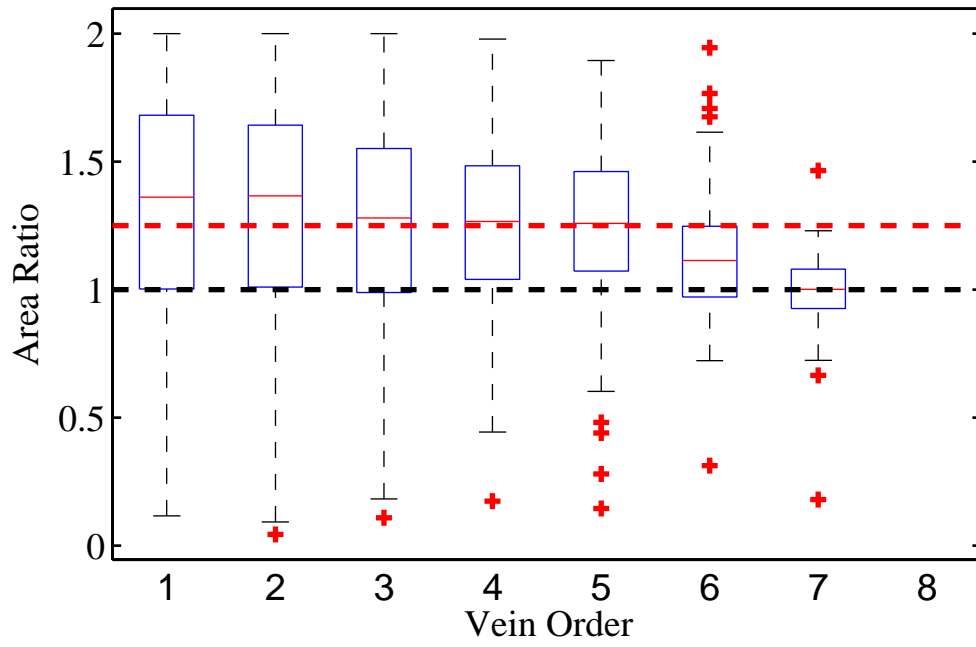

- - - Murrays Law - - - Elastic Similarity

*Sladenia celastrifolia* Kurz.

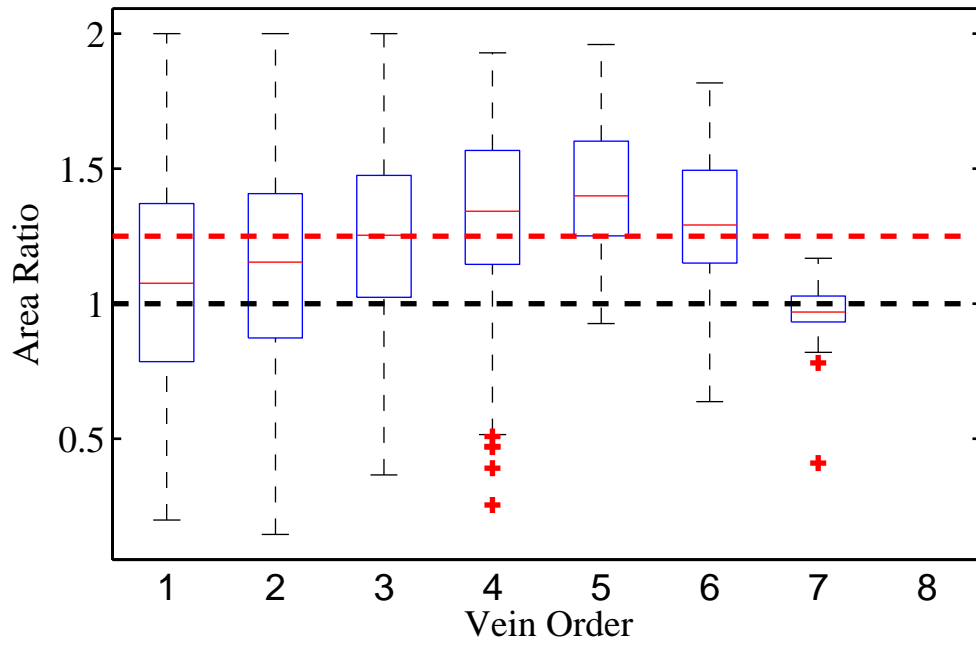

- - - Murrays Law   - - - Elastic Similarity

*Quercus chapmanii* Sarg.

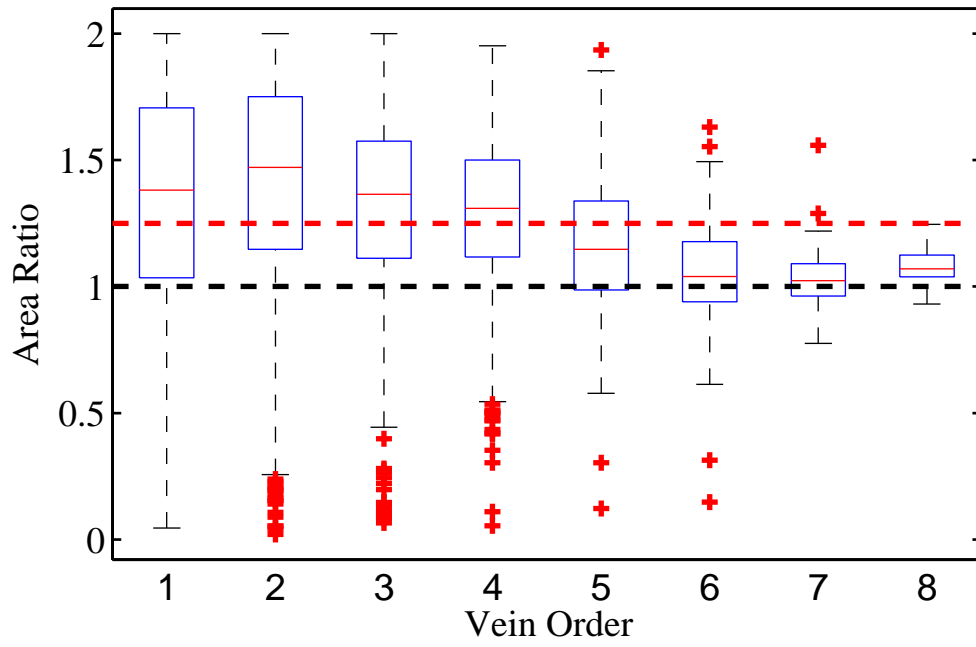

- - - Murrays Law - - - Elastic Similarity

*Sacoglottis amazonica* Mart.

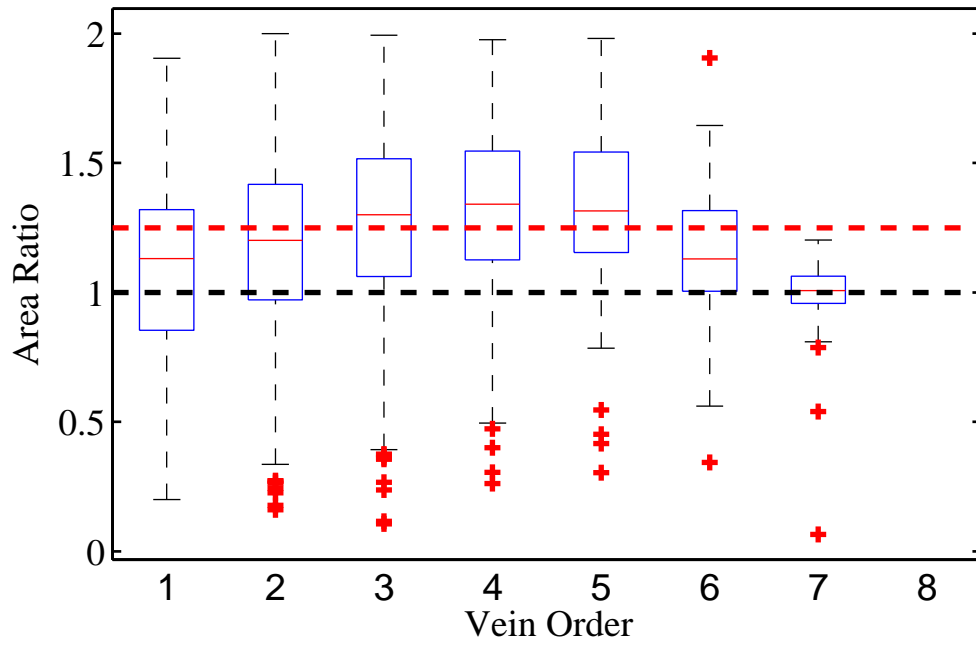

- - - Murrays Law   - - - Elastic Similarity

*Dais cotinifolia* L.

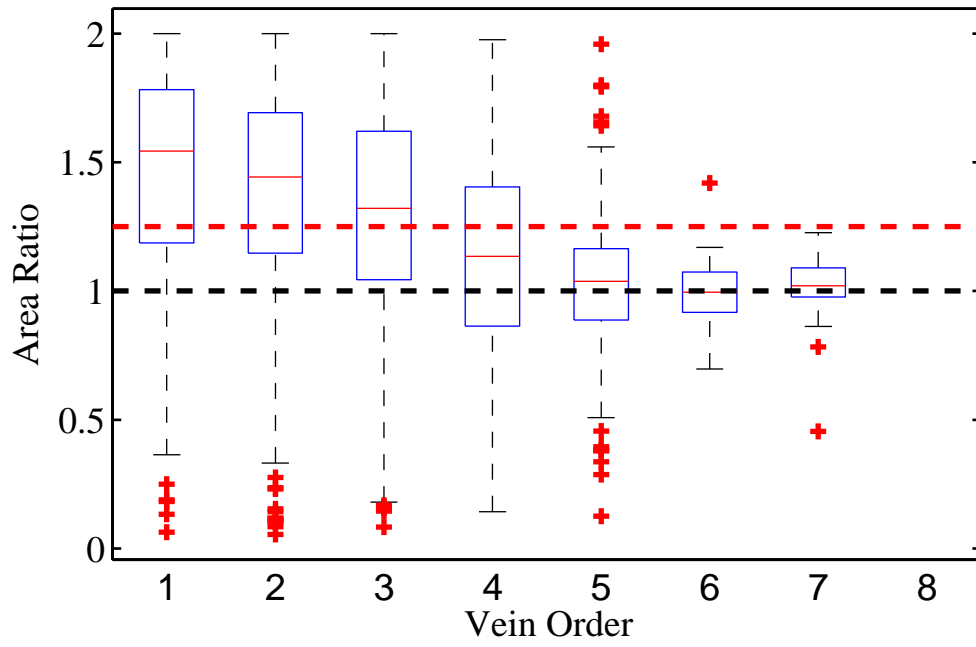

- - - Murrays Law    - - - Elastic Similarity

*Daphnopsis caracasana* Miessn.

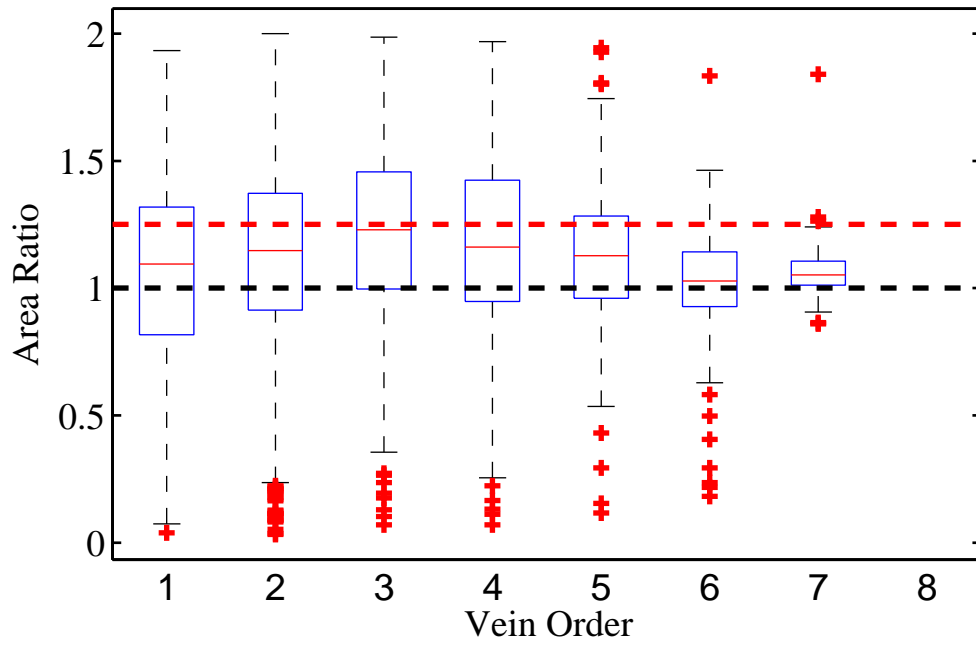



- - - Murrays Law   - - - Elastic Similarity

*Acokanthera oppositifolia* (Lam.) Codd

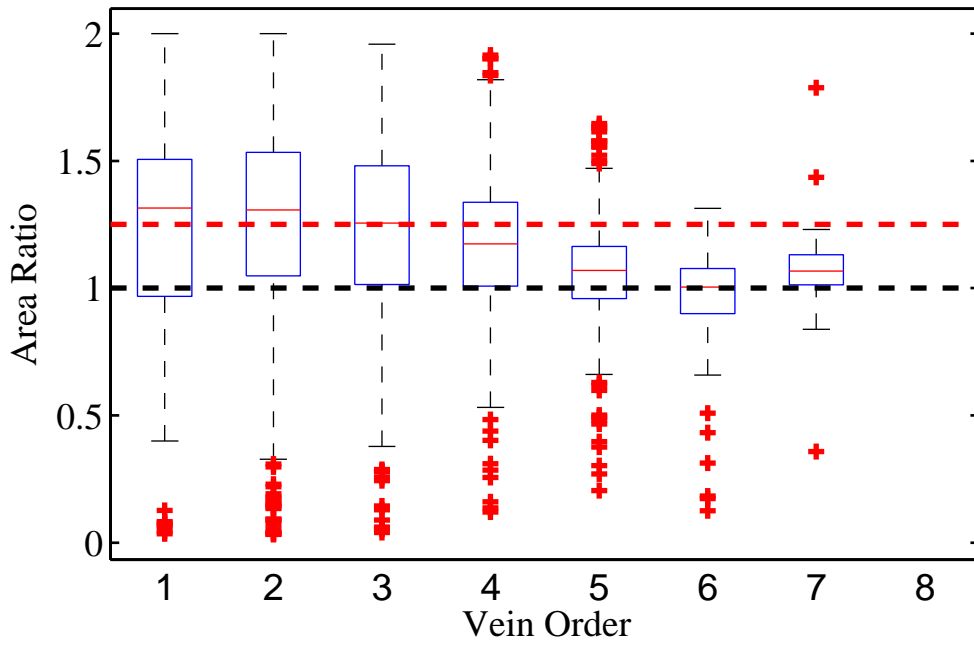

- - - Murrays Law   - - - Elastic Similarity

*Betula papyrifera occidentalis*

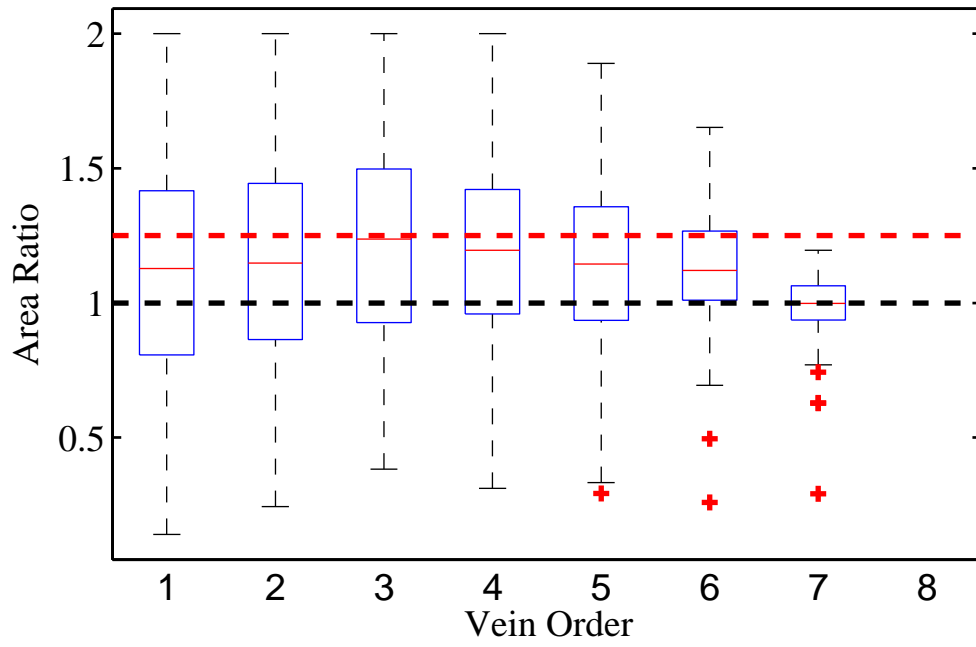

- - - Murrays Law    - - - Elastic Similarity

*Fraxinus floribunda* Wall.

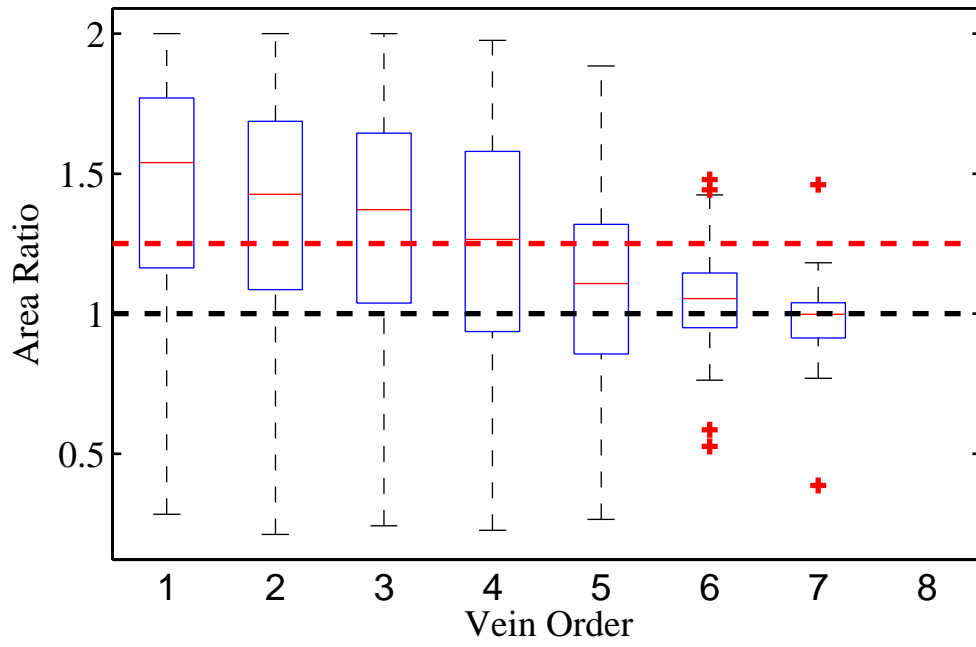

- - - Murrays Law - - - Elastic Similarity

*Annona muricata* L.

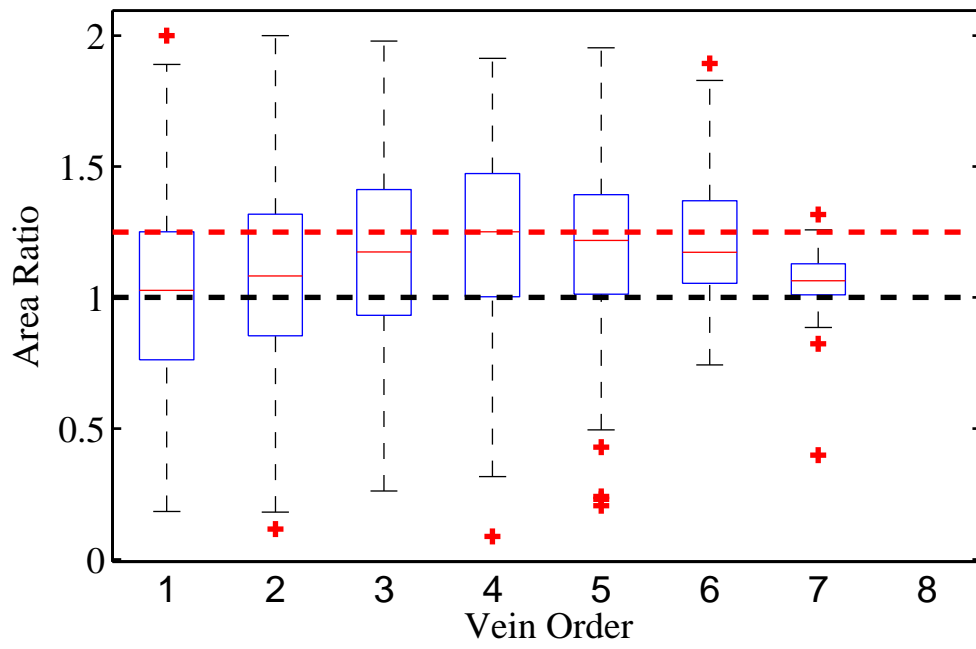

- - - Murrays Law - - - Elastic Similarity

*Davilla philippinensis* Rolfe

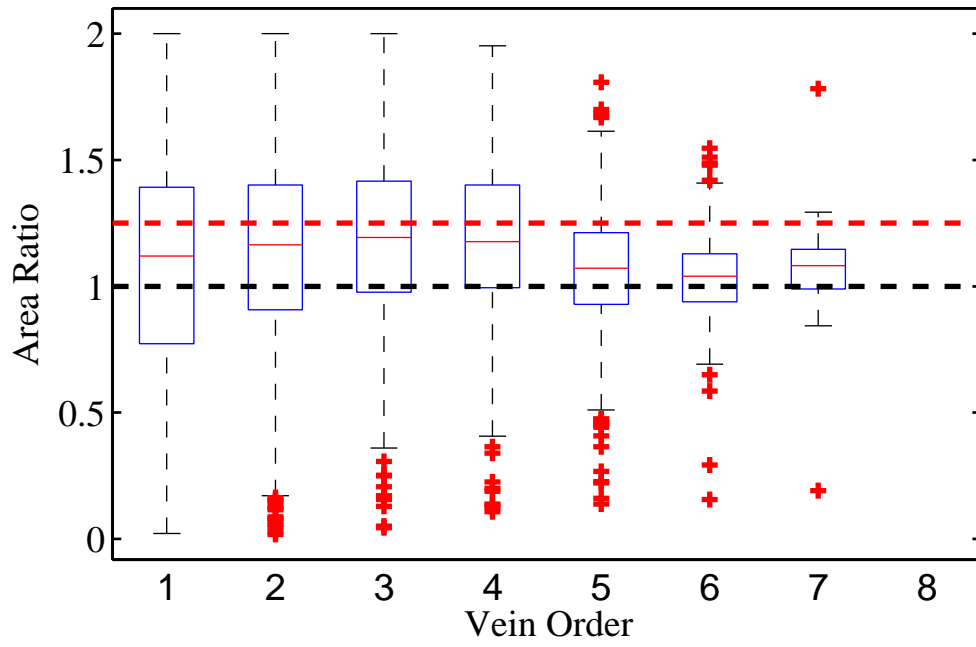

- - - Murrays Law   - - - Elastic Similarity

*Securidaca diversifolia* (S.) Blake

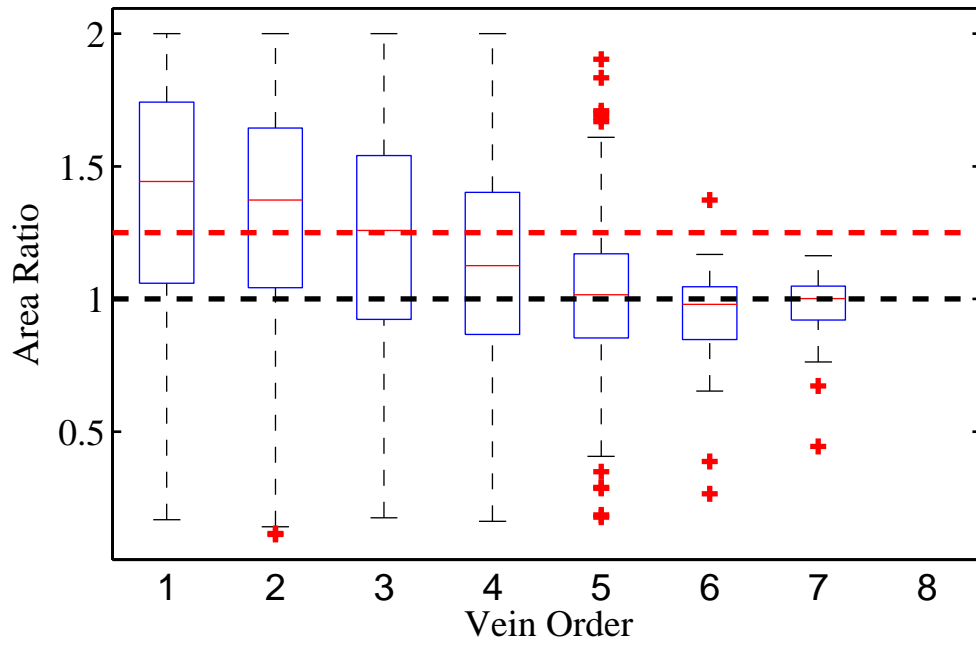

- - - Murrays Law - - - Elastic Similarity

*Sloanea guianensis* Bth.

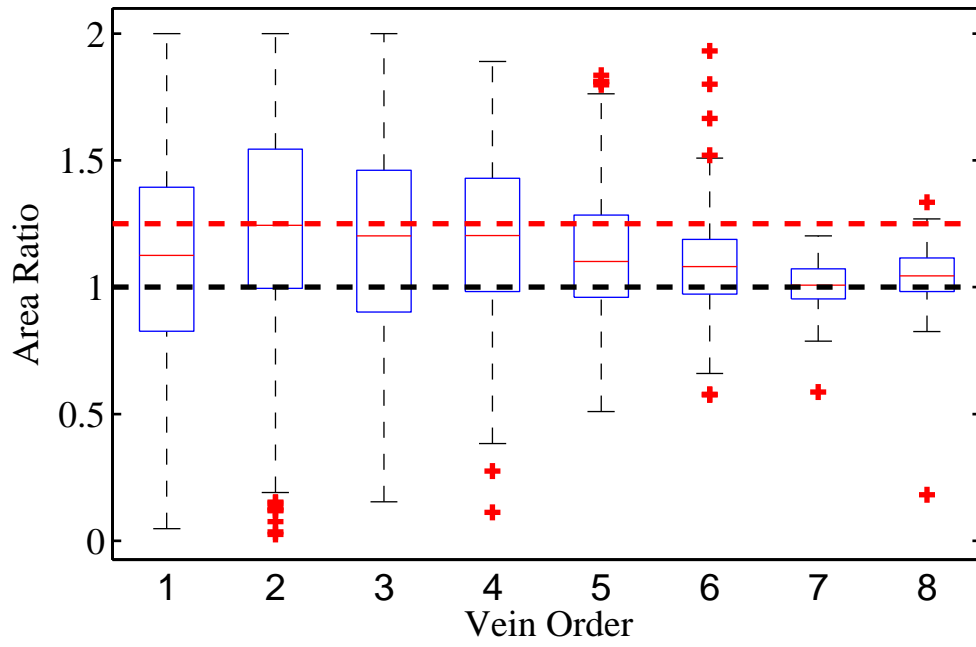

- - - Murrays Law   - - - Elastic Similarity

*Parvatia brunoniana* Dcne.

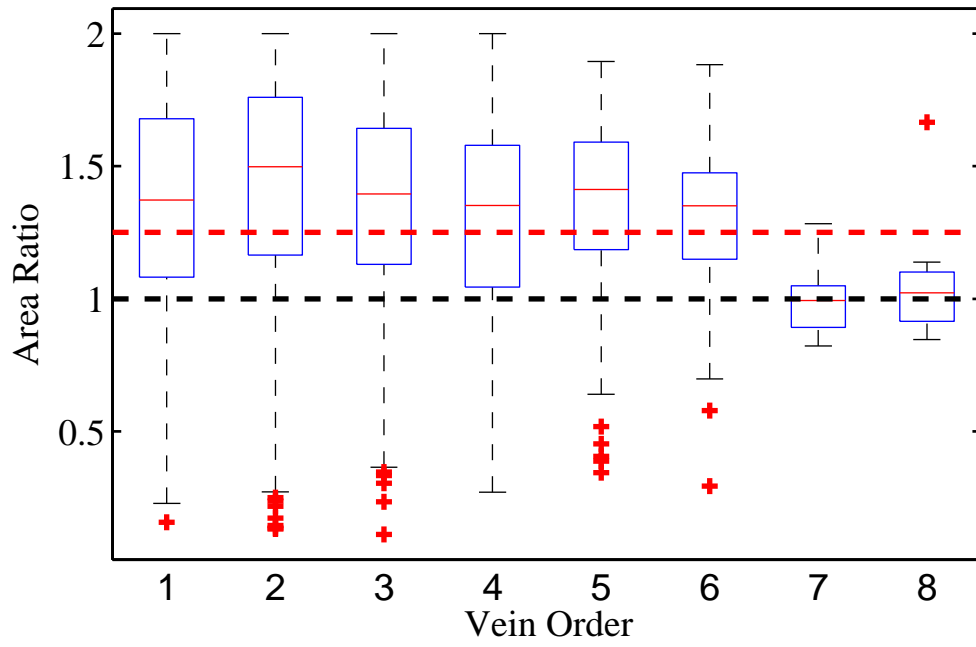



- - - Murrays Law   - - - Elastic Similarity

*Celtis monoica*

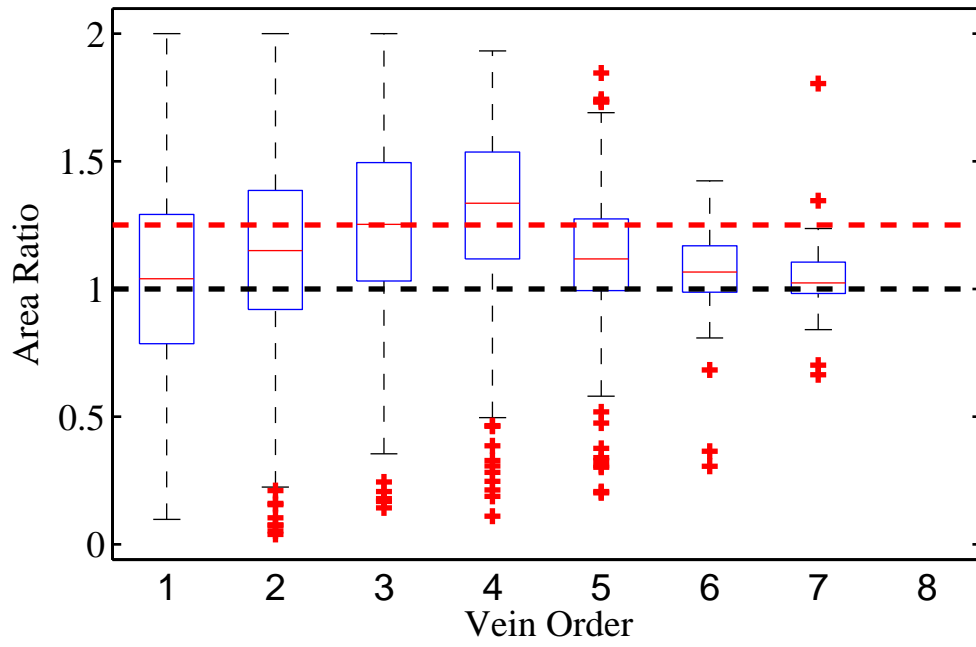

- - - Murrays Law - - - Elastic Similarity

*Girroniera parvifolia* Pl.

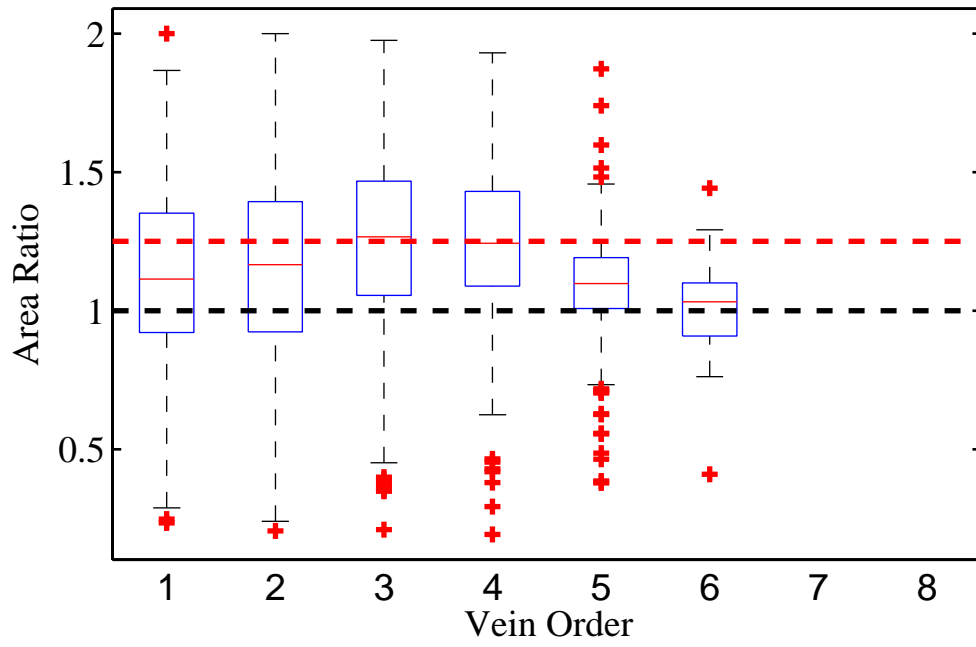

- - - Murrays Law - - - Elastic Similarity

*Tetrameles nudiflora*

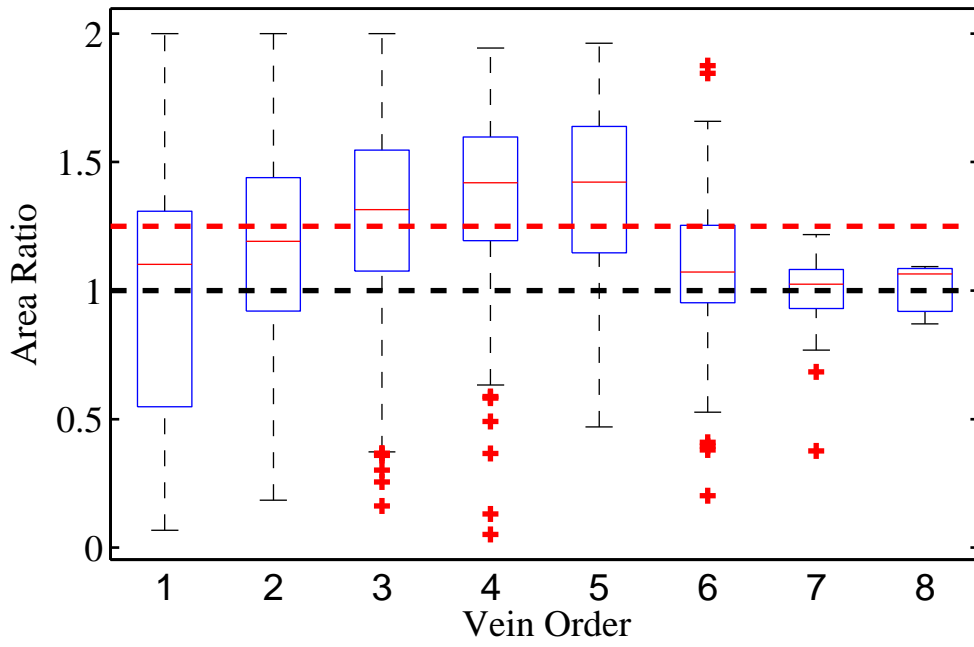

- - - Murrays Law - - - Elastic Similarity

*Polyalthia beccarii* King

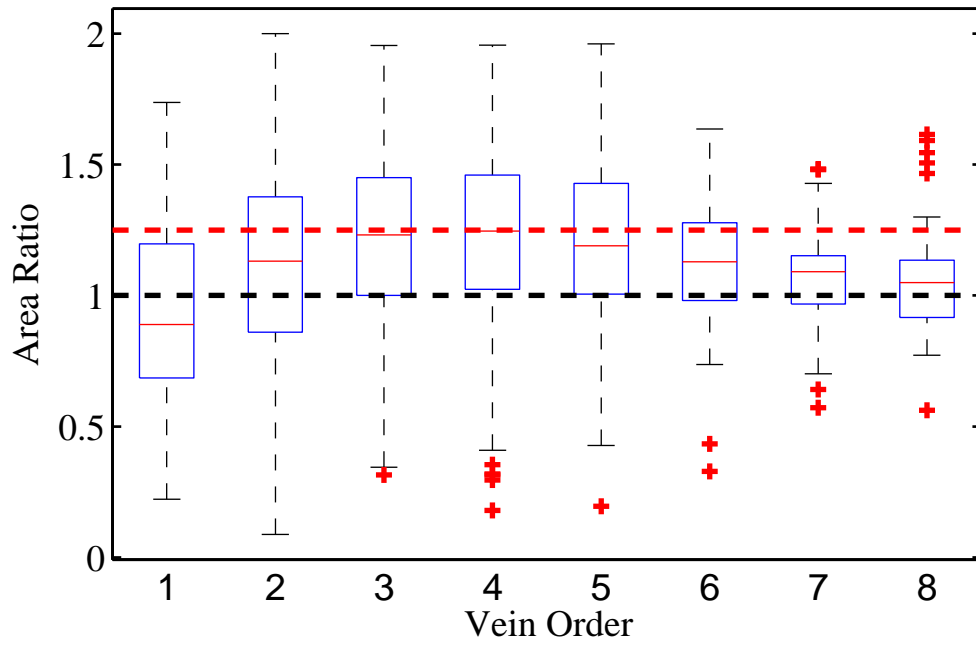

- - - Murrays Law   - - - Elastic Similarity

*Betula platyphylla* Sukatchev. var. *japonica* Hara

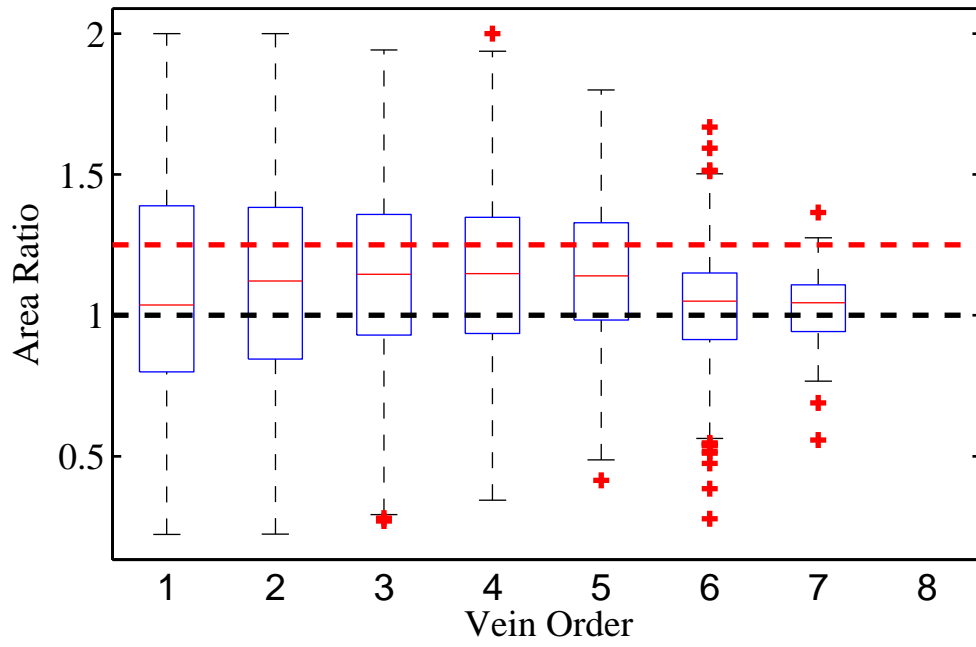

- - - Murrays Law   - - - Elastic Similarity

*Nothopegia colebrookiana* Bl.

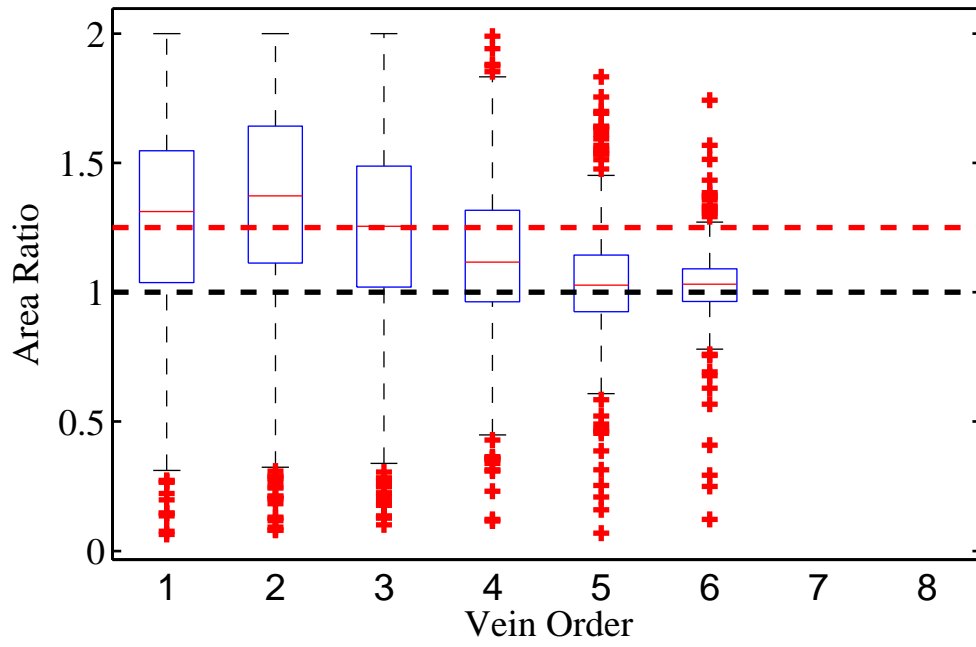

- - - Murrays Law   - - - Elastic Similarity

*Vismia brasiliensis* Choisy

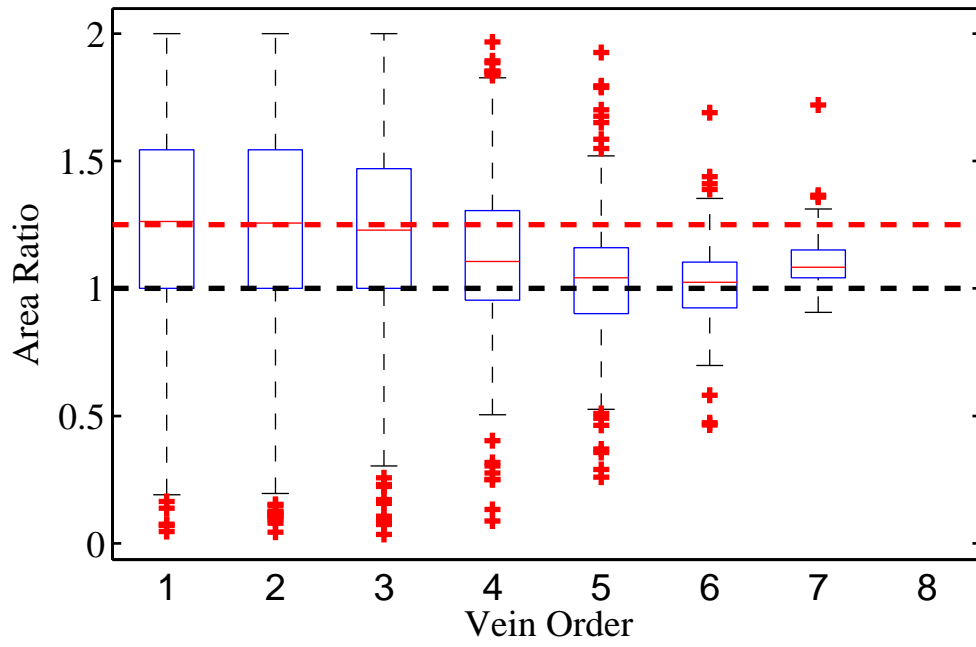

- - - Murrays Law   - - - Elastic Similarity

*Ocotea foetans* (Ait.) Benth.

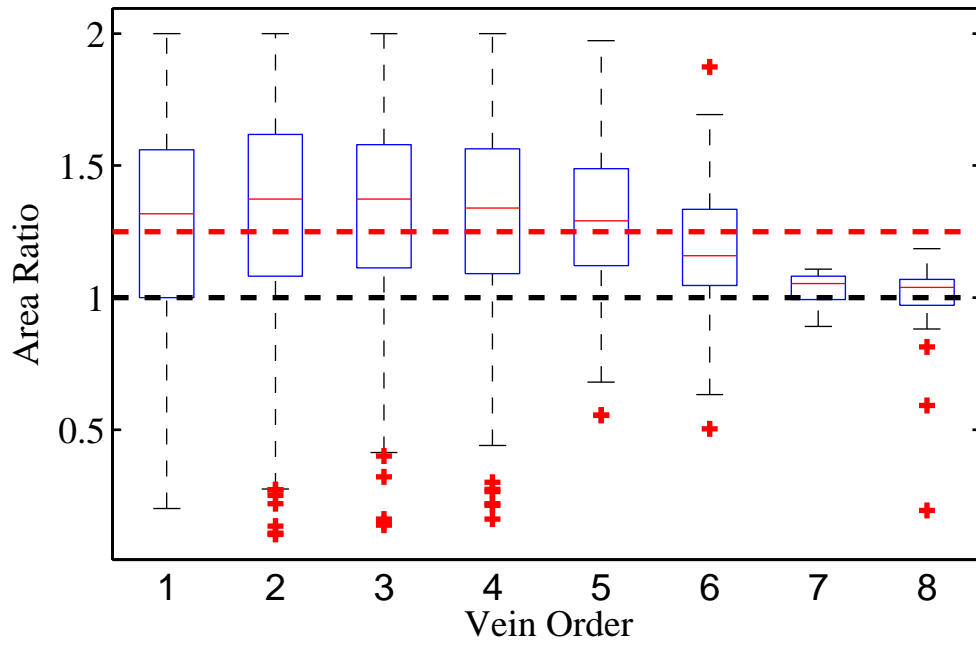



- - - Murrays Law   - - - Elastic Similarity

*Tapura guianensis* Aubl.

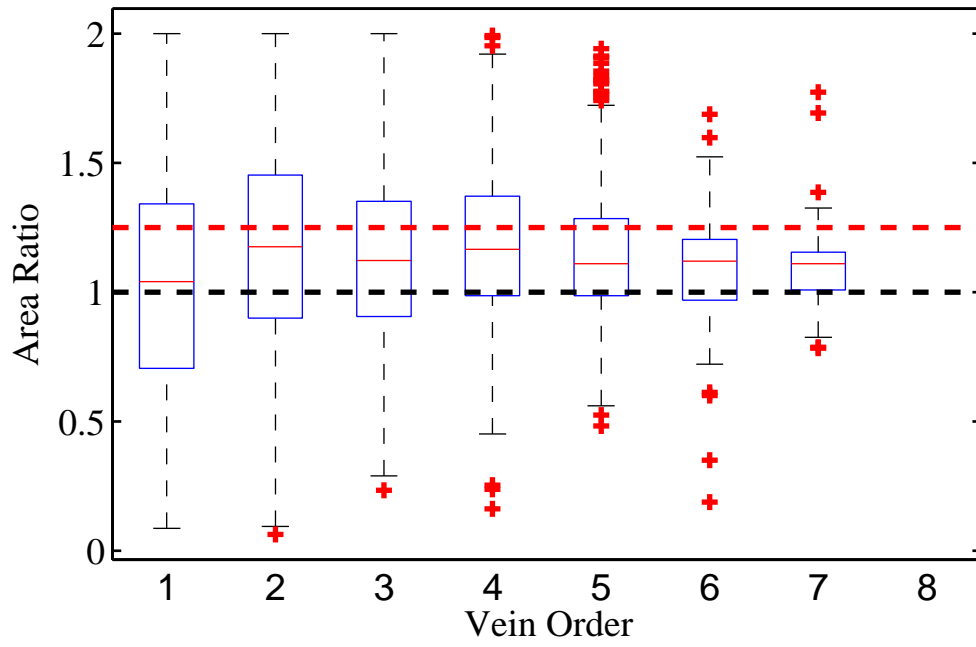

- - - Murrays Law   - - - Elastic Similarity

Couratari multiflora (Sm.) Eyma

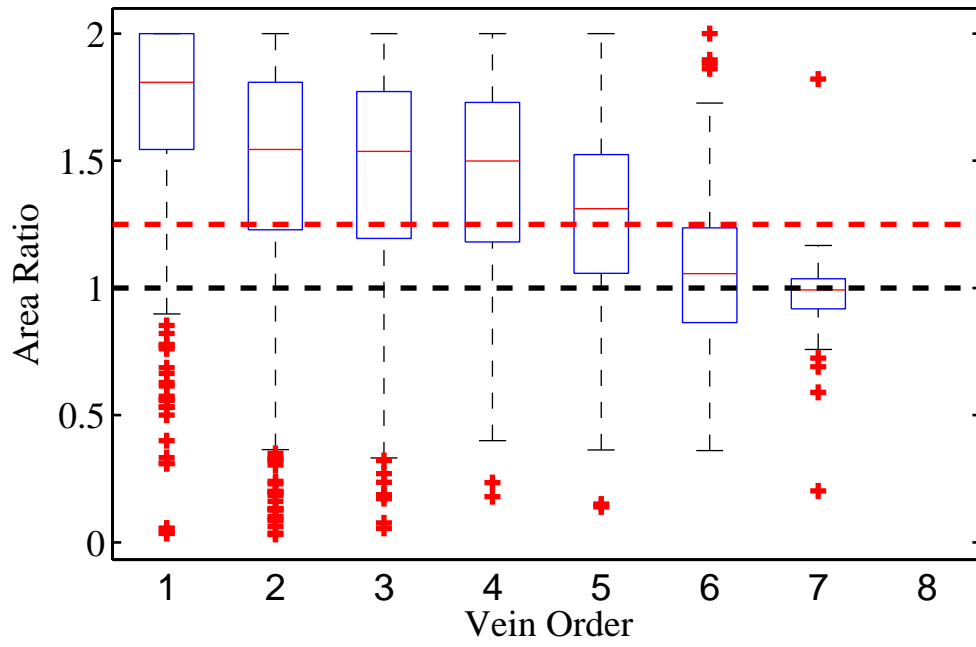

- - - Murrays Law - - - Elastic Similarity

*Tetracera arborescens* Jack (Det. As *T. scandens* Merr)

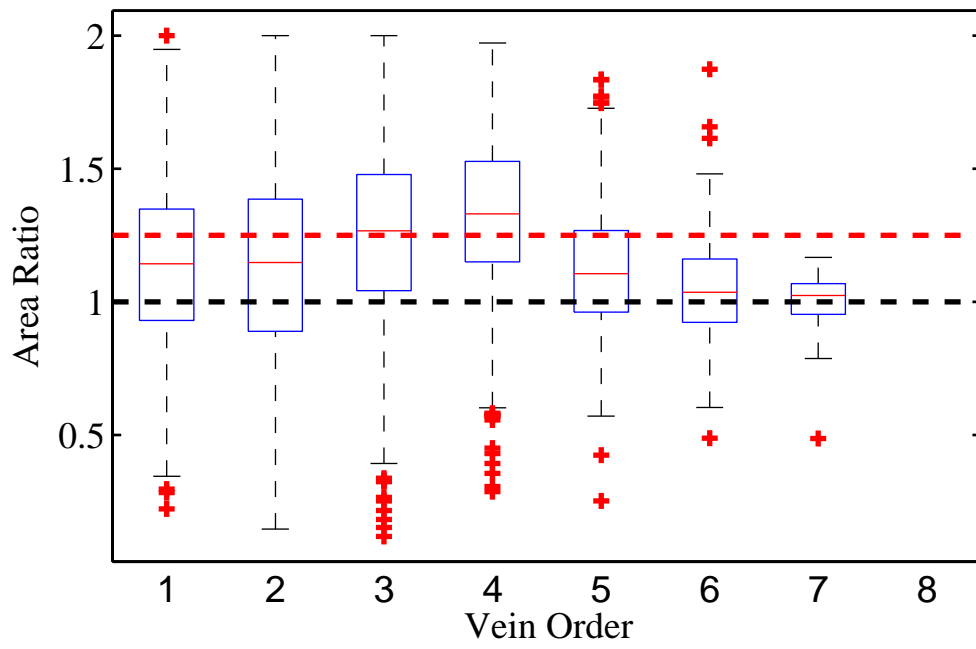

- - - Murrays Law - - - Elastic Similarity

*Quercus breviloba* Sarg.

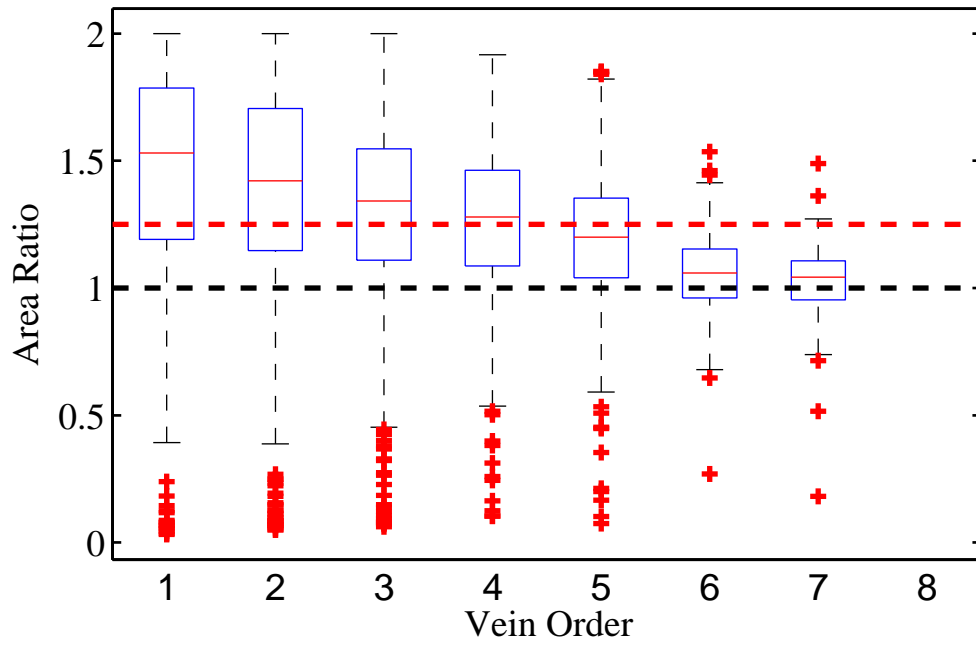

- - - Murrays Law - - - Elastic Similarity

*Aralia spinosa*

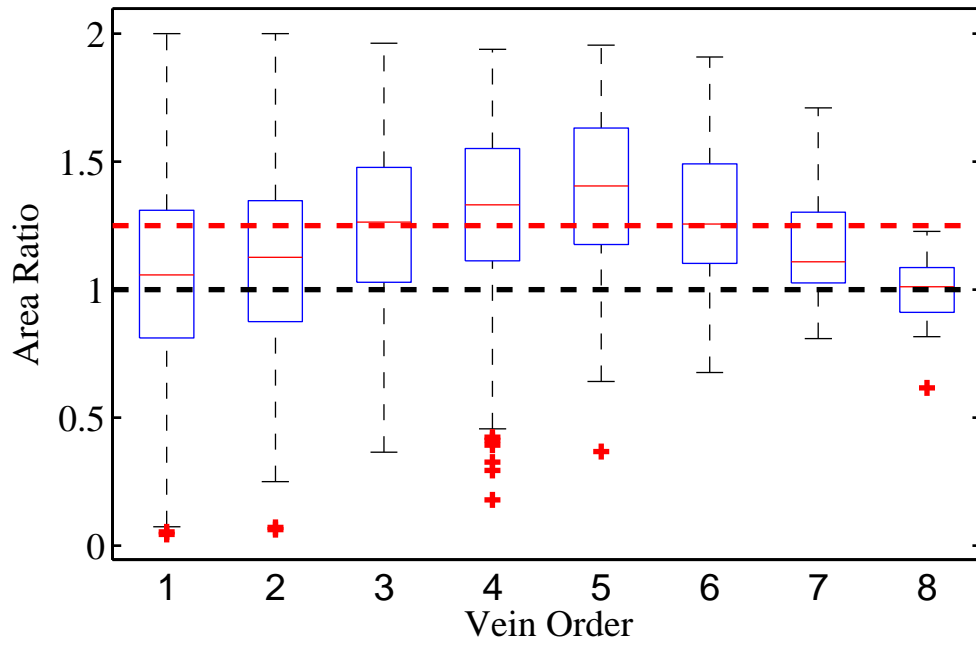

- - - Murrays Law    - - - Elastic Similarity

*Acokanthera longiflora* Stapf.

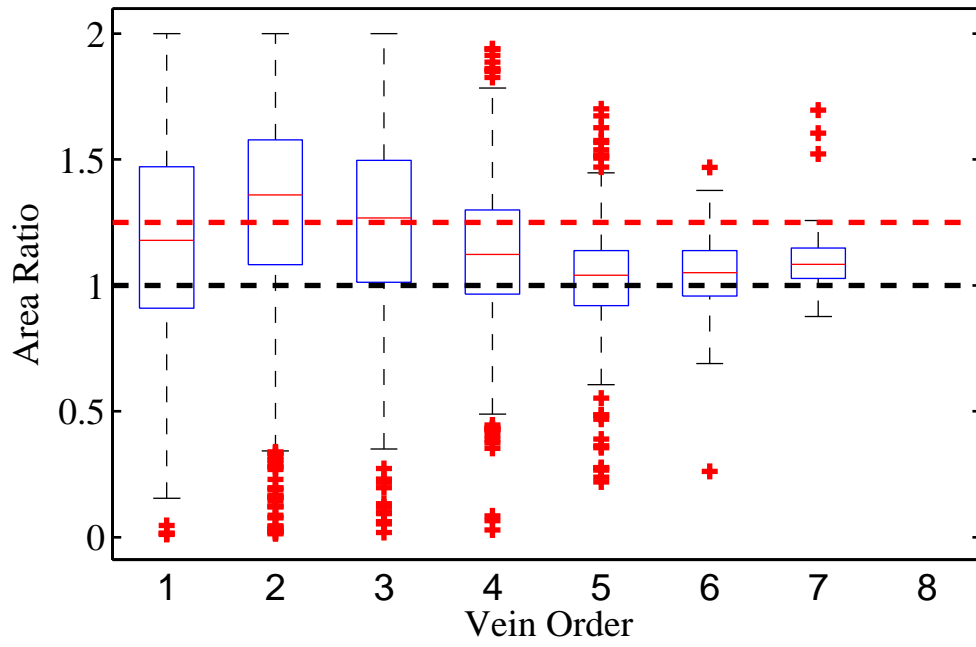

- - - Murrays Law    - - - Elastic Similarity

Arctostaphylos hooveri Wells

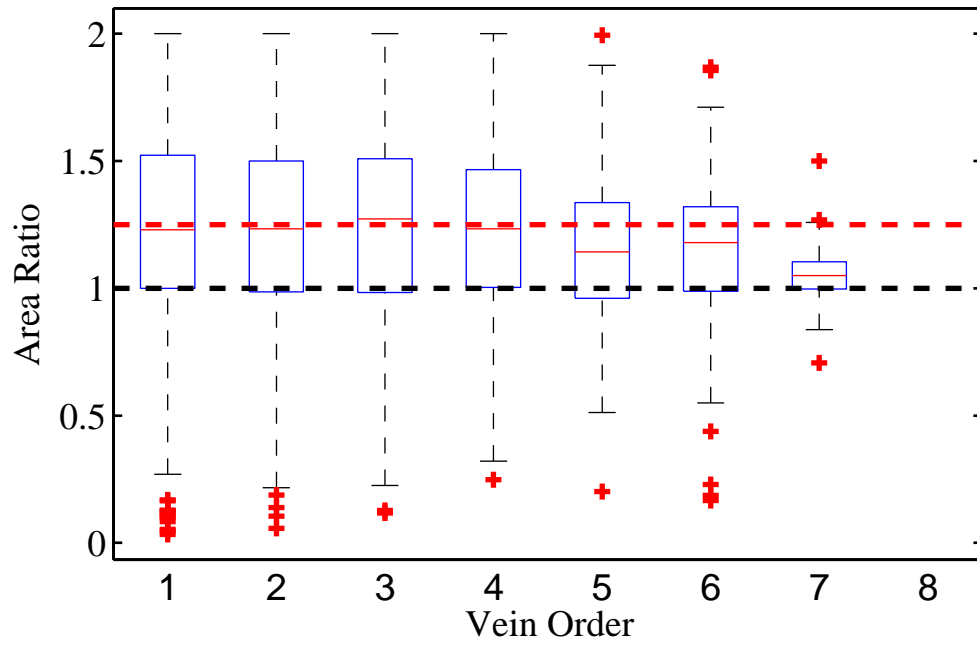

- - - Murrays Law - - - Elastic Similarity

*Atroxima liberica* Stapf

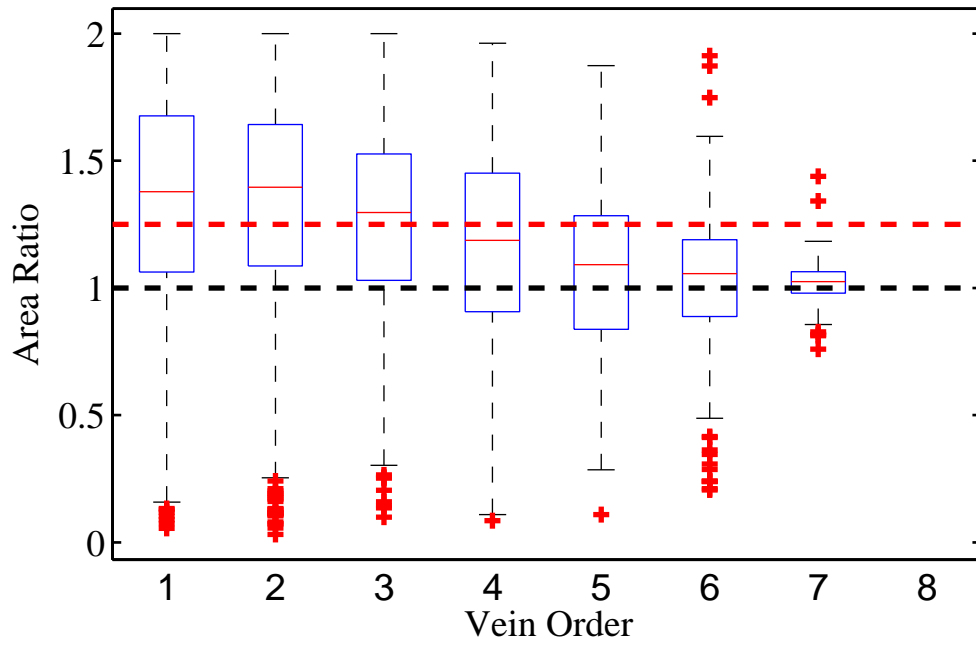



- - - Murrays Law   - - - Elastic Similarity

*Girroniera cuspidata* (Bl.) Kurz

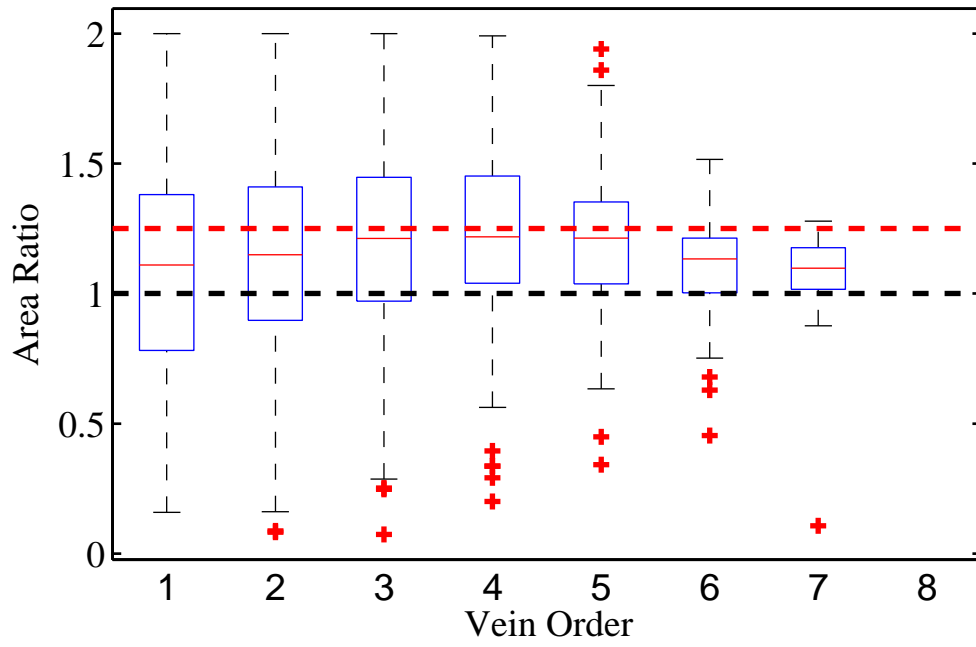

- - - Murrays Law - - - Elastic Similarity

*Quercus arizonica* Sarg.

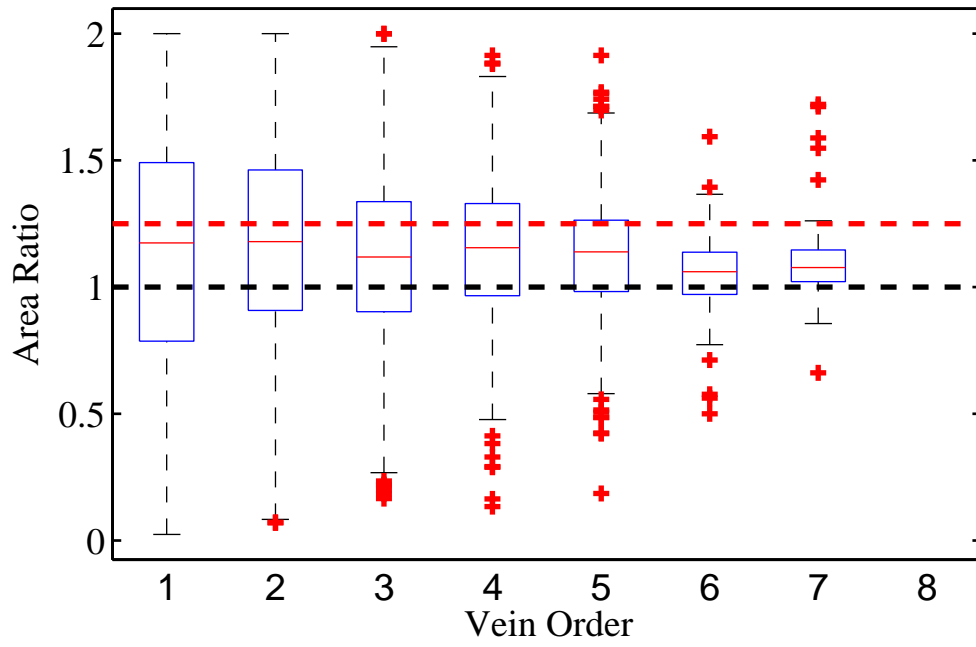

- - - Murrays Law   - - - Elastic Similarity

*Haplolobus acuminatus* H.J.Lam

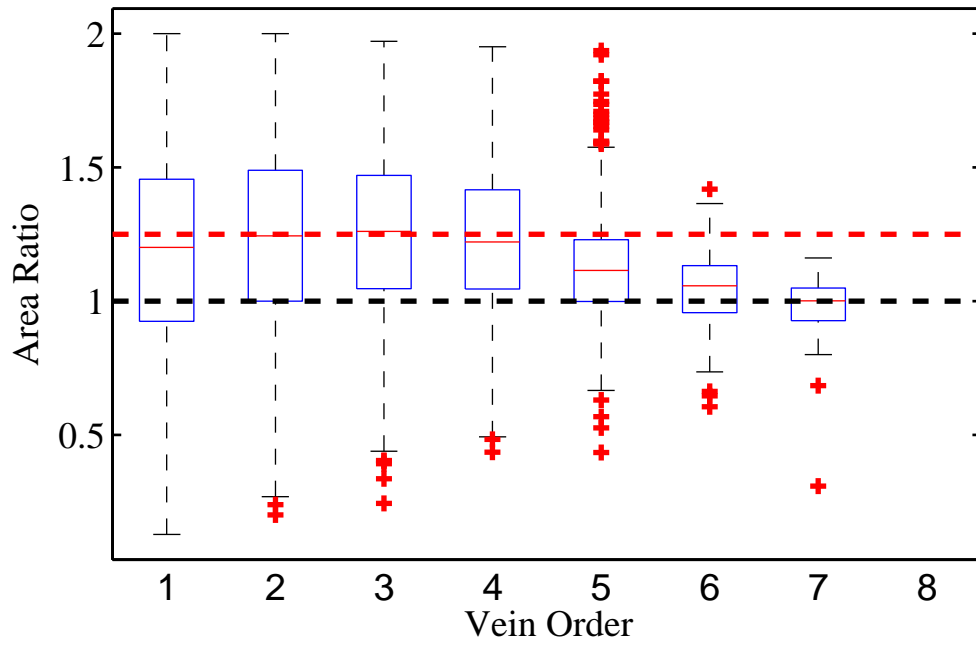

- - - Murrays Law - - - Elastic Similarity

*Parishia rosea*

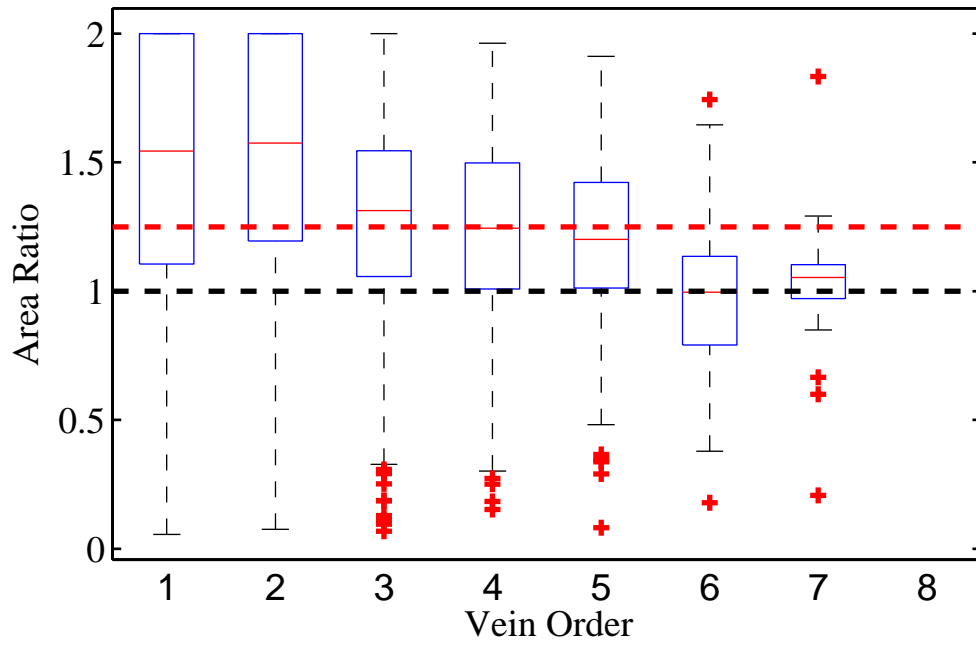

- - - Murrays Law    - - - Elastic Similarity

*Ostrearia australiana* C.T. White

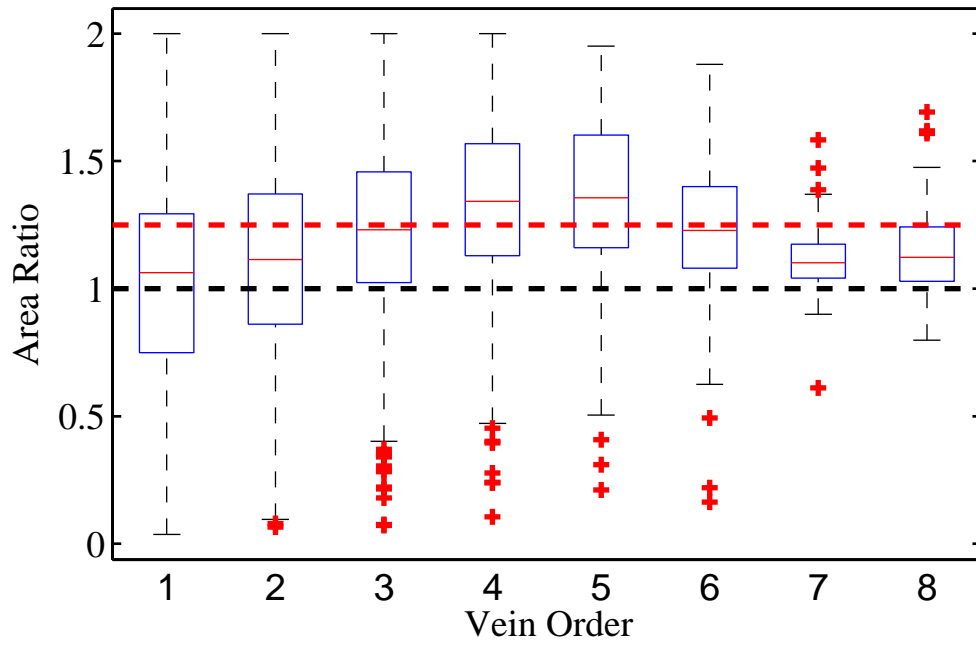

- - - Murrays Law - - - Elastic Similarity

*Gironniera nervosa* Pl.

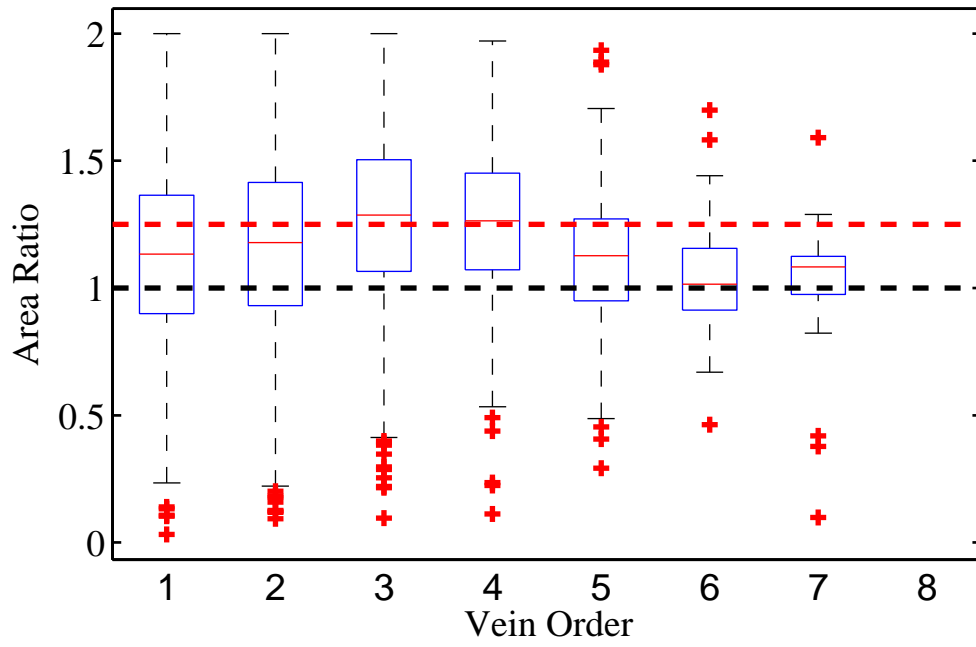

- - - Murrays Law - - - Elastic Similarity

*Smeathmannia laevigata* Soland

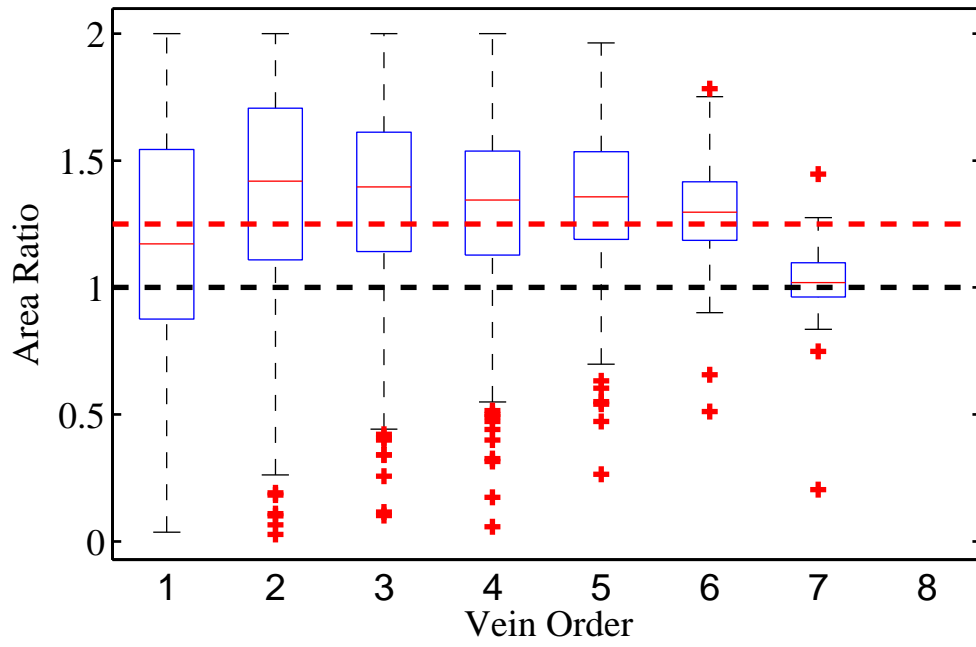

- - - Murrays Law - - - Elastic Similarity

*Citharexylum scabrum* Sesse & Moc.

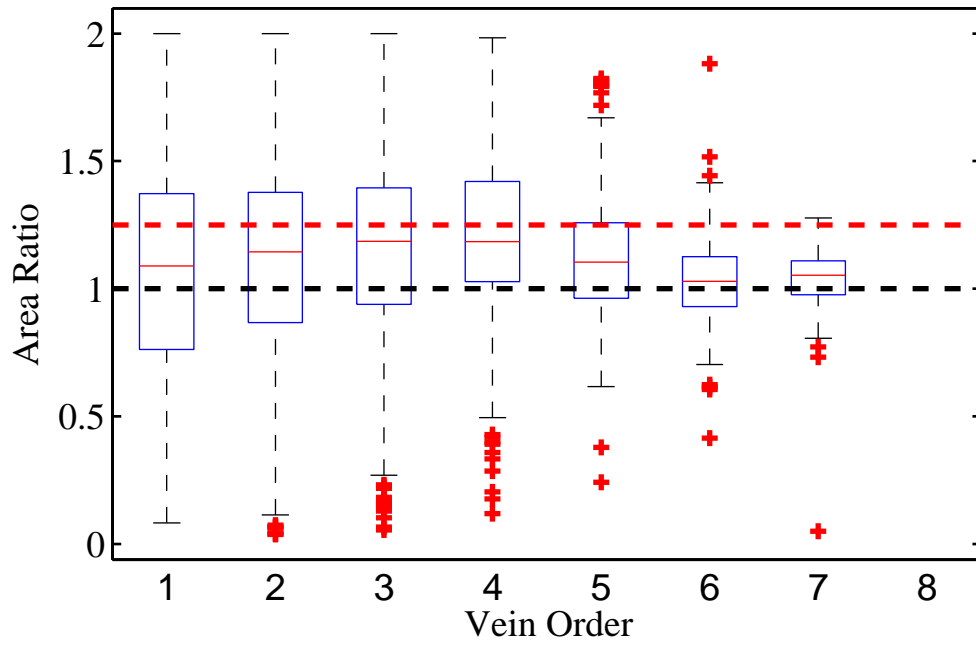



- - - Murrays Law - - - Elastic Similarity

Canarium tomentosum Bl.

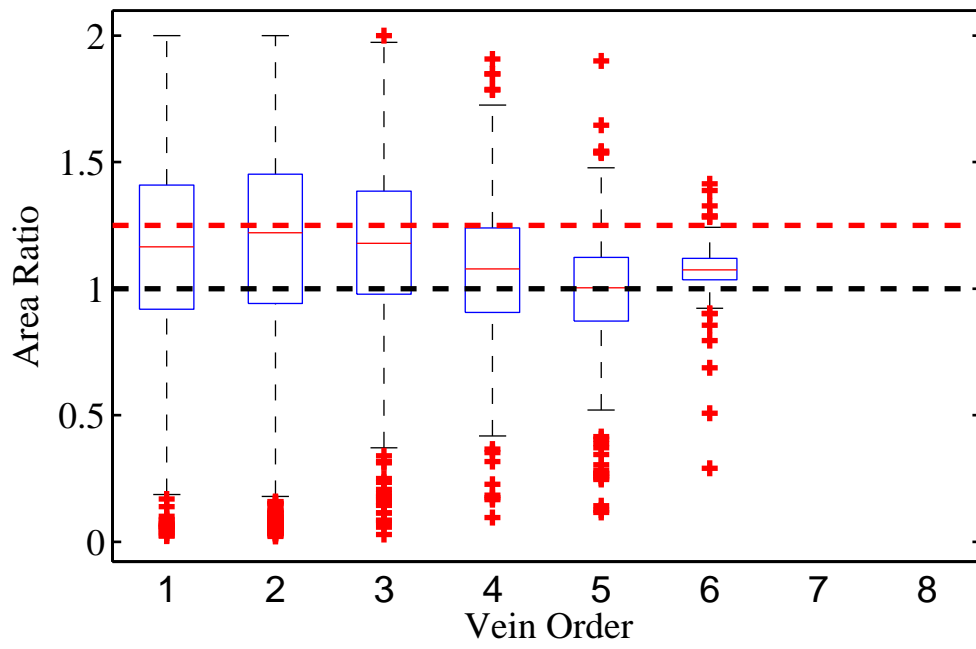

- - - Murrays Law - - - Elastic Similarity

*Dacryodes rostrata* Lam.

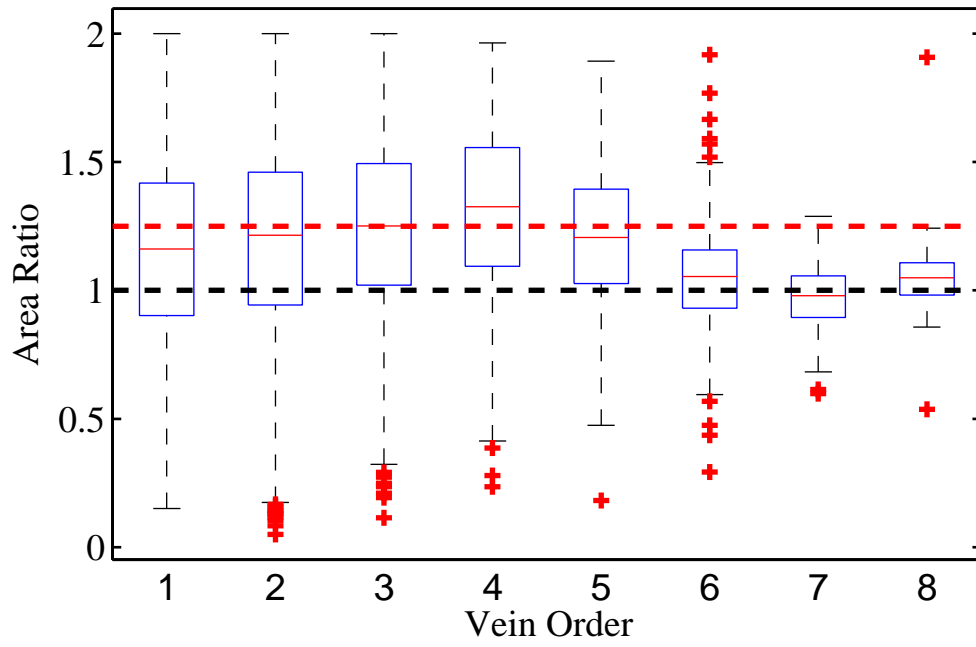

- - - Murrays Law - - - Elastic Similarity

*Aspidosperma megalocarpon* Muell. Arg.

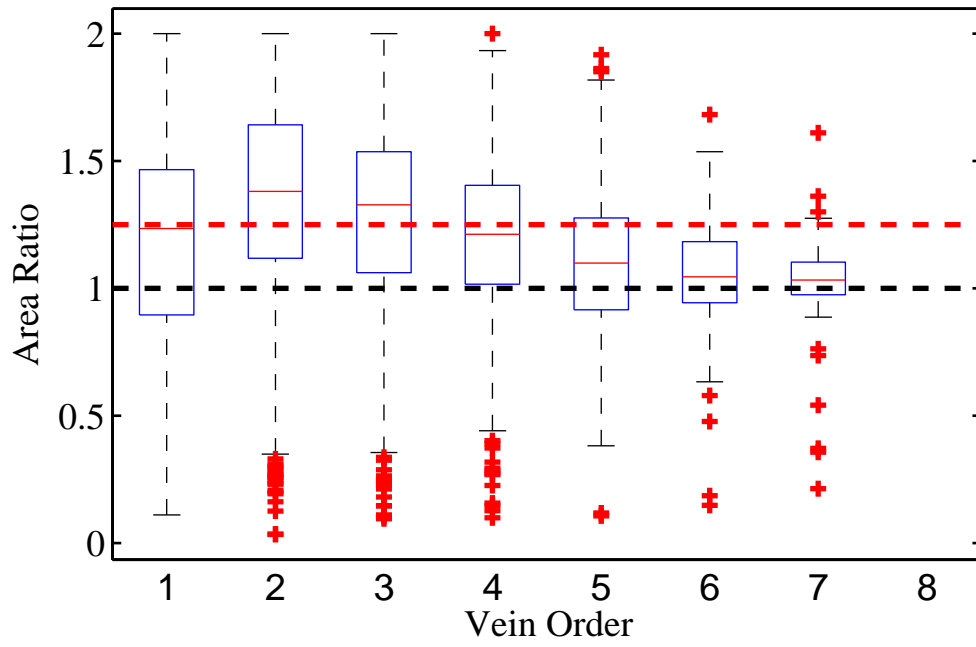

- - - Murrays Law - - - Elastic Similarity

*Zelkova carpinifolia*

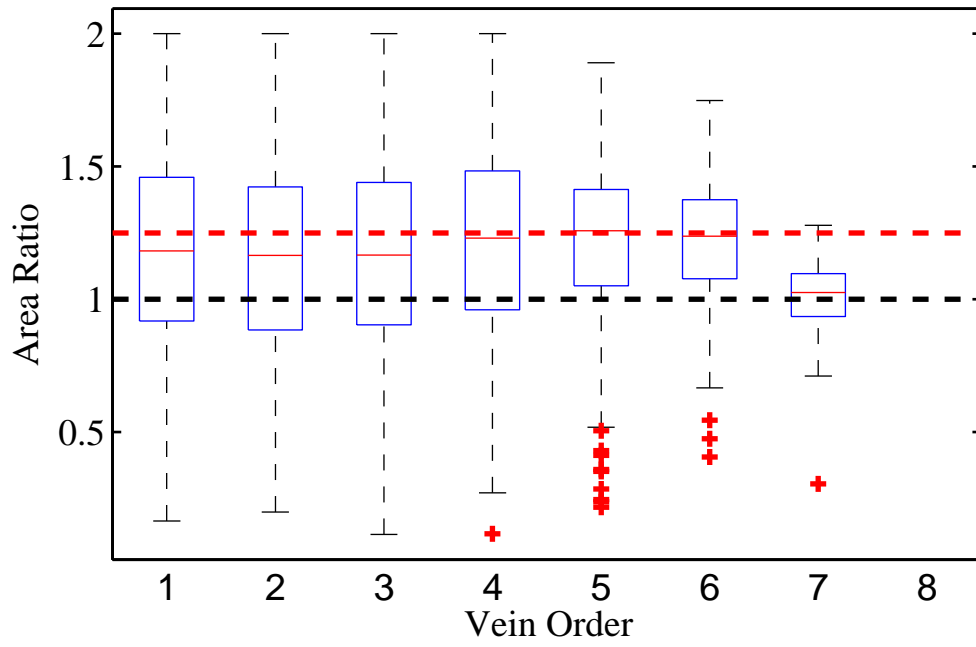

- - - Murrays Law - - - Elastic Similarity

*Irvingia barteri*

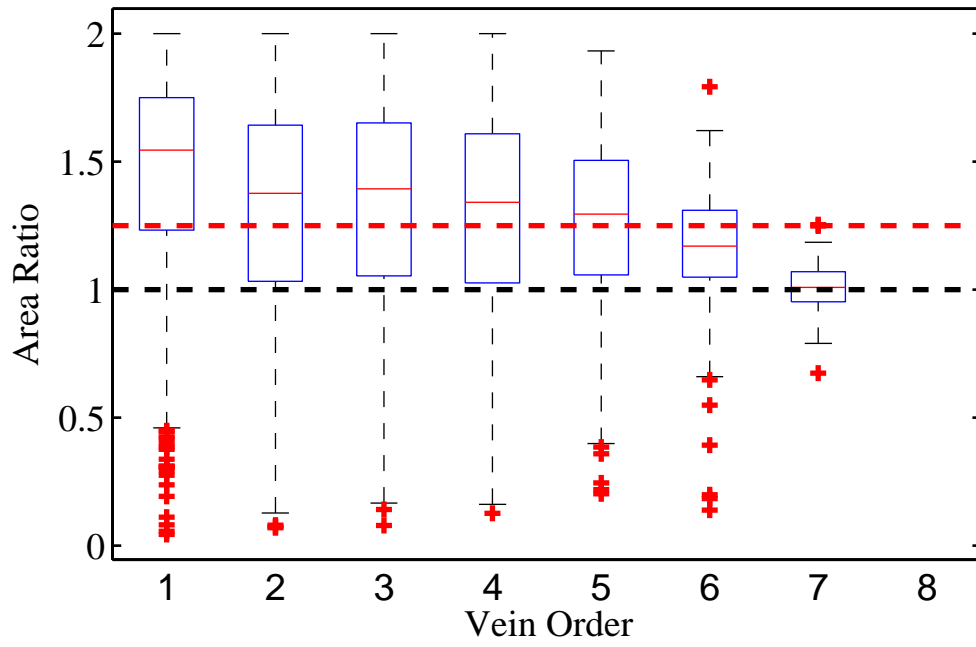

- - - Murrays Law - - - Elastic Similarity

*Microdesmis casearifolia*

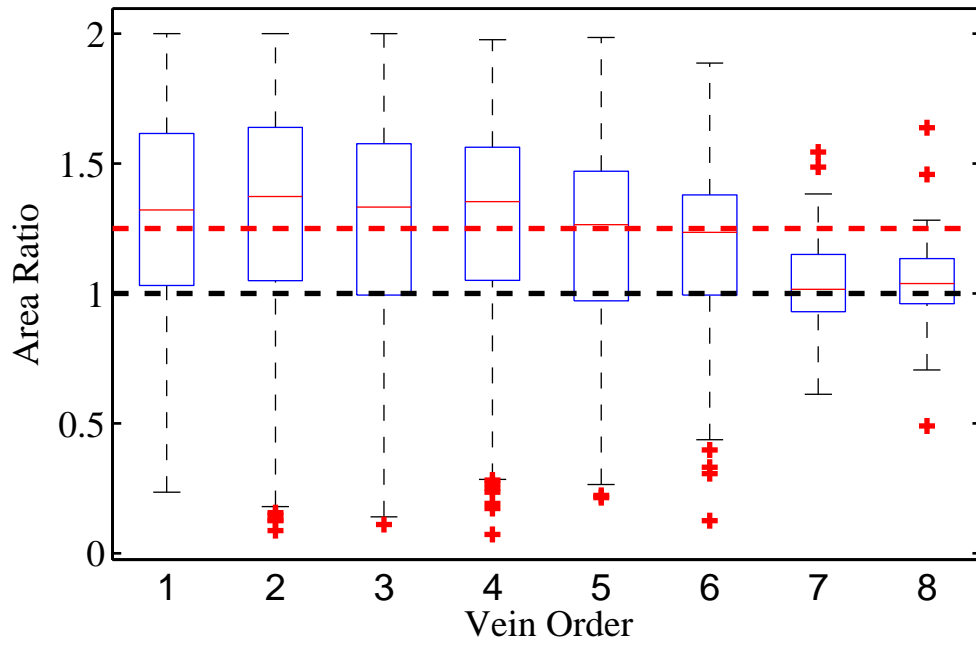

- - - Murrays Law   - - - Elastic Similarity

Anisopus batesii S. Moore

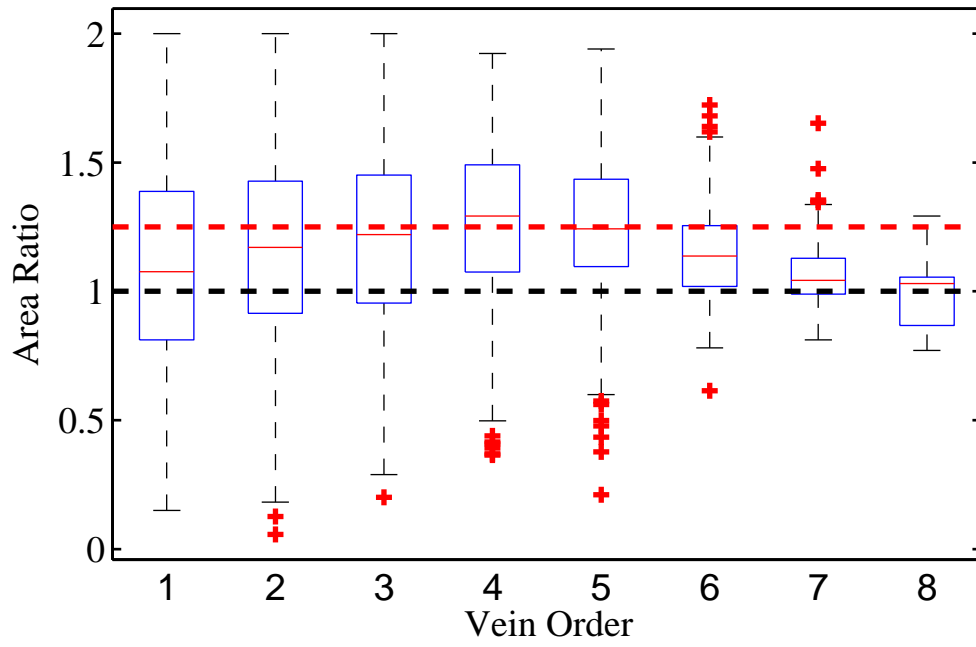

- - - Murrays Law - - - Elastic Similarity

*Castanea floridana* (Sarg.) Ashe

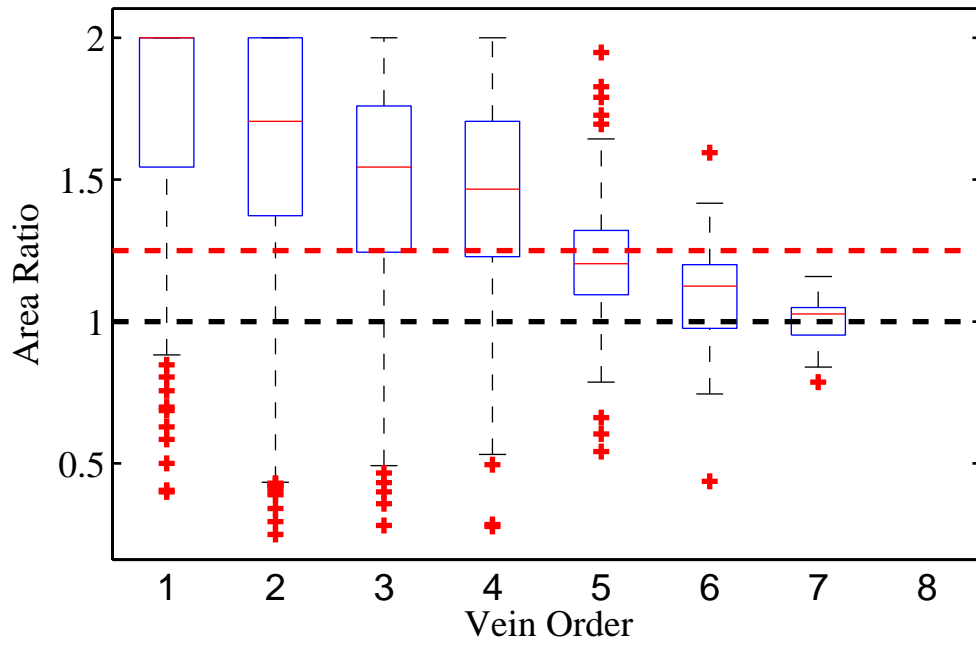



- - - Murrays Law - - - Elastic Similarity

*Quercus hemisphaerica* Bartr.

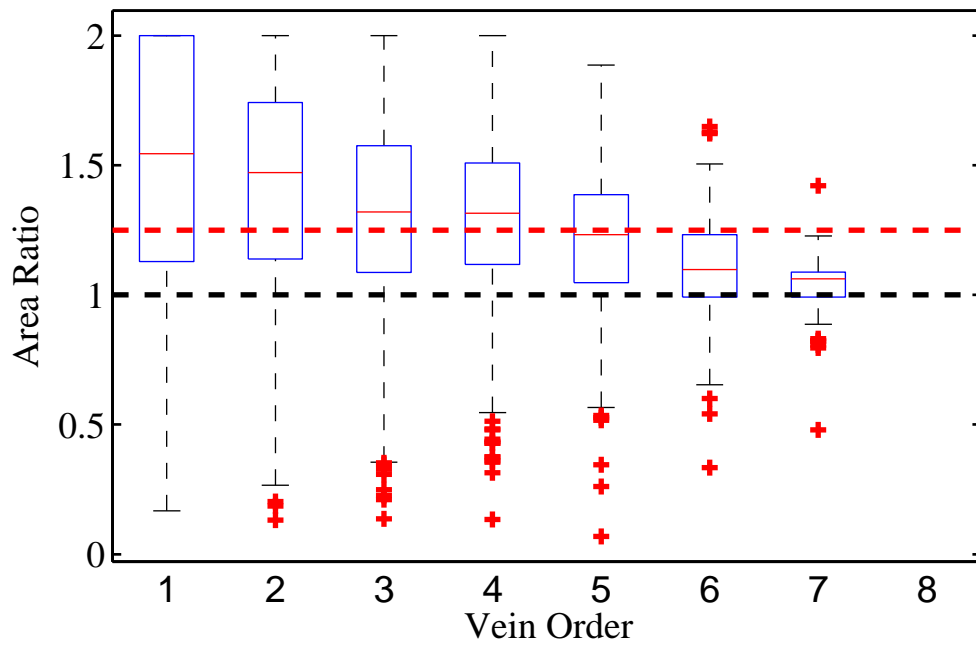

- - - Murrays Law - - - Elastic Similarity

*Pieris forrestii*

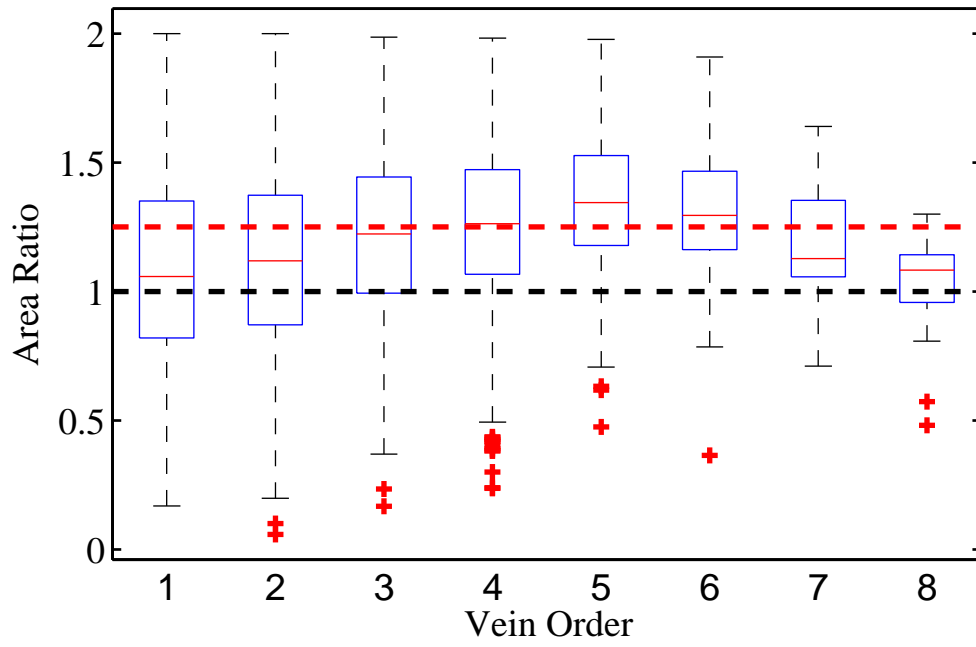

- - - Murrays Law   - - - Elastic Similarity

*Citharexylum fruticosum* var. *villosum*

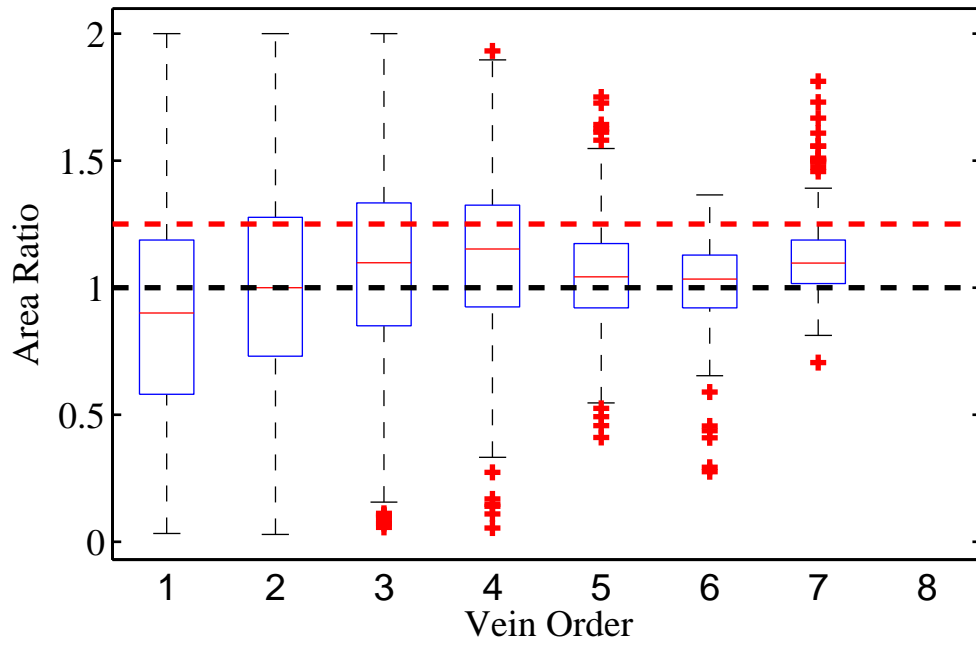

- - - Murrays Law    - - - Elastic Similarity

*Homalium foetidum* (Roxb.) Benth.

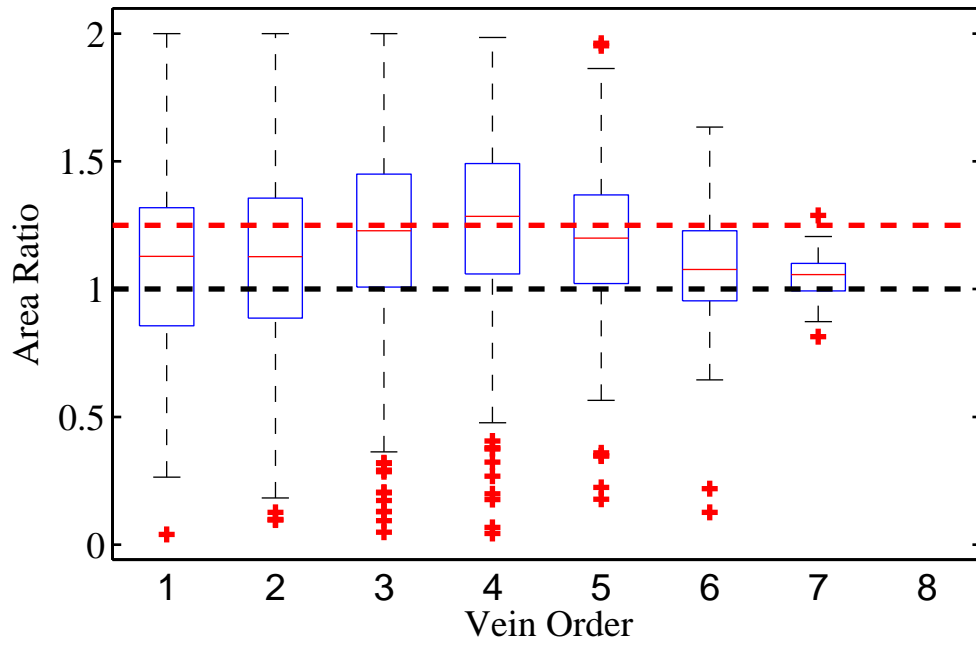

- - - Murrays Law   - - - Elastic Similarity

Adenocalymna comosa

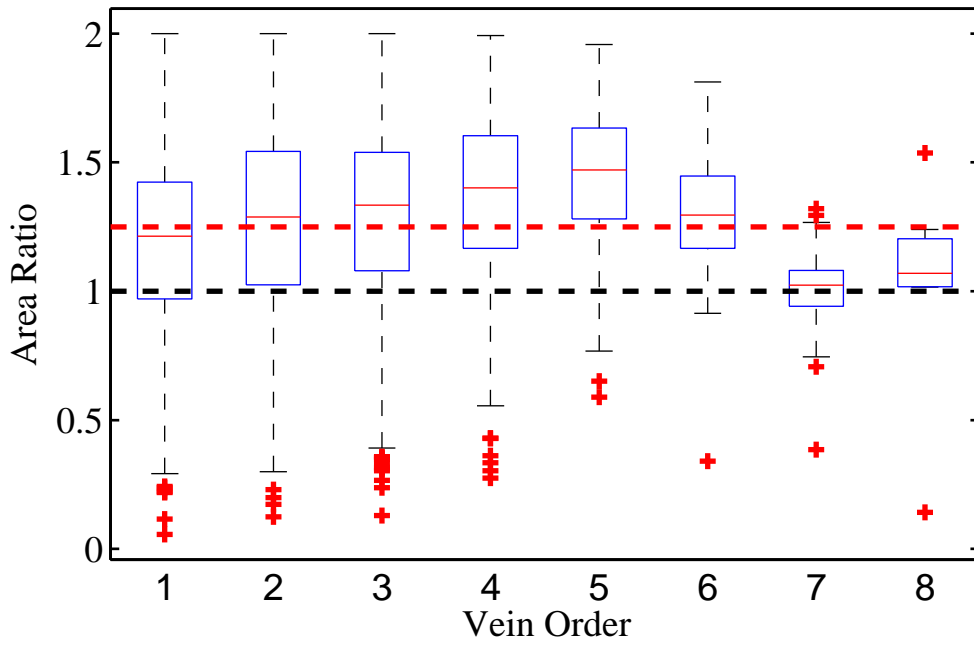

- - - Murrays Law    - - - Elastic Similarity

*Sloanea lasiocoma* Schum

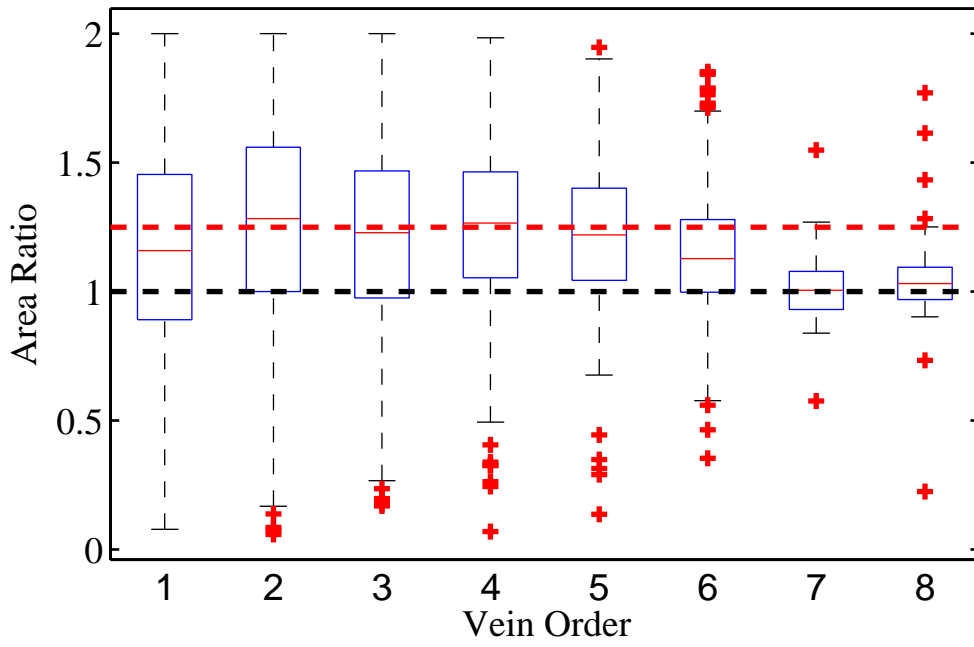

- - - Murrays Law - - - Elastic Similarity

*Crataegus brainerdi* Sarg.

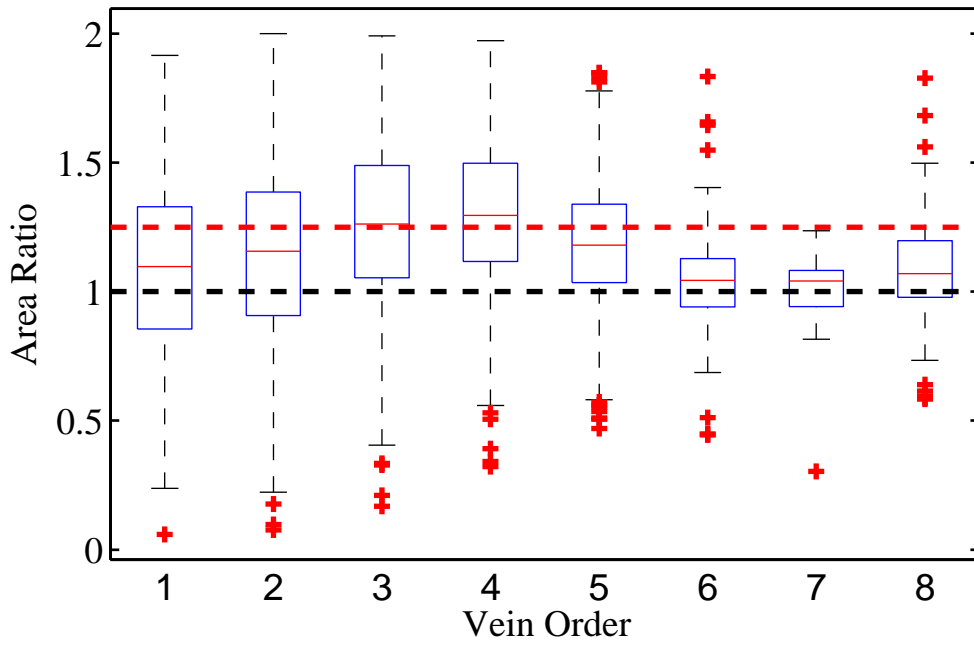

- - - Murrays Law - - - Elastic Similarity

*Ilex latifolia* Thunberg

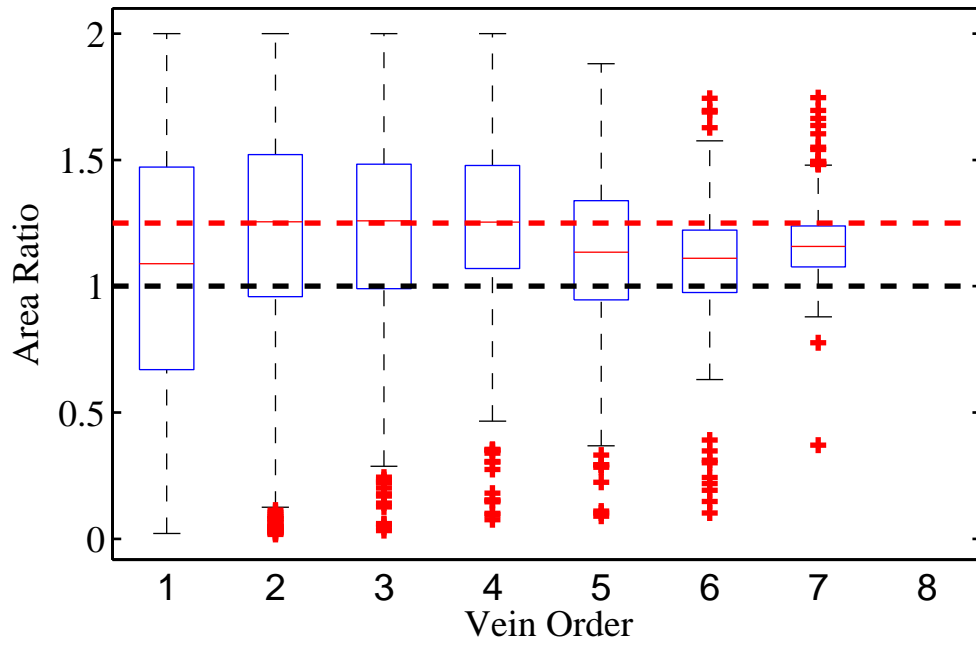



- - - Murrays Law - - - Elastic Similarity

*Annona sericea* Dunal.

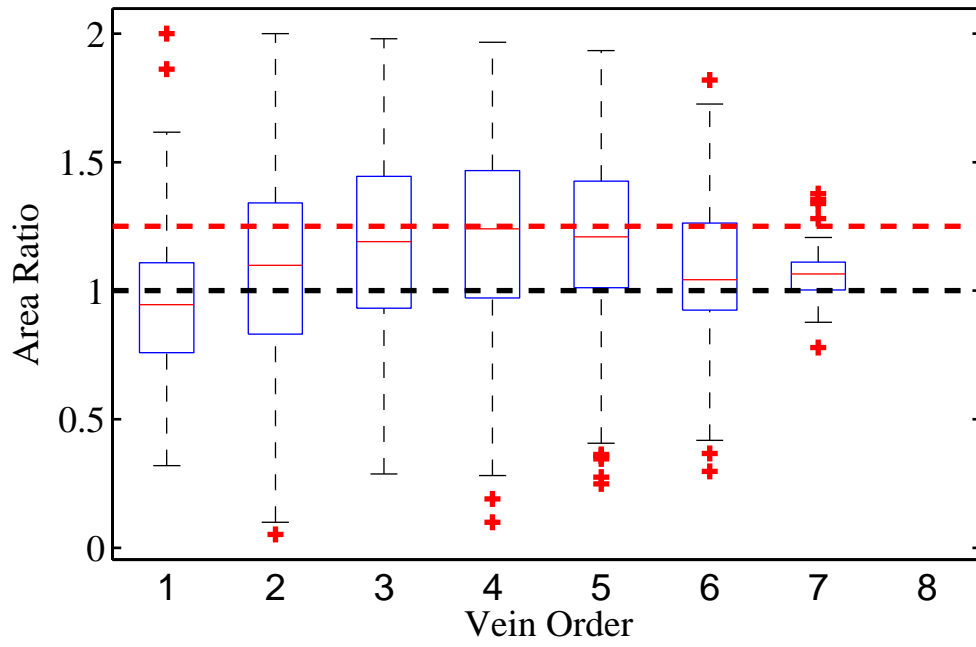

- - - Murrays Law - - - Elastic Similarity

*Begonia apetala* R. Capuron

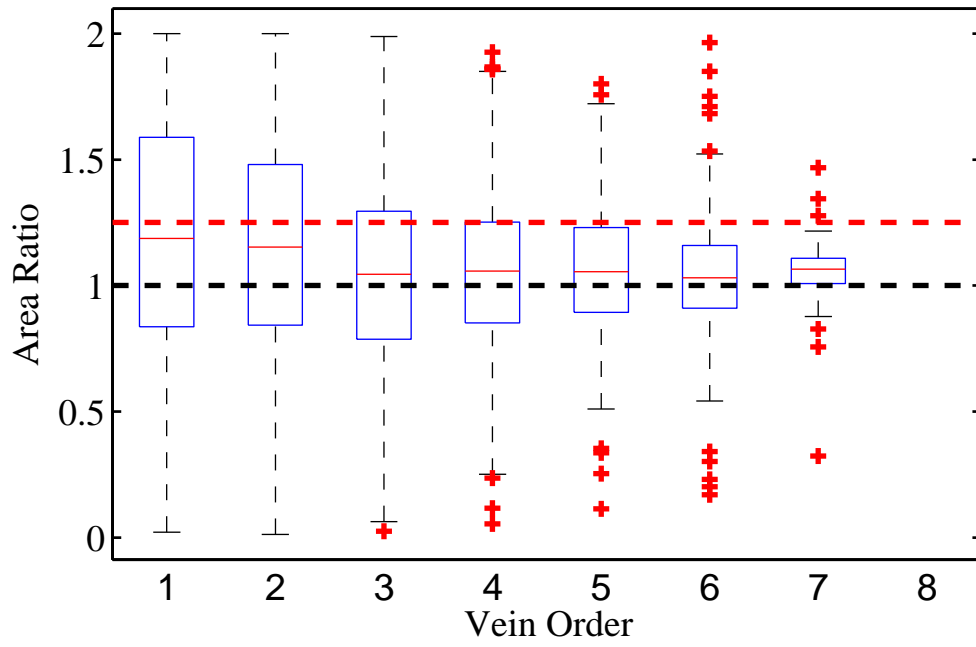

- - - Murrays Law   - - - Elastic Similarity

Bubbia aff. argentea A.C.Sm.

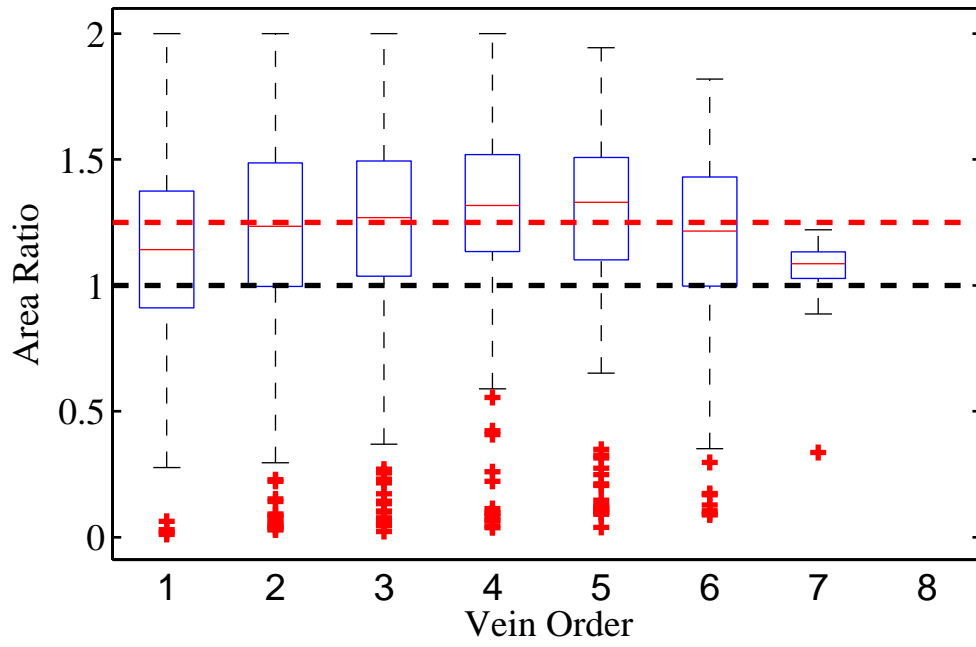

- - - Murrays Law - - - Elastic Similarity

Kayea elmeri Merr.

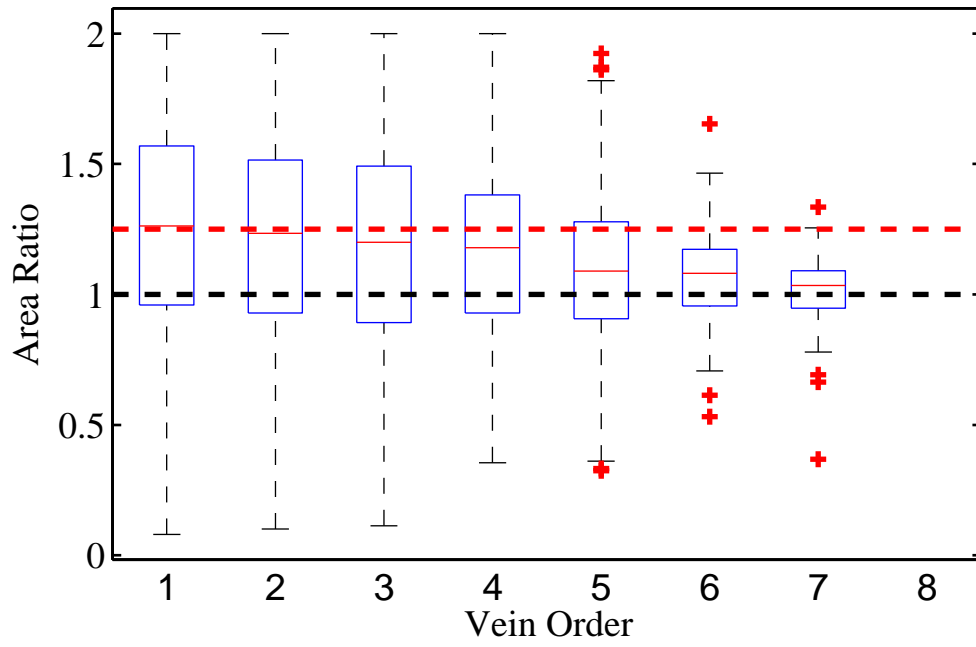

- - - Murrays Law - - - Elastic Similarity

*Hydrangea anomala* D. Don

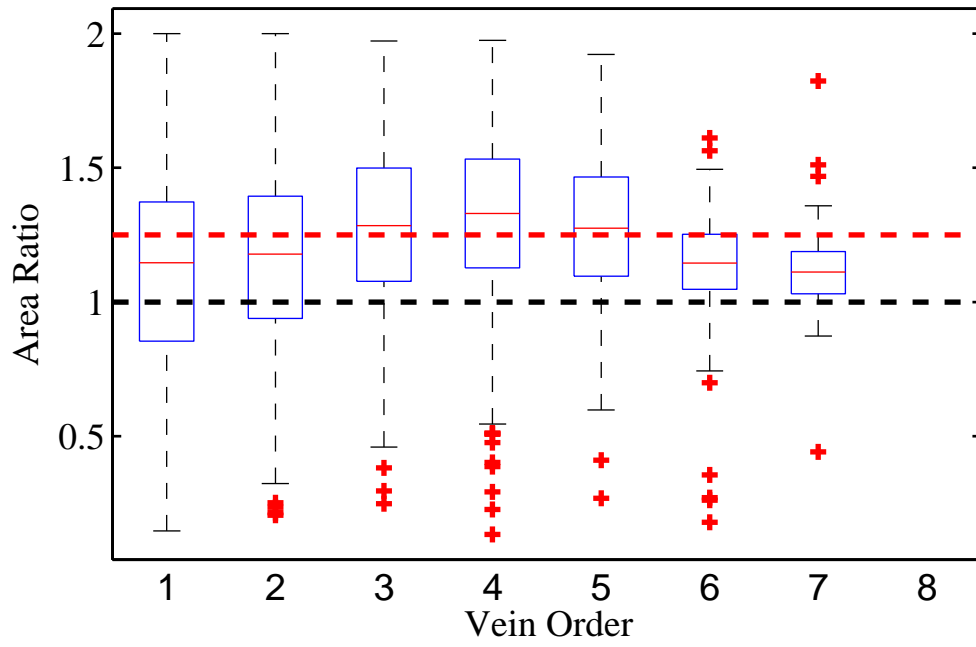

- - - Murrays Law   - - - Elastic Similarity

*Quercus spinosa* Miyabei (Kaw.) Hayata

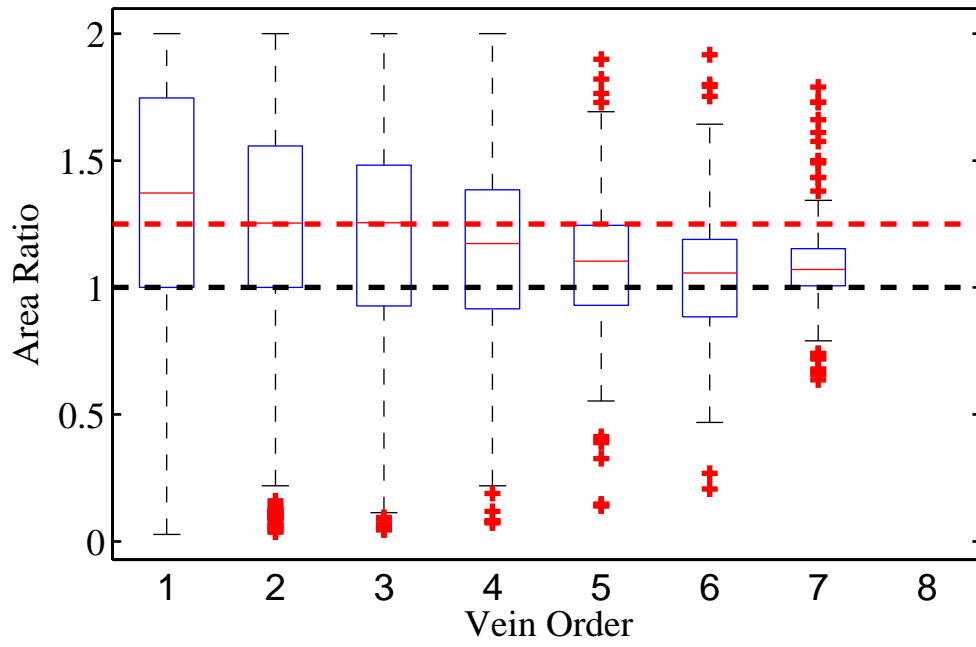

- - - Murrays Law - - - Elastic Similarity

*Rinorea pubiflora* (Benth.) Sprague & Sandw.

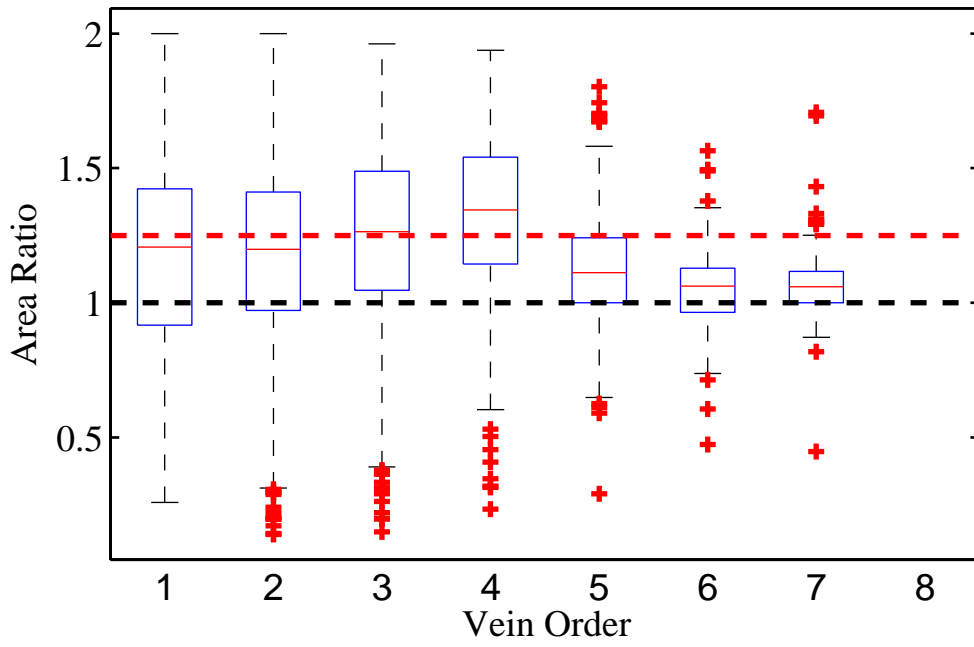

- - - Murrays Law   - - - Elastic Similarity

*Smeathmannia pubescens* Soland. Ex R. Br.

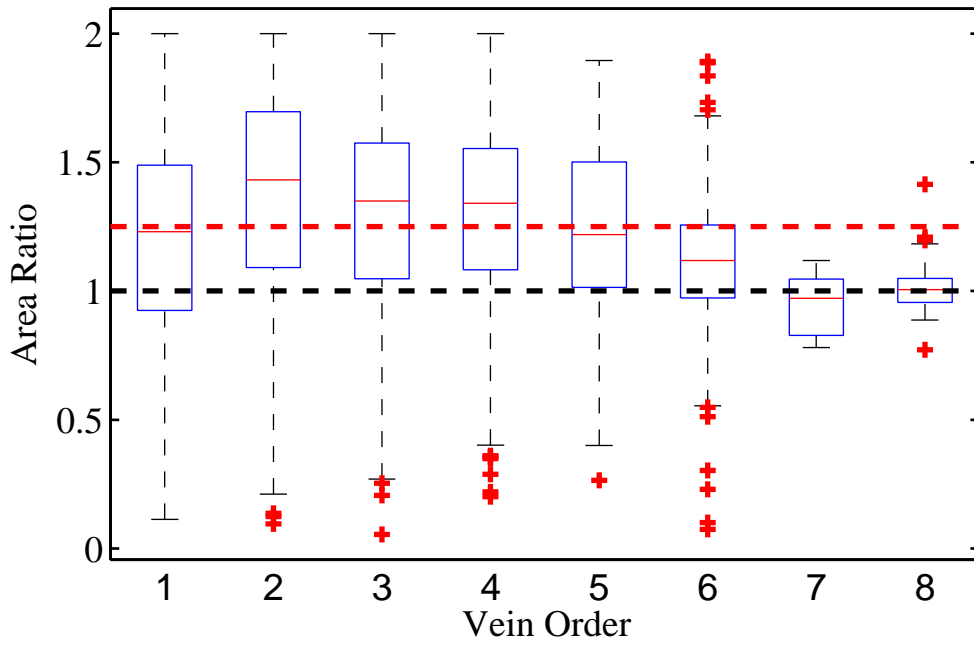



- - - Murrays Law   - - - Elastic Similarity

*Urechites andrieuxii* Muell. Arg.

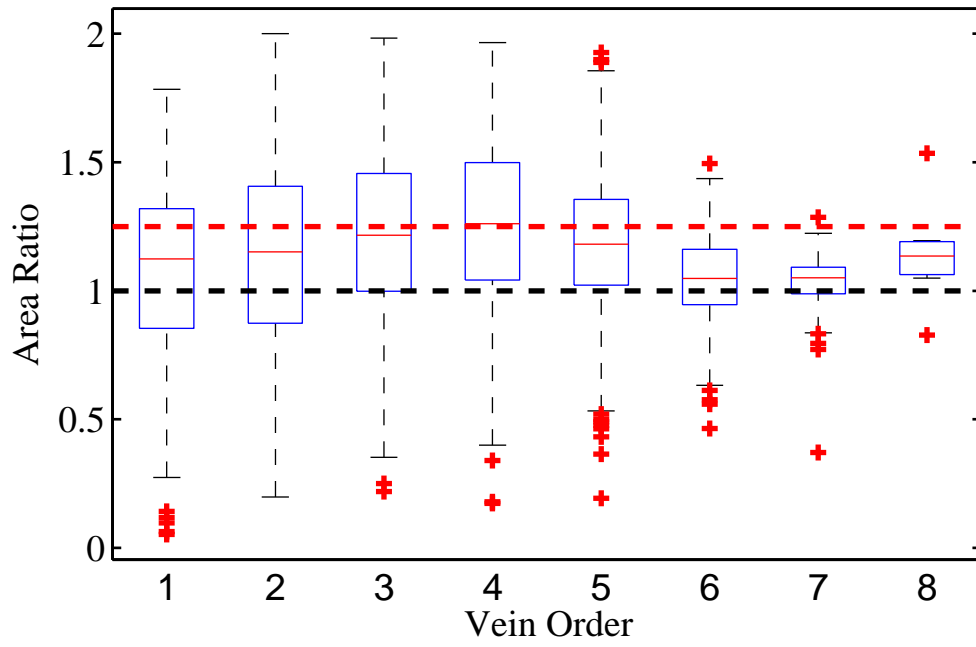

- - - Murrays Law - - - Elastic Similarity

*Dacryodes rugosa* (Lam)

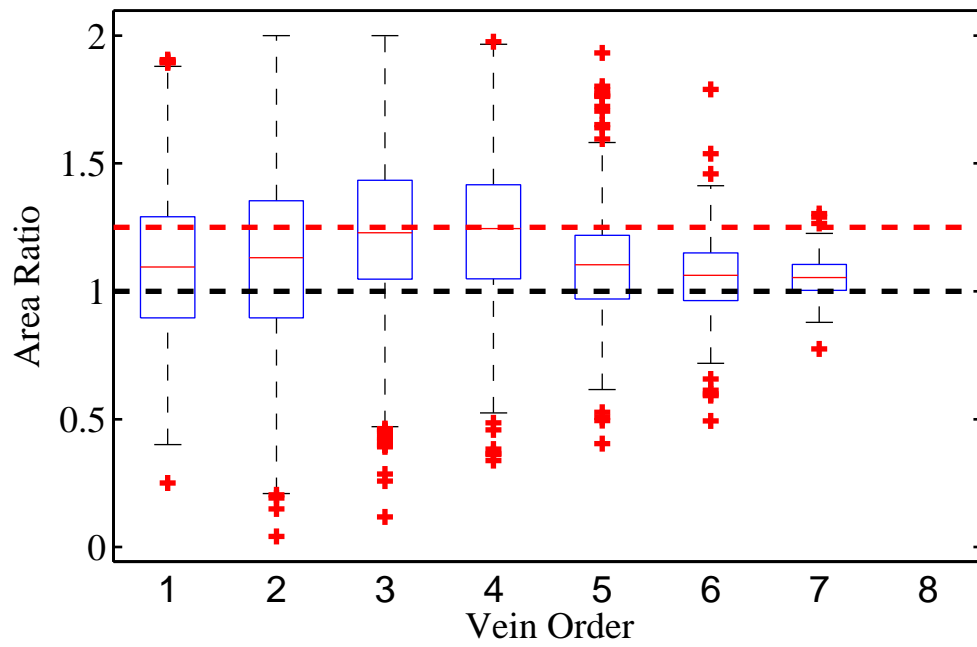

- - - Murrays Law   - - - Elastic Similarity

*Fraxinus koehneana* Lingelsh.

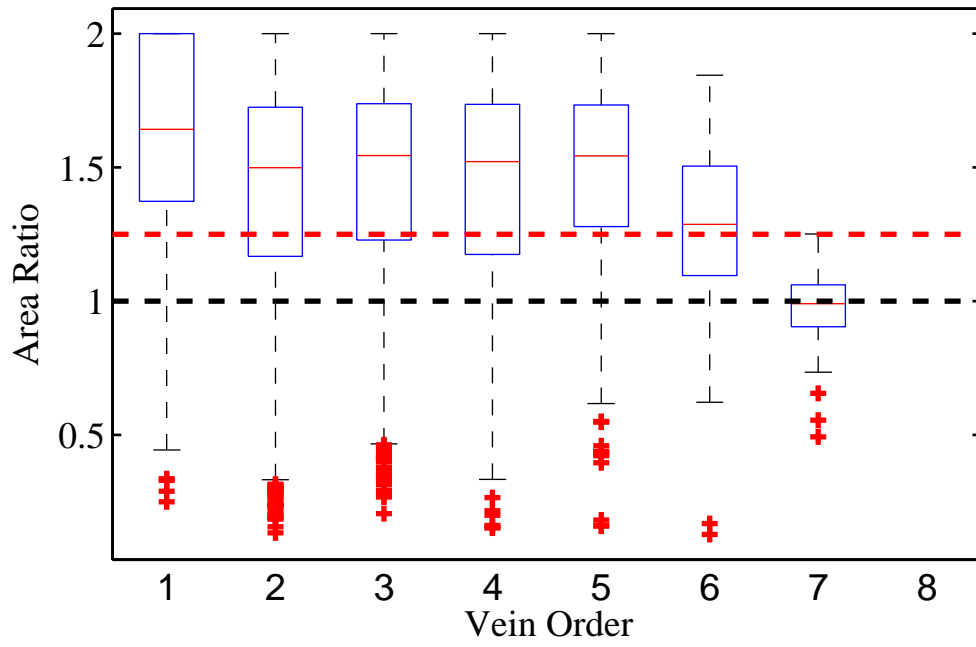

- - - Murrays Law - - - Elastic Similarity

*Securidaca lamarckii* Griseb.

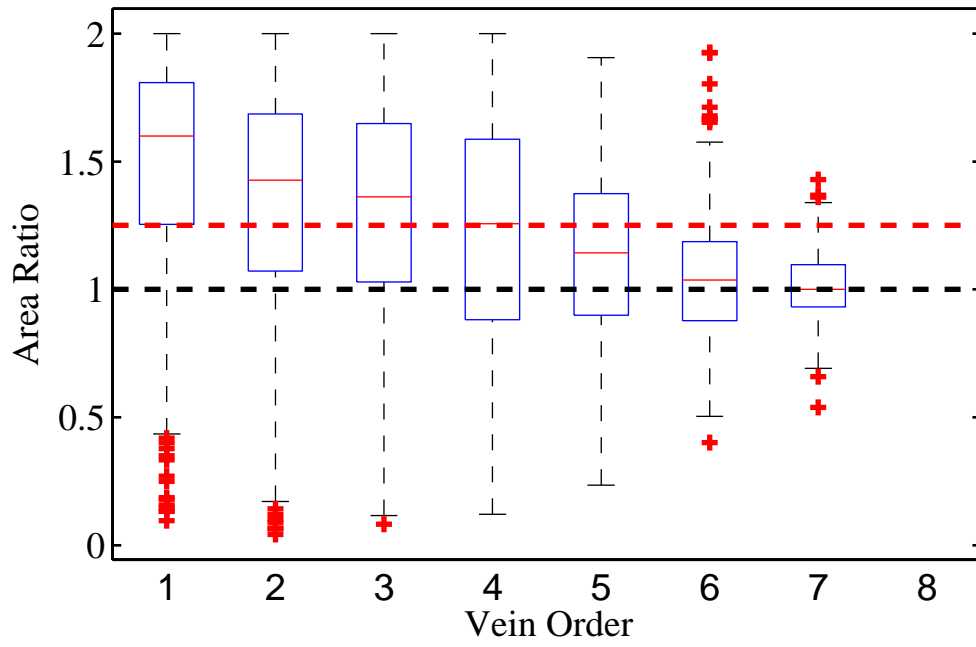

- - - Murrays Law   - - - Elastic Similarity

*Diospyros longibracteata* H. Lec.

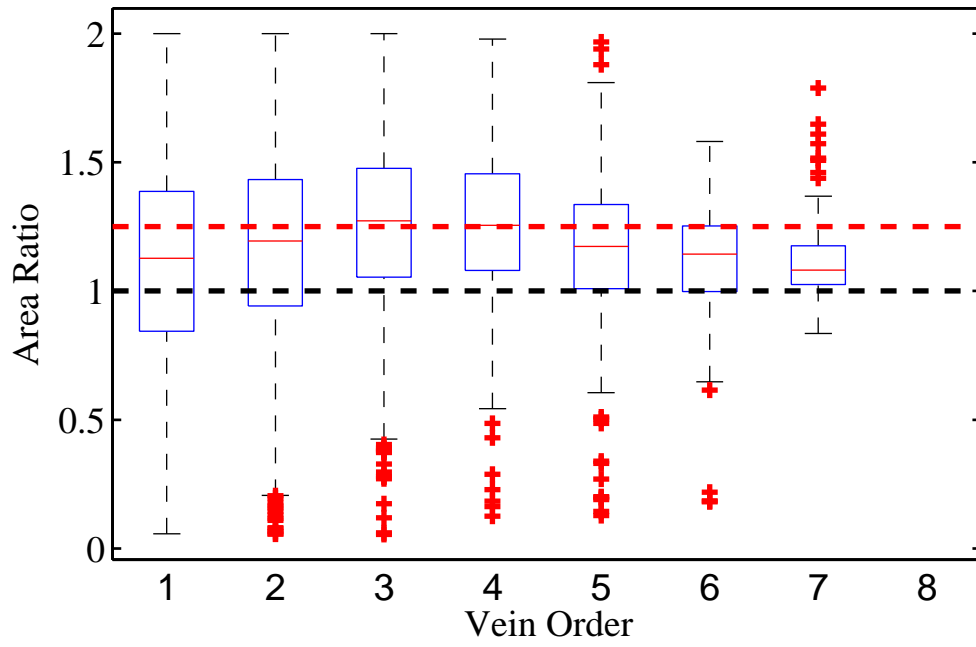

- - - Murrays Law   - - - Elastic Similarity

*Suregada glomeratum* (Bl.) Hassk.

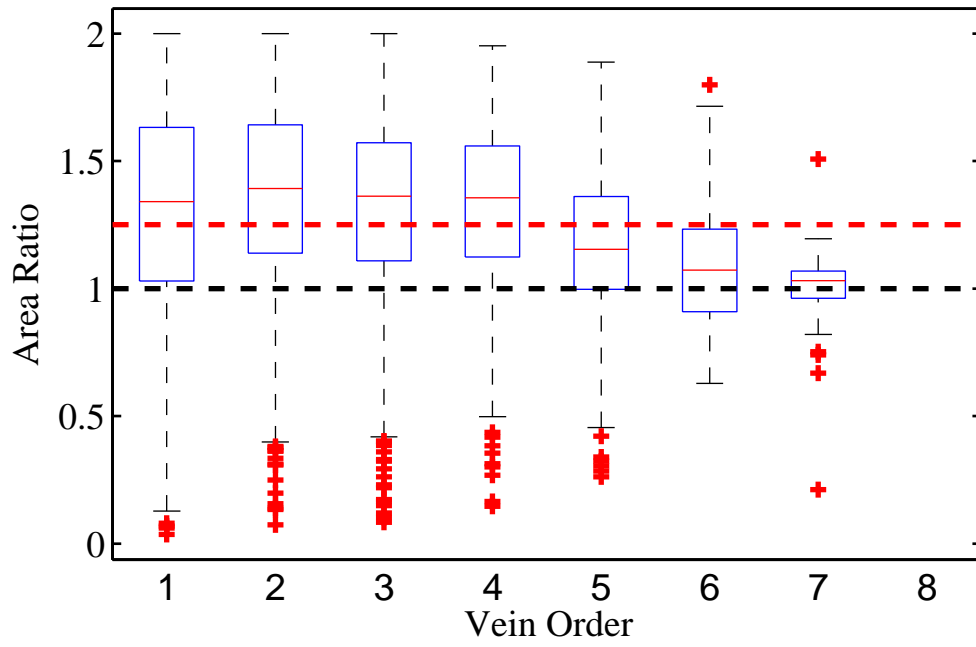

- - - Murrays Law   - - - Elastic Similarity

*Cordia dichotoma* Forst.F.

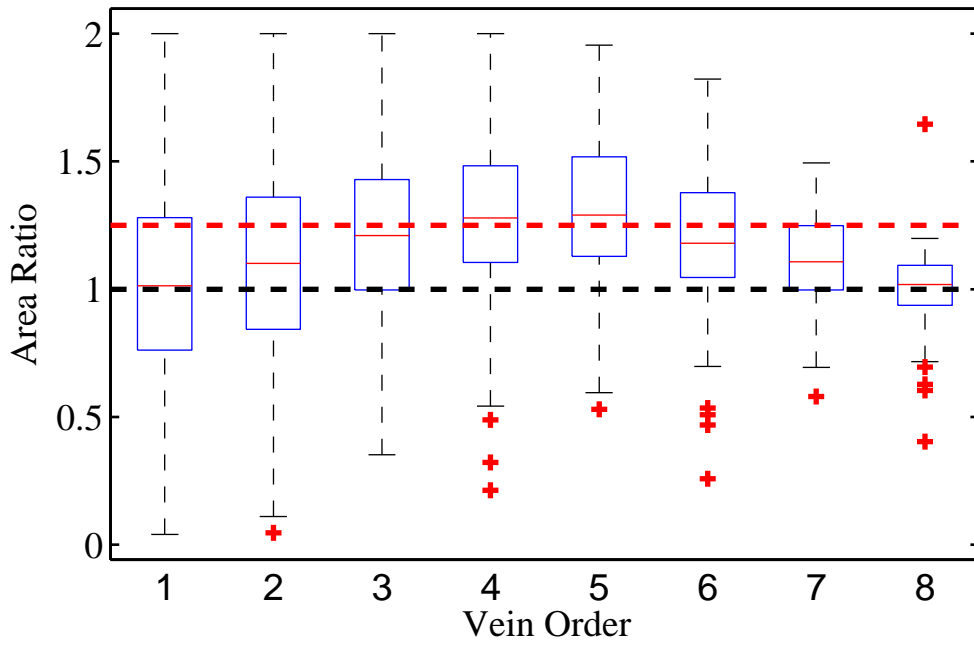

- - - Murrays Law - - - Elastic Similarity

Ochna dubia

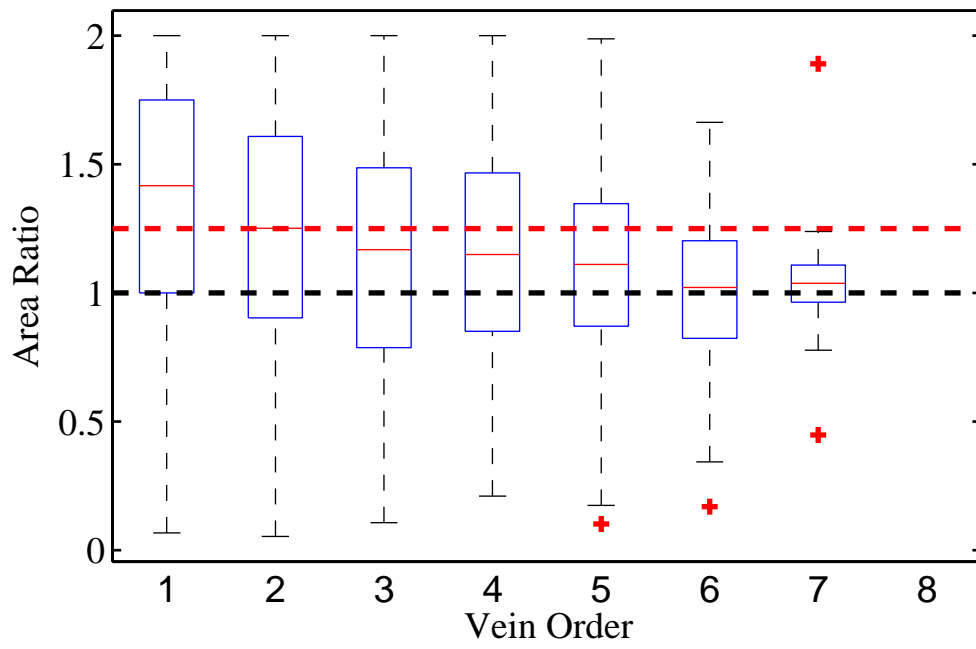



- - - Murrays Law - - - Elastic Similarity

*Canarium perkinsiae* Merr.

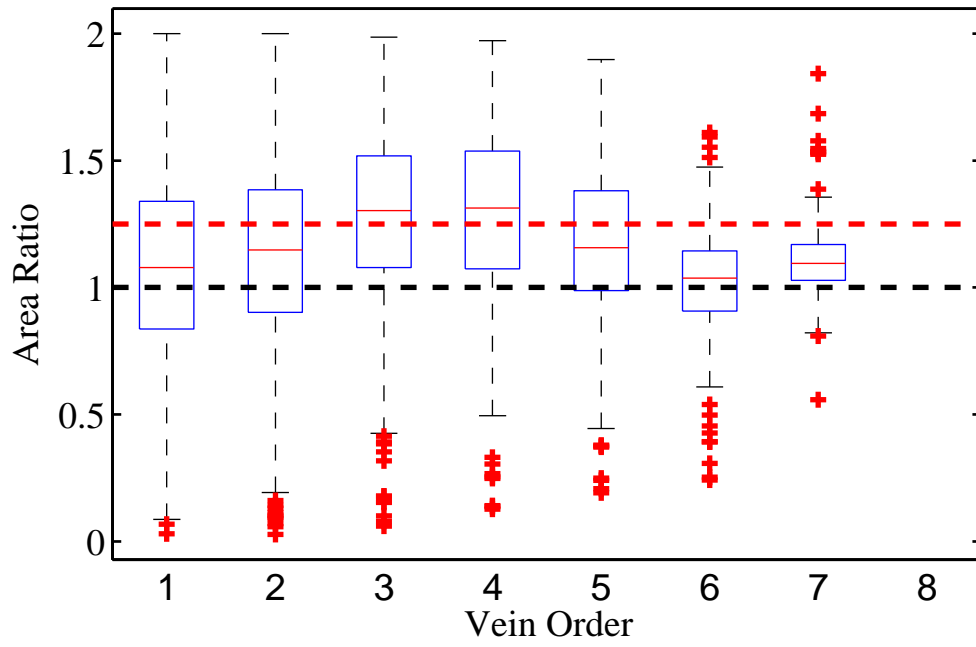

- - - Murrays Law   - - - Elastic Similarity

*Annona reticulata* L.

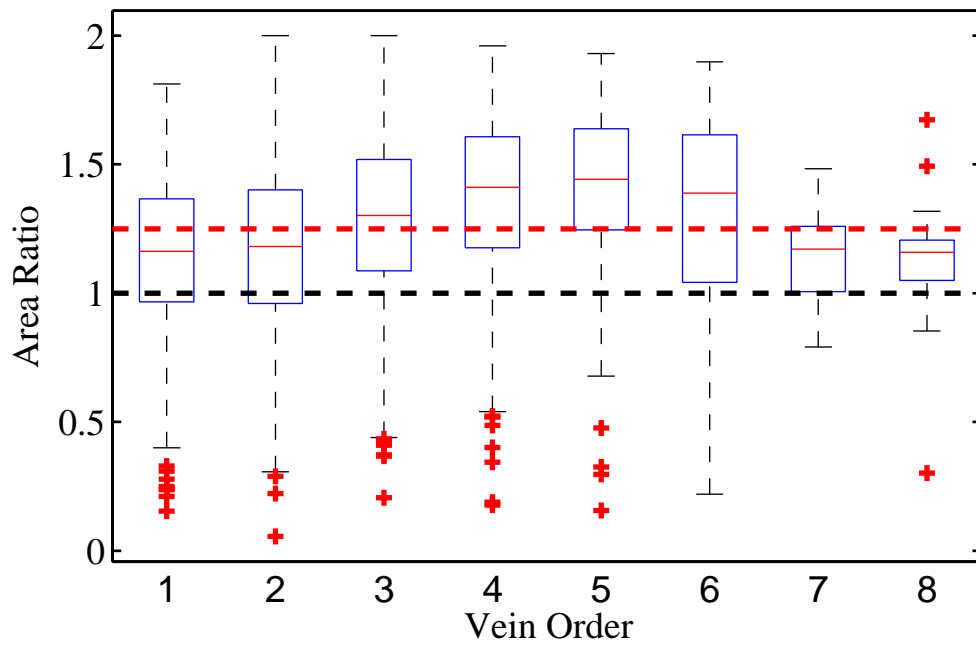

- - - Murrays Law - - - Elastic Similarity

*Mandevilla hispida tomentosa* Muell. Arg.

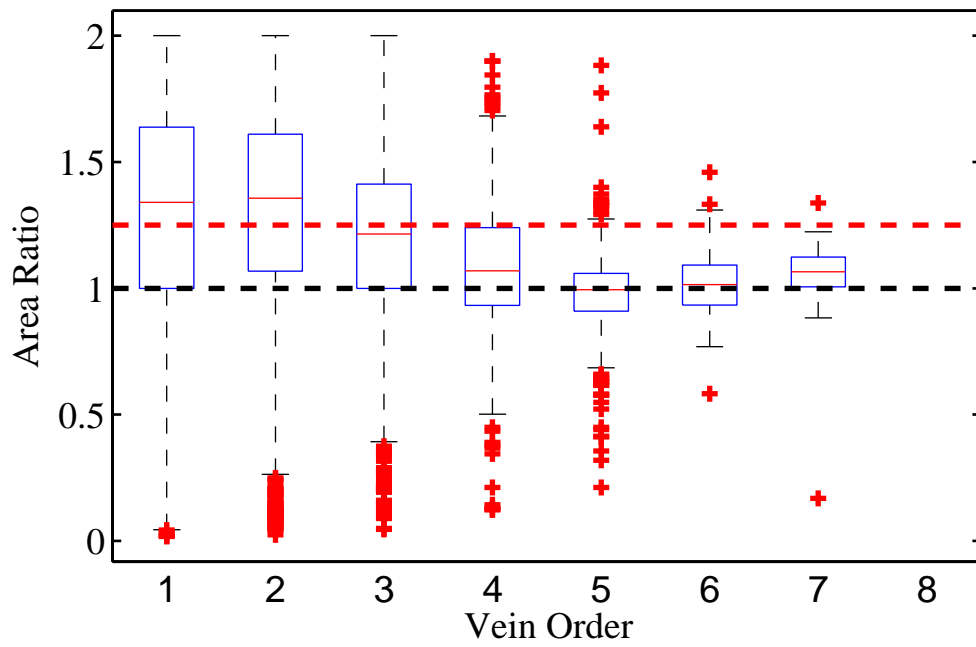

- - - Murrays Law - - - Elastic Similarity

*Securidaca volubilis* L.

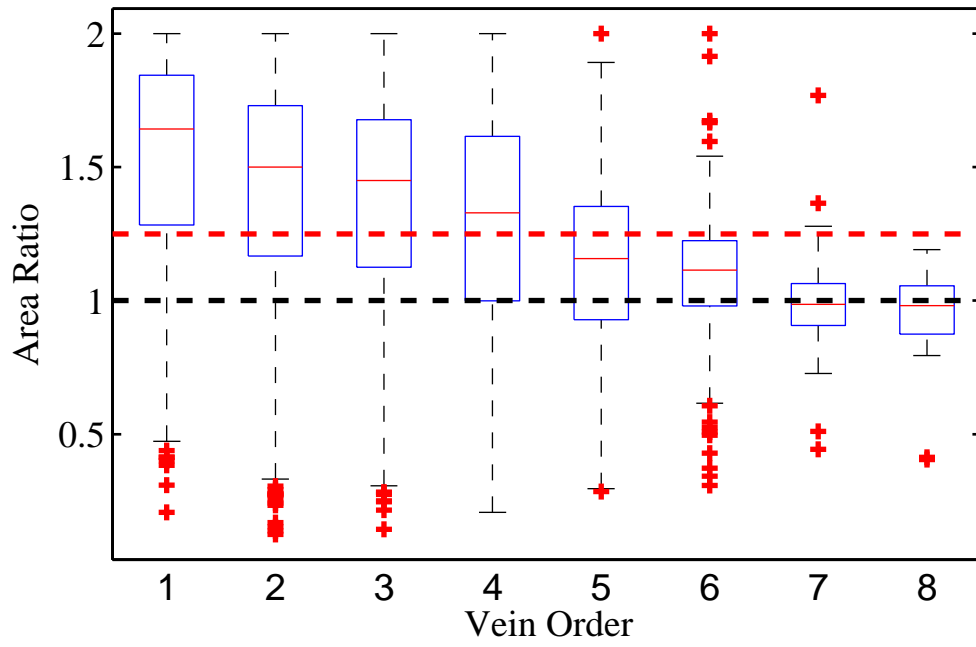

- - - Murrays Law - - - Elastic Similarity

*Oncoba spinosa* Forsk.

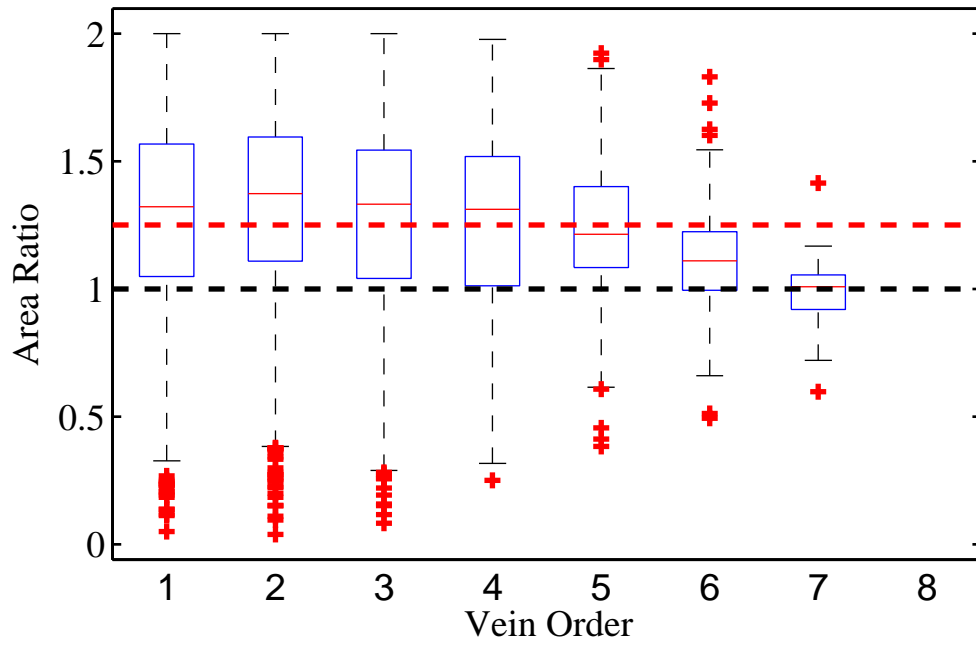

- - - Murrays Law - - - Elastic Similarity

*Rinorea lindeniana* (Tulasne) Kuntze

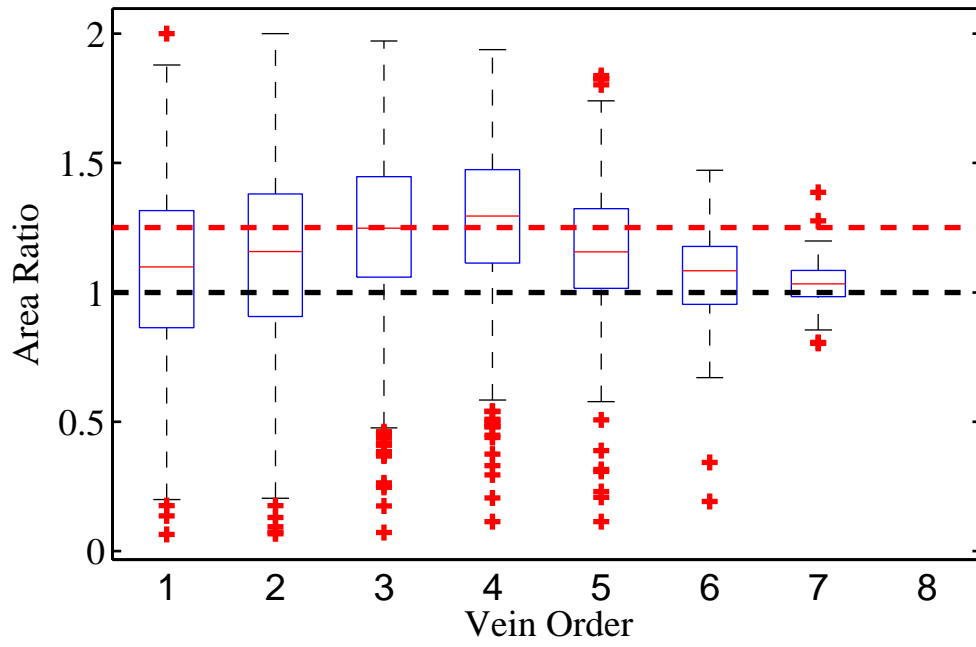

- - - Murrays Law - - - Elastic Similarity

Quercus donarium Nakai

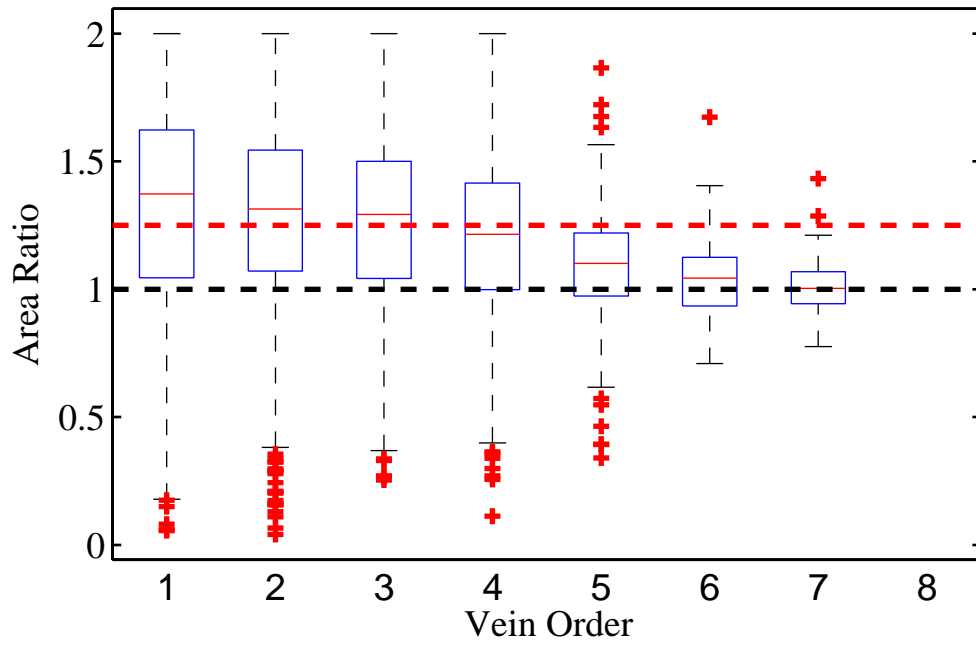

- - - Murrays Law   - - - Elastic Similarity

*Lyonsia reticulata* F.V. Muell.

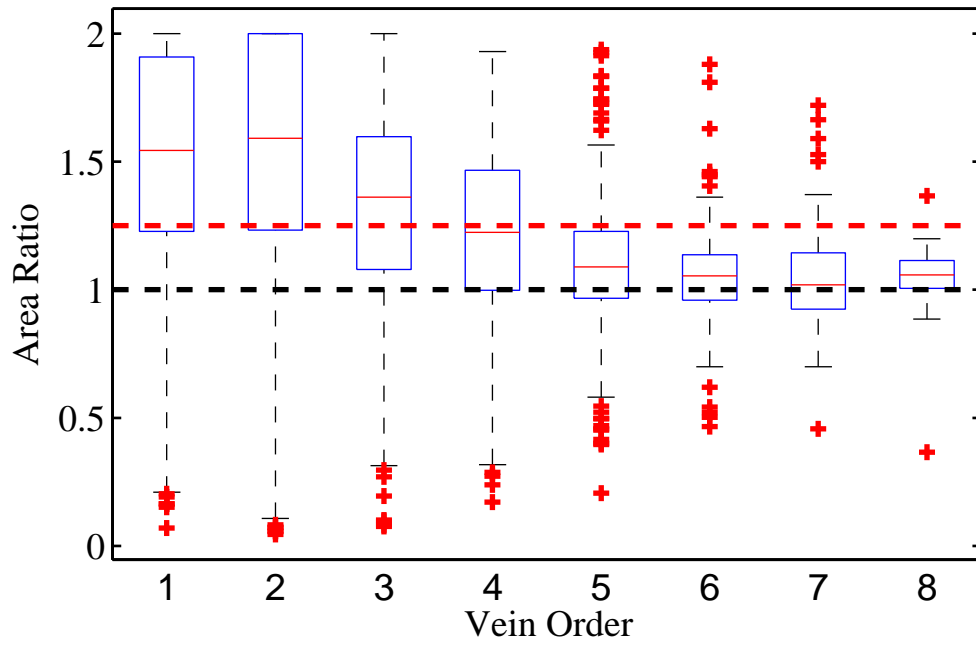



- - - Murrays Law   - - - Elastic Similarity

*Cassipourea lescotiana* J.-G. Adam

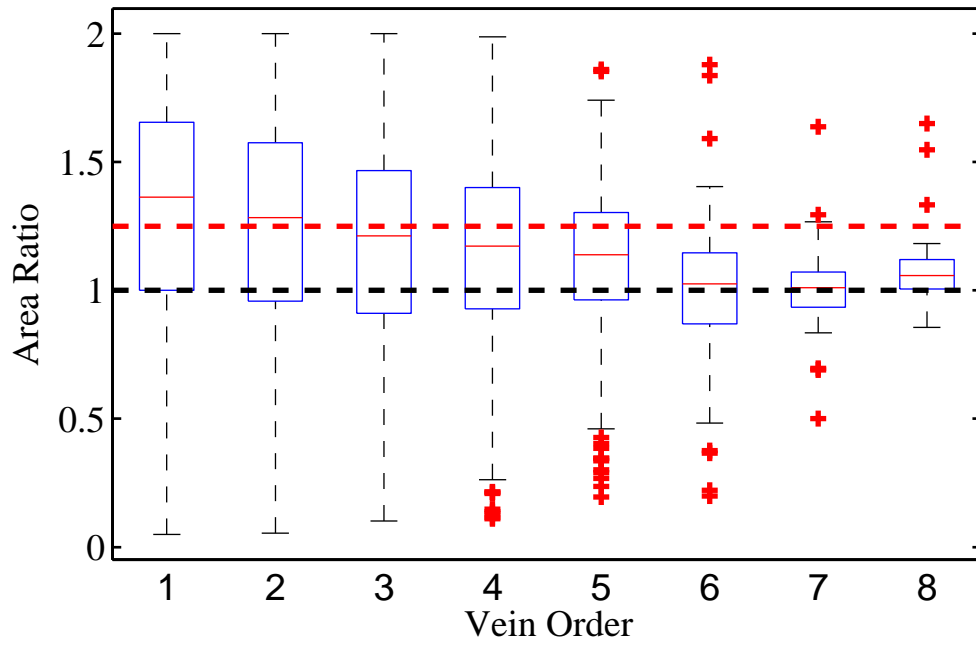

- - - Murrays Law - - - Elastic Similarity

Canarium luzonicum (Miq.)

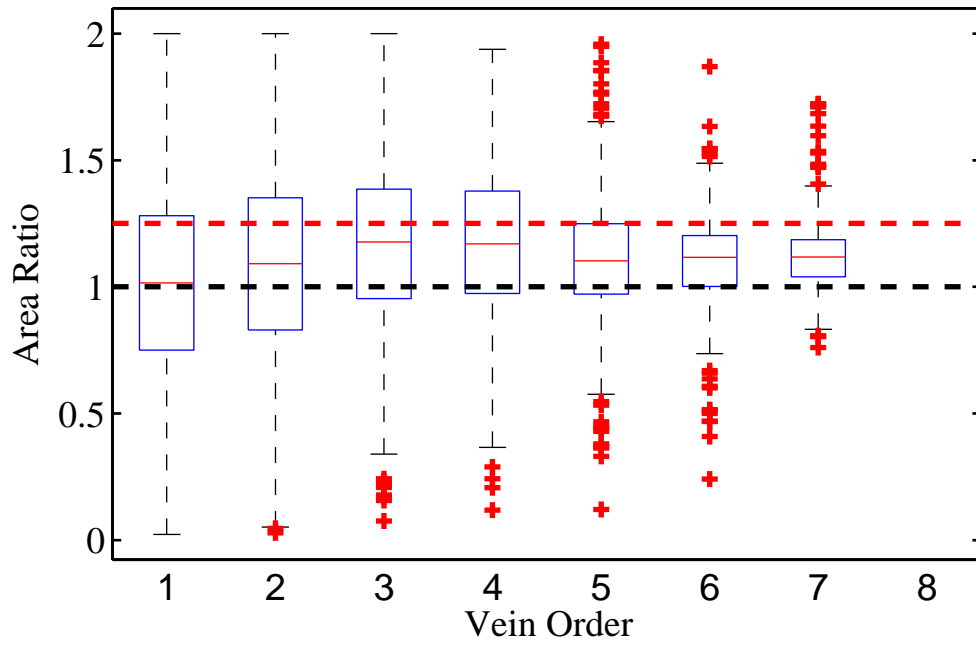

- - - Murrays Law - - - Elastic Similarity

Populus maximowiczii Henry

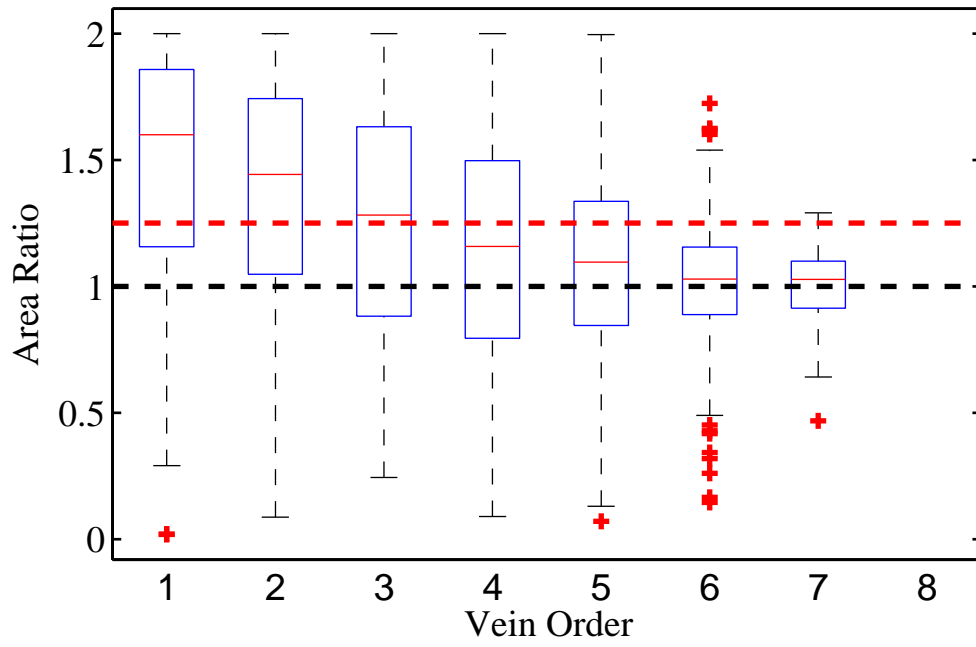

- - - Murrays Law - - - Elastic Similarity

*Betula jacquemontii* Spach

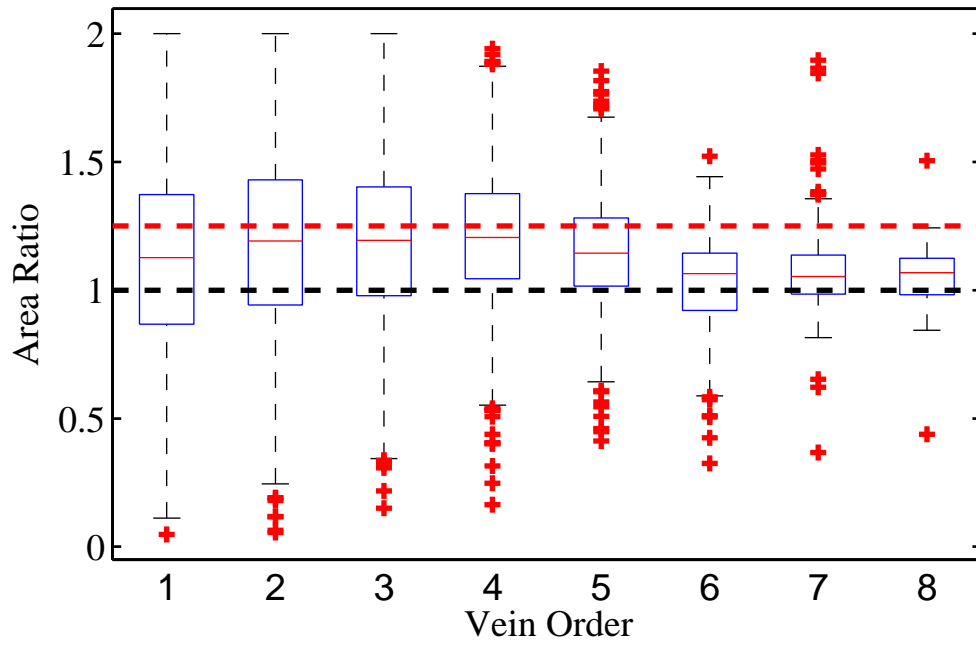

- - - Murrays Law - - - Elastic Similarity

Dyera lowii Hook. F.

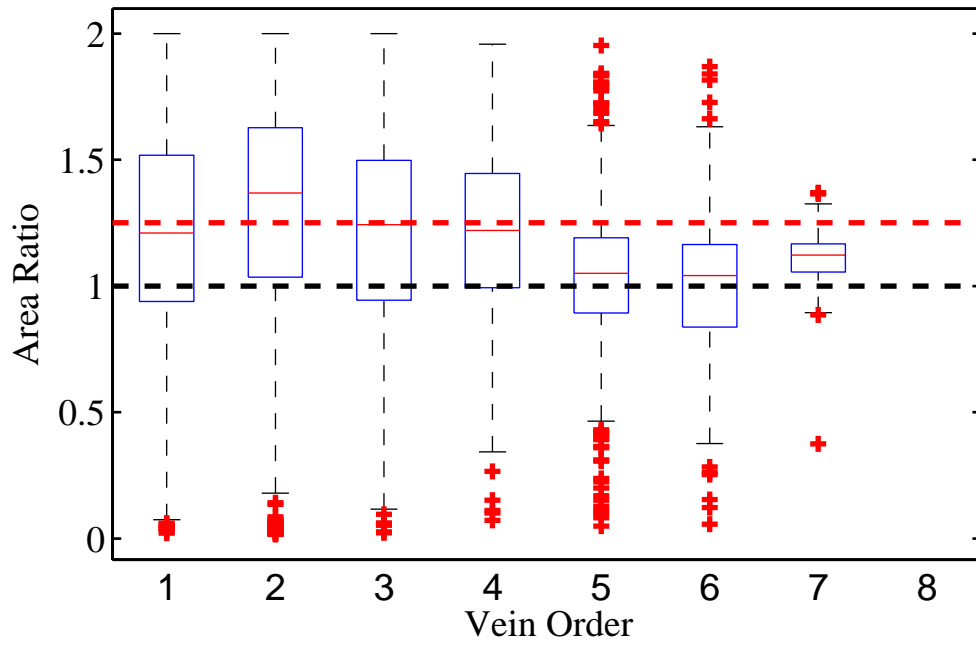

- - - Murrays Law - - - Elastic Similarity

*Salix cantoniensis* Hance

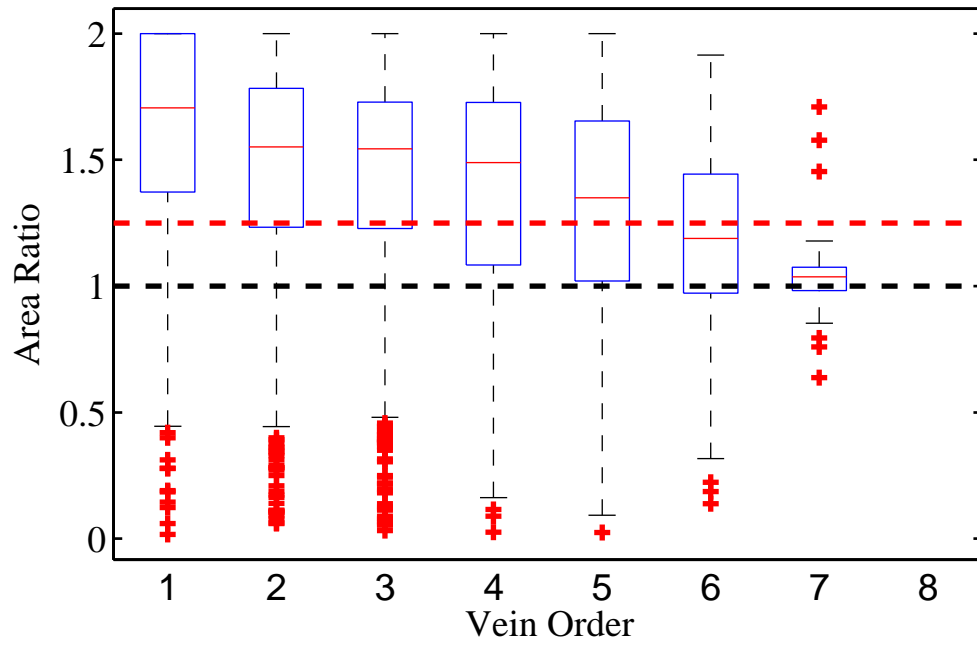

- - - Murrays Law - - - Elastic Similarity

Dracontomelon dao (Blco.) Merr. & Rolfe

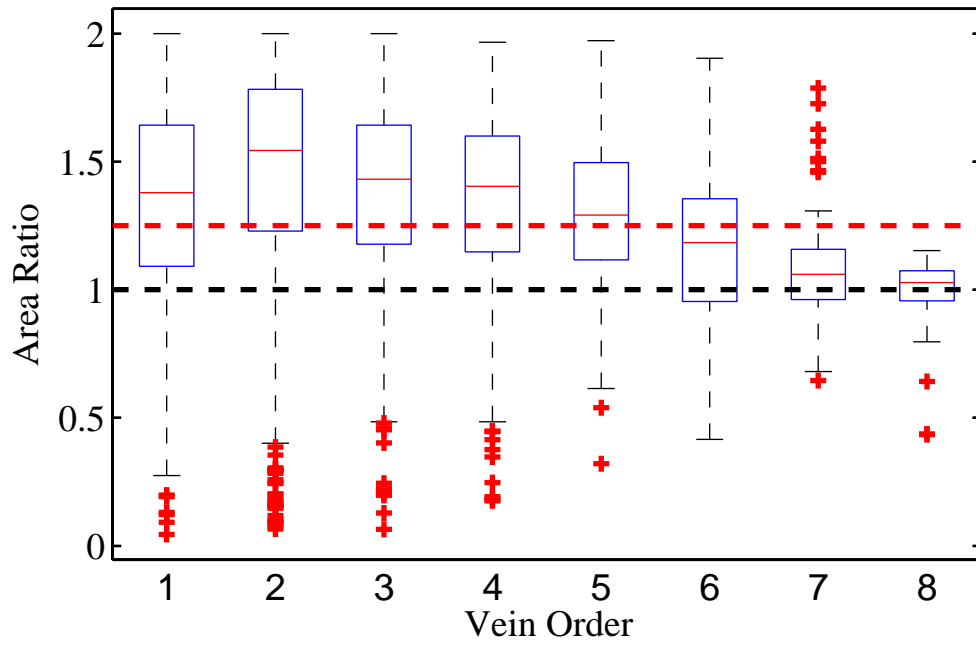

- - - Murrays Law - - - Elastic Similarity

Parishia maingayi Hook.F.

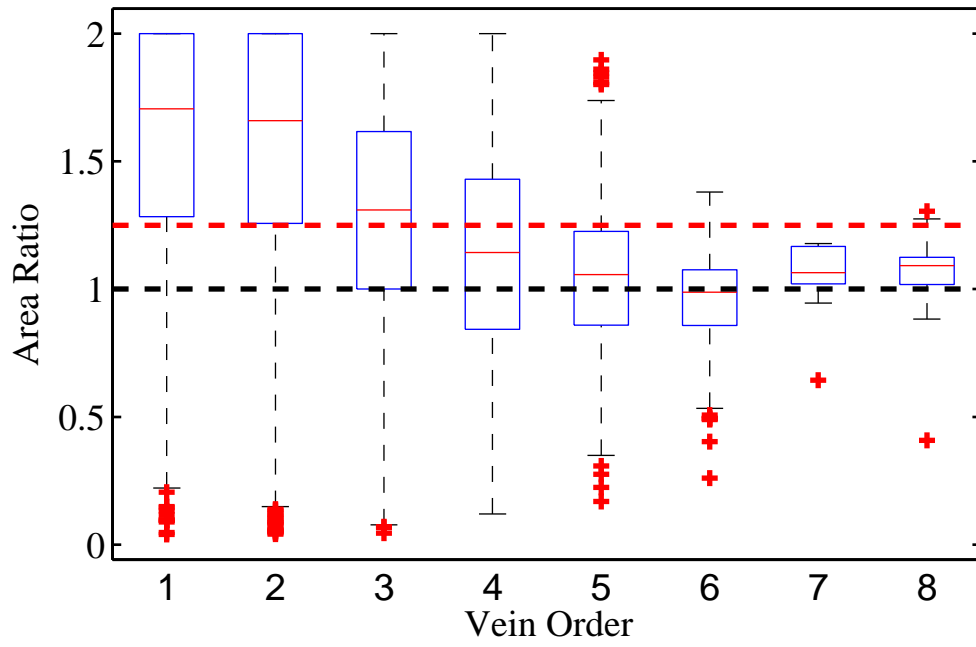



- - - Murrays Law - - - Elastic Similarity

*Tilia chingiana* Hu & Chang

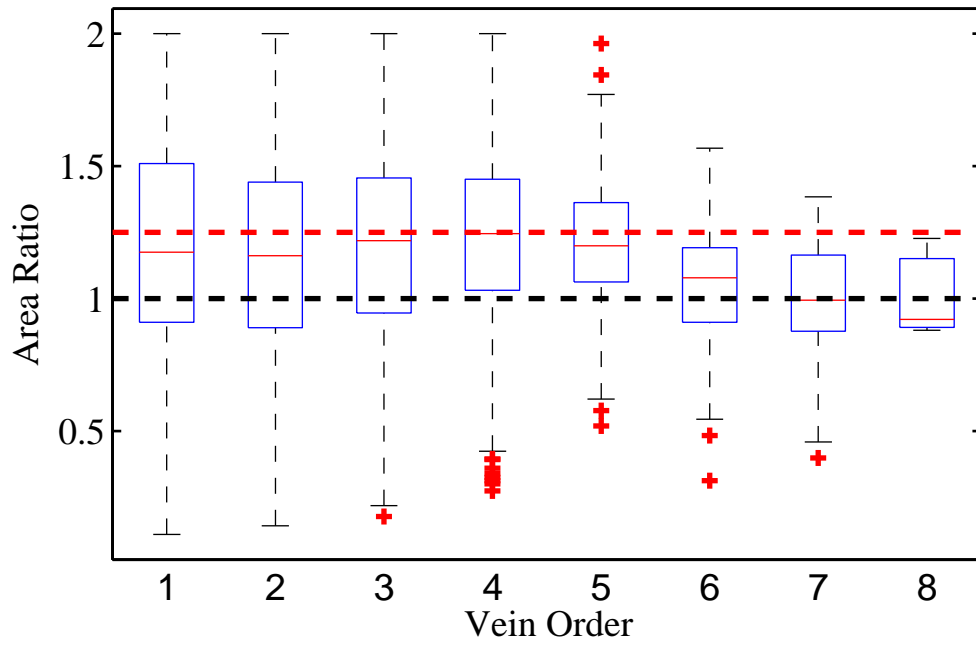

- - - Murrays Law - - - Elastic Similarity

*Paropsia grewioides* Welm.

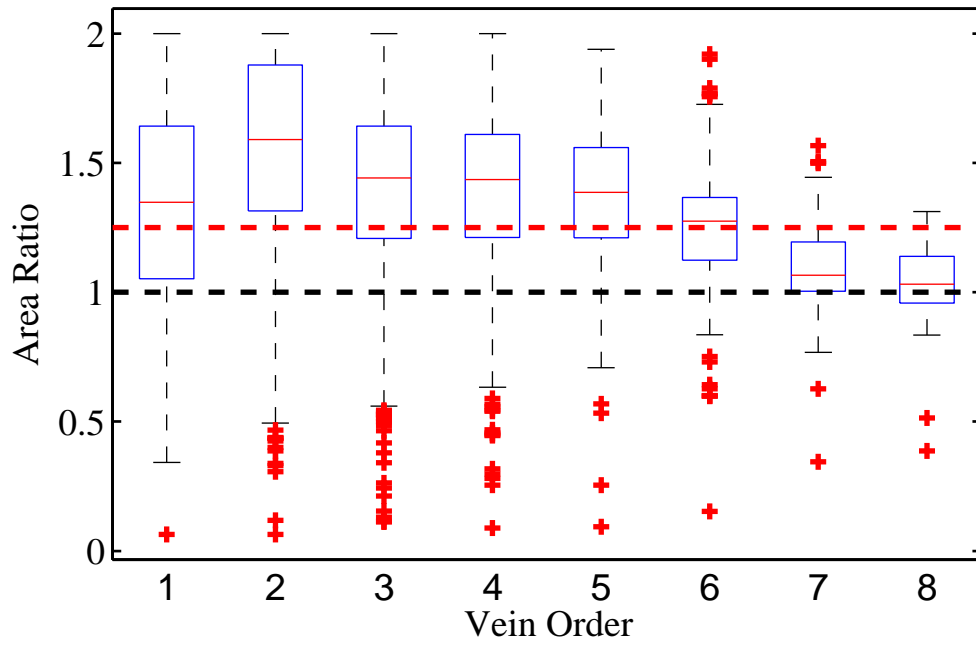

- - - Murrays Law - - - Elastic Similarity

Ribes glandulosum Grauer

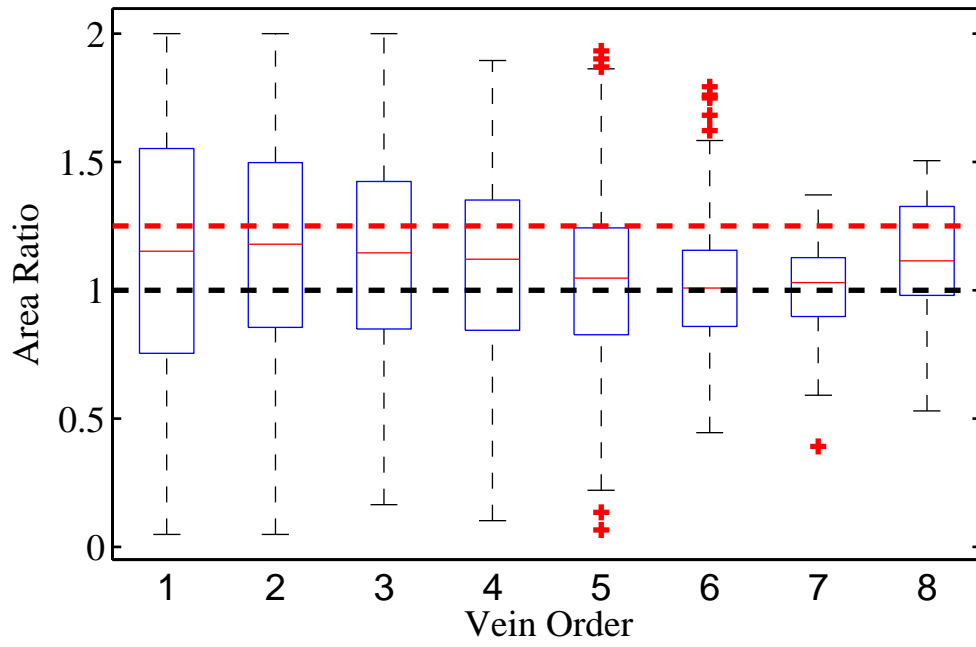

- - - Murrays Law - - - Elastic Similarity

*Ludia sessiliflora* Lam.

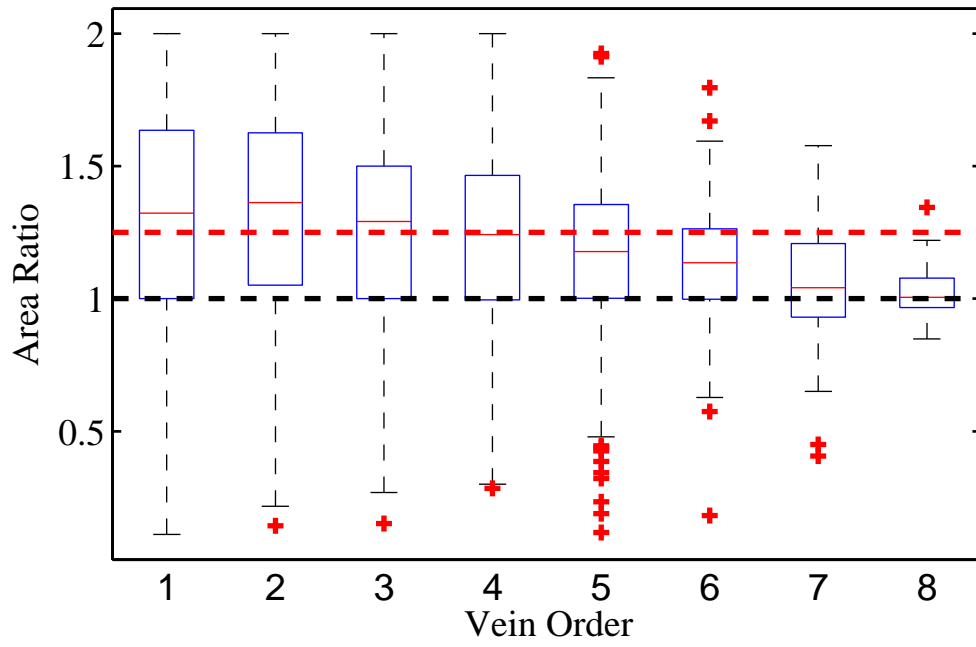

- - - Murrays Law - - - Elastic Similarity

*Hydnocarpus yatesii* Merr.

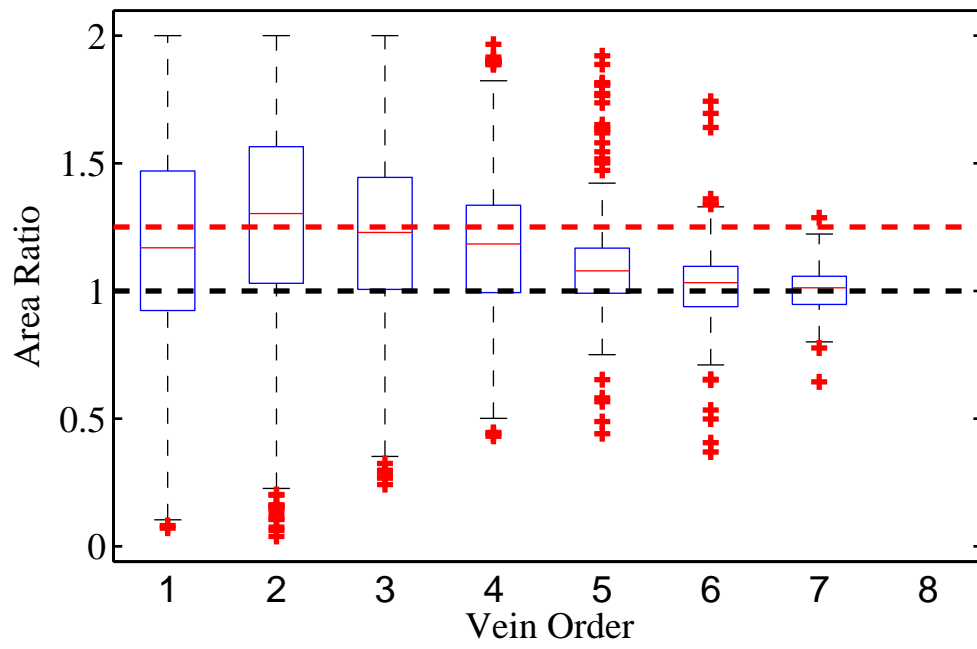

- - - Murrays Law - - - Elastic Similarity

Hecostemon dasygynus Blake

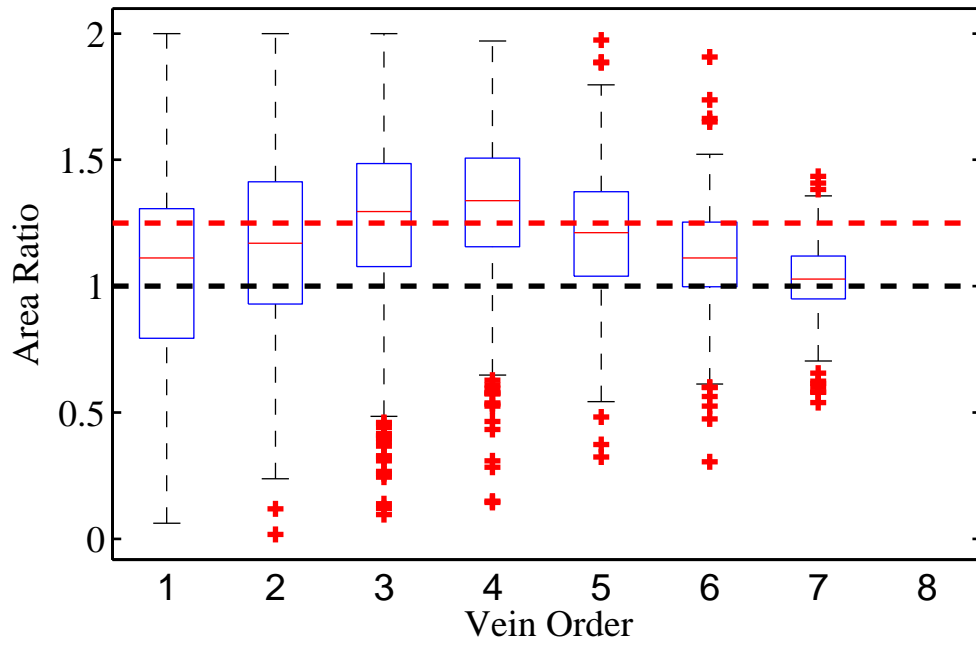

- - - Murrays Law - - - Elastic Similarity

*Quercus skinneri* Benth.

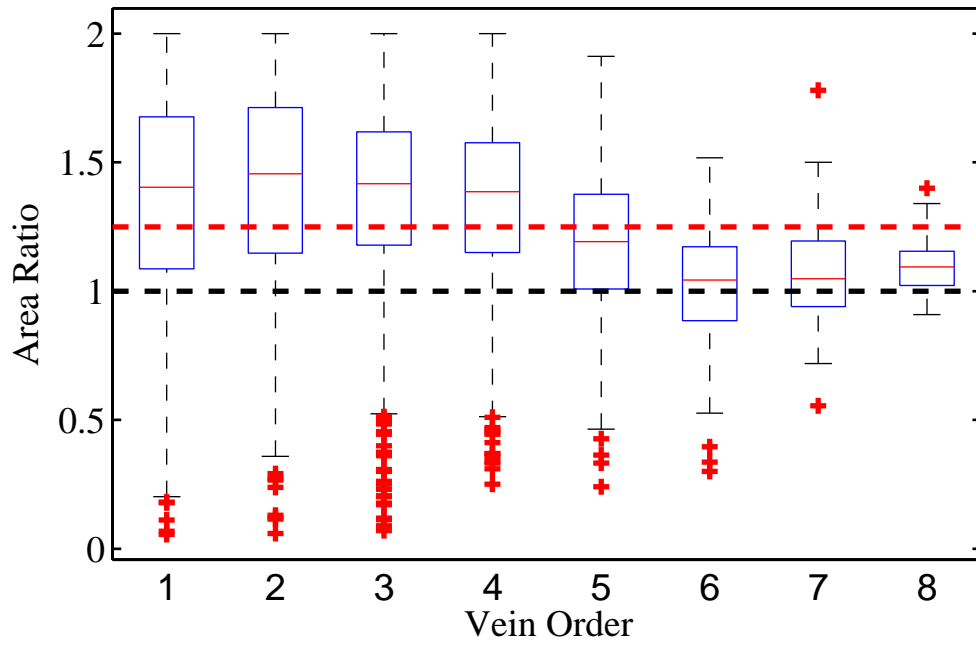

- - - Murrays Law   - - - Elastic Similarity

*Phyllostemonodaphne geminiflora* (Meissn.) Kost.

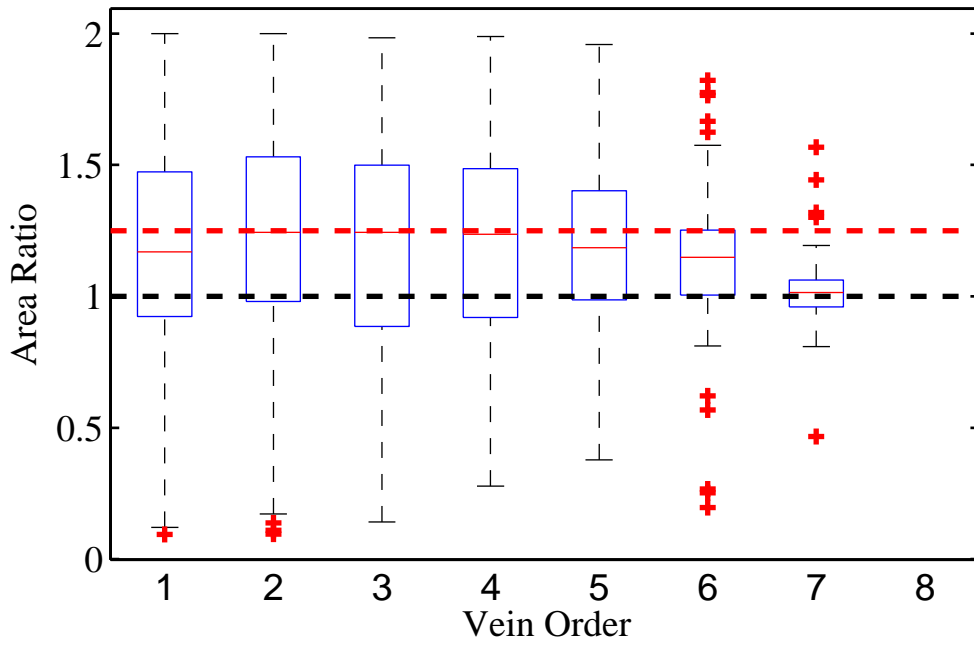



- - - Murrays Law - - - Elastic Similarity

Trema mollis Lour.

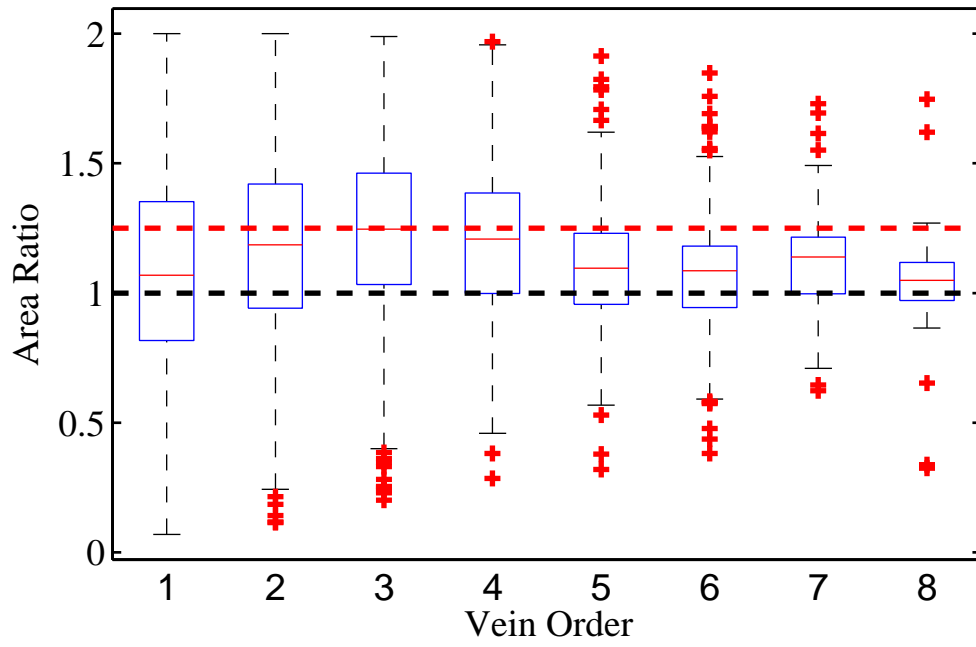

- - - Murrays Law   - - - Elastic Similarity

*Protium trifoliolatum* Engl.

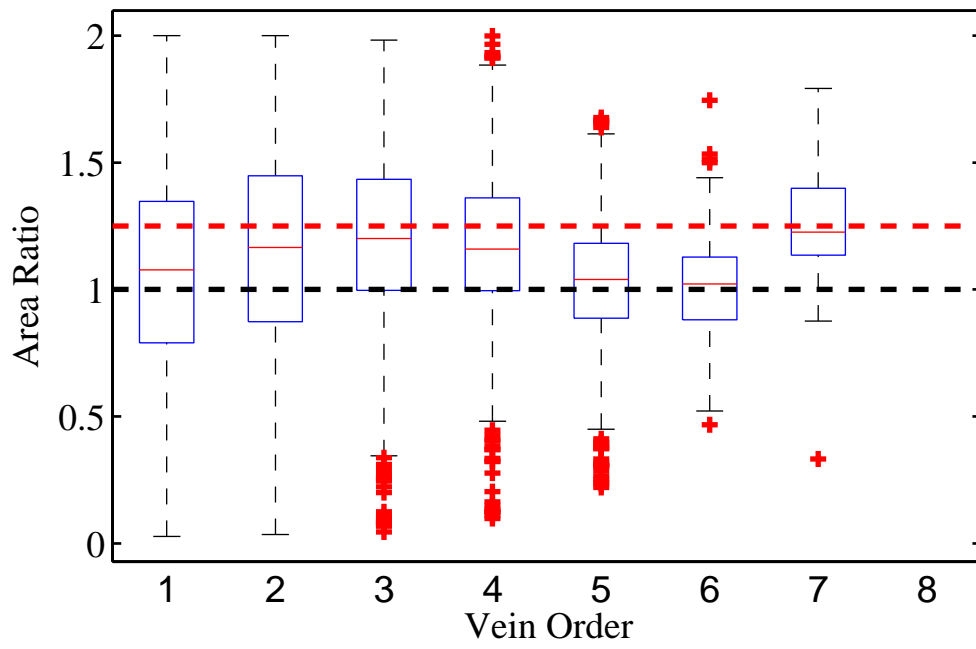

- - - Murrays Law - - - Elastic Similarity

Schizomeria brassii Mattf.

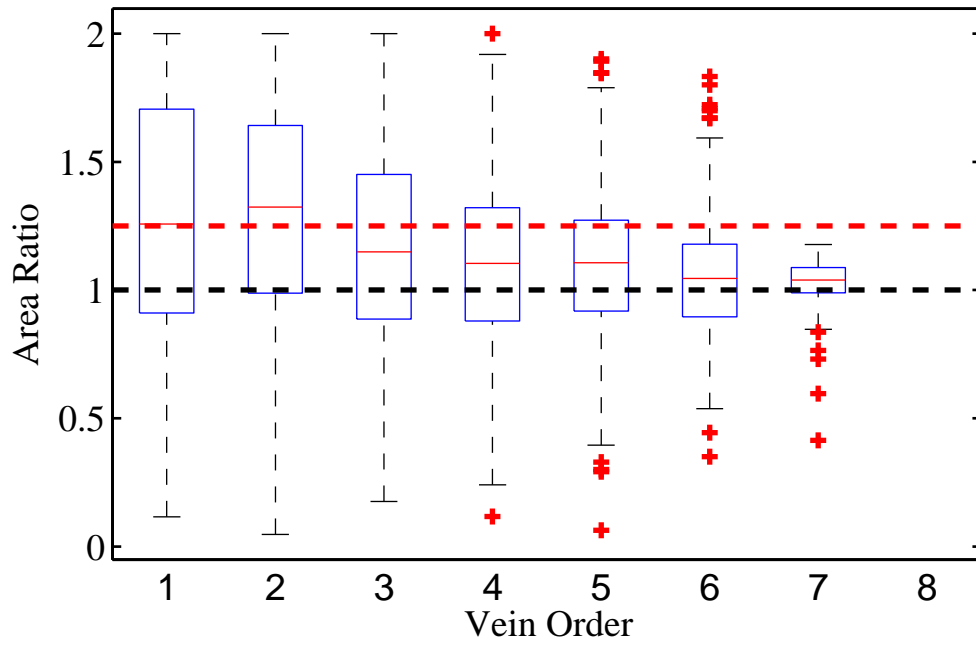

- - - Murrays Law - - - Elastic Similarity

*Vitis wilsoniae* Veitch.

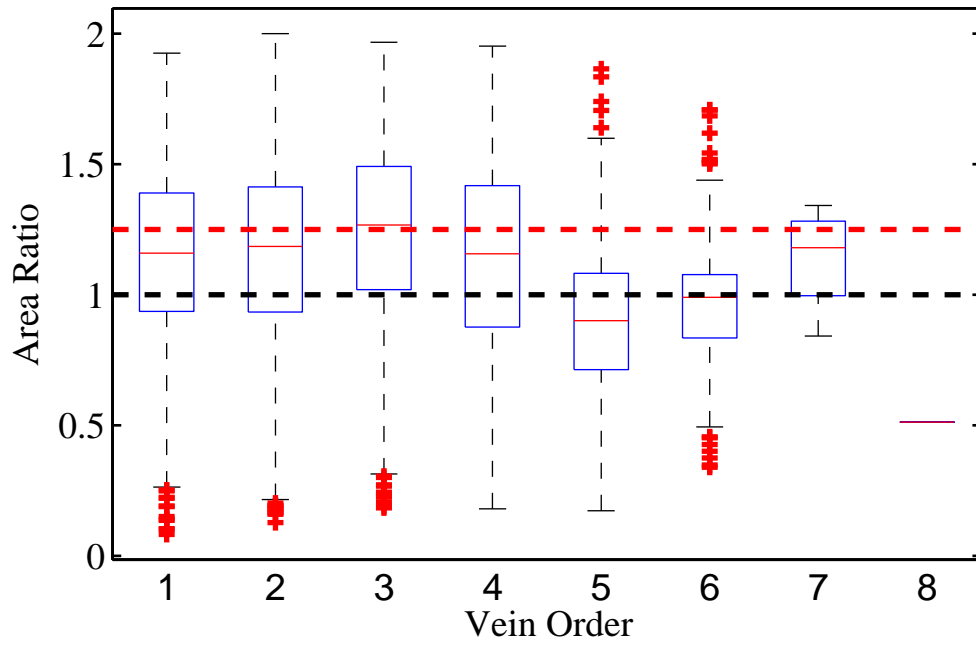

- - - Murrays Law   - - - Elastic Similarity

*Hirtella triandra* Sw.

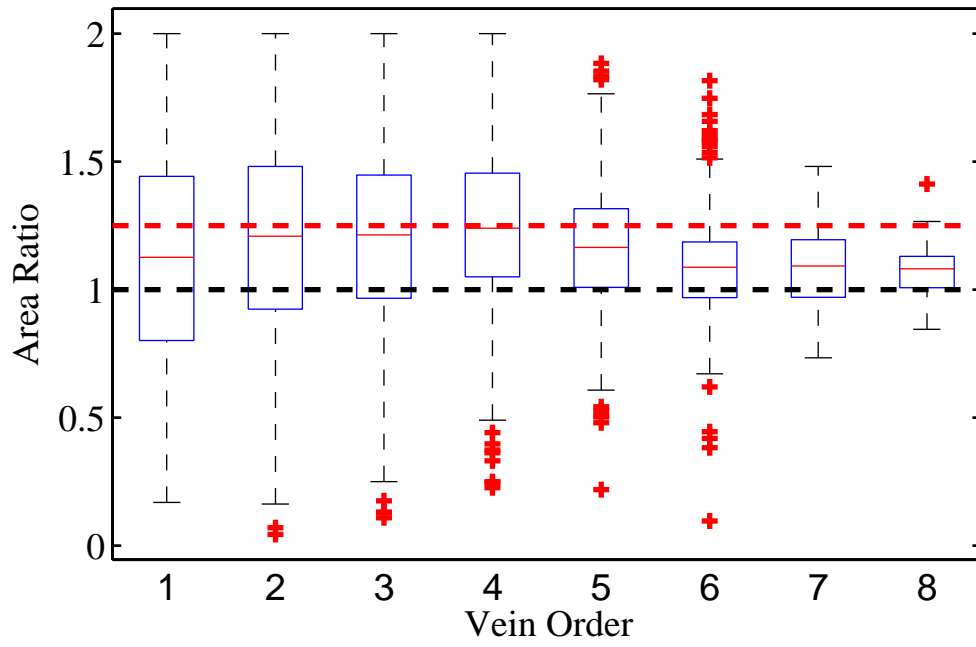

- - - Murrays Law   - - - Elastic Similarity

*Bunchosia cornifolia* Hbk

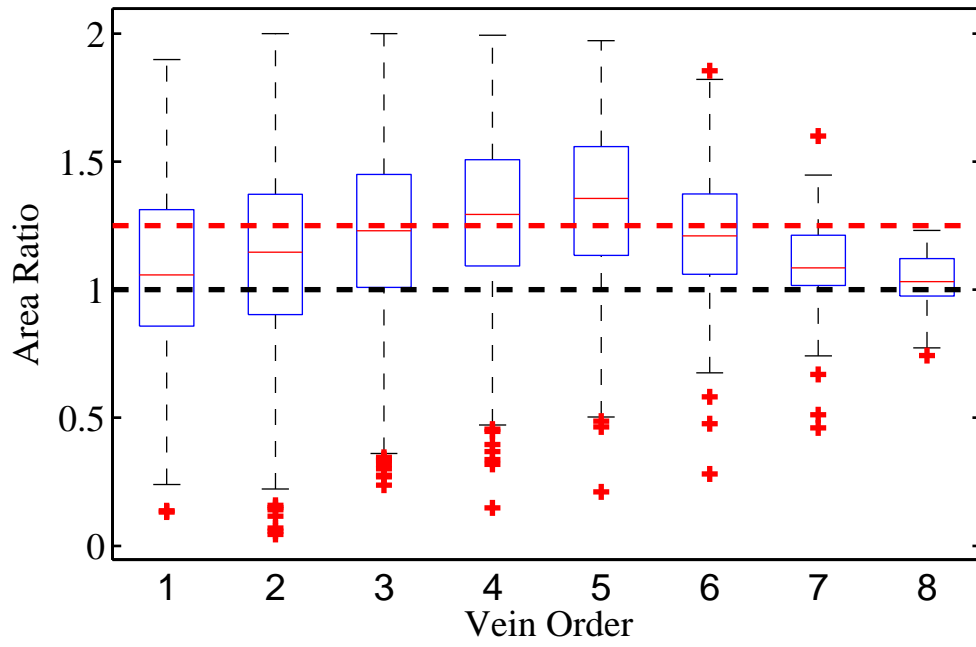

- - - Murrays Law   - - - Elastic Similarity

Bernardinia fluminensis Pl.

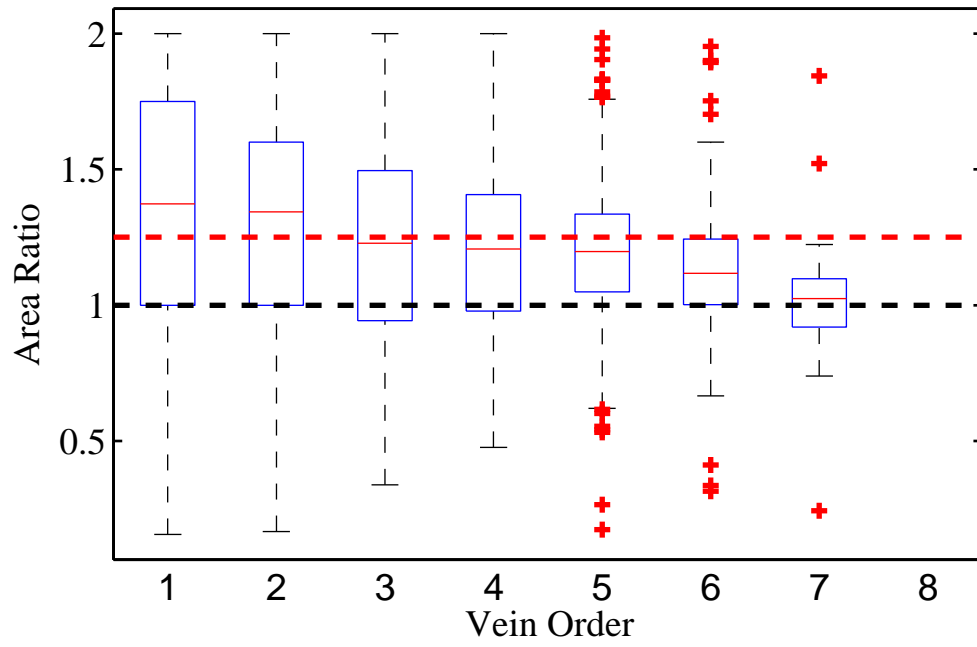

- - - Murrays Law   - - - Elastic Similarity

*Ancistrocladus hamatus* (Vahl) Gilg

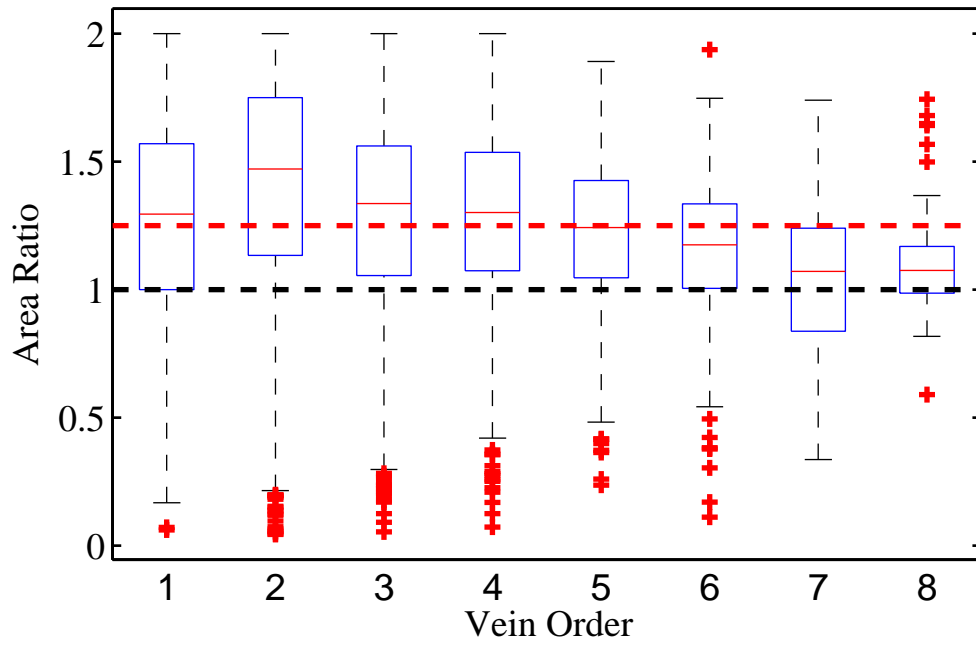



- - - Murrays Law   - - - Elastic Similarity

*Trattinnickia burseraefolia* Mart.

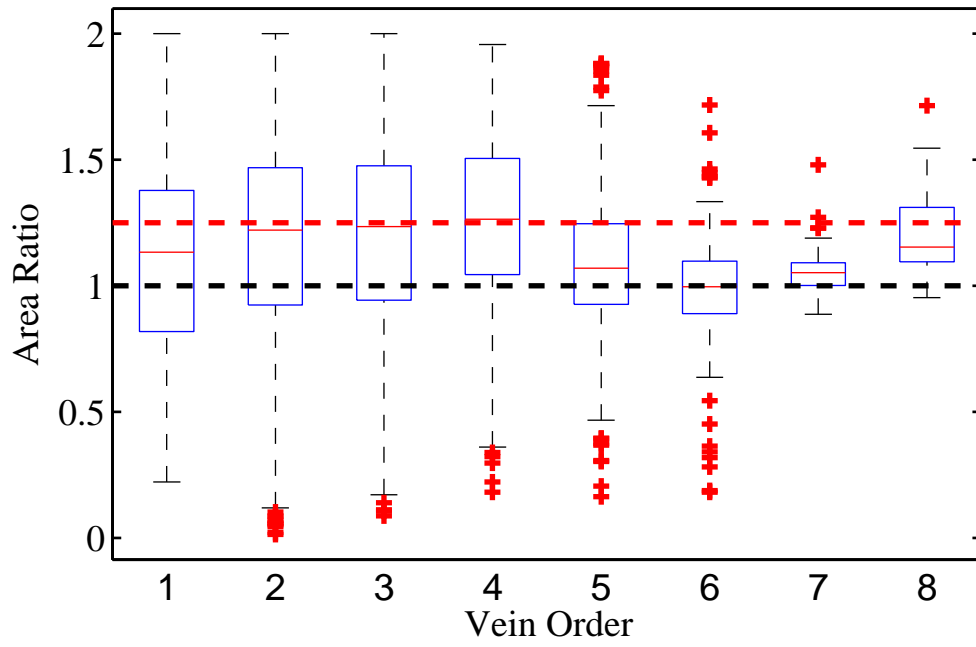

- - - Murrays Law - - - Elastic Similarity

*Parishia rosea*

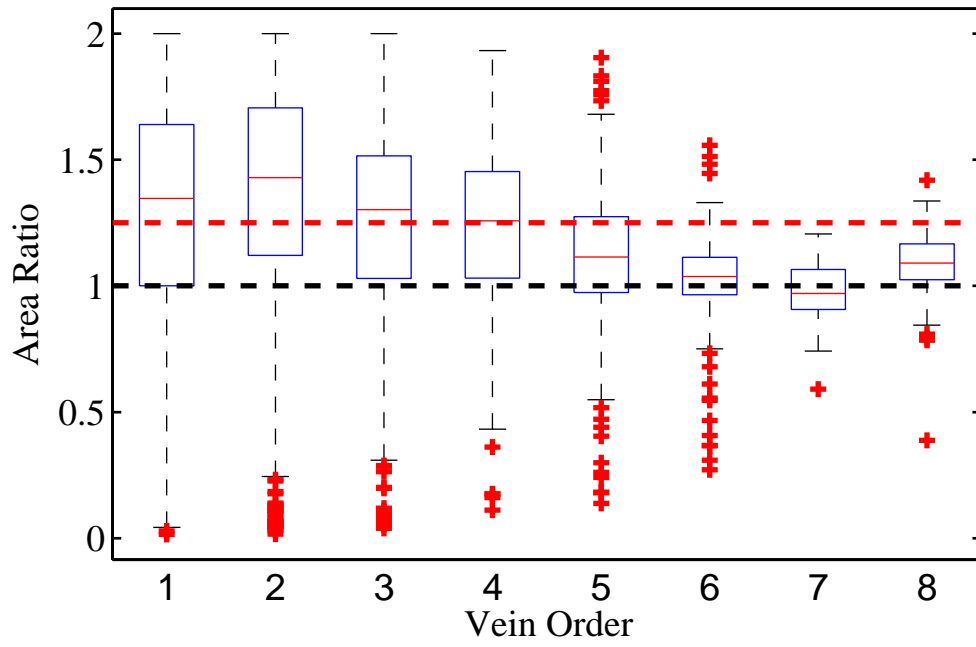

- - - Murrays Law   - - - Elastic Similarity

*Tilia oblongifolia* Batal.

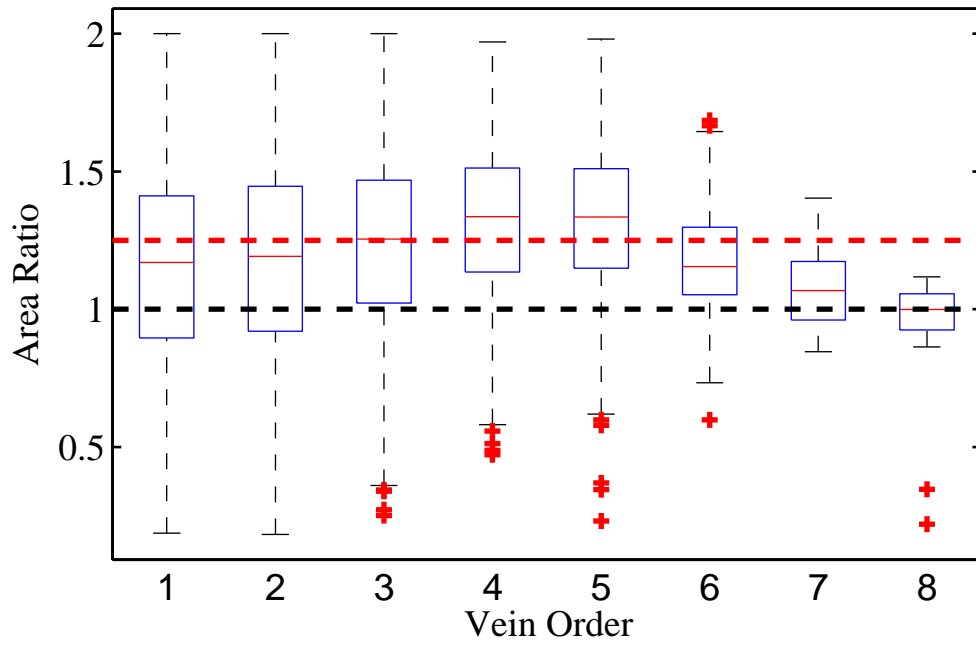

- - - Murrays Law   - - - Elastic Similarity

*Tetrathyrum subcordatum* Benth.

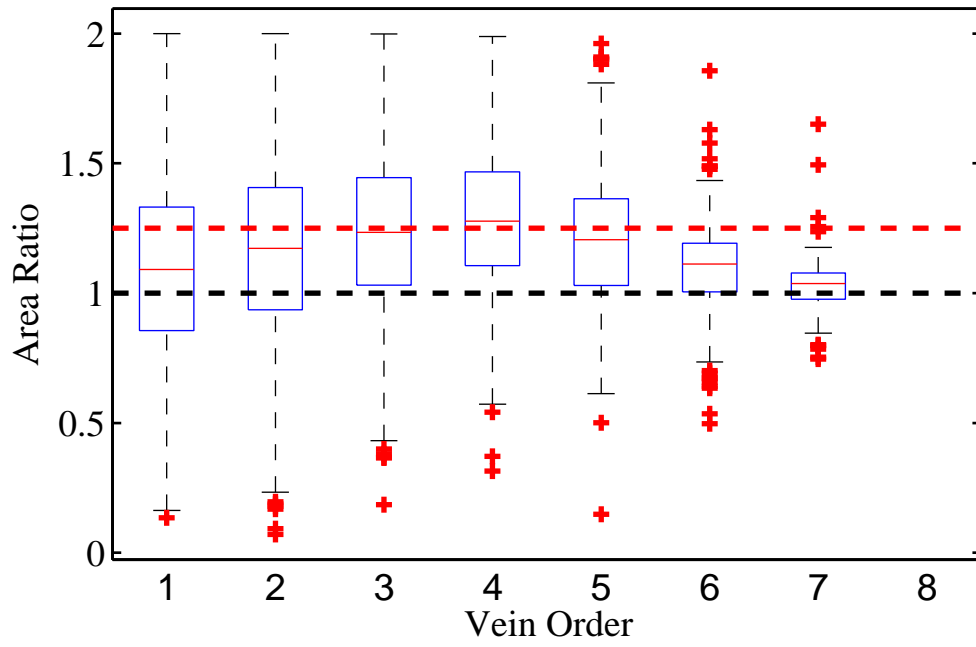

- - - Murrays Law    - - - Elastic Similarity

*Arctostaphylos andersonii* Gray

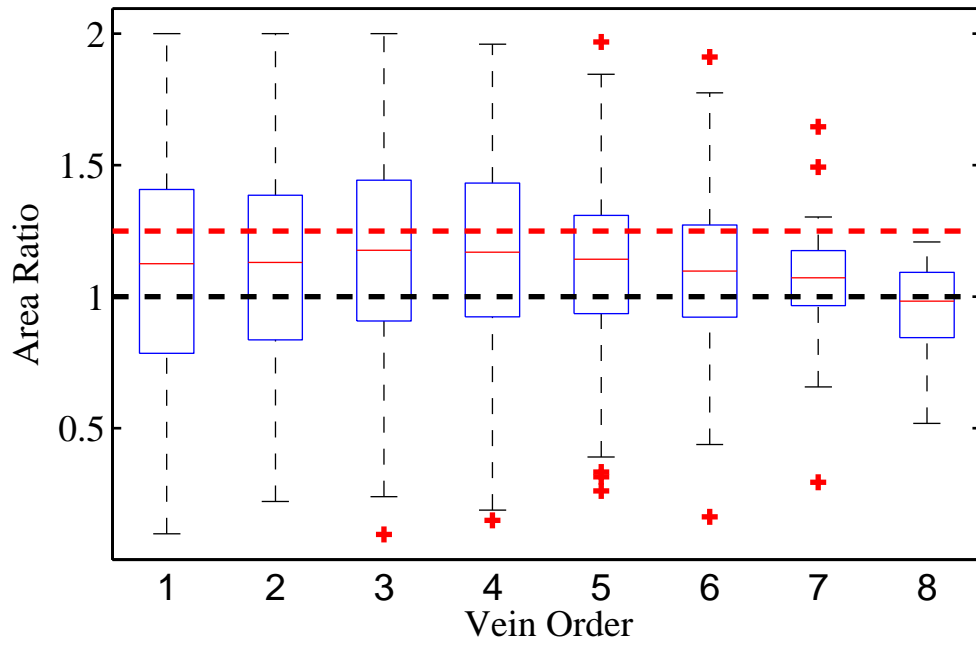

- - - Murrays Law   - - - Elastic Similarity

*Daphnopsis macrophylla* (Hbk) Gilg.

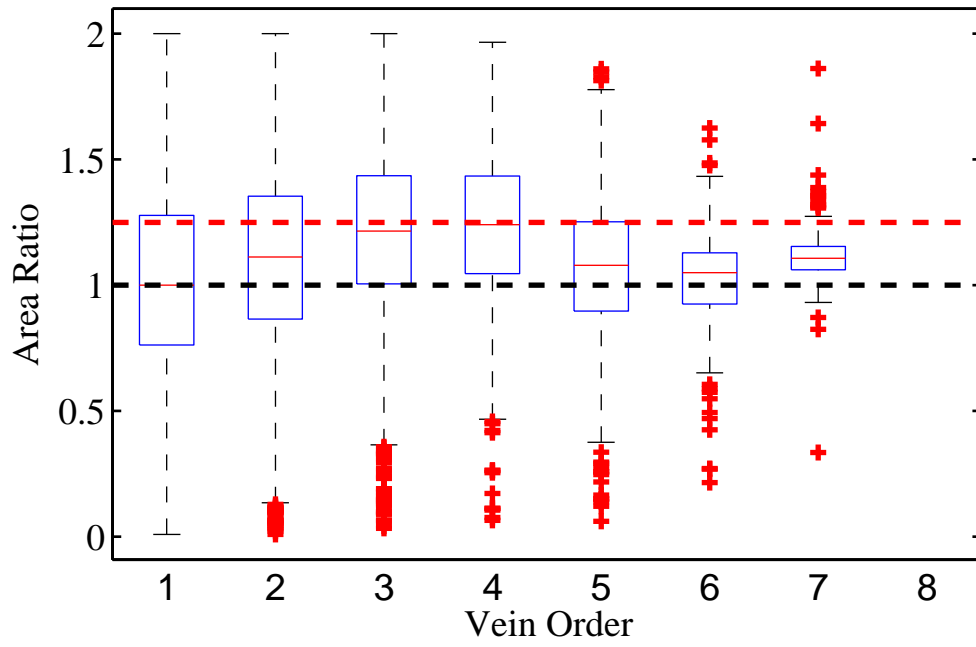

- - - Murrays Law - - - Elastic Similarity

Hydrangea anomala D. Don

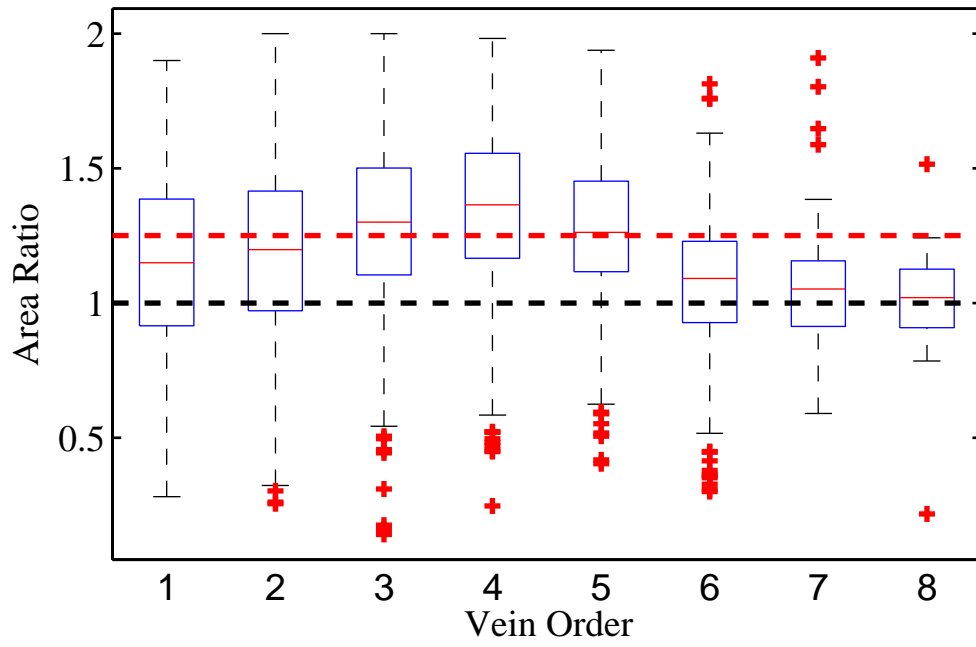

- - - Murrays Law - - - Elastic Similarity

*Hydrangea anomala* D. Don

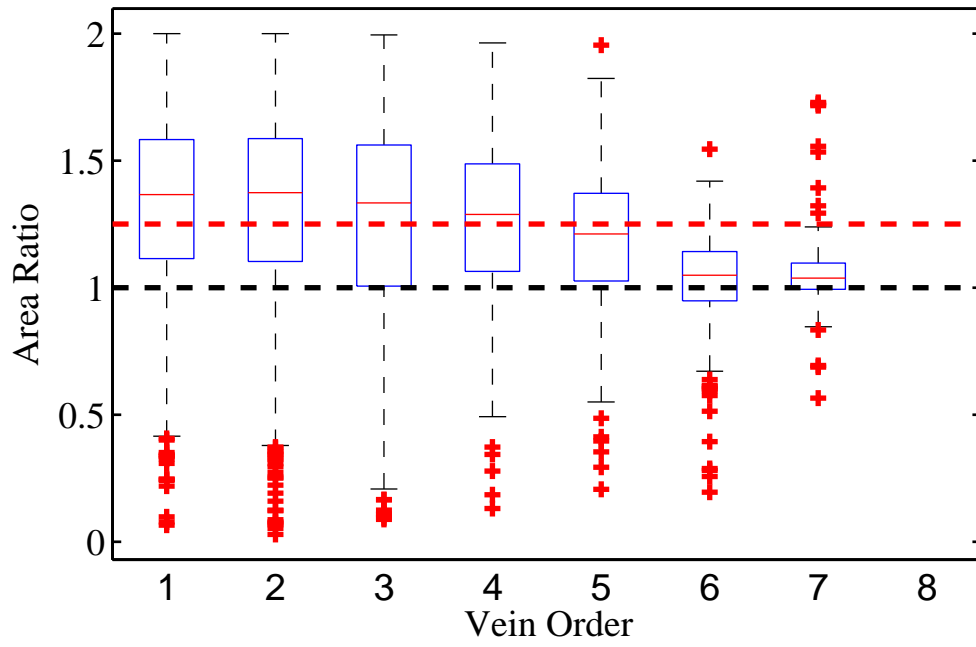



- - - Murrays Law    - - - Elastic Similarity

Belliolum kajewski A.C.Sm.

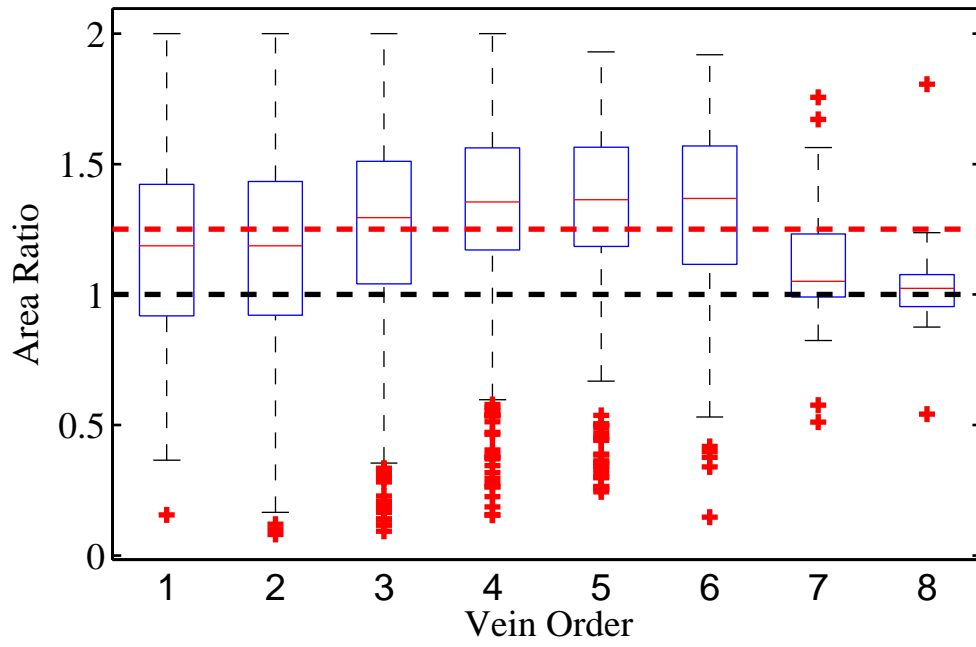

- - - Murrays Law - - - Elastic Similarity

Monodora yangambiensis Boutiq.

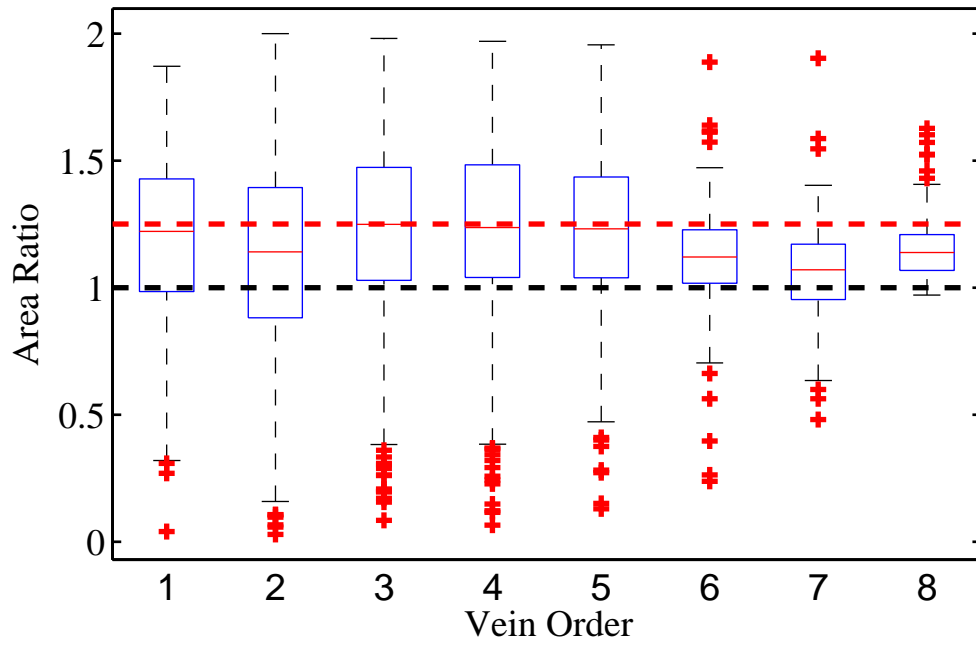

- - - Murrays Law - - - Elastic Similarity

*Alnus obtusata* Makino

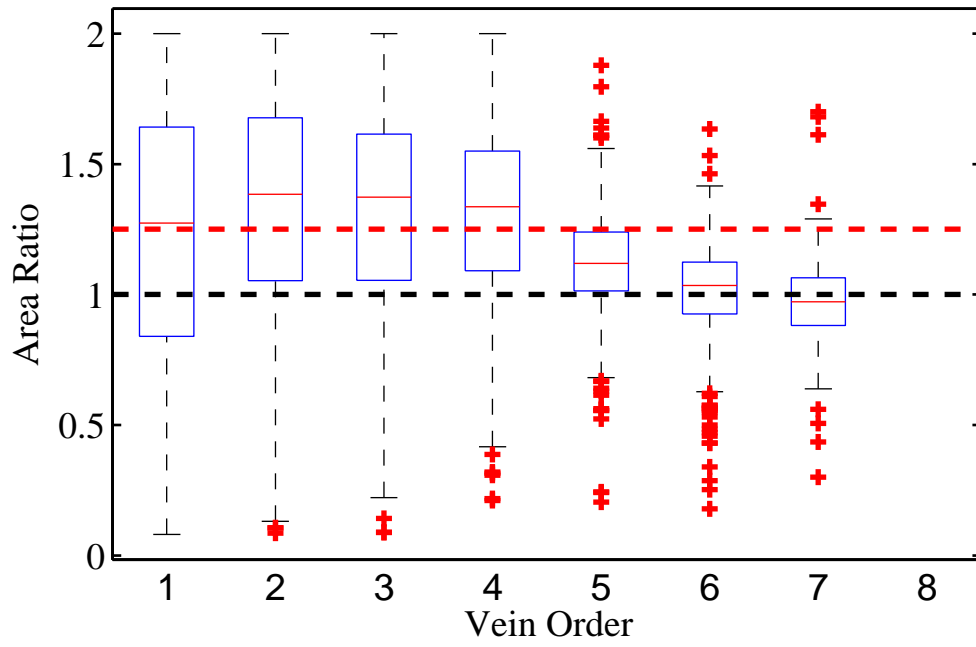

- - - Murrays Law   - - - Elastic Similarity

*Schizophragma integrifolia* Oliv.

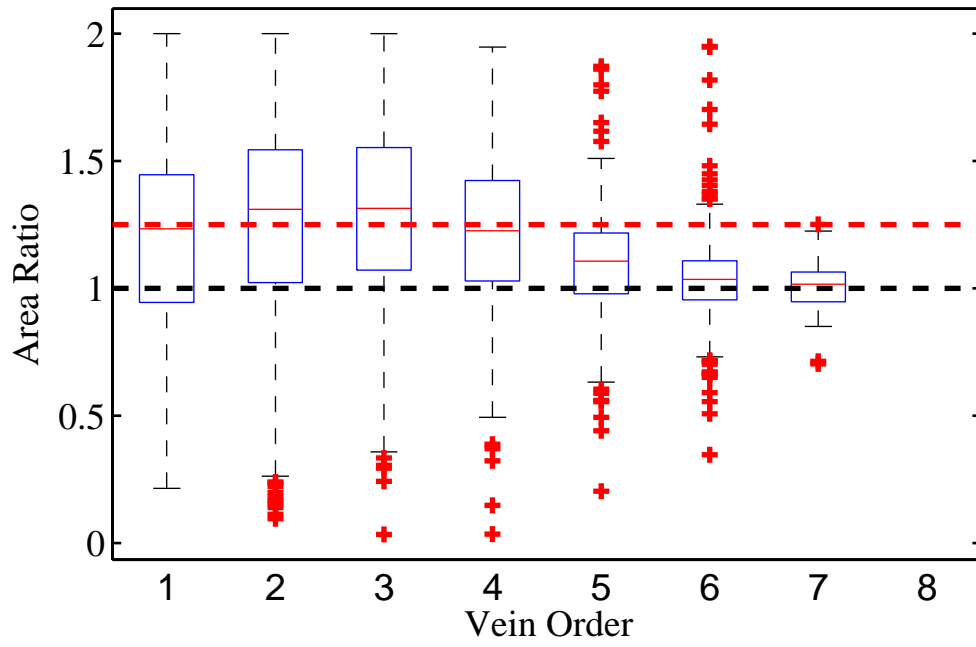

- - - Murrays Law   - - - Elastic Similarity

Systemonodaphne mezii Kost.

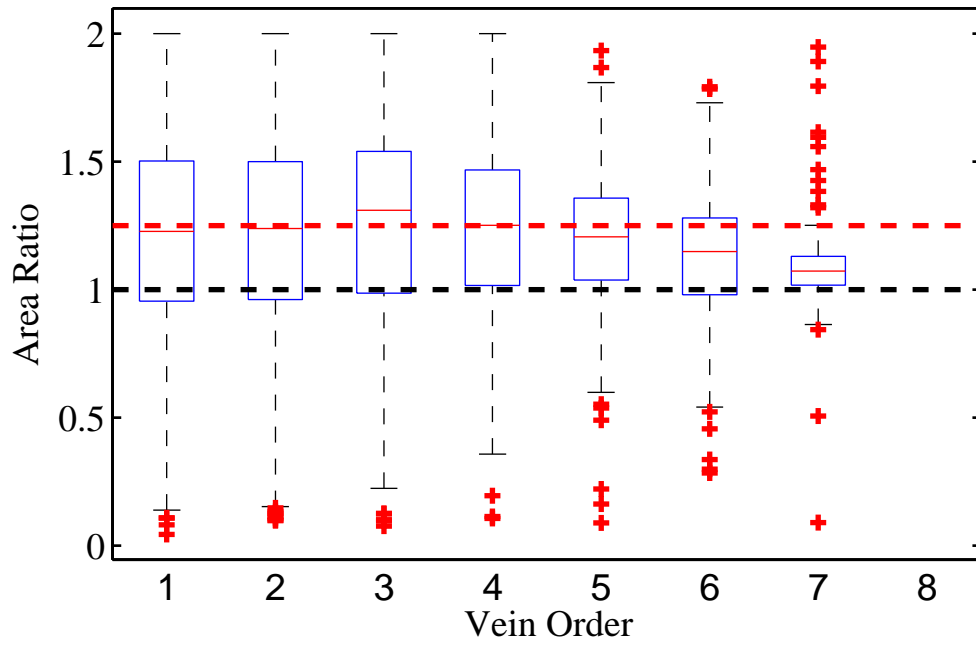

- - - Murrays Law - - - Elastic Similarity

*Gonypetalum acereanum* Ule.

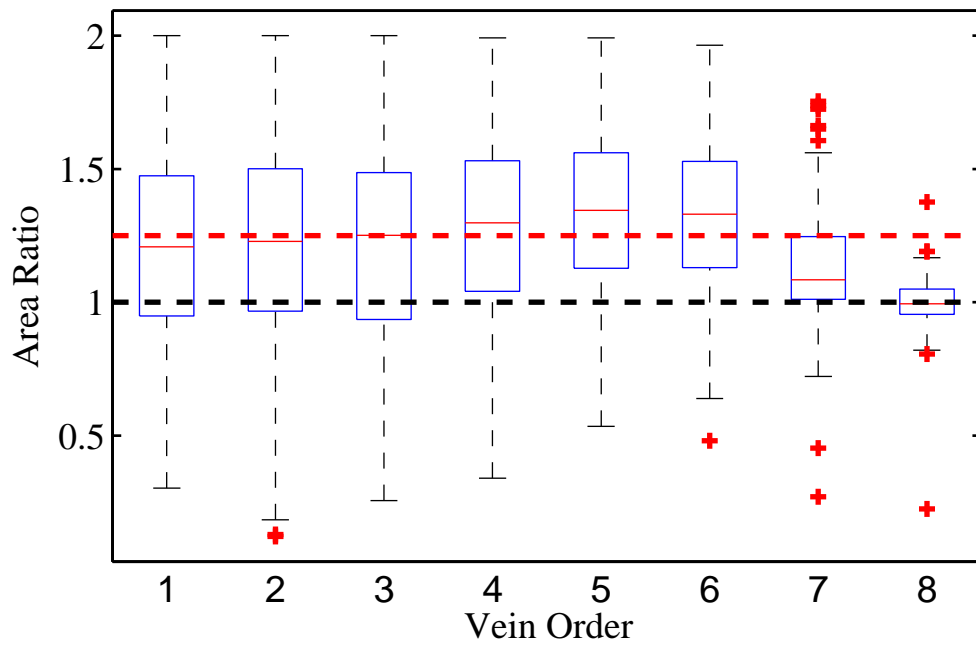

- - - Murrays Law - - - Elastic Similarity

*Peixotoa glabra* Juss.

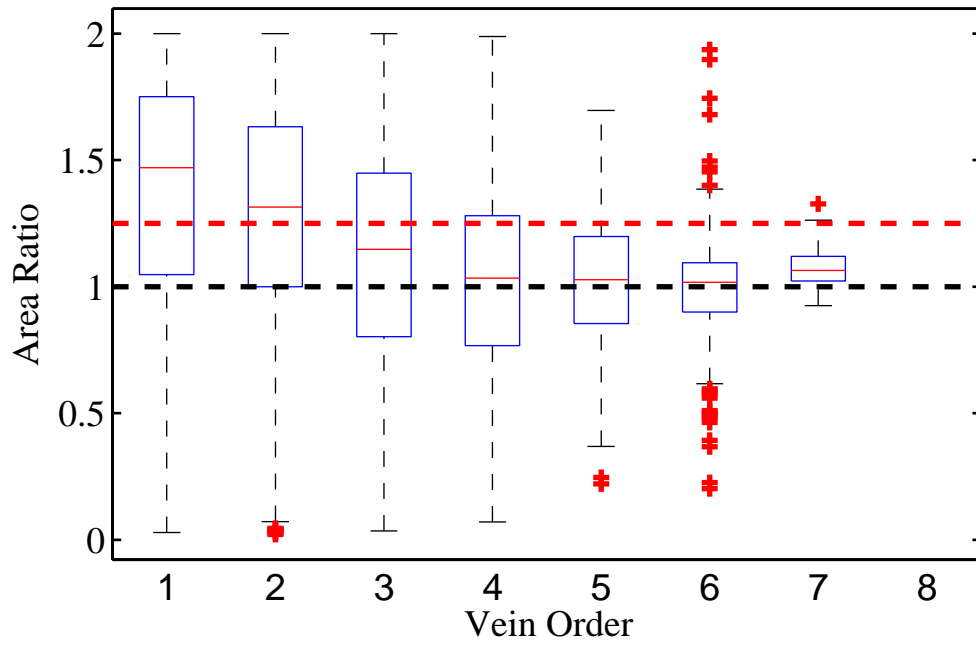

- - - Murrays Law - - - Elastic Similarity

*Coelostegia griffithii* Benth.

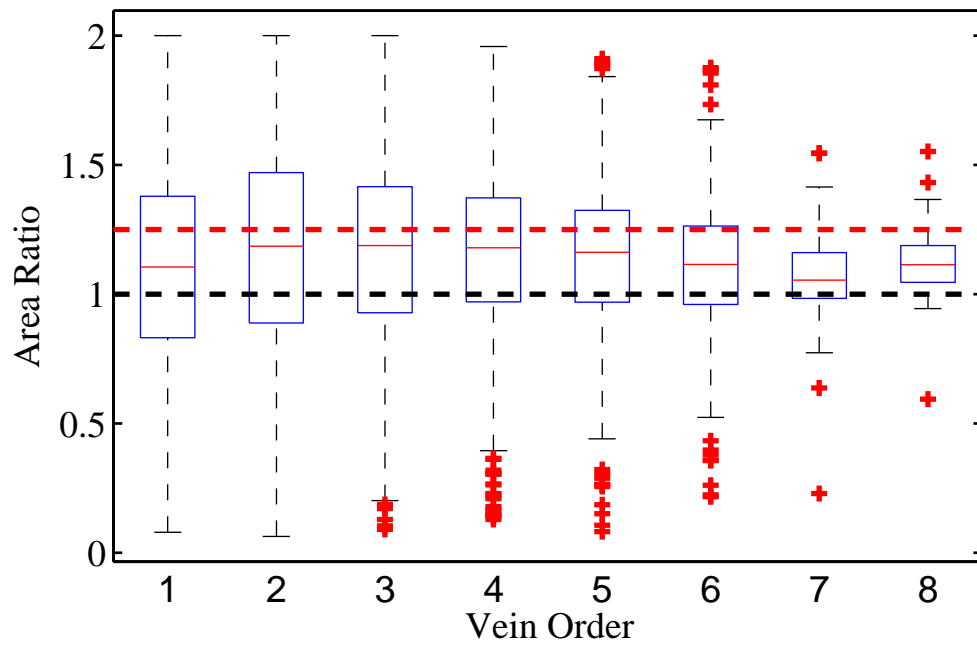



- - - Murrays Law - - - Elastic Similarity

*Teijsmanniodendron coriaceum* (C.B. Clarke) Kosterm.

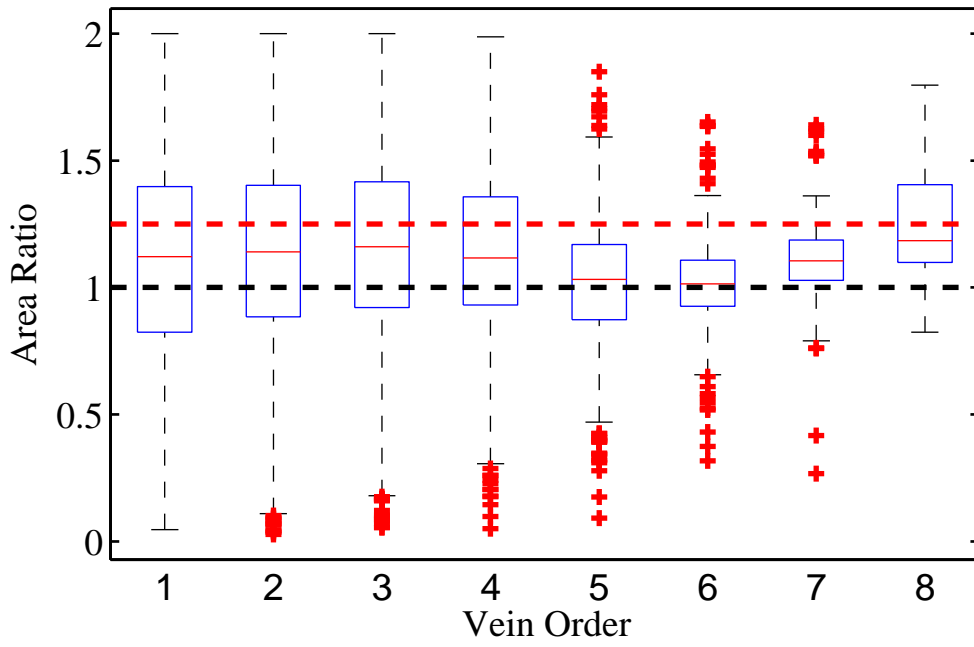

- - - Murrays Law - - - Elastic Similarity

Acer morrisonense

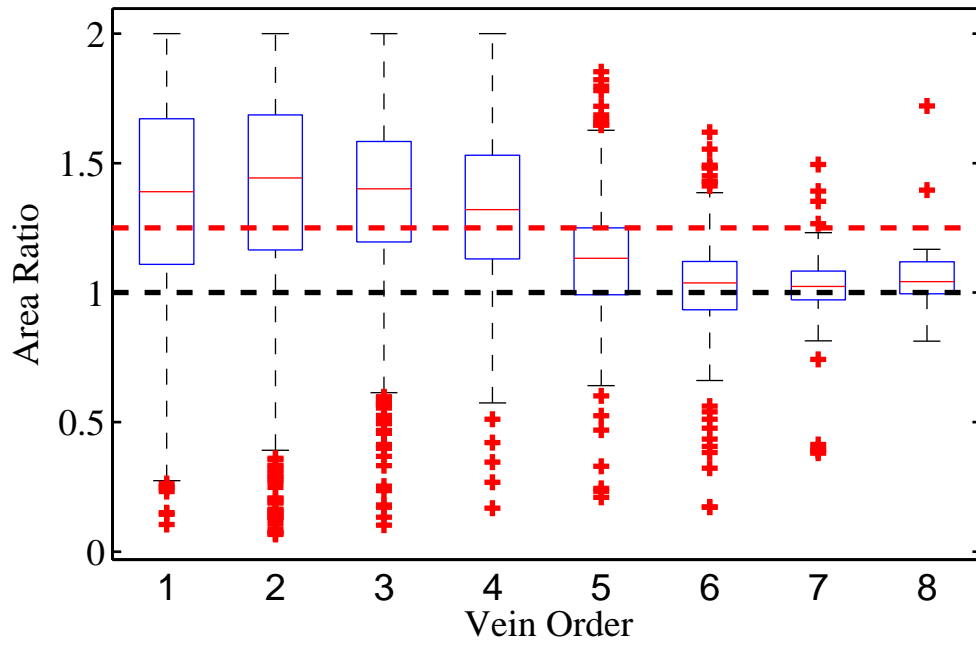

- - - Murrays Law - - - Elastic Similarity

*Klainedoxa lancifolia* Harms

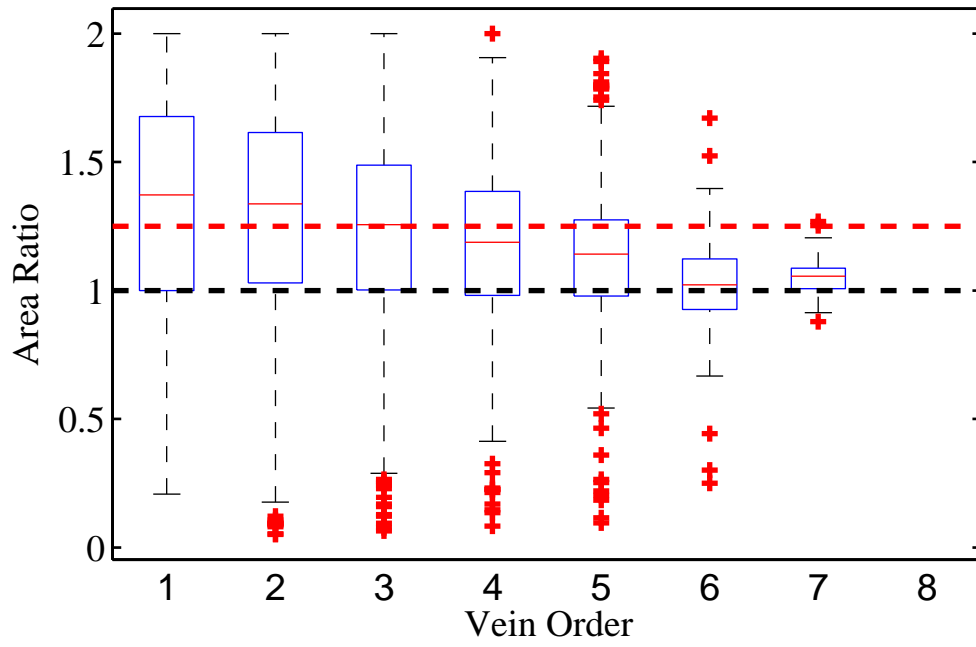

- - - Murrays Law   - - - Elastic Similarity

*Rinorea elliotii* Engl.

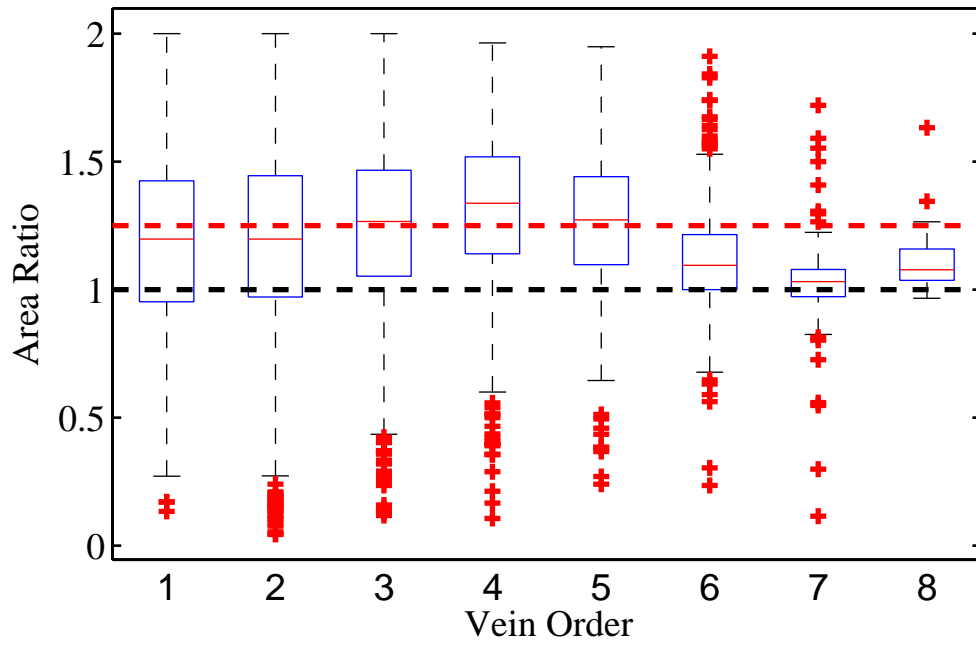

- - - Murrays Law - - - Elastic Similarity

*Rhaphiostylis preussii* Engl.

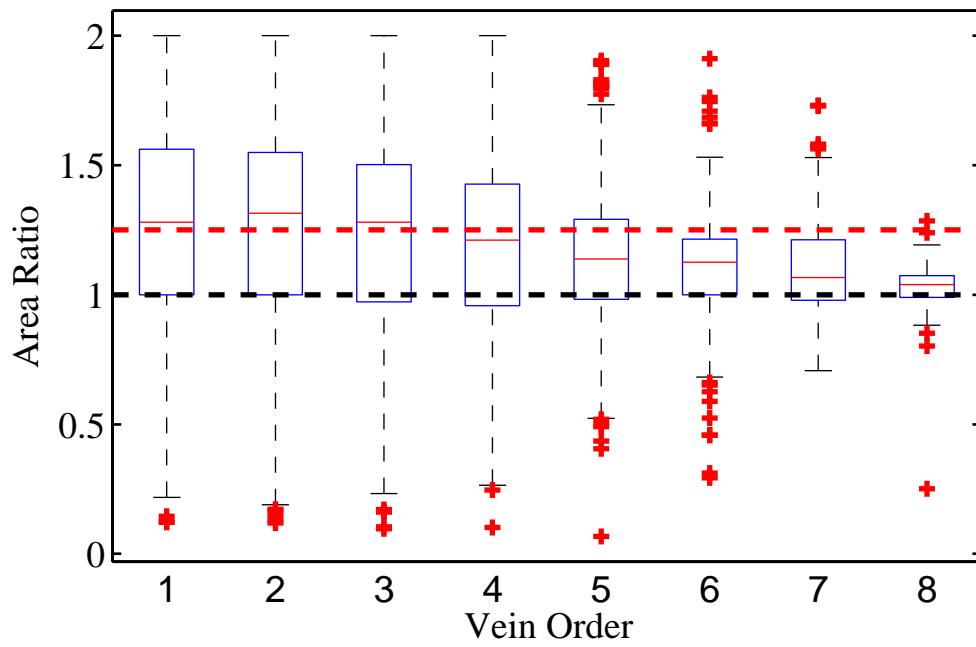

- - - Murrays Law - - - Elastic Similarity

Mayna echinata Spruce

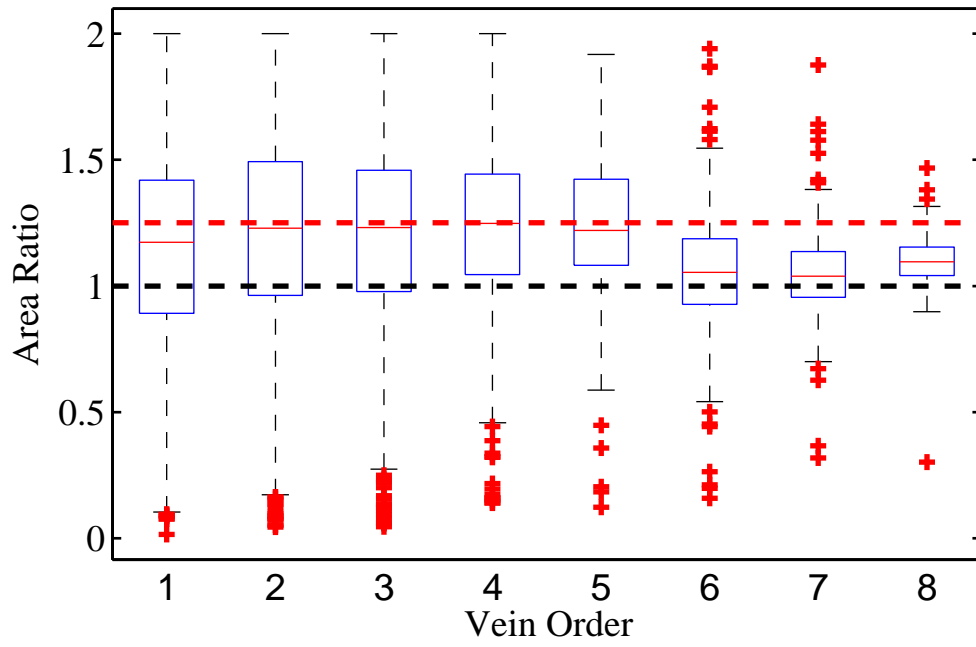

- - - Murrays Law   - - - Elastic Similarity

*Deeringothamnus pulchellus* Small

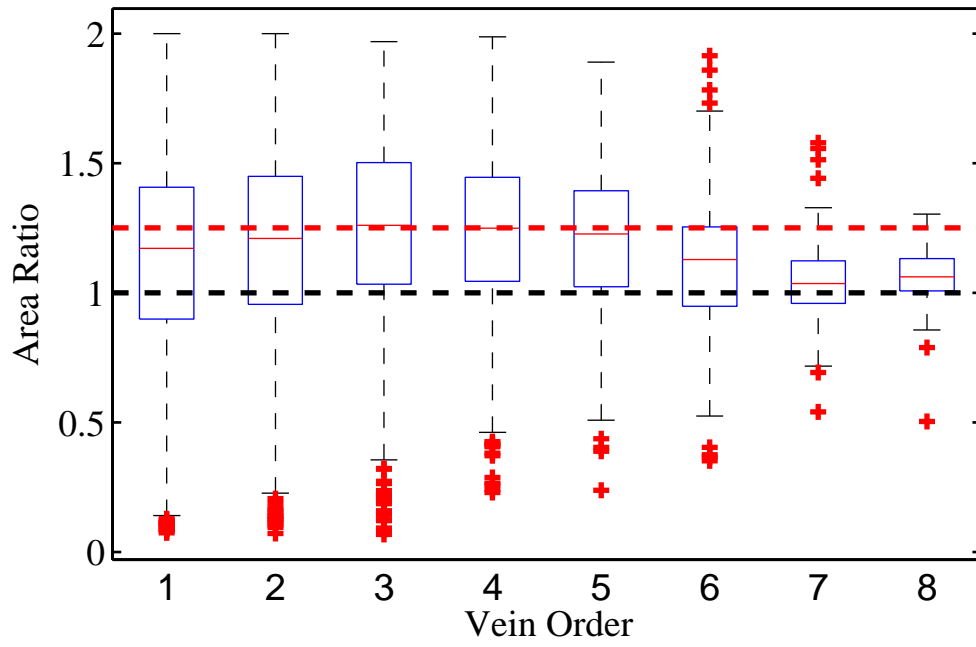

- - - Murrays Law    - - - Elastic Similarity

*Castanopsis chrysophylla* (Dougl.) Hjelmq. var. *minor* (Benth.) Dc

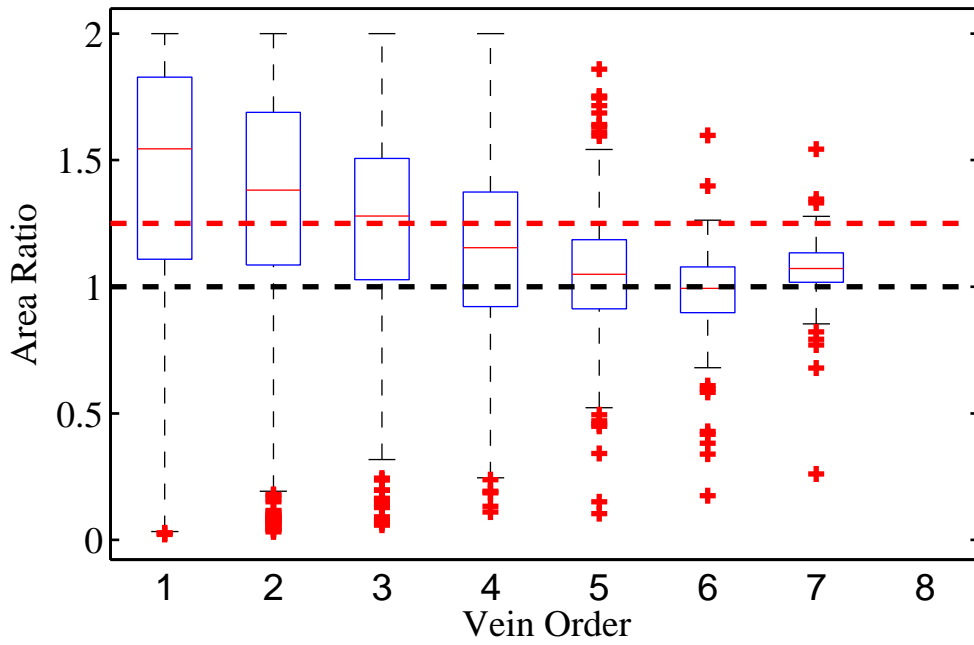



- - - Murrays Law    - - - Elastic Similarity

Condylocarpon amazonica Mgf.

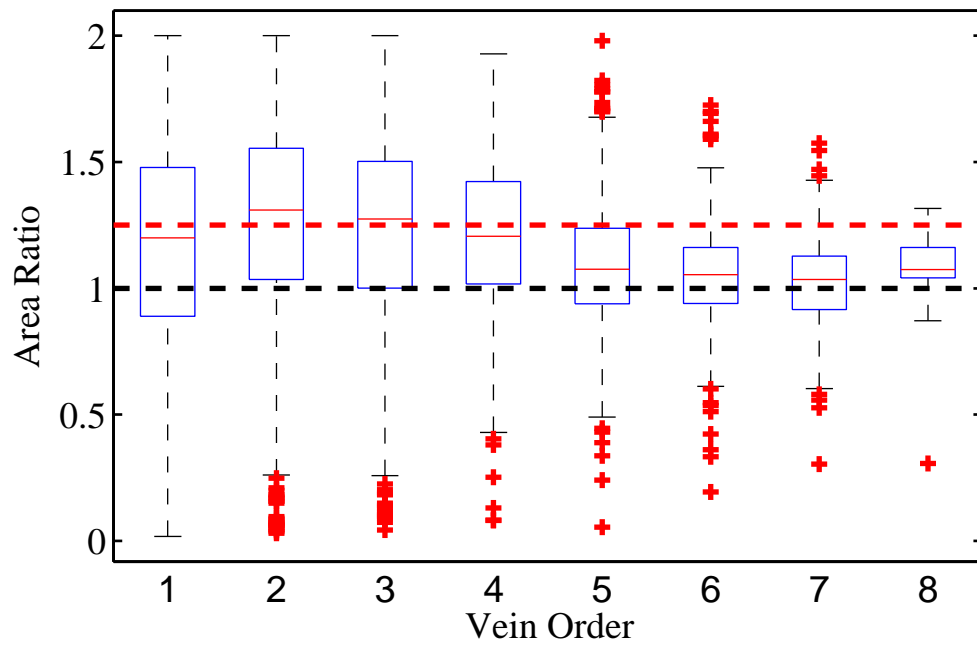

- - - Murrays Law   - - - Elastic Similarity

*Kielmeyera variabilis* Mart.

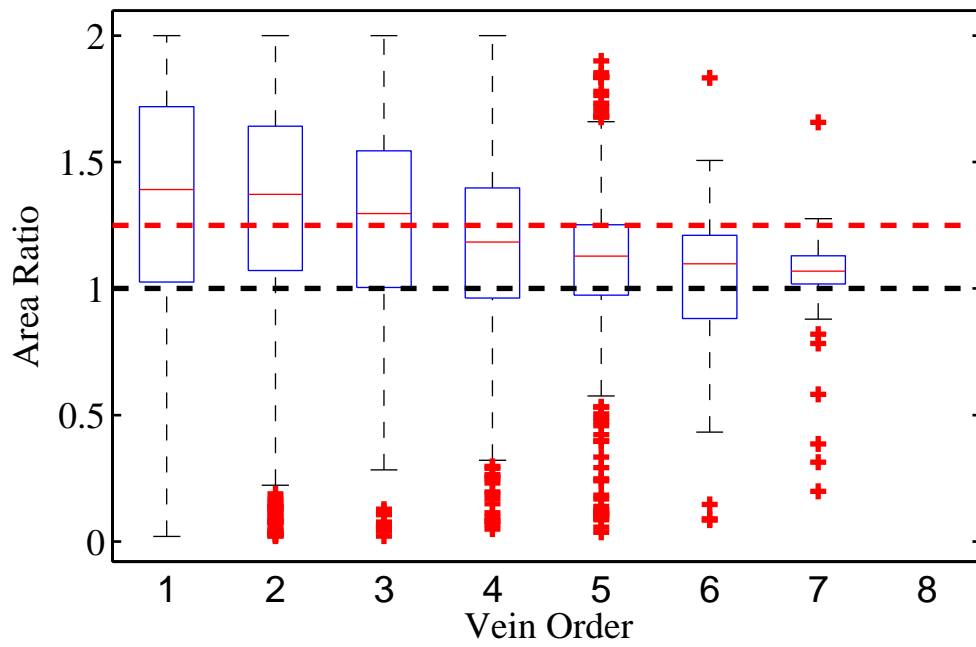

- - - Murrays Law - - - Elastic Similarity

*Betula lutea*

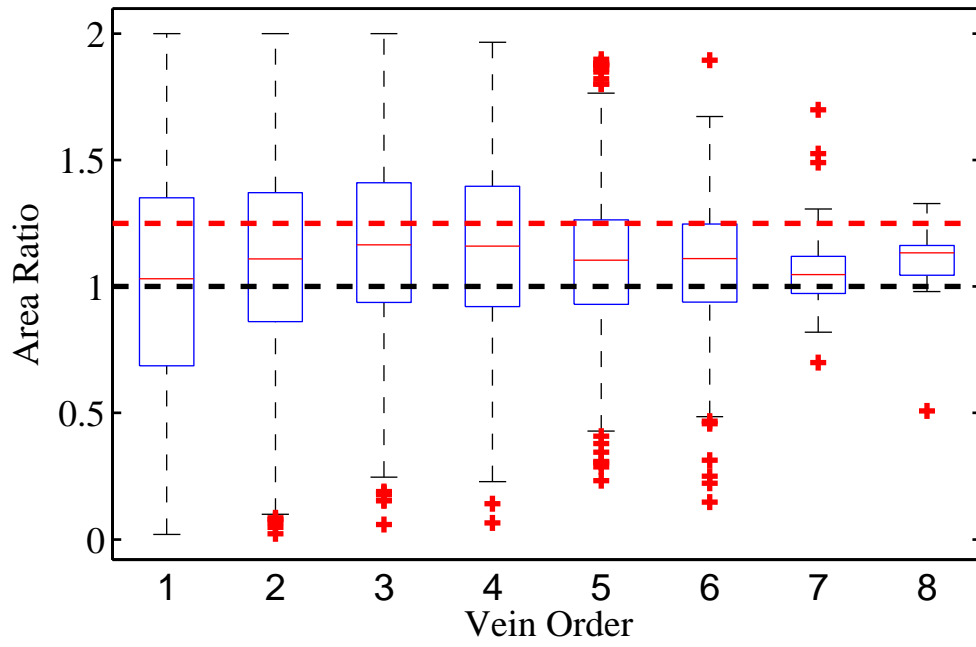

- - - Murrays Law   - - - Elastic Similarity

*Meliosma parvifolia*

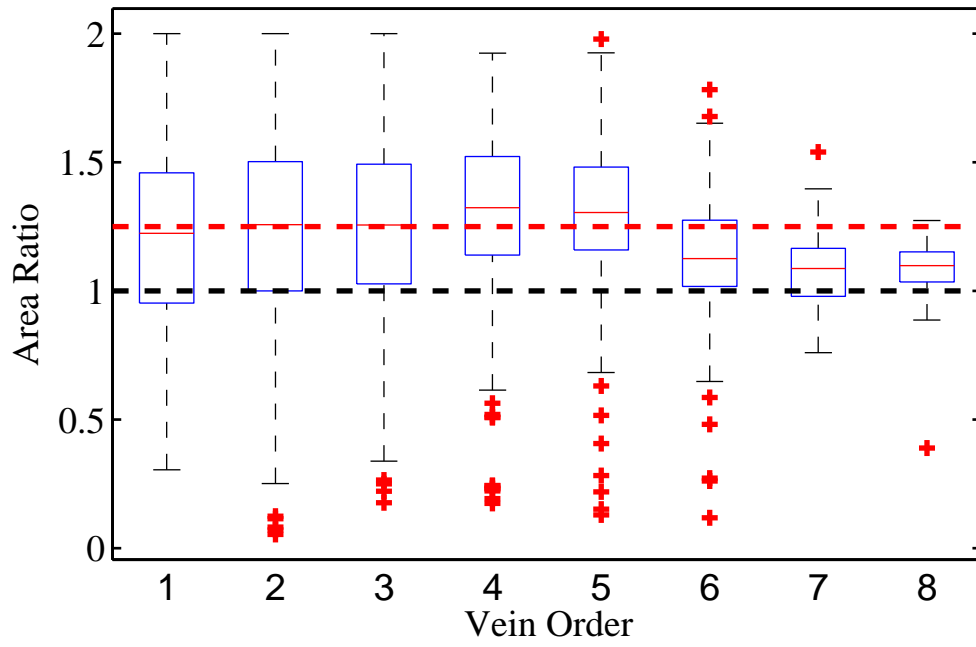

- - - Murrays Law - - - Elastic Similarity

Quercus chasei Mc Minn Et Al.

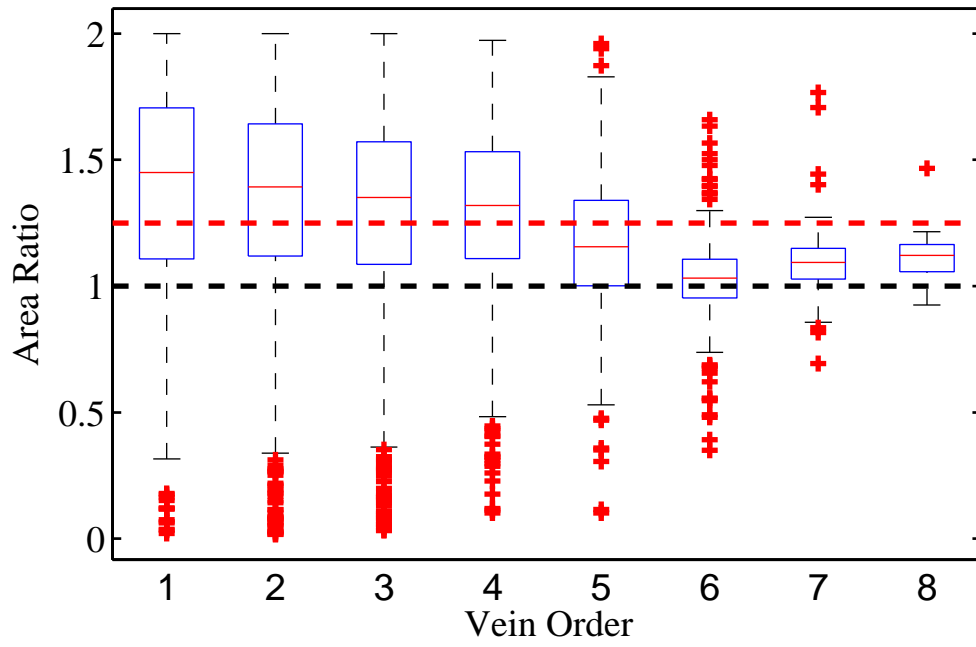

- - - Murrays Law - - - Elastic Similarity

*Quercus catesbaei* Michx.

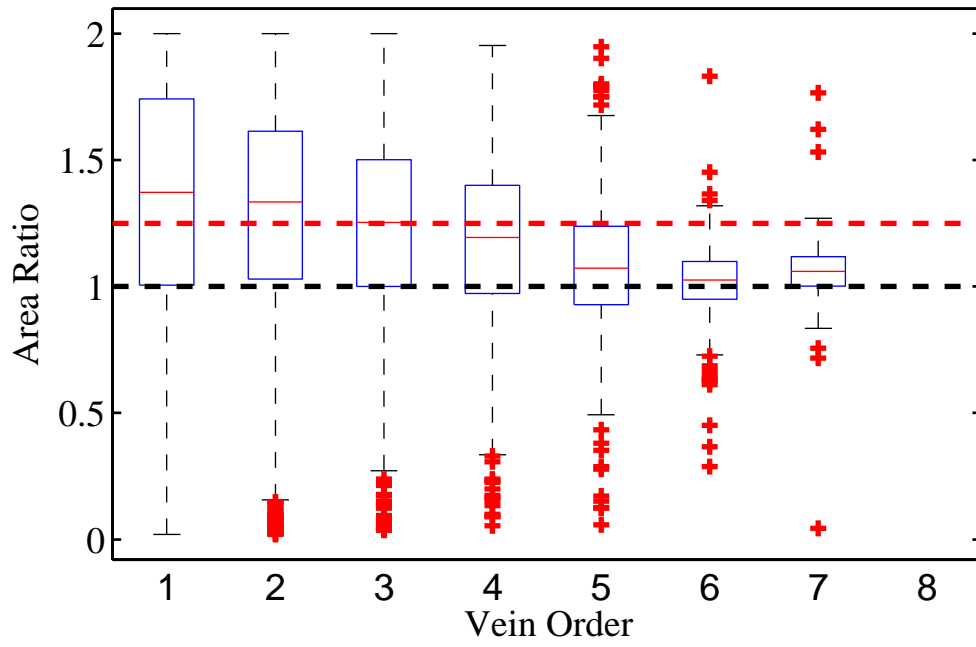

- - - Murrays Law   - - - Elastic Similarity

Acer leucoderme Small

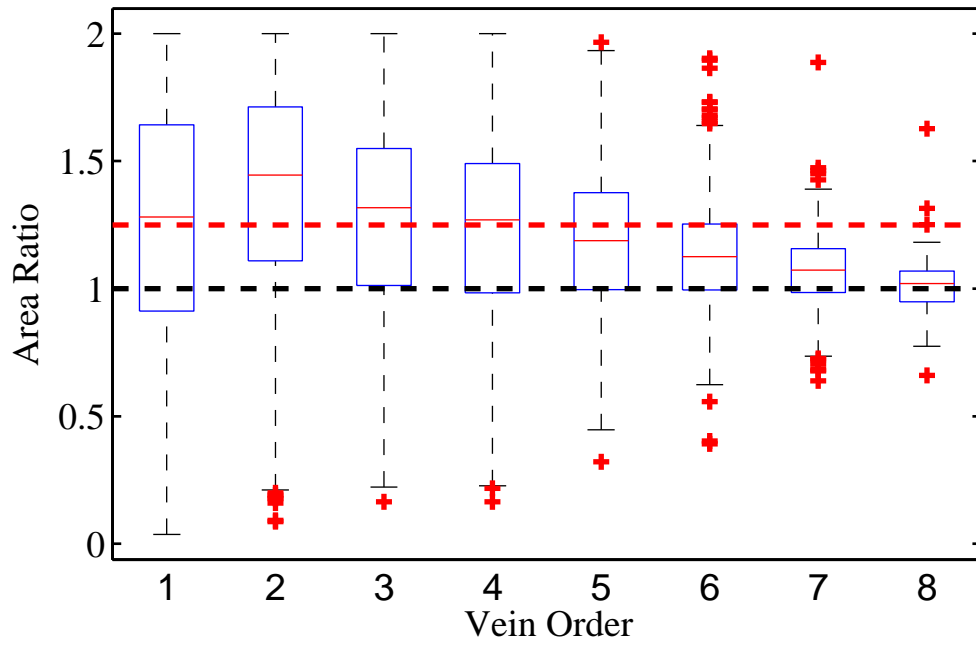

- - - Murrays Law - - - Elastic Similarity

*Diospyros hebecarpa* Cunn.

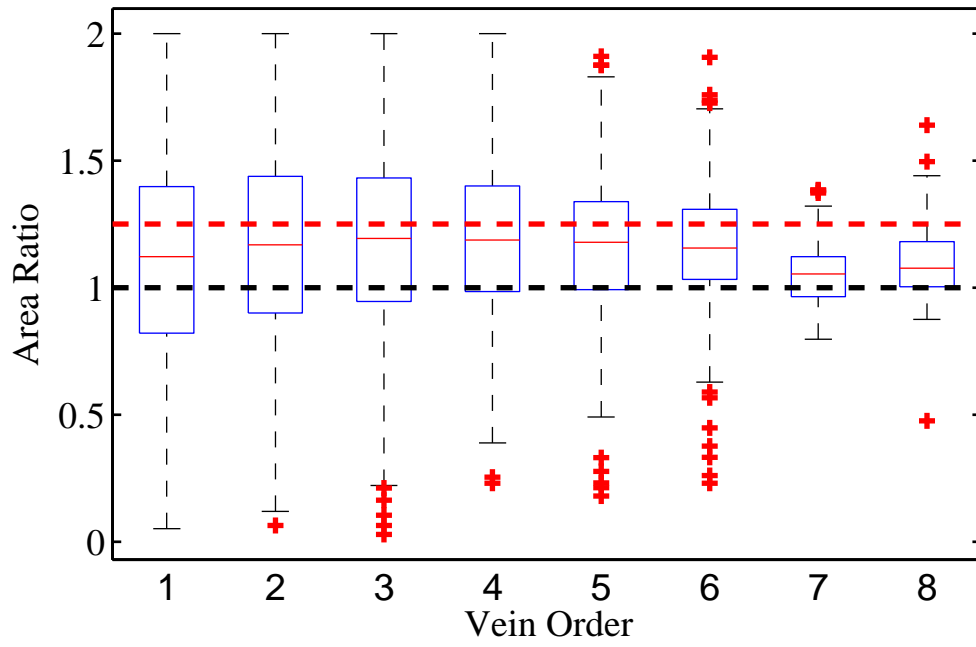



- - - Murrays Law - - - Elastic Similarity

Gluta elegans Kurz.

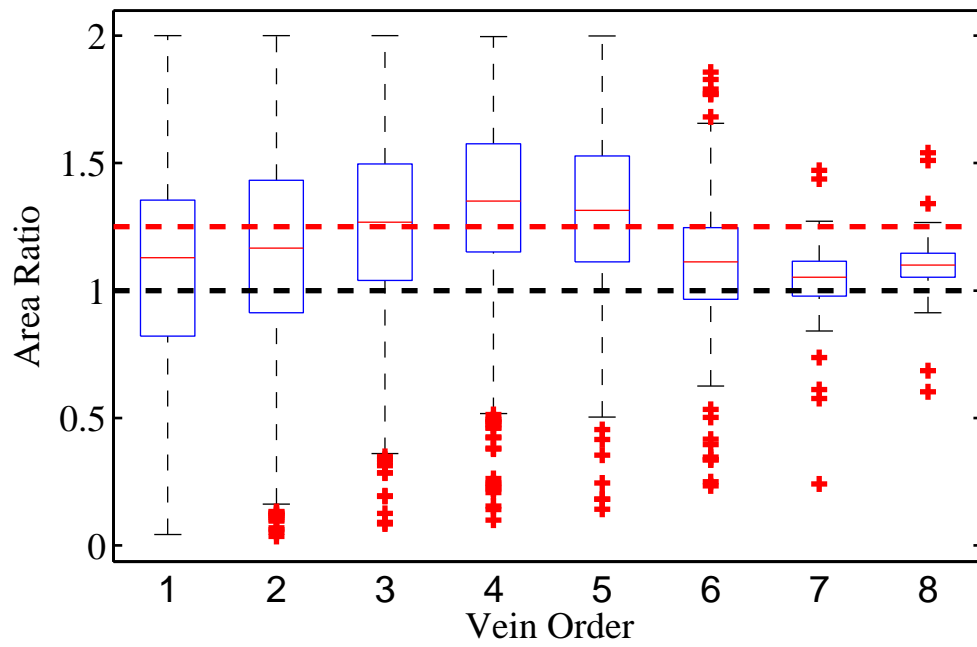

- - - Murrays Law   - - - Elastic Similarity

*Artabotrys likimensis* De Wild.

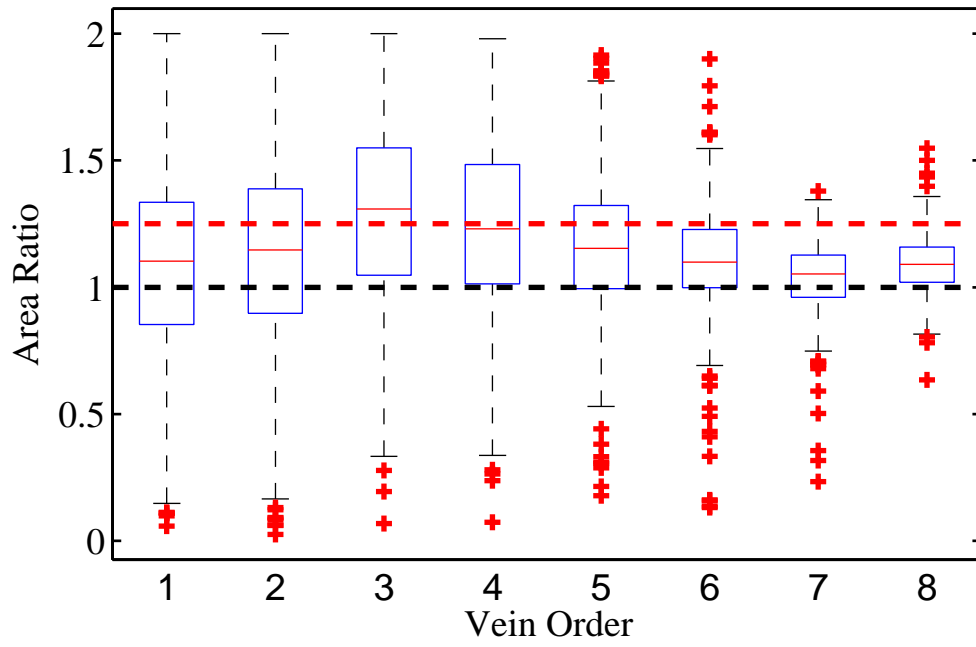

- - - Murrays Law   - - - Elastic Similarity

*Rockinghamia angustifolia* (Benth.) Airy Shaw

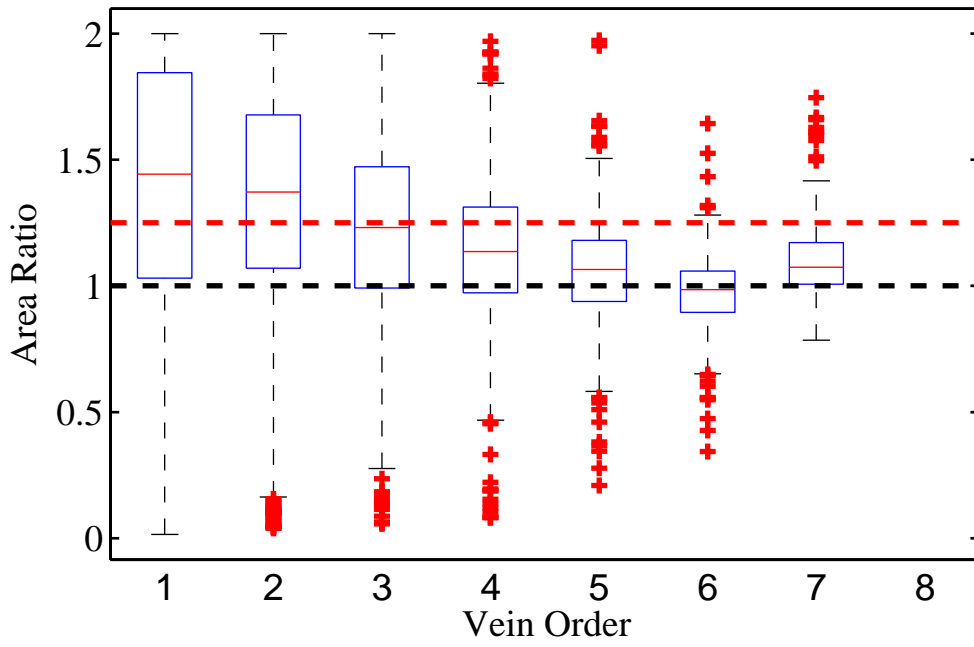

- - - Murrays Law   - - - Elastic Similarity

*Engelhardia roxburghiana*

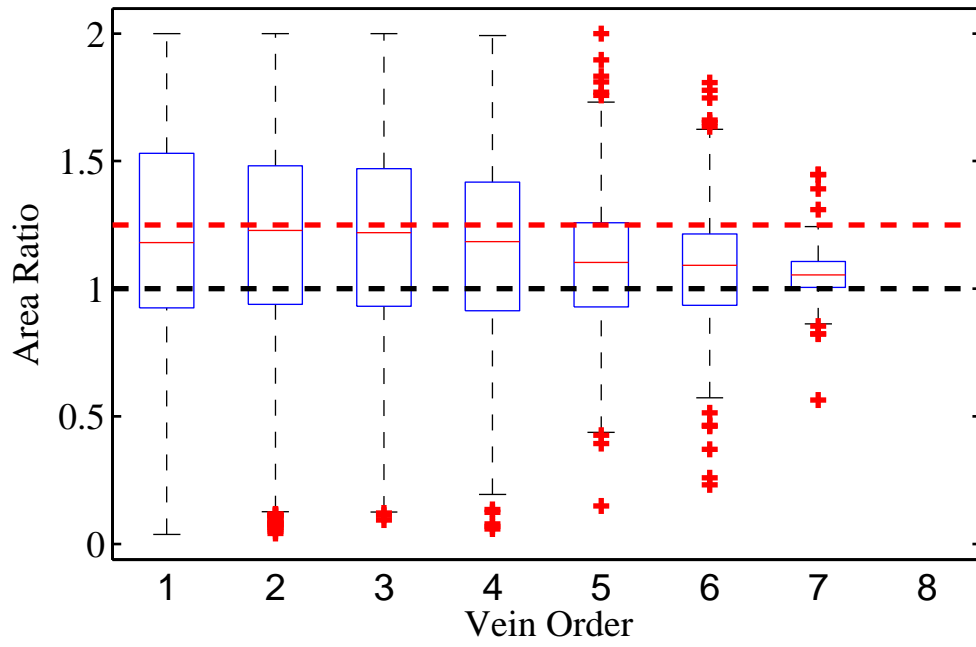

- - - Murrays Law   - - - Elastic Similarity

Rhododendron earneum

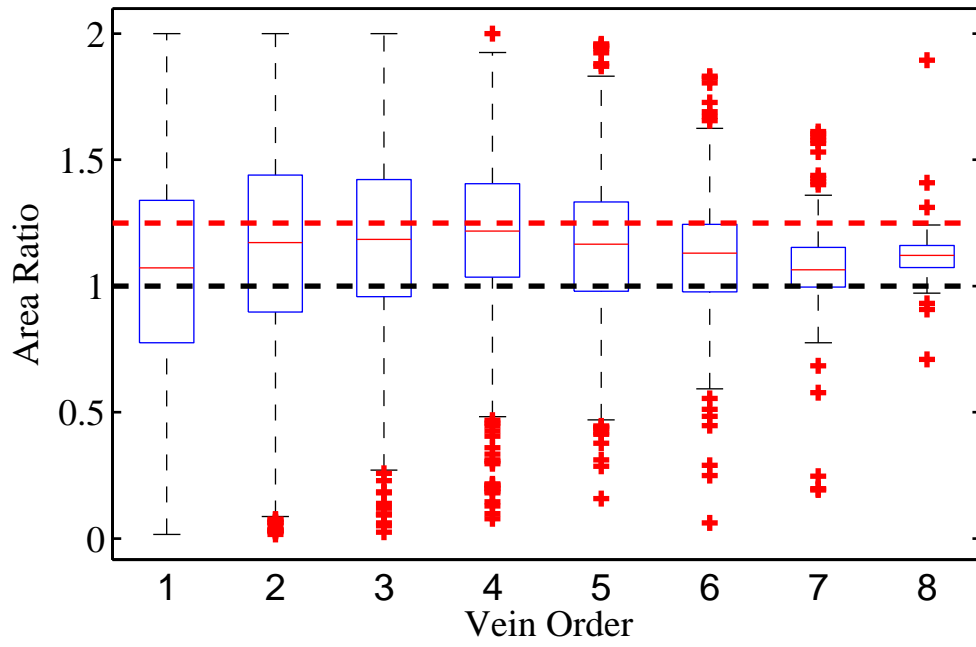

- - - Murrays Law - - - Elastic Similarity

*Clonodia racemosa* (Juss.) Ndz.

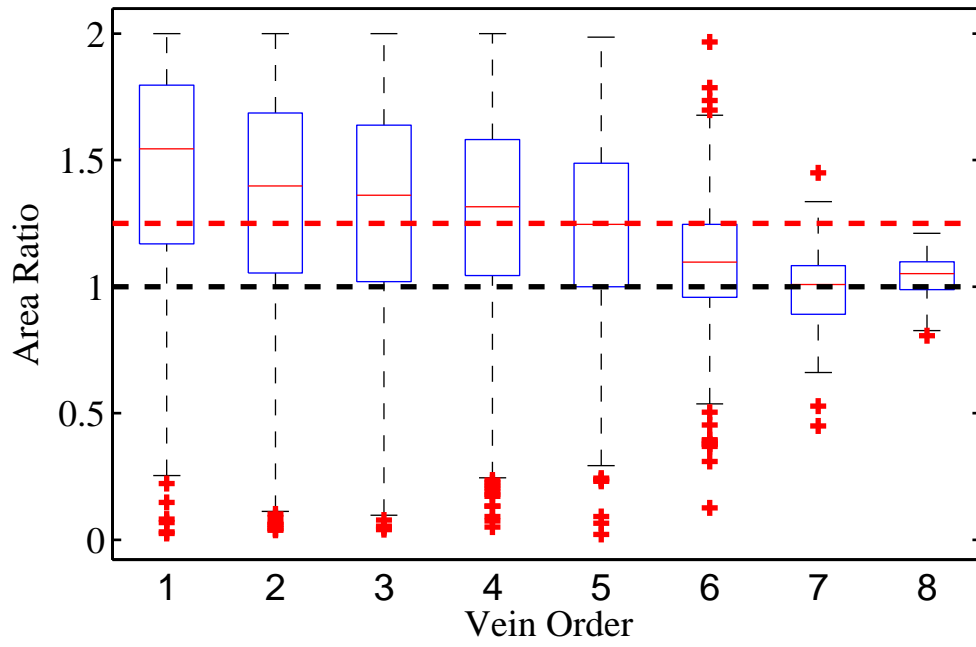

- - - Murrays Law - - - Elastic Similarity

*Blepharocarya involucrata* F.V. Muell

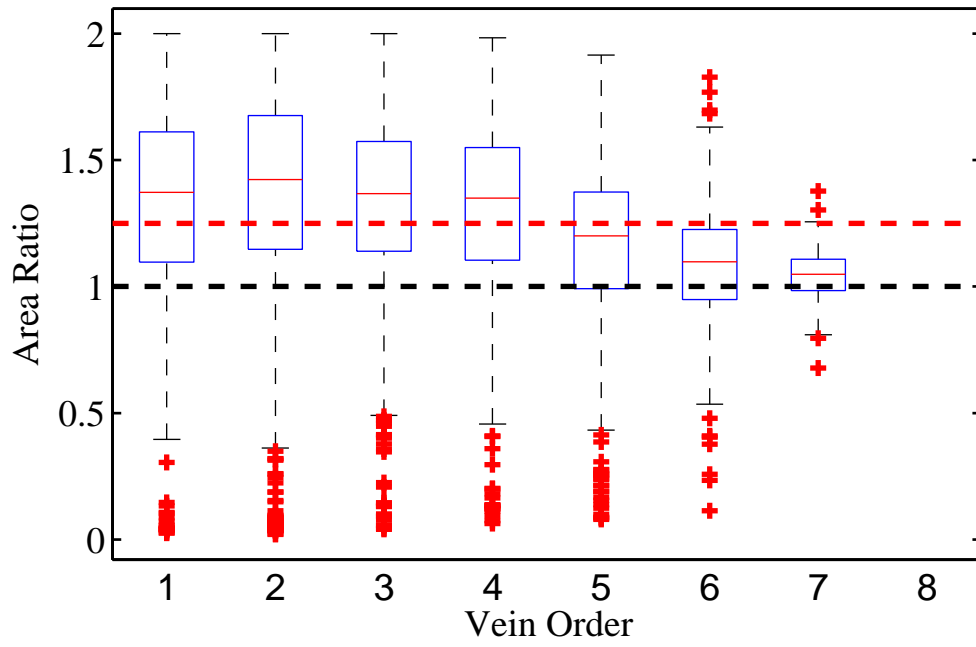

- - - Murrays Law - - - Elastic Similarity

*Alangium rotundifolium* (Hassk.) Bloemb.

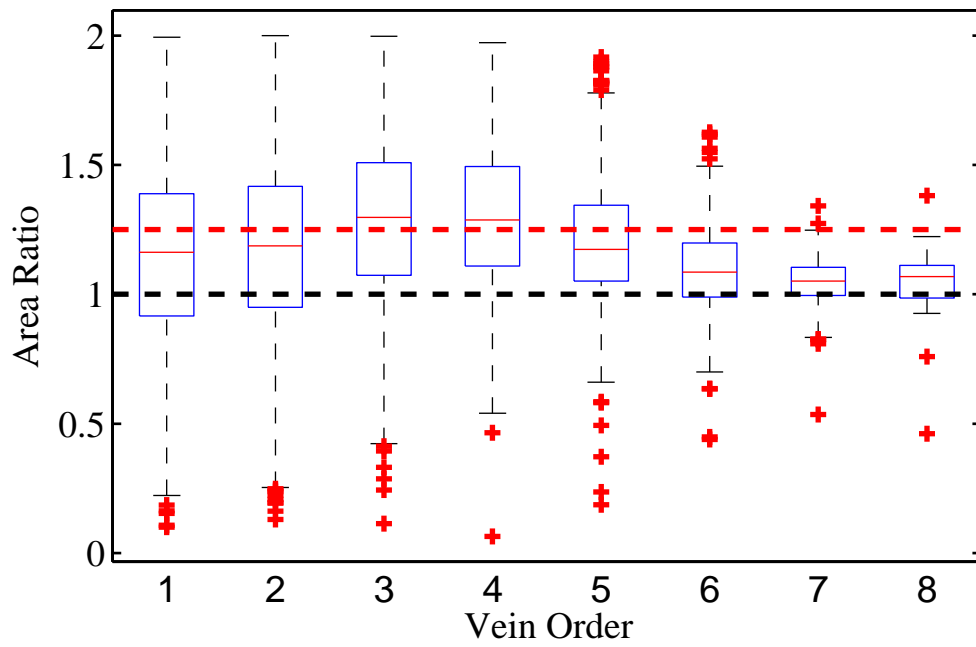



- - - Murrays Law - - - Elastic Similarity

*Monodora tenuifolia*

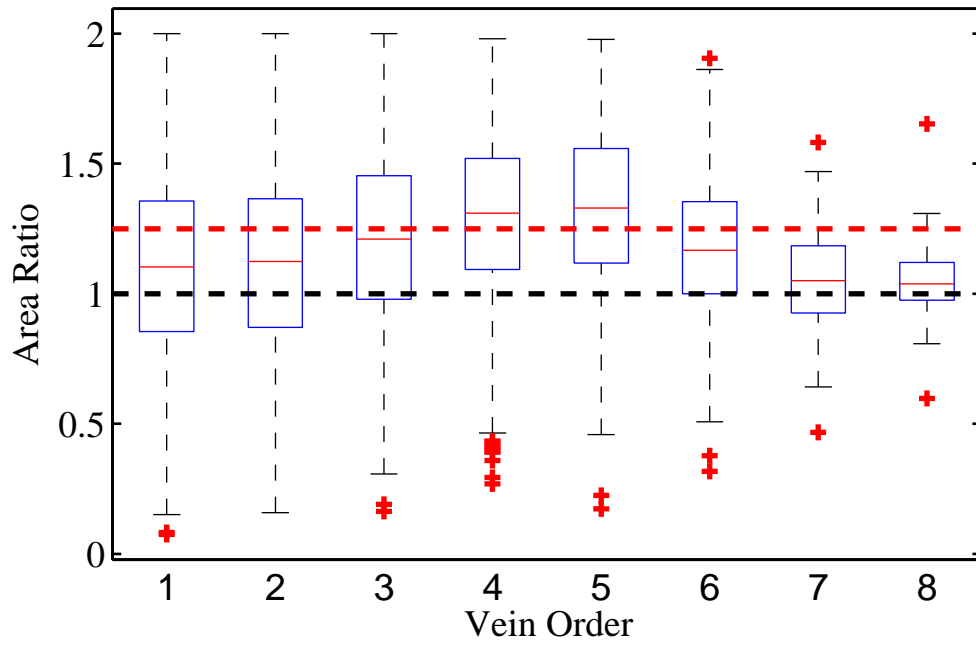

- - - Murrays Law   - - - Elastic Similarity

*Deeringothamnus pulchellus* Small

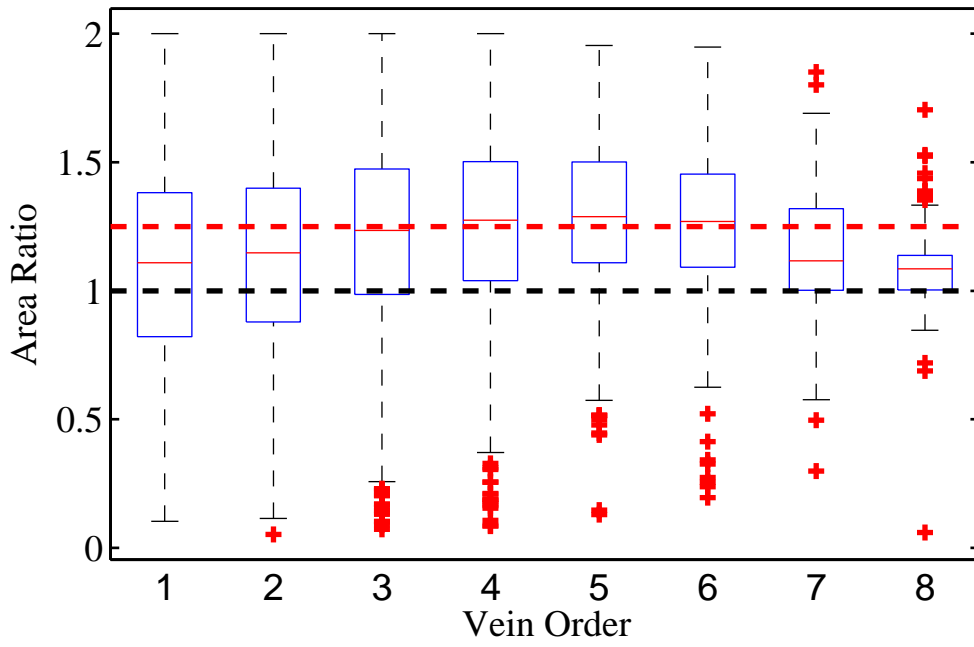

- - - Murrays Law   - - - Elastic Similarity

*Castanopsis caudata* Franch.

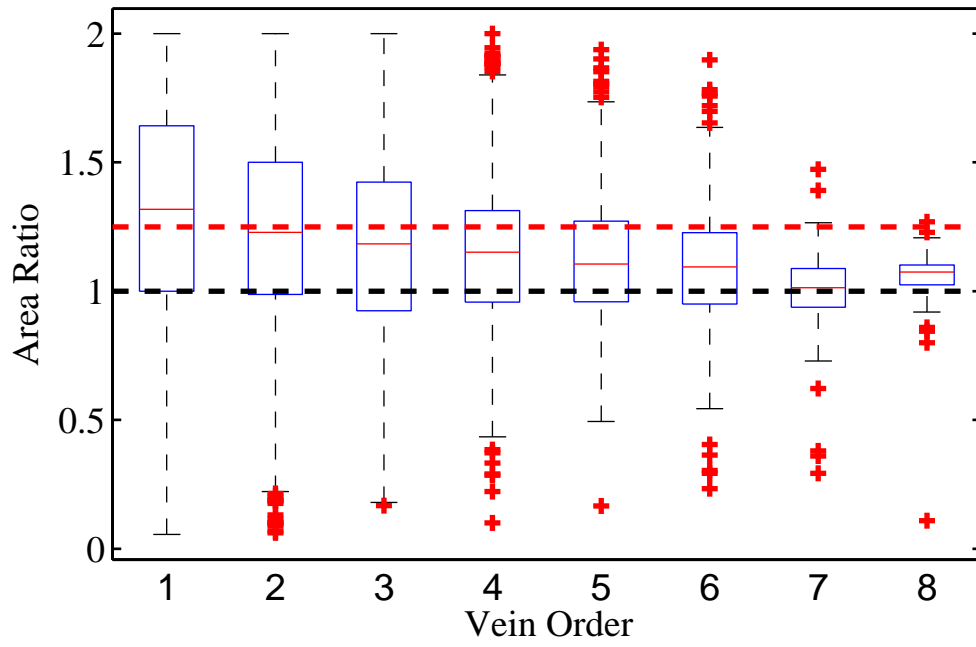

- - - Murrays Law - - - Elastic Similarity

*Eschweilera polyantha* A.C. Sm.

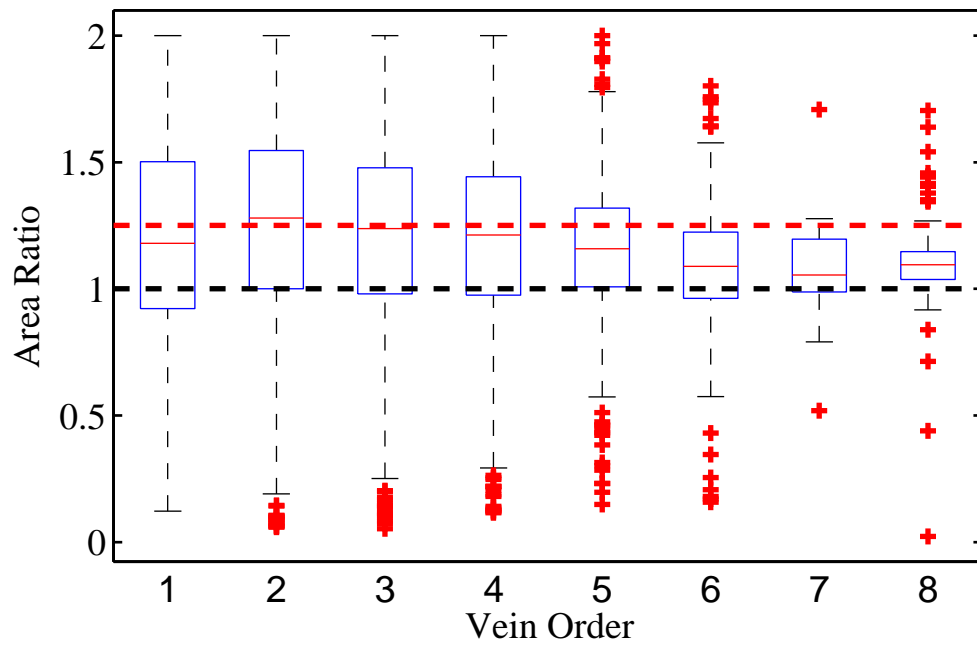

- - - Murrays Law   - - - Elastic Similarity

*Hoheria populnea* A. Cunn.

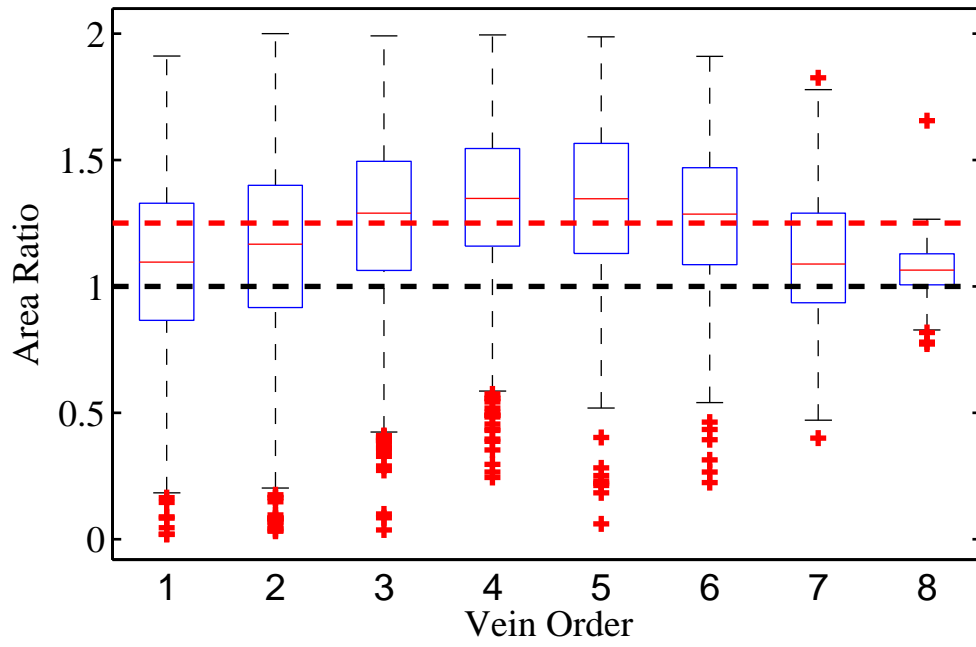

- - - Murrays Law   - - - Elastic Similarity

*Arbutus andrachne* L.

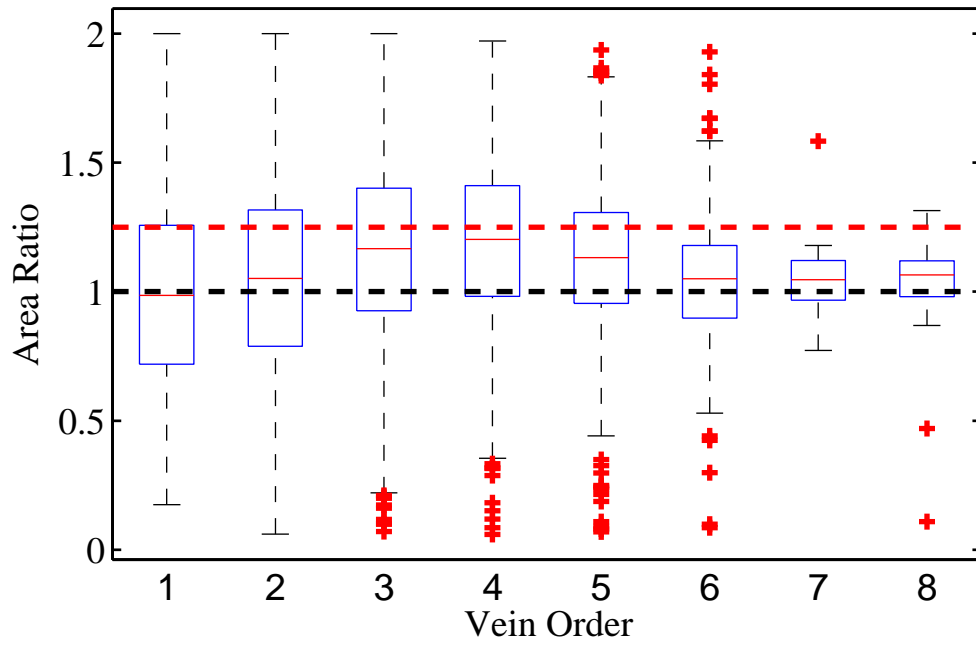

- - - Murrays Law - - - Elastic Similarity

Adenium somalense

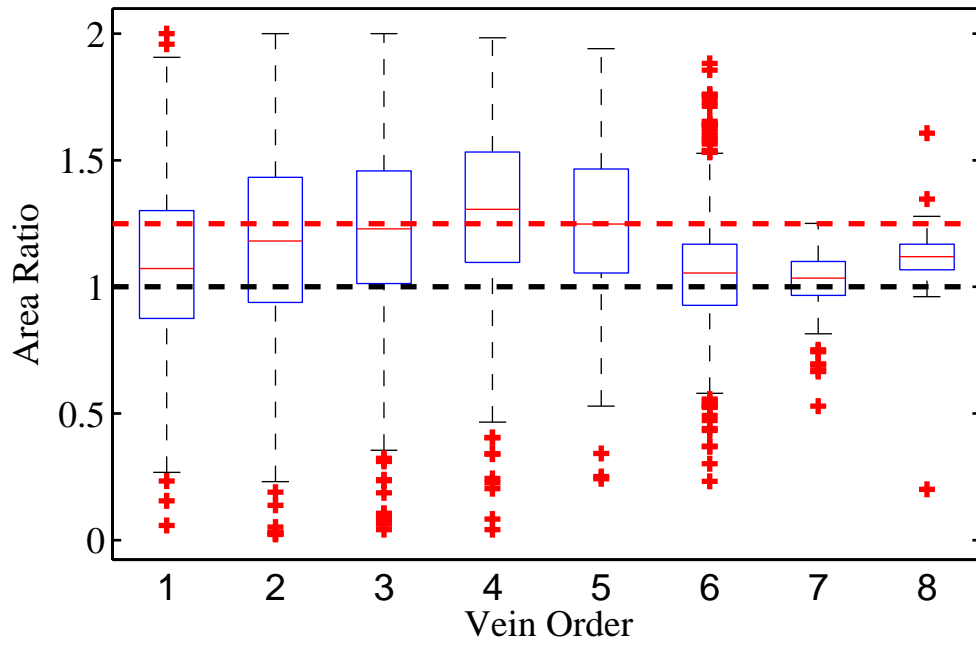

- - - Murrays Law   - - - Elastic Similarity

*Ancistrocladus vahlii* Arn.

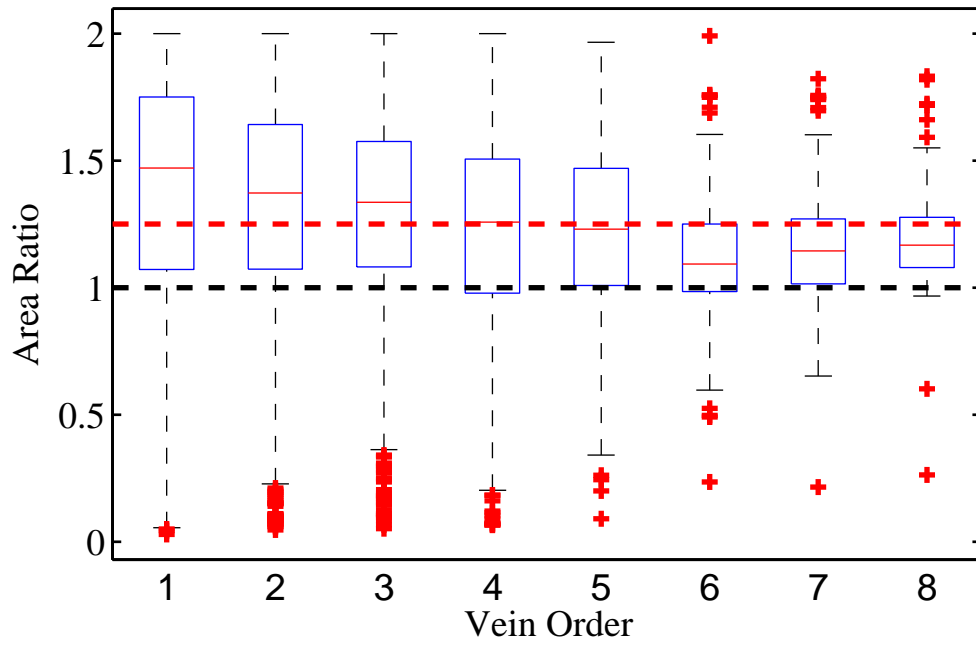



- - - Murrays Law - - - Elastic Similarity

*Lindackeria laurina* Presl.

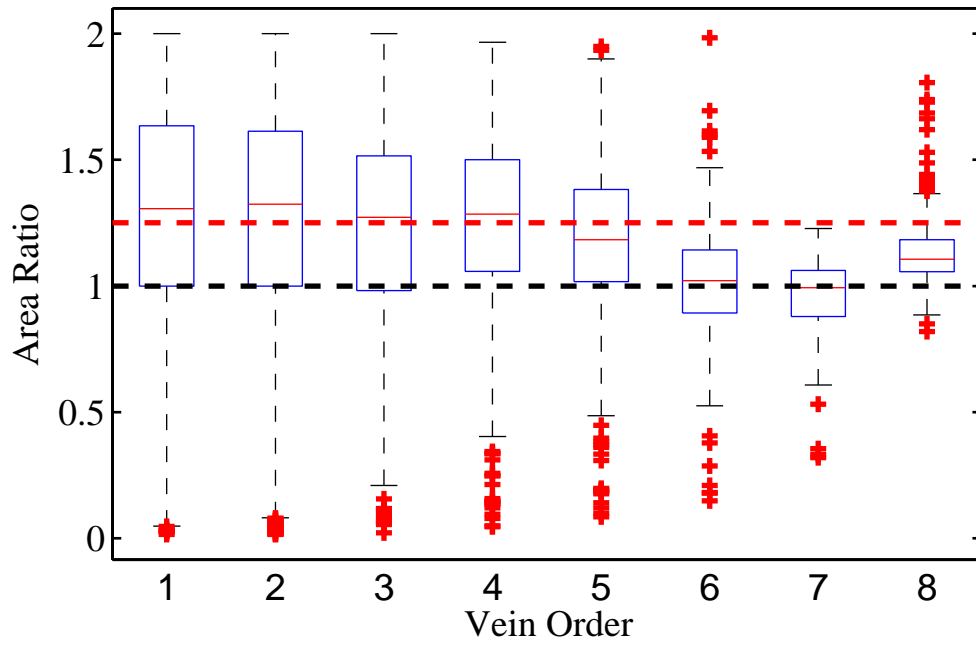

- - - Murrays Law    - - - Elastic Similarity

Rhododendron eclecticum Balf. F. & Forrest var. brachyandrum

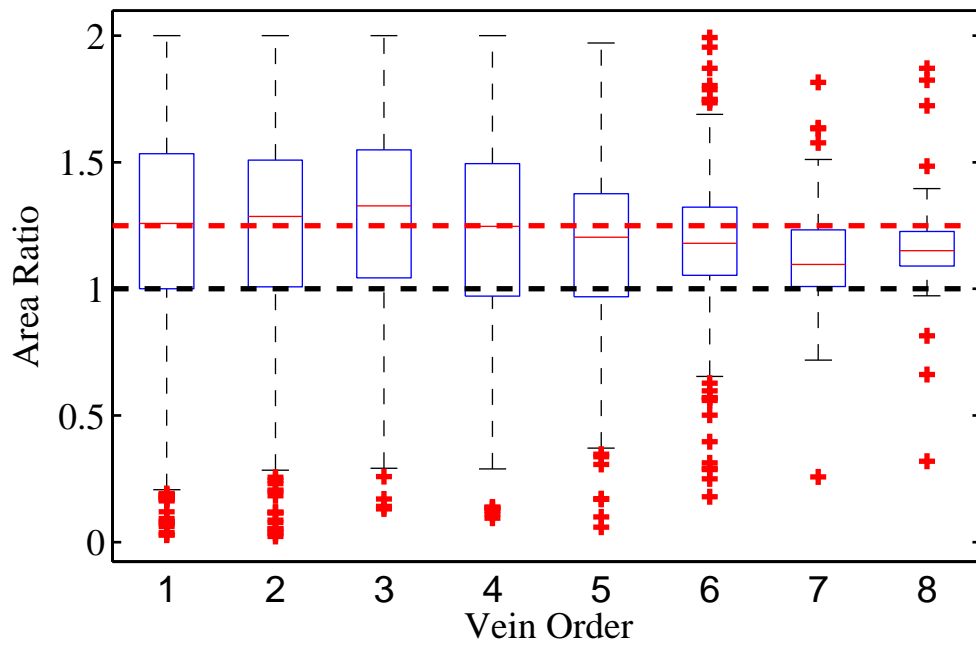

- - - Murrays Law   - - - Elastic Similarity

*Deeringothamnus pulchellus* Small

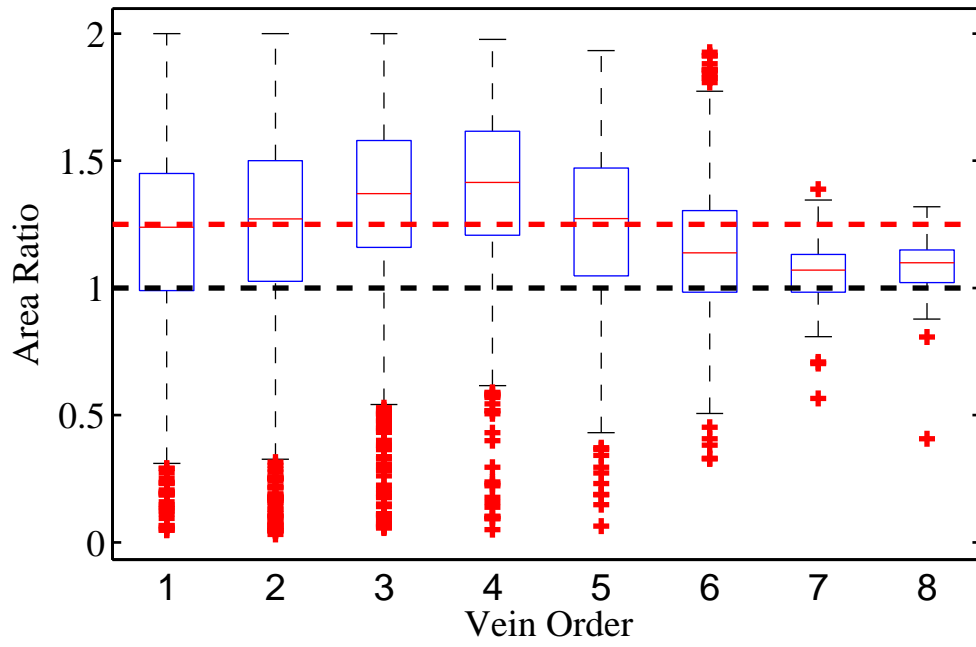

- - - Murrays Law   - - - Elastic Similarity

*Cordia dichotoma* Forst.F.

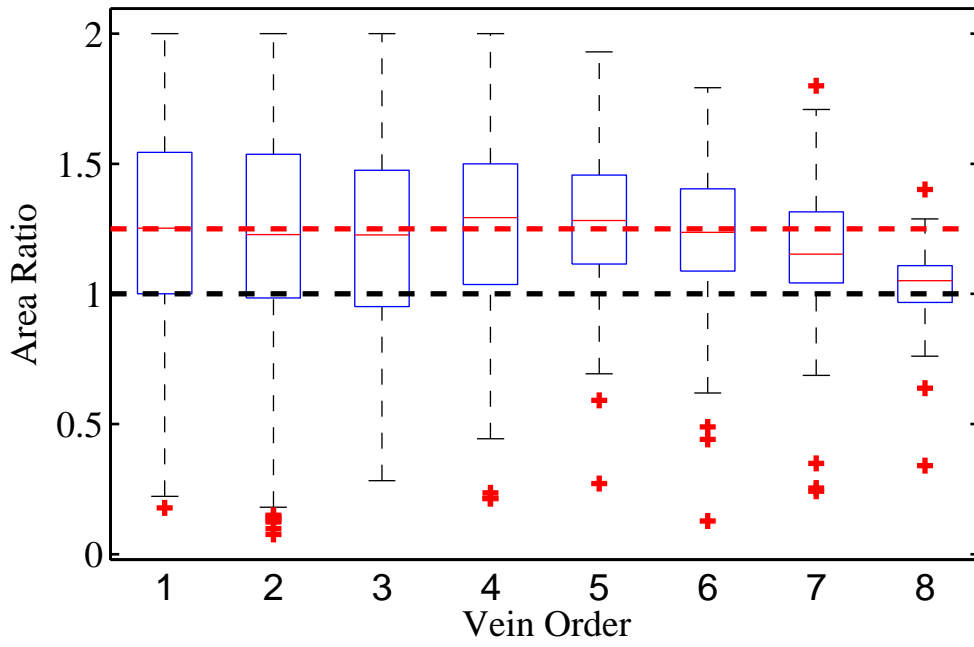

- - - Murrays Law   - - - Elastic Similarity

*Popowia englerana* Exell & Mendonga

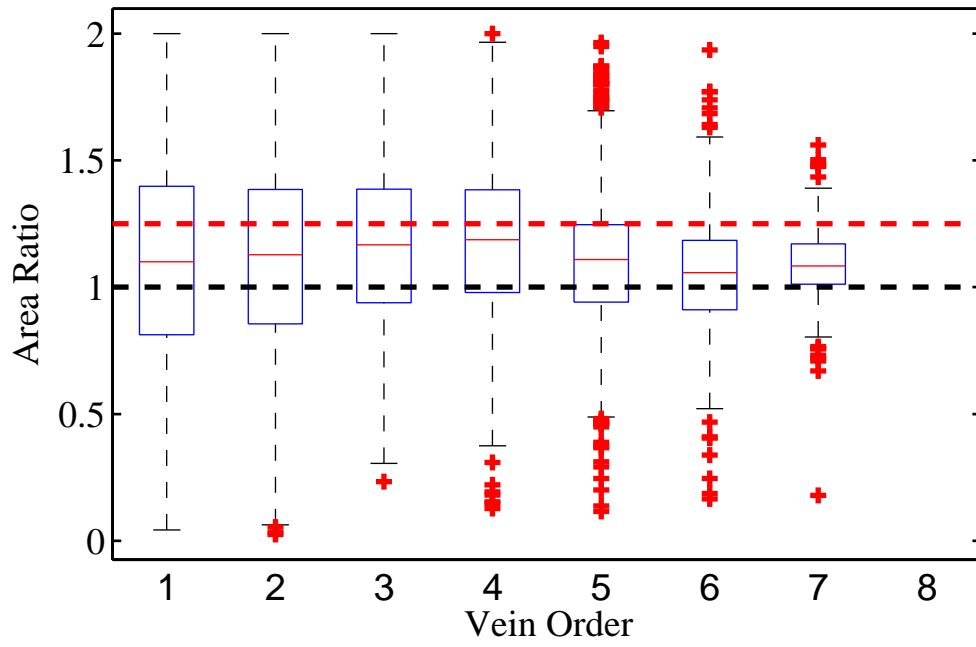

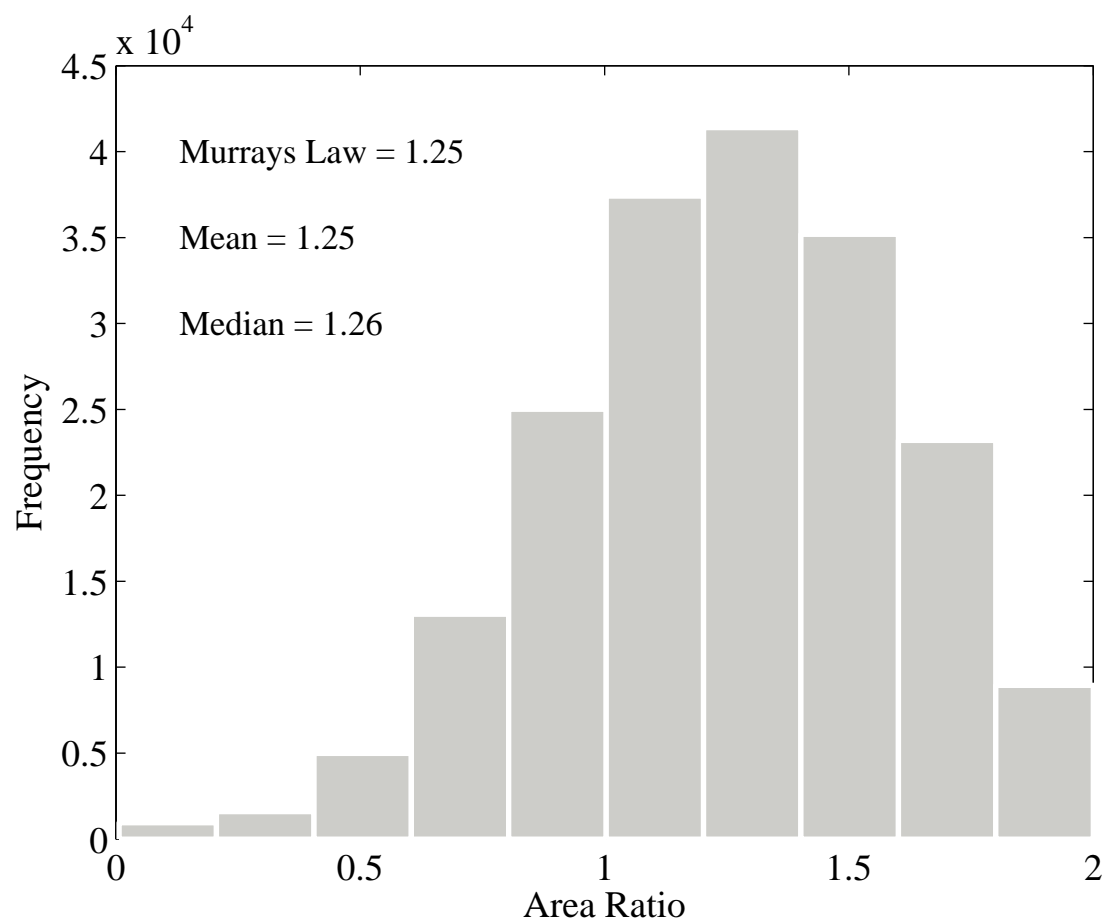

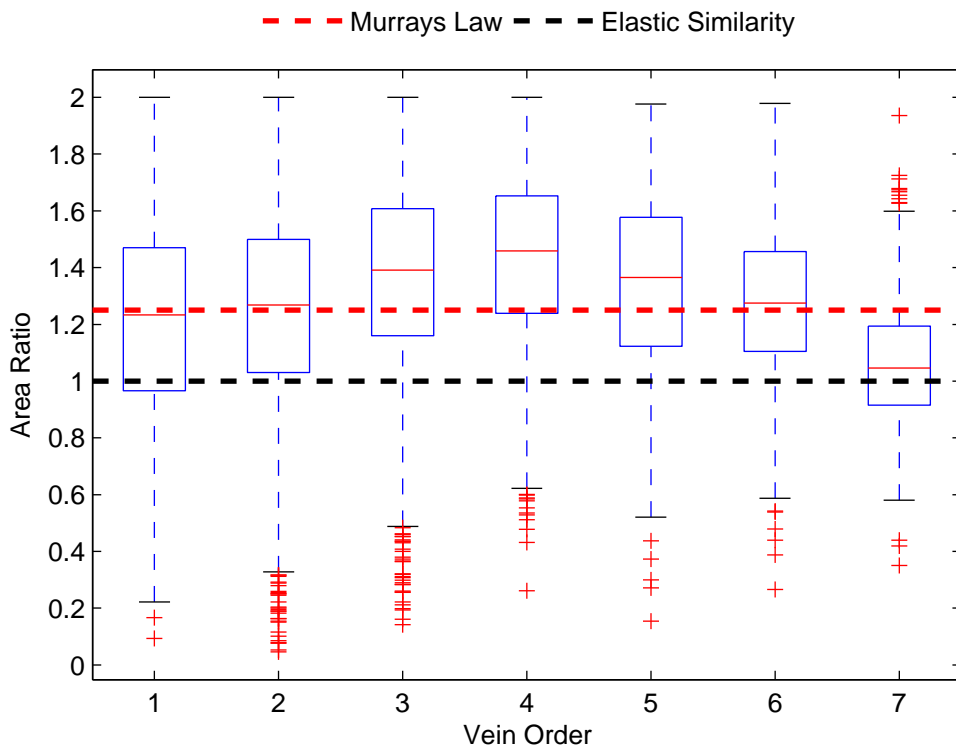

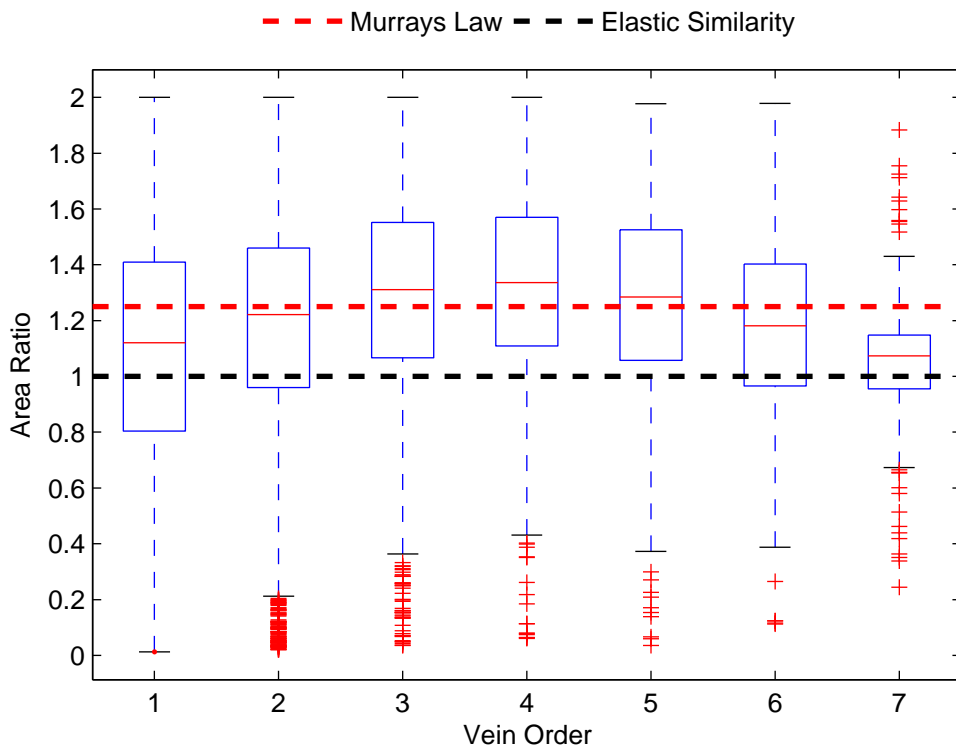



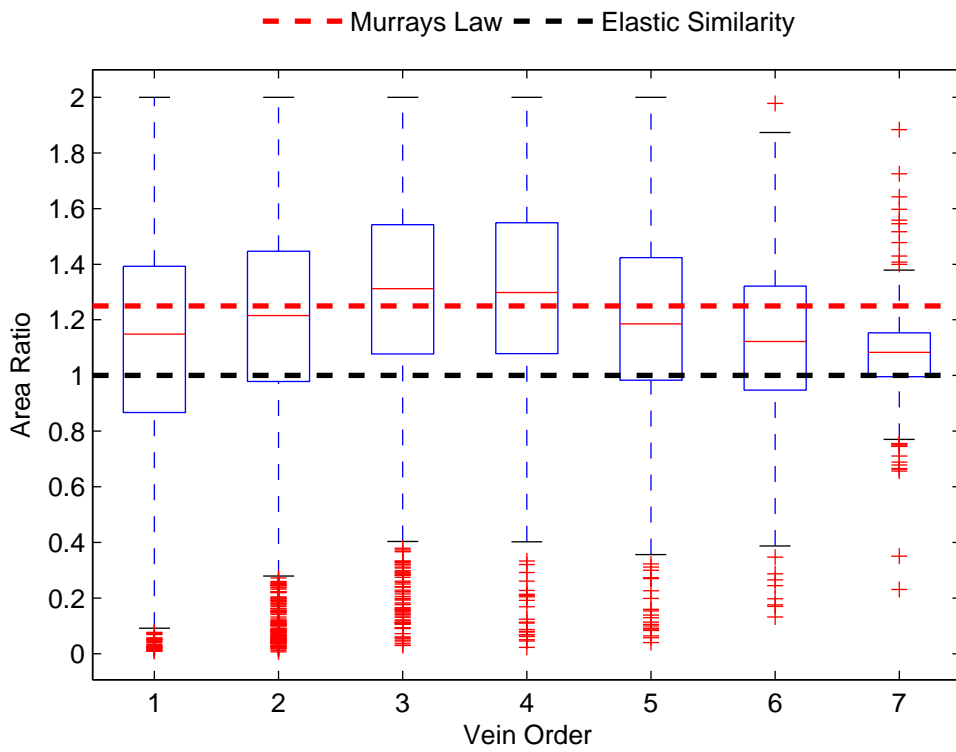

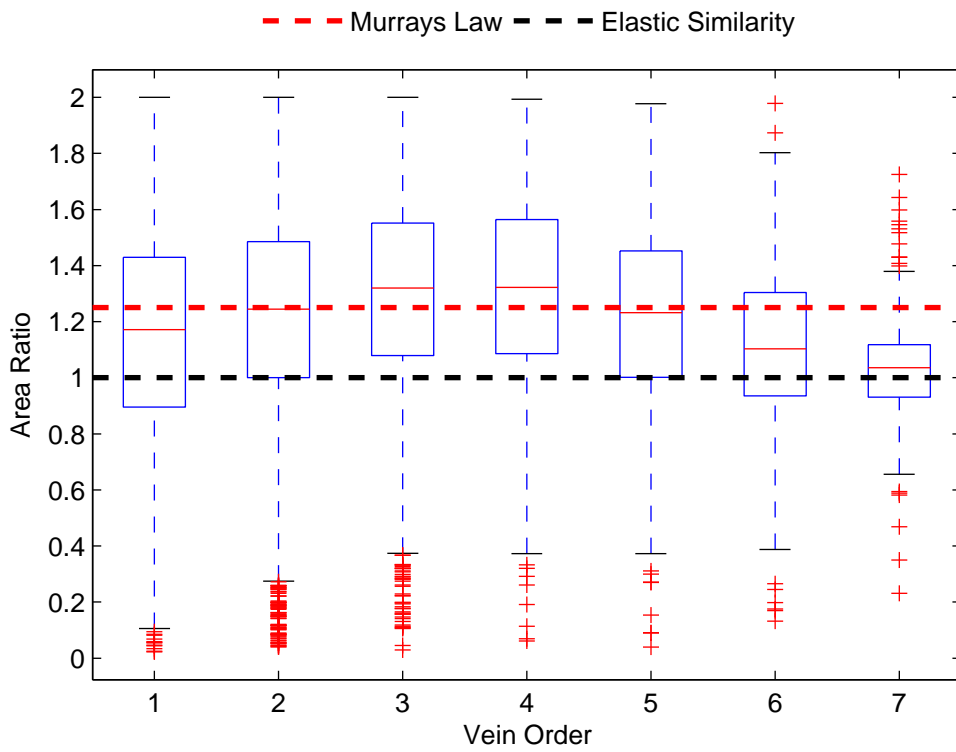

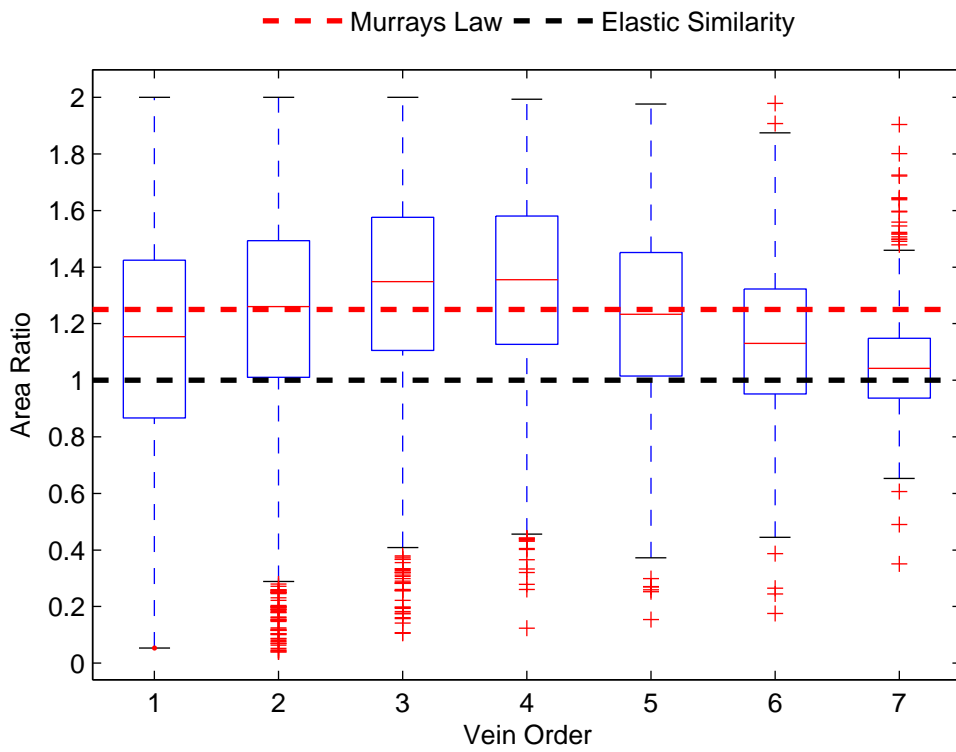

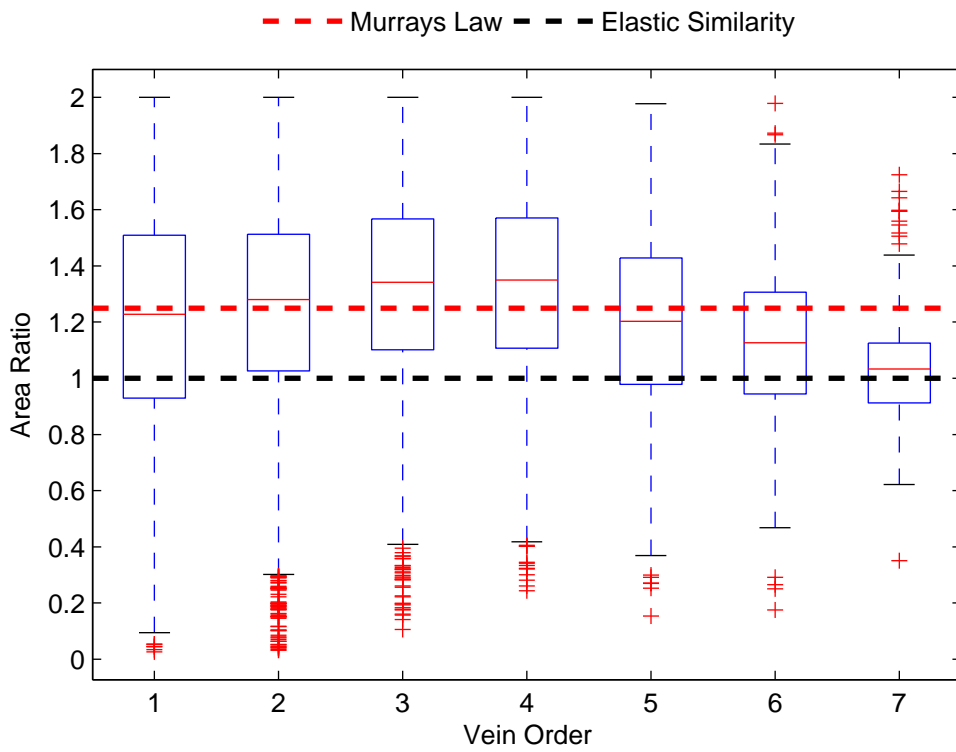

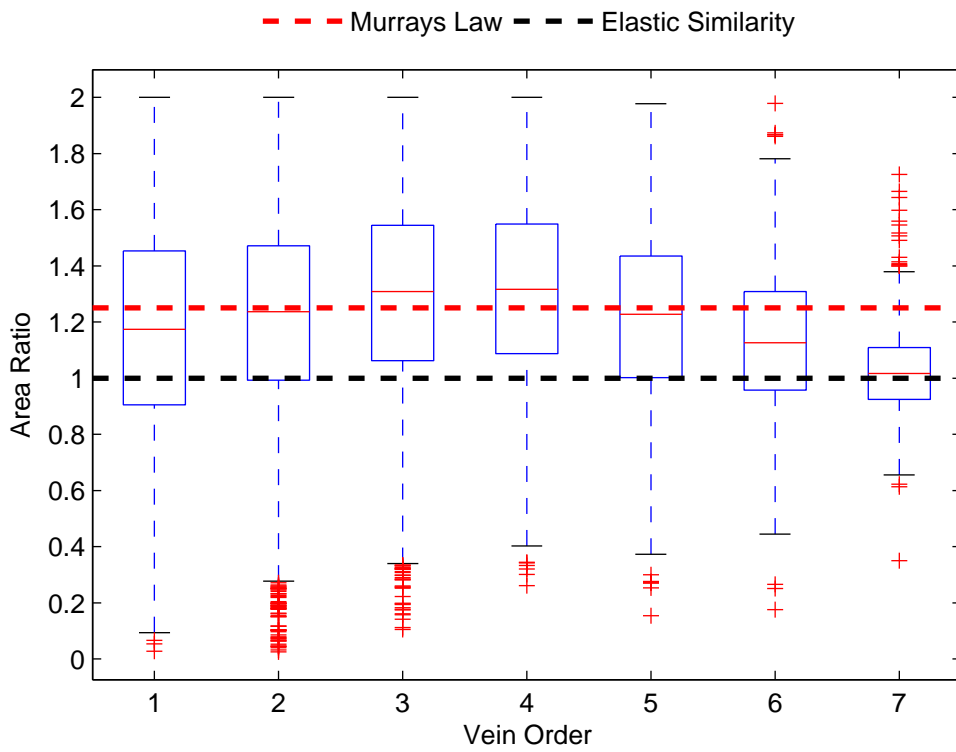

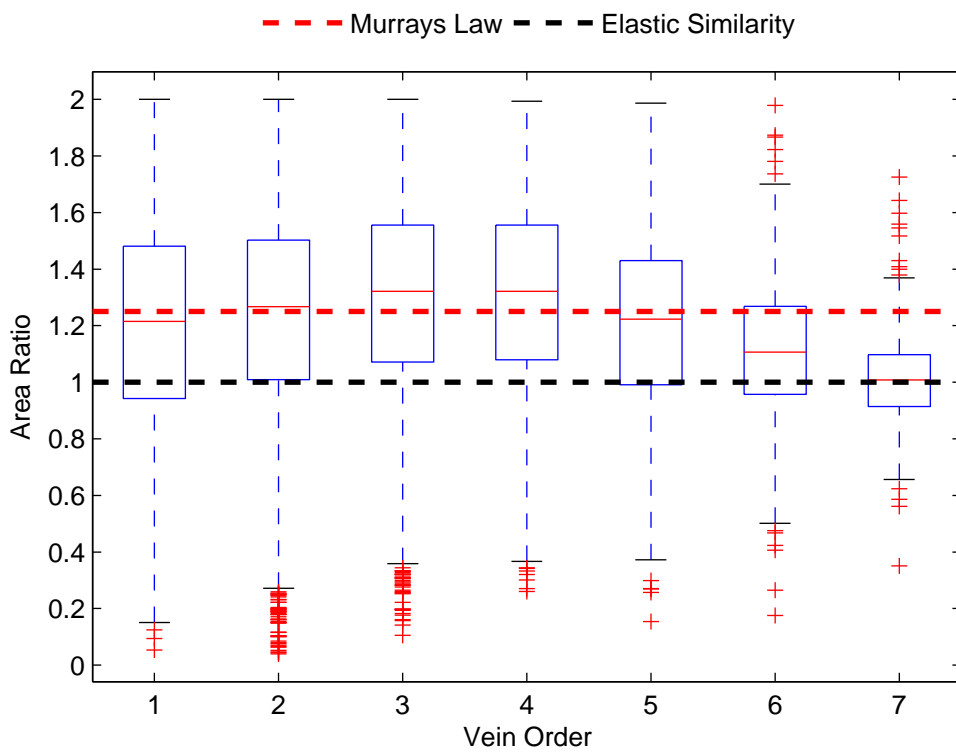

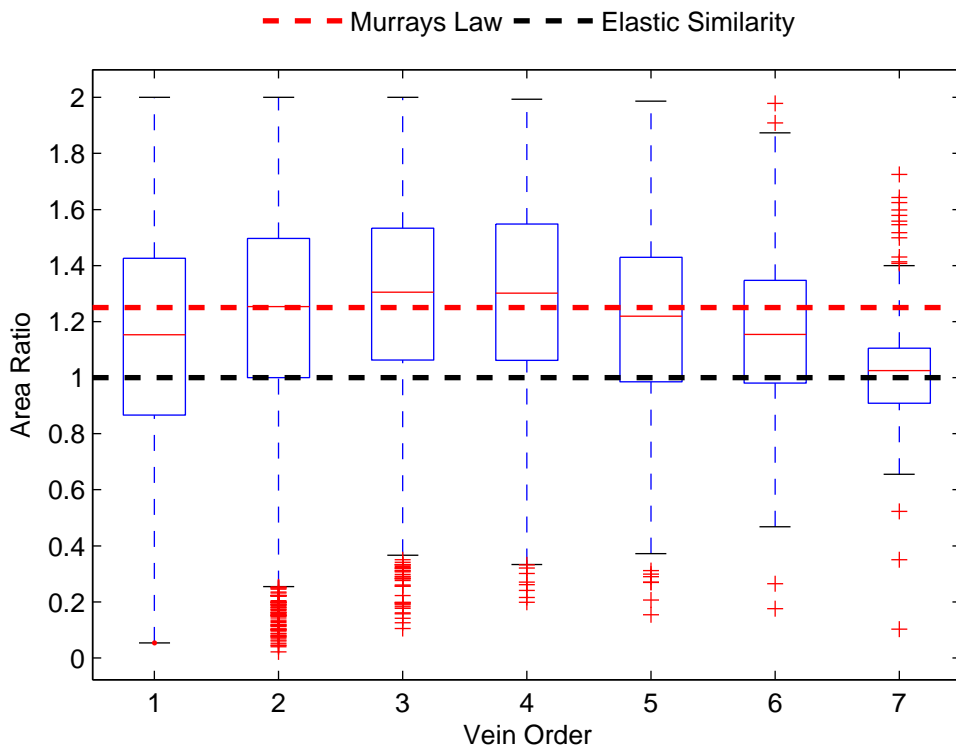

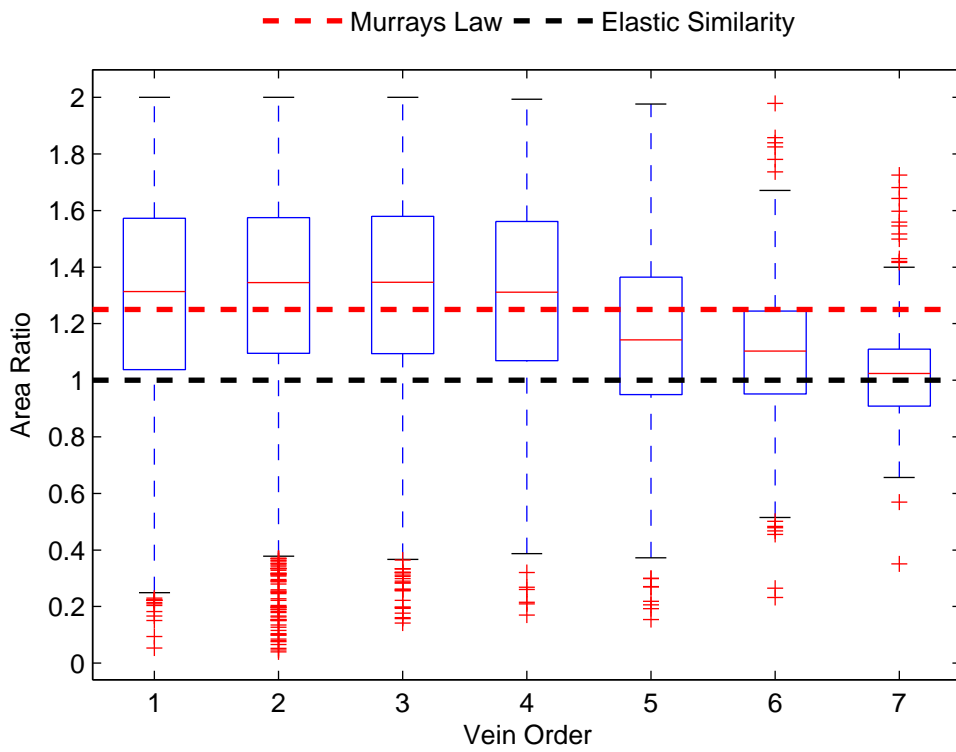

Supplement: pone.0085420.s001.pdf [file pone.0085420.s001.pdf]
